# Supplementary material
Source: PubMed Central journal article supplement (PMC3732456)

SUPPORTING INFORMATION

*Synthesis of Cyclopentenimines from N-Allyl Ynamides via a Tandem Aza-Claisen  
Rearrangement–Carbocyclization Sequence.*

authored by

Xiao-Na Wang,<sup>a</sup> Gabrielle Winston-McPherson,<sup>a</sup> Mary C. Walton,<sup>a</sup> Yu Zhang,<sup>b</sup>  
Richard P. Hsung,<sup>\*a</sup> and Kyle A. DeKorver<sup>\*b</sup>

*a. Division of Pharmaceutical Sciences and Department of Chemistry  
7111 Rennebohm Hall, 777 Highland Avenue*

*University of Wisconsin at Madison, Madison, WI 53705-2222*

*b. Dow AgroSciences LLC, 9330 Zionsville Road, Indianapolis, IN 46268*

**Table of Contents**

<sup>1</sup>H, <sup>13</sup>C, <sup>31</sup>P, gCOSY and NOESY1D spectra

S2-S122

KAD-03-181\_16Mar2012

Pulse Sequence: s2pul  
Spectrometer Freq.: 499.73 MHz  
Solvent: CDCl<sub>3</sub>

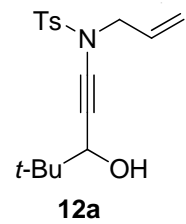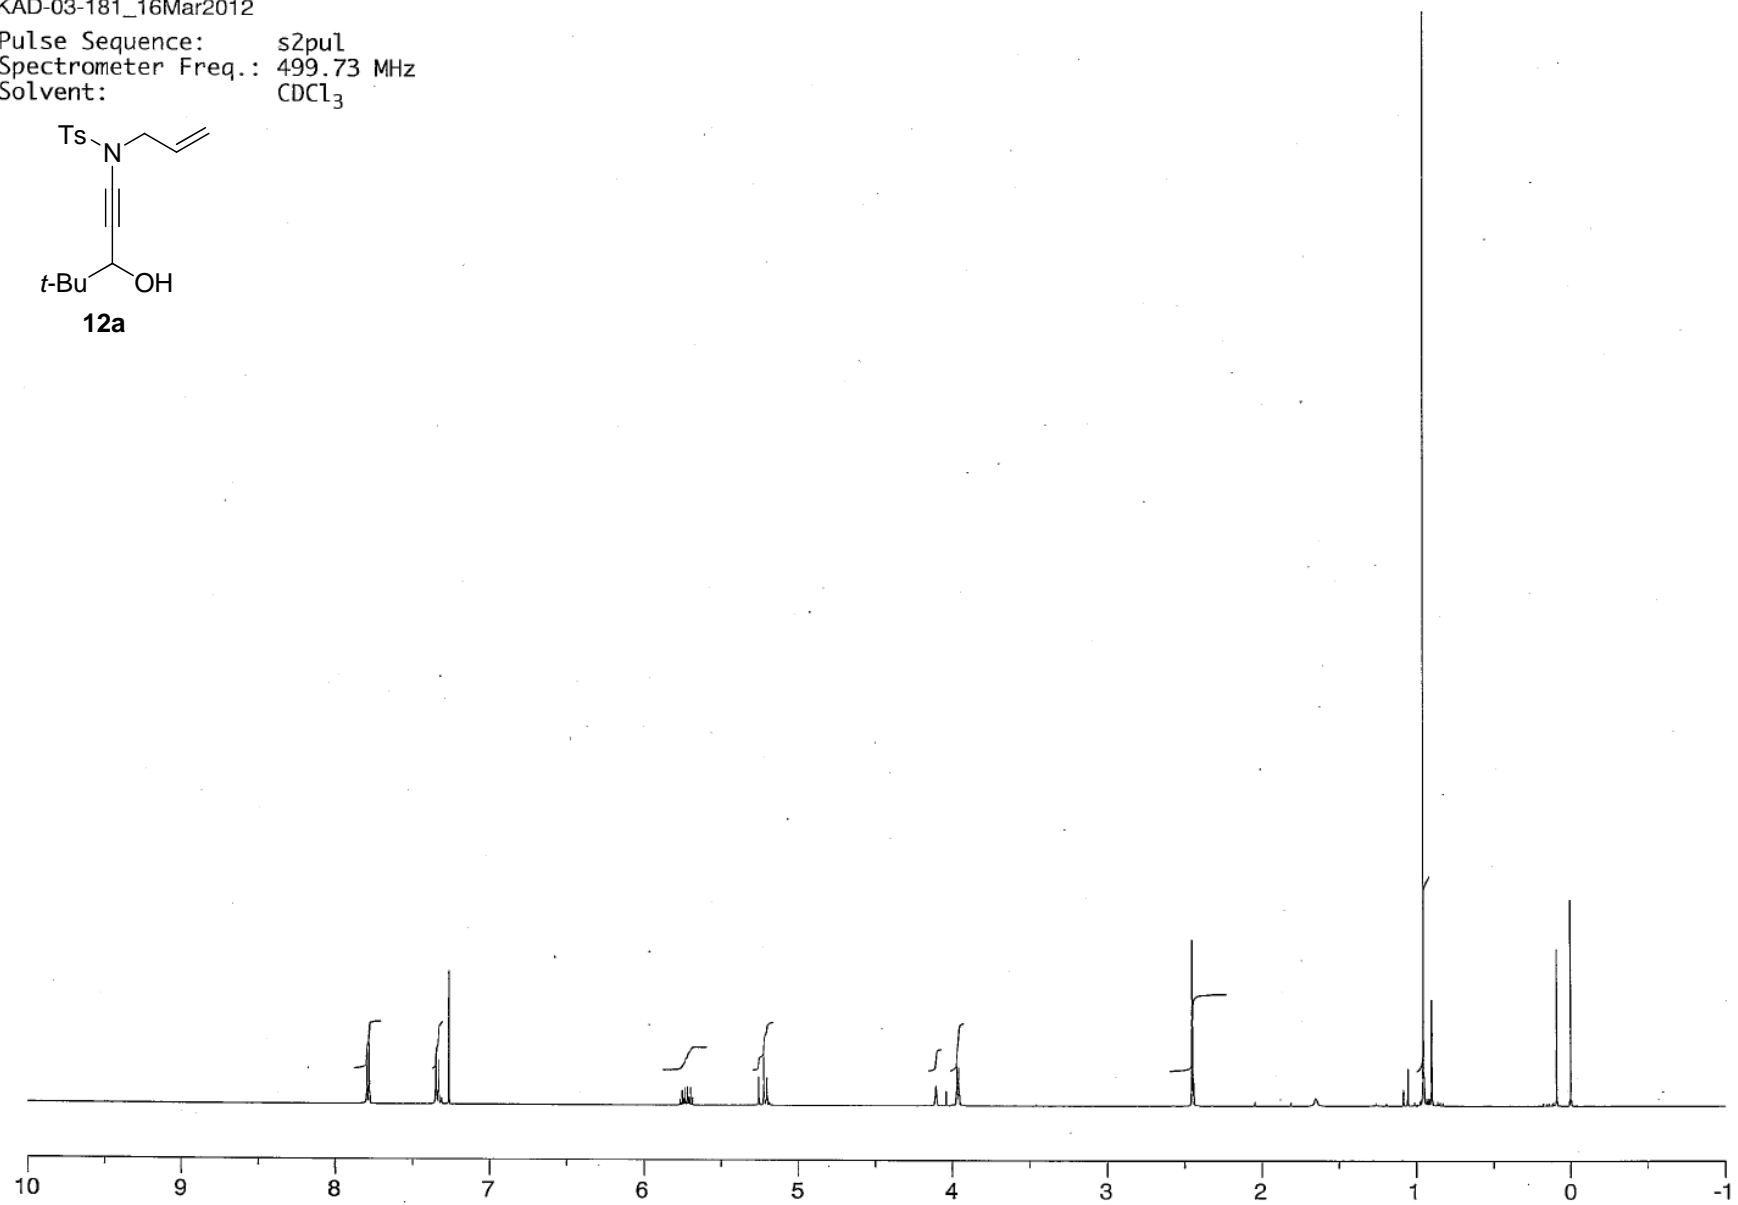

KAD-03-181\_16Mar2012

Pulse Sequence: s2pu1  
Spectrometer Freq.: 125.67 MHz  
Solvent: CDCl<sub>3</sub>

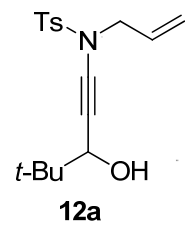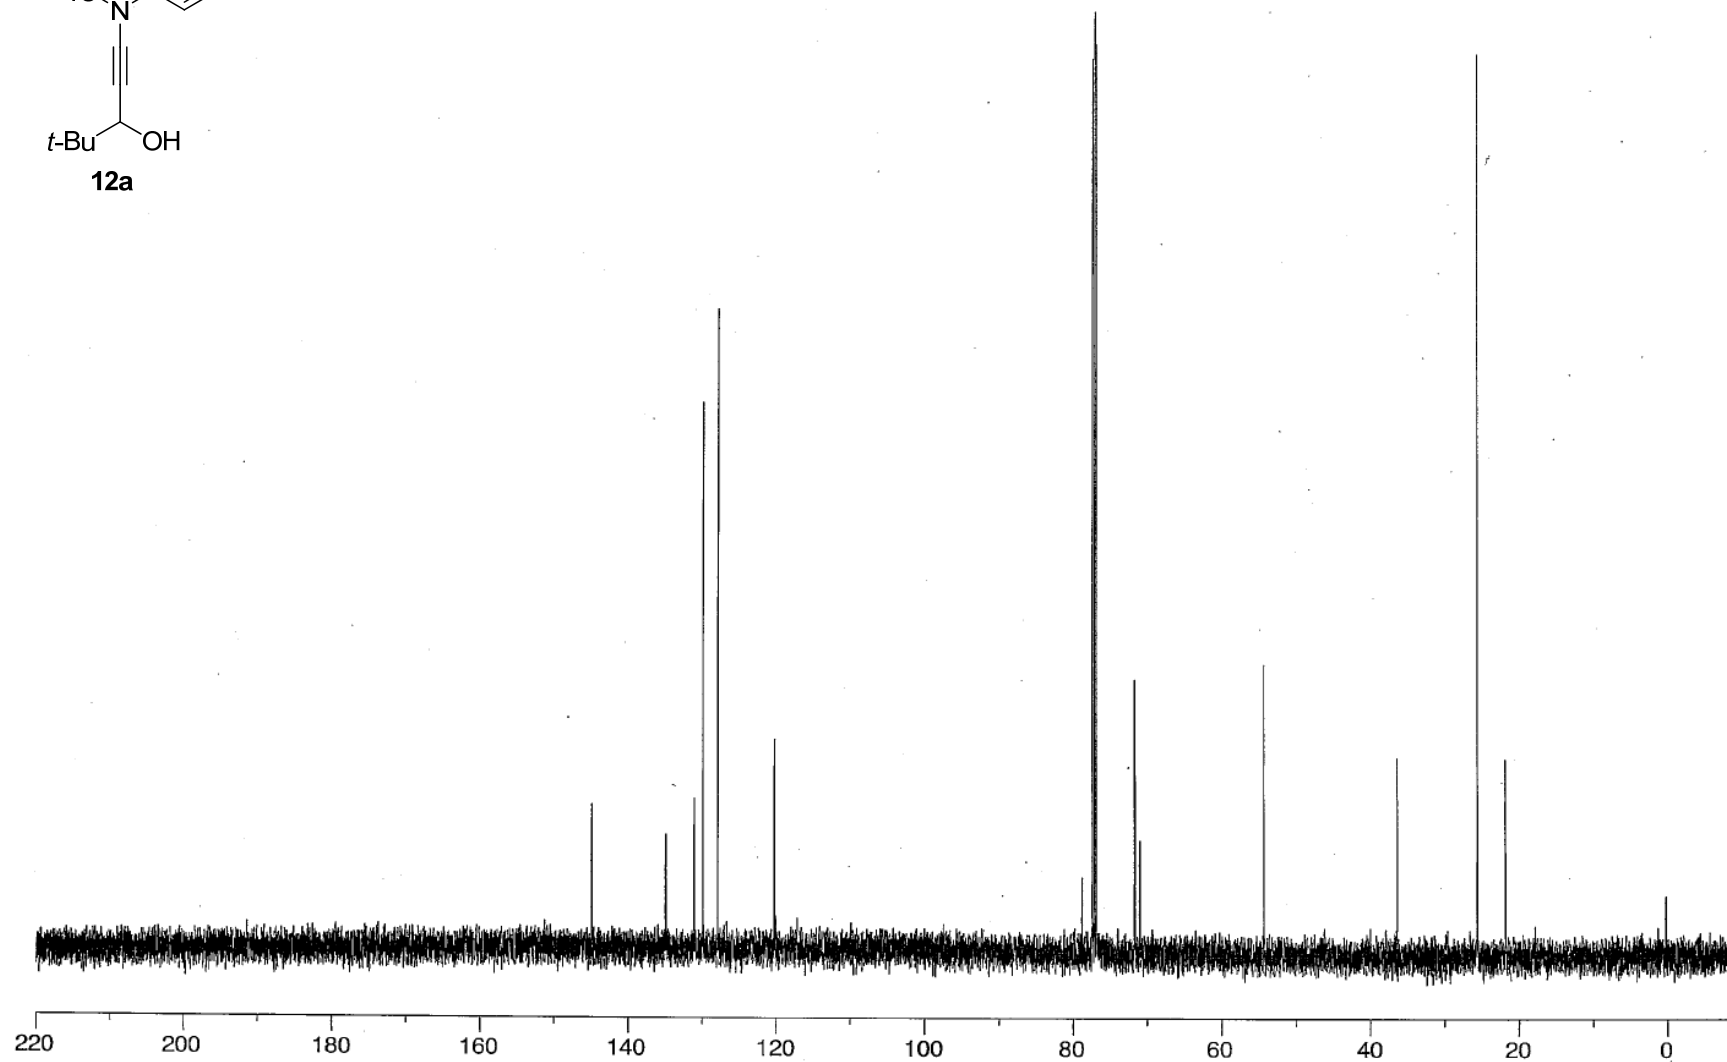

MW-1-132\_30Aug2011

Pulse Sequence: s2pul  
Spectrometer Freq.: 399.79 MHz  
Solvent: CDCl<sub>3</sub>

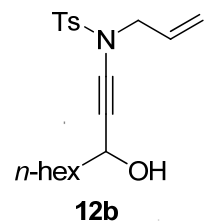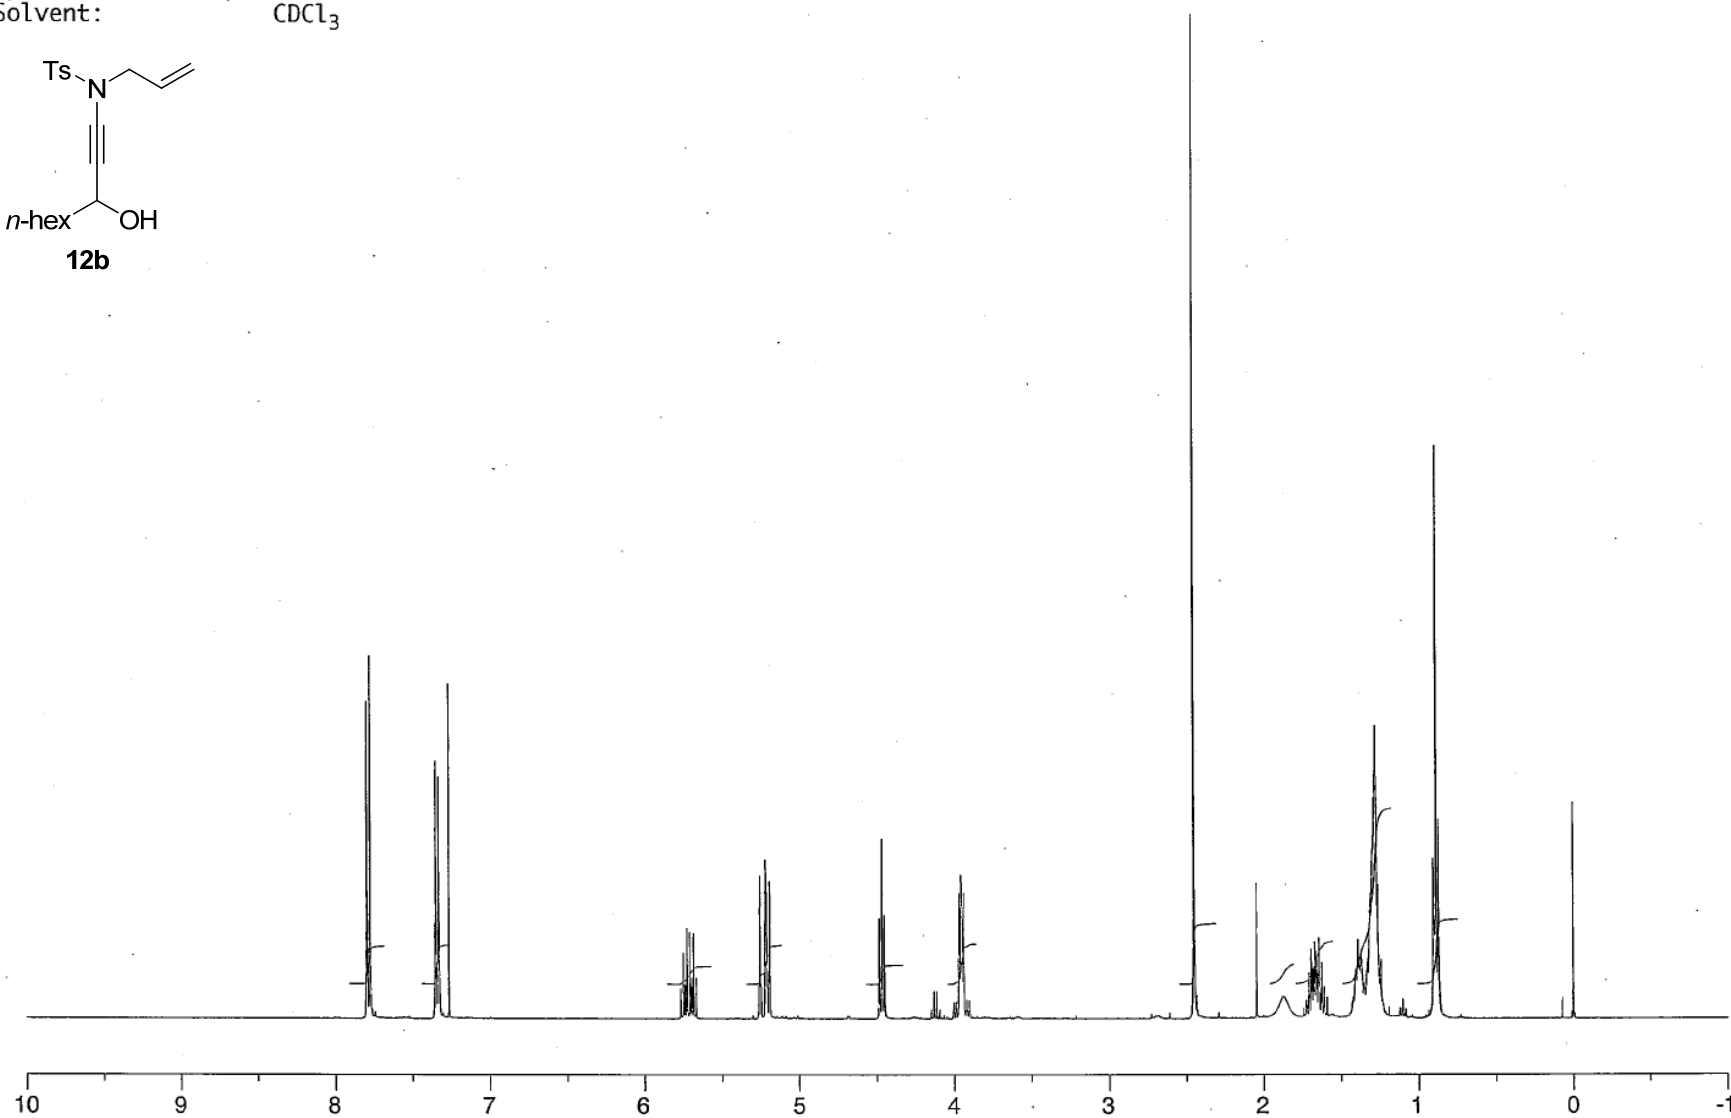

MW-1-132\_30Aug2011

Pulse Sequence: s2pul  
Spectrometer Freq.: 100.54 MHz  
Solvent: CDCl<sub>3</sub>

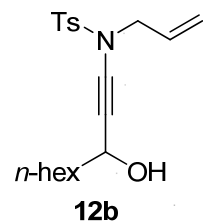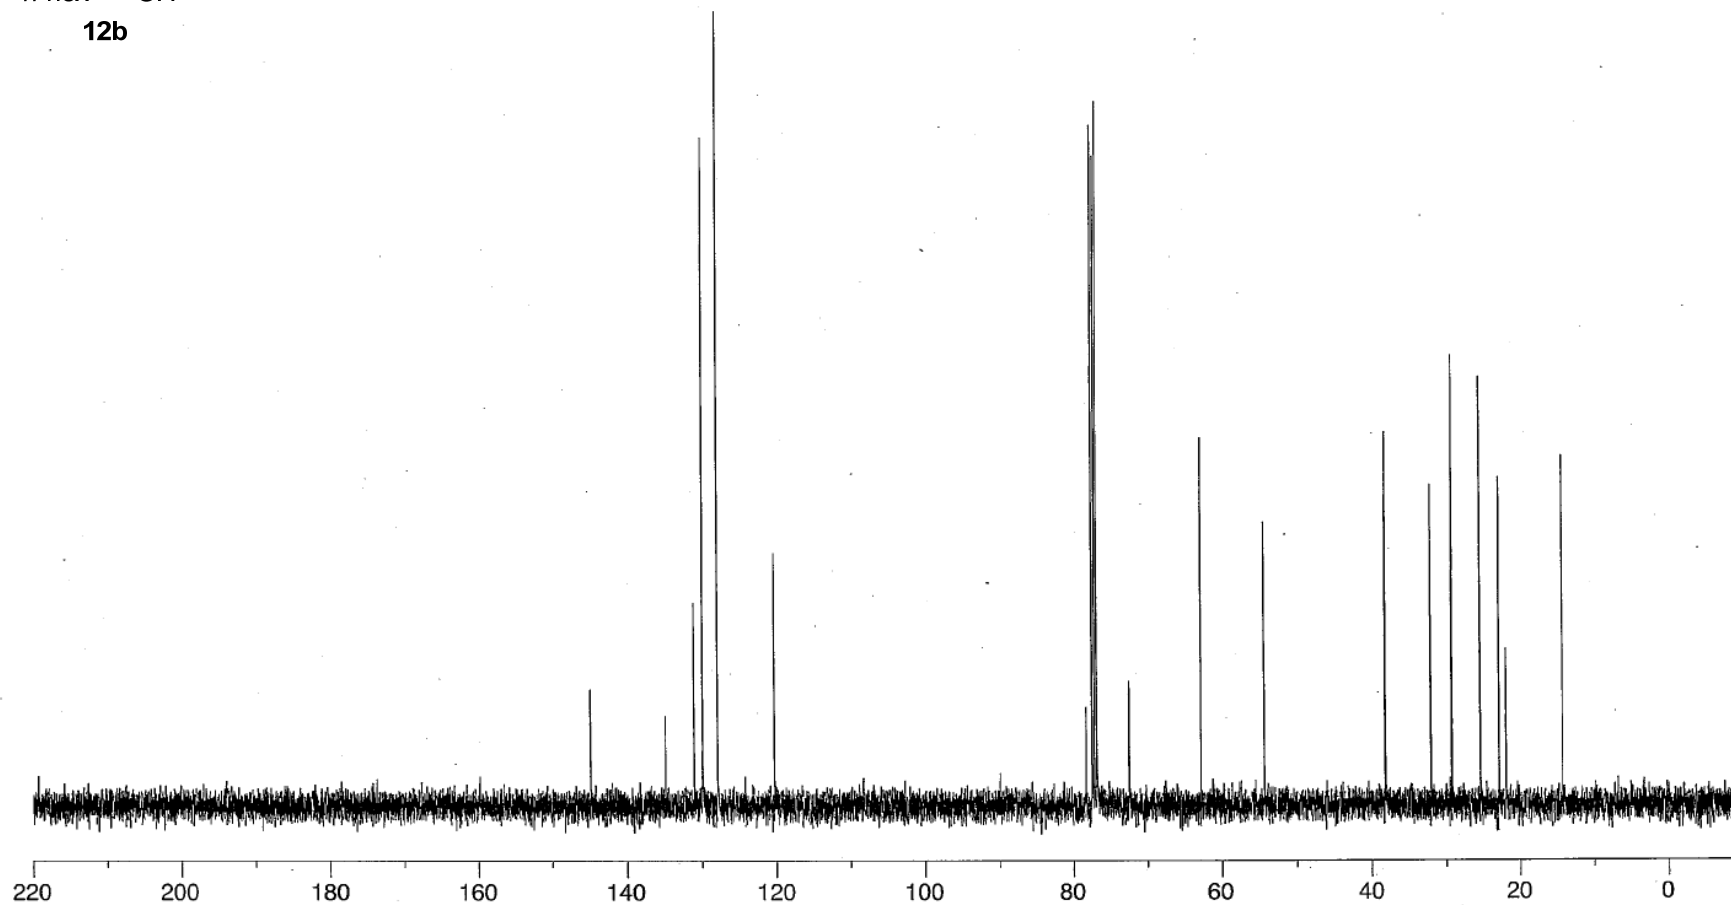

GWM-01-069\_01Aug2011

Pulse Sequence: s2pul  
Spectrometer Freq.: 399.79 MHz  
Solvent: CDCl<sub>3</sub>

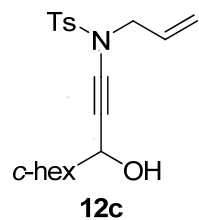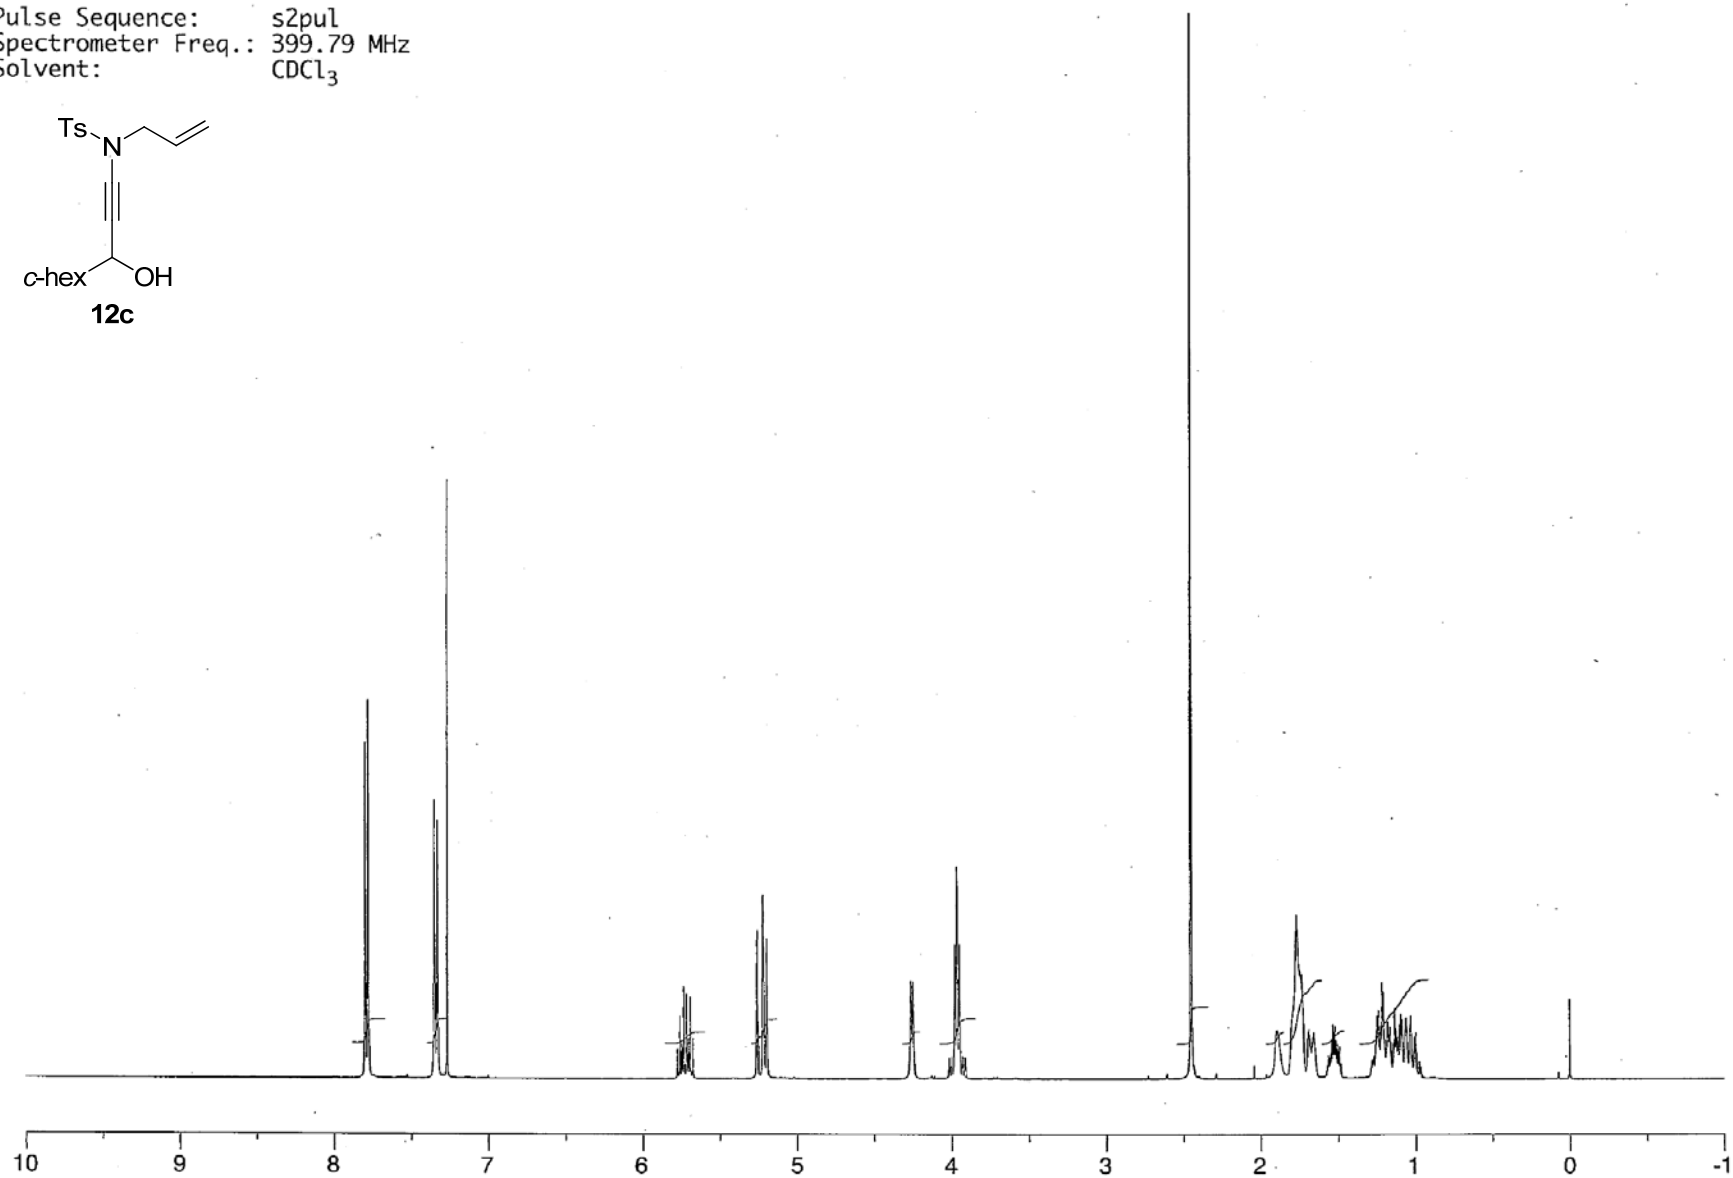

GWM-01-069\_01Aug2011

Pulse Sequence: s2pul  
Spectrometer Freq.: 100.54 MHz  
Solvent: CDCl<sub>3</sub>

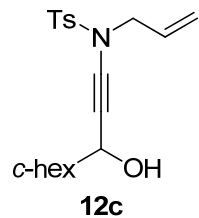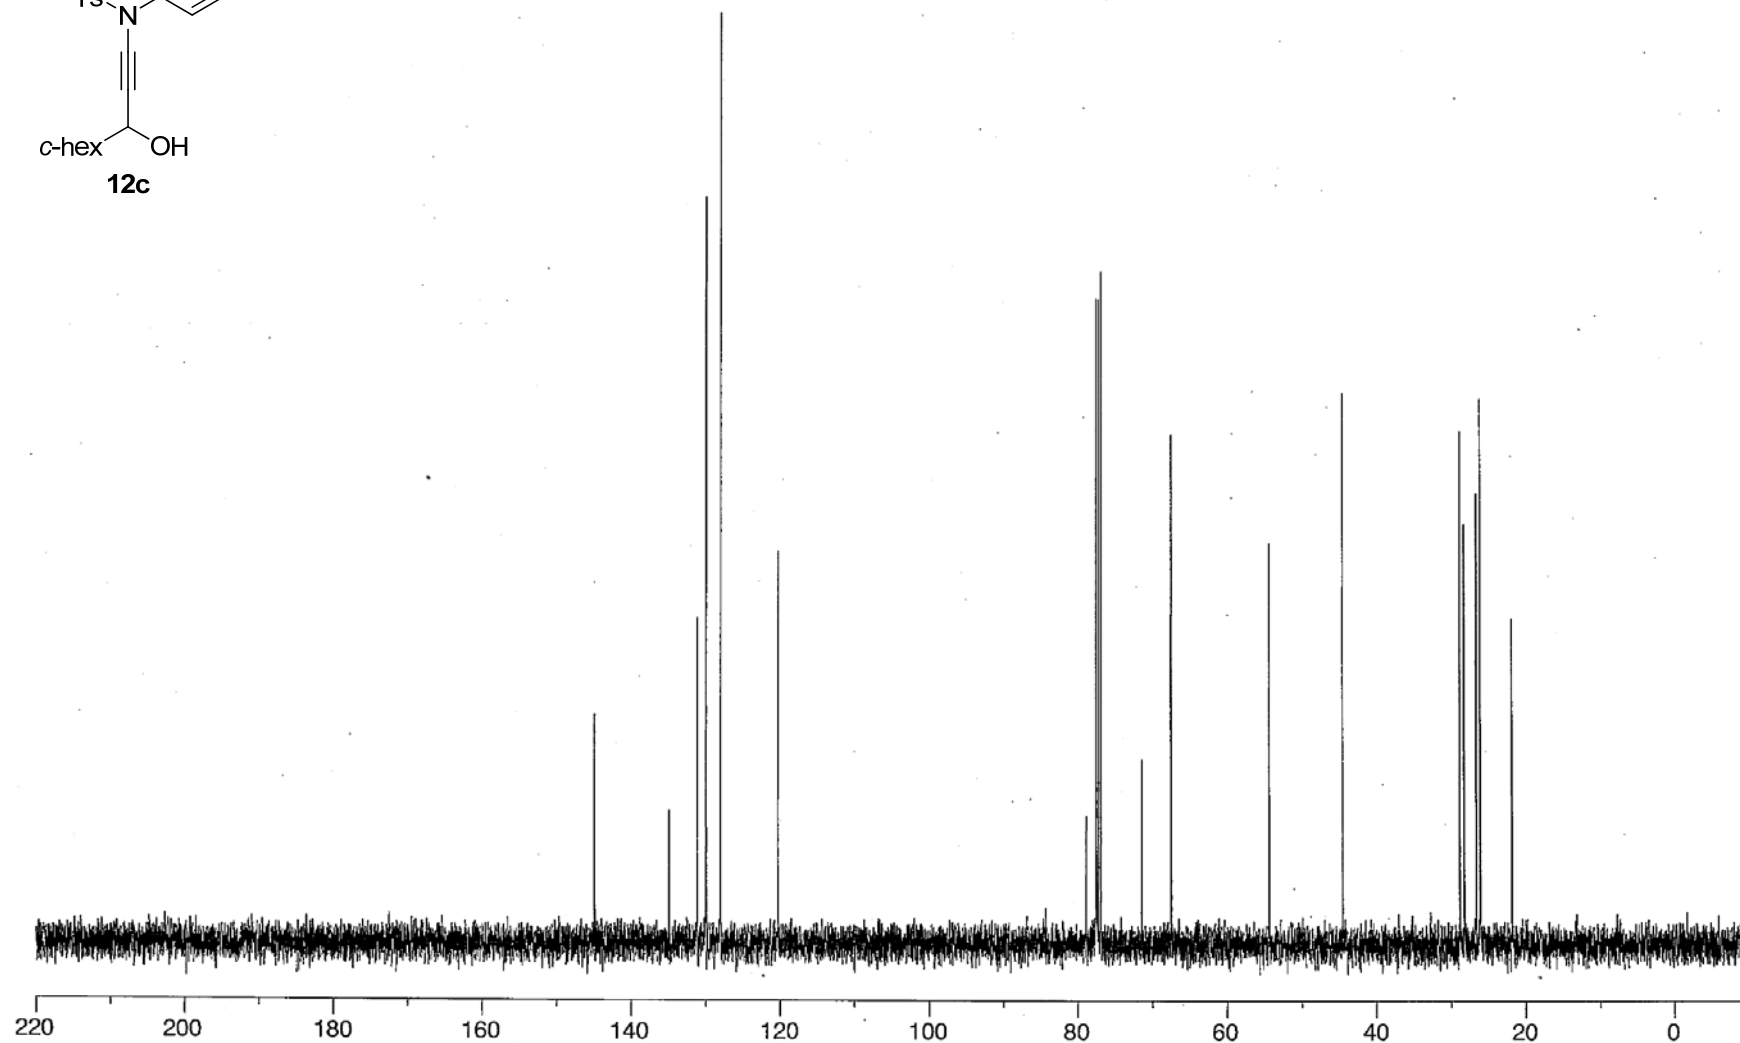

gwm-l-65\_29Jul2011

Pulse Sequence: s2pu1  
Spectrometer Freq.: 399.79 MHz  
Solvent: CDCl<sub>3</sub>

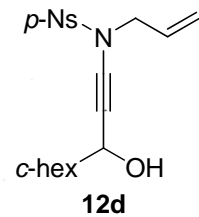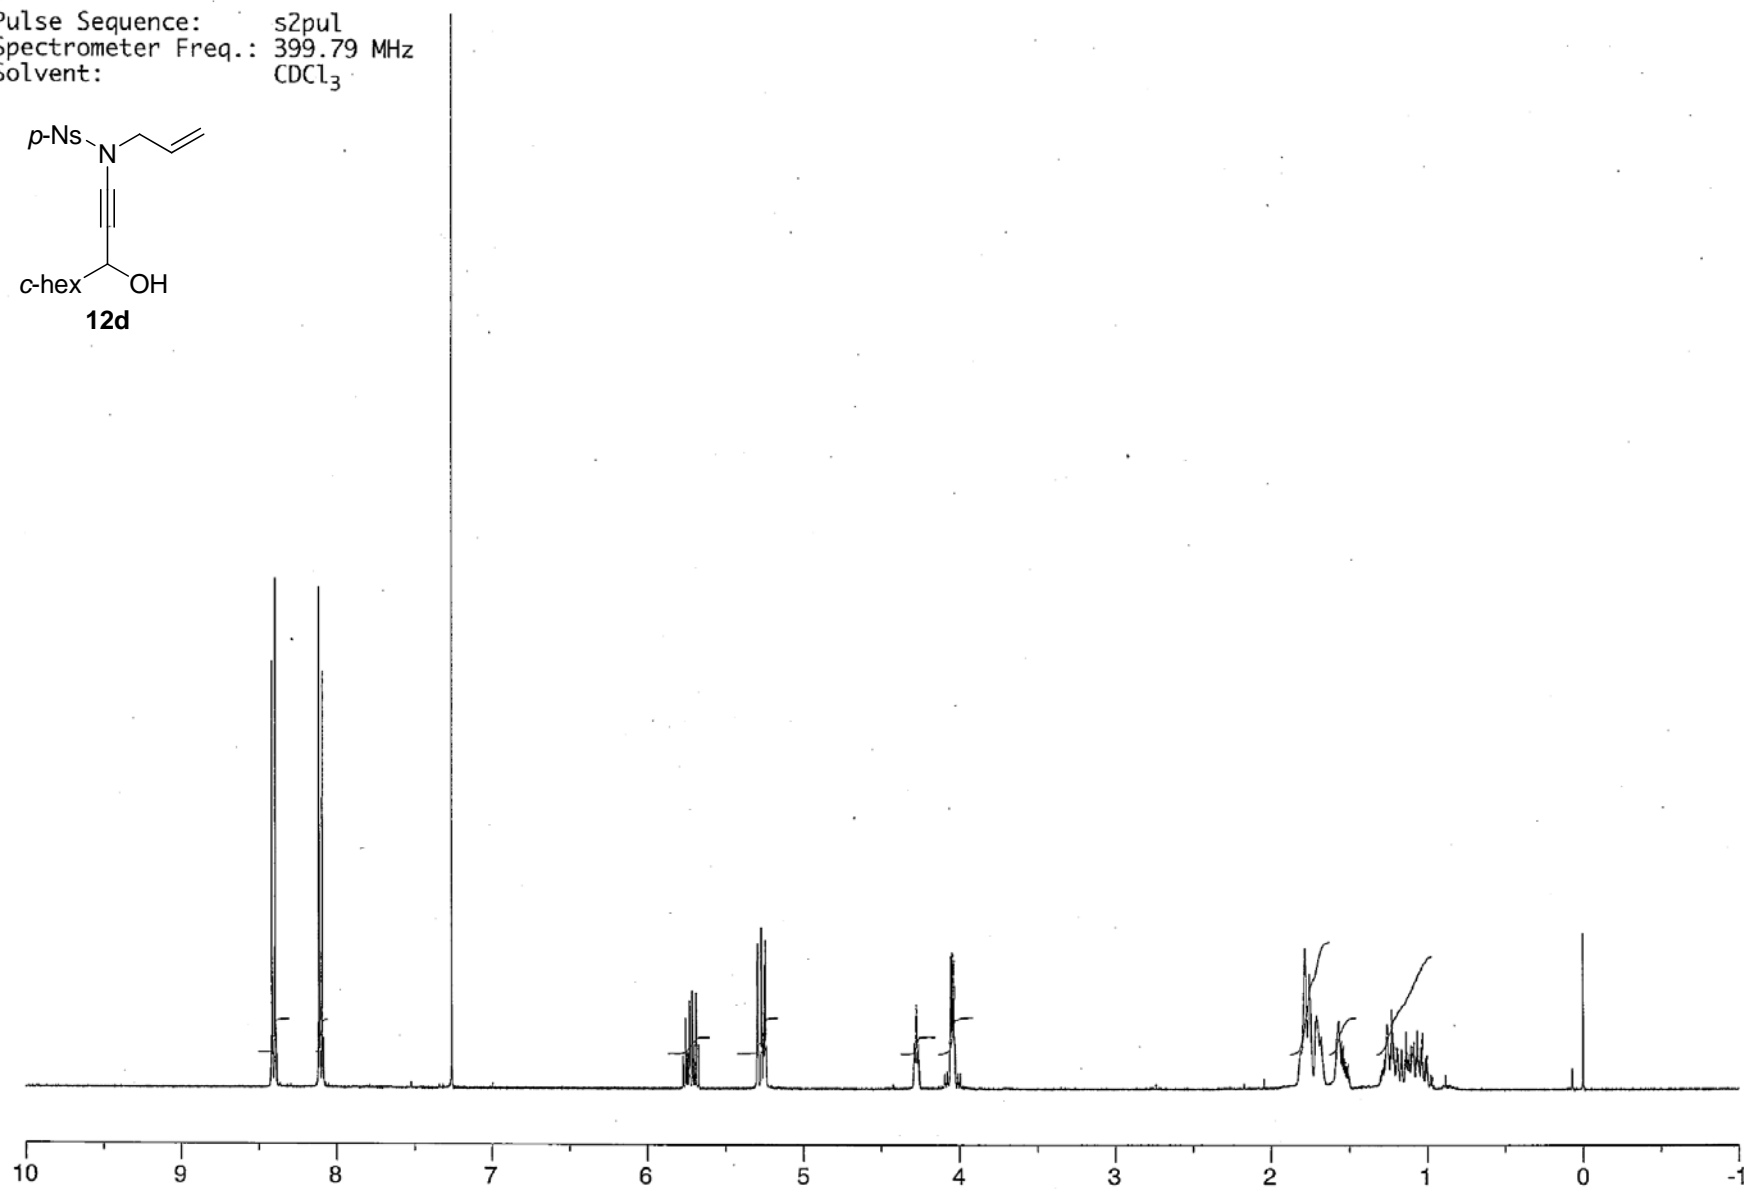



GWM-I-65\_26Jul2011

Pulse Sequence: s2pul

Spectrometer Freq.: 100.54 MHz

Solvent: CDCl<sub>3</sub>

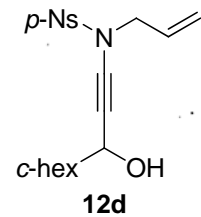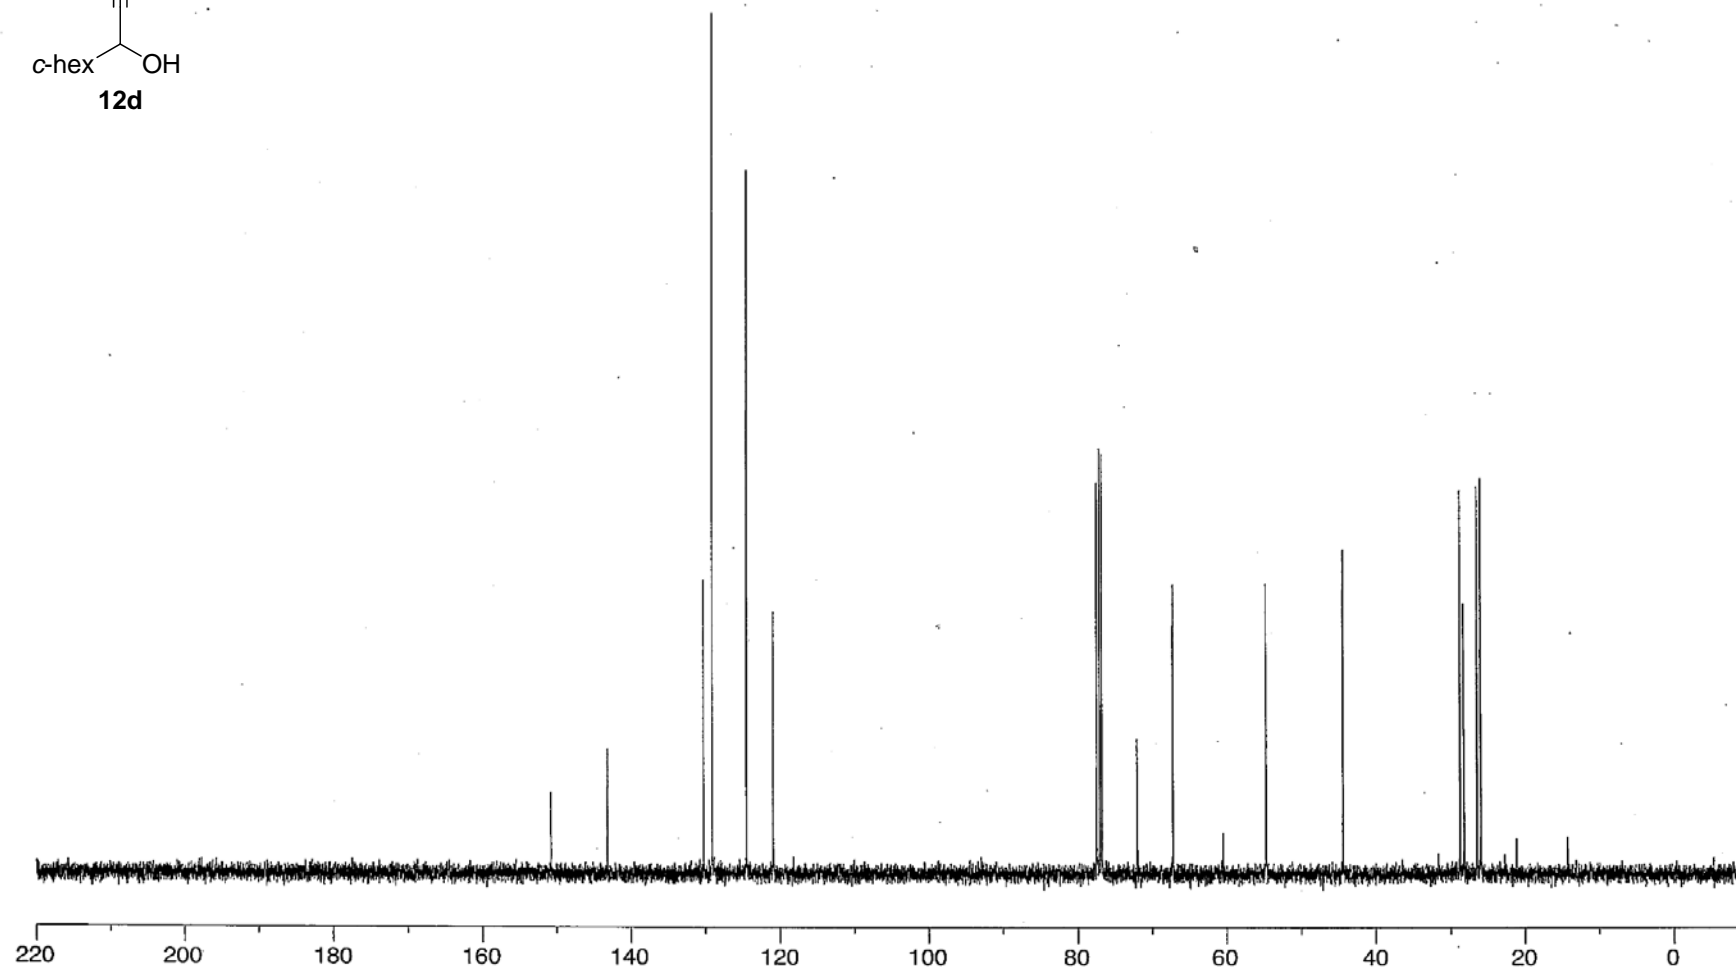

GWM-I-62\_20Jul2011

Pulse Sequence: s2pu1  
Spectrometer Freq.: 399.79 MHz  
Solvent: CDCl<sub>3</sub>

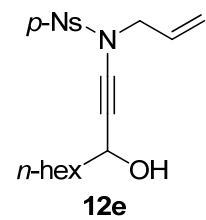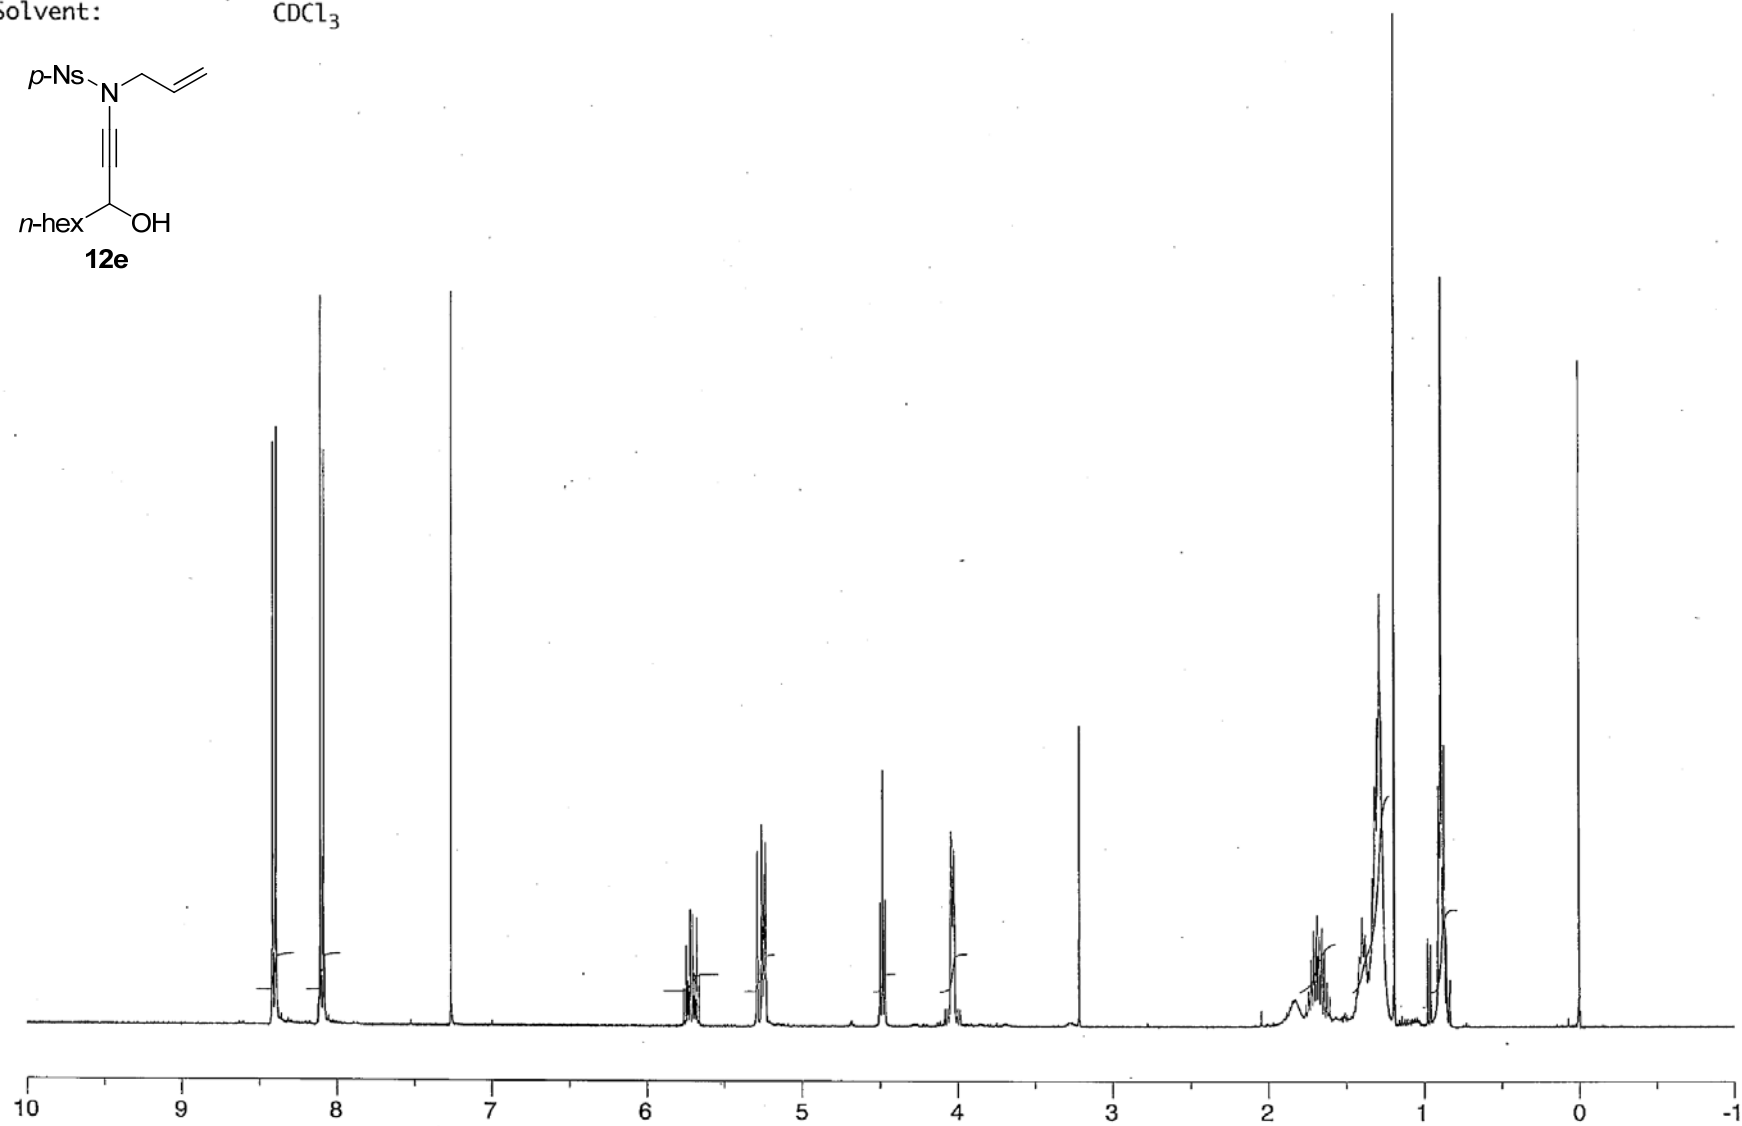

gwm-I-62\_15Jul2011

Pulse Sequence: s2pul  
Spectrometer Freq.: 100.54 MHz  
Solvent: CDCl<sub>3</sub>

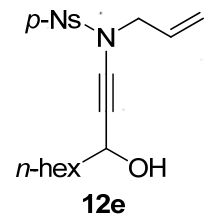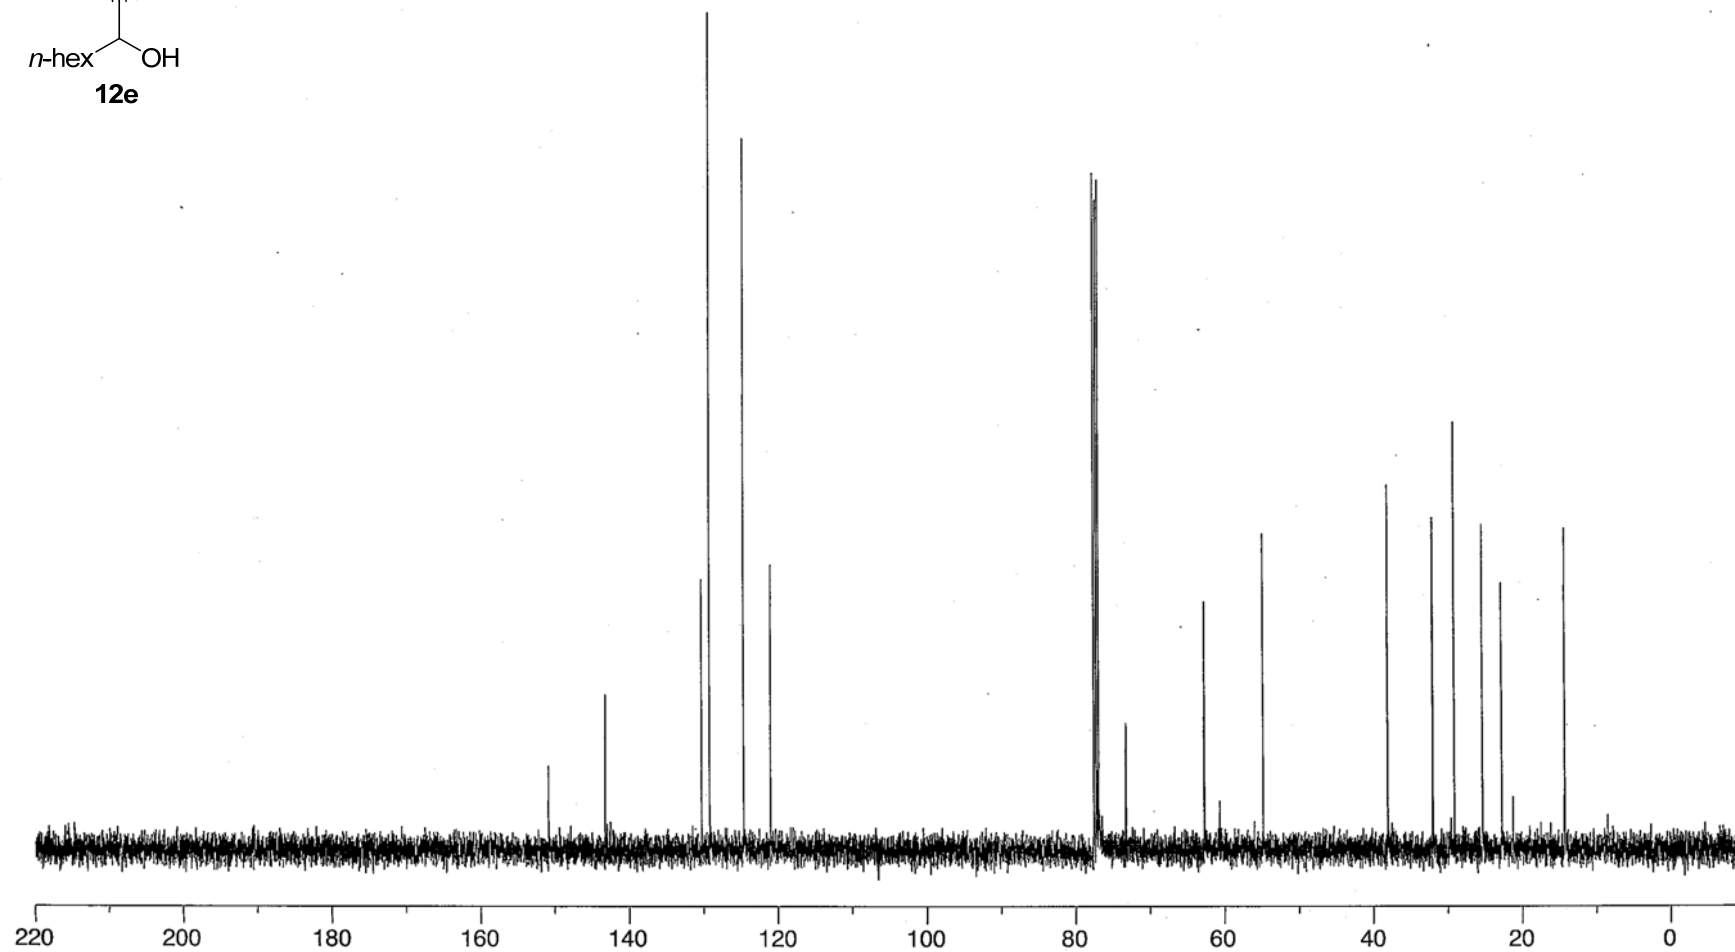

wxn21-1\_09Oct2011-14:31:40

Archive directory: /export/home/xiaona/vnmrsys/data  
Sample directory: wxn21-1\_09Oct2011-14:31:40

Pulse Sequence: s2pu1

Solvent: CDCl3  
Temp. 25.0 C / 298.1 K  
File: PROTON  
INOVA-500 "nmr03"

Relax. delay 1.000 sec  
Pulse 45.0 degrees  
Acq. time 3.754 sec  
Width 6387.7 Hz  
8 repetitions  
OBSERVE H1, 399.7865251 MHz  
DATA PROCESSING  
FT size 65536  
Total time 0 min, 57 sec

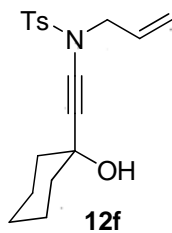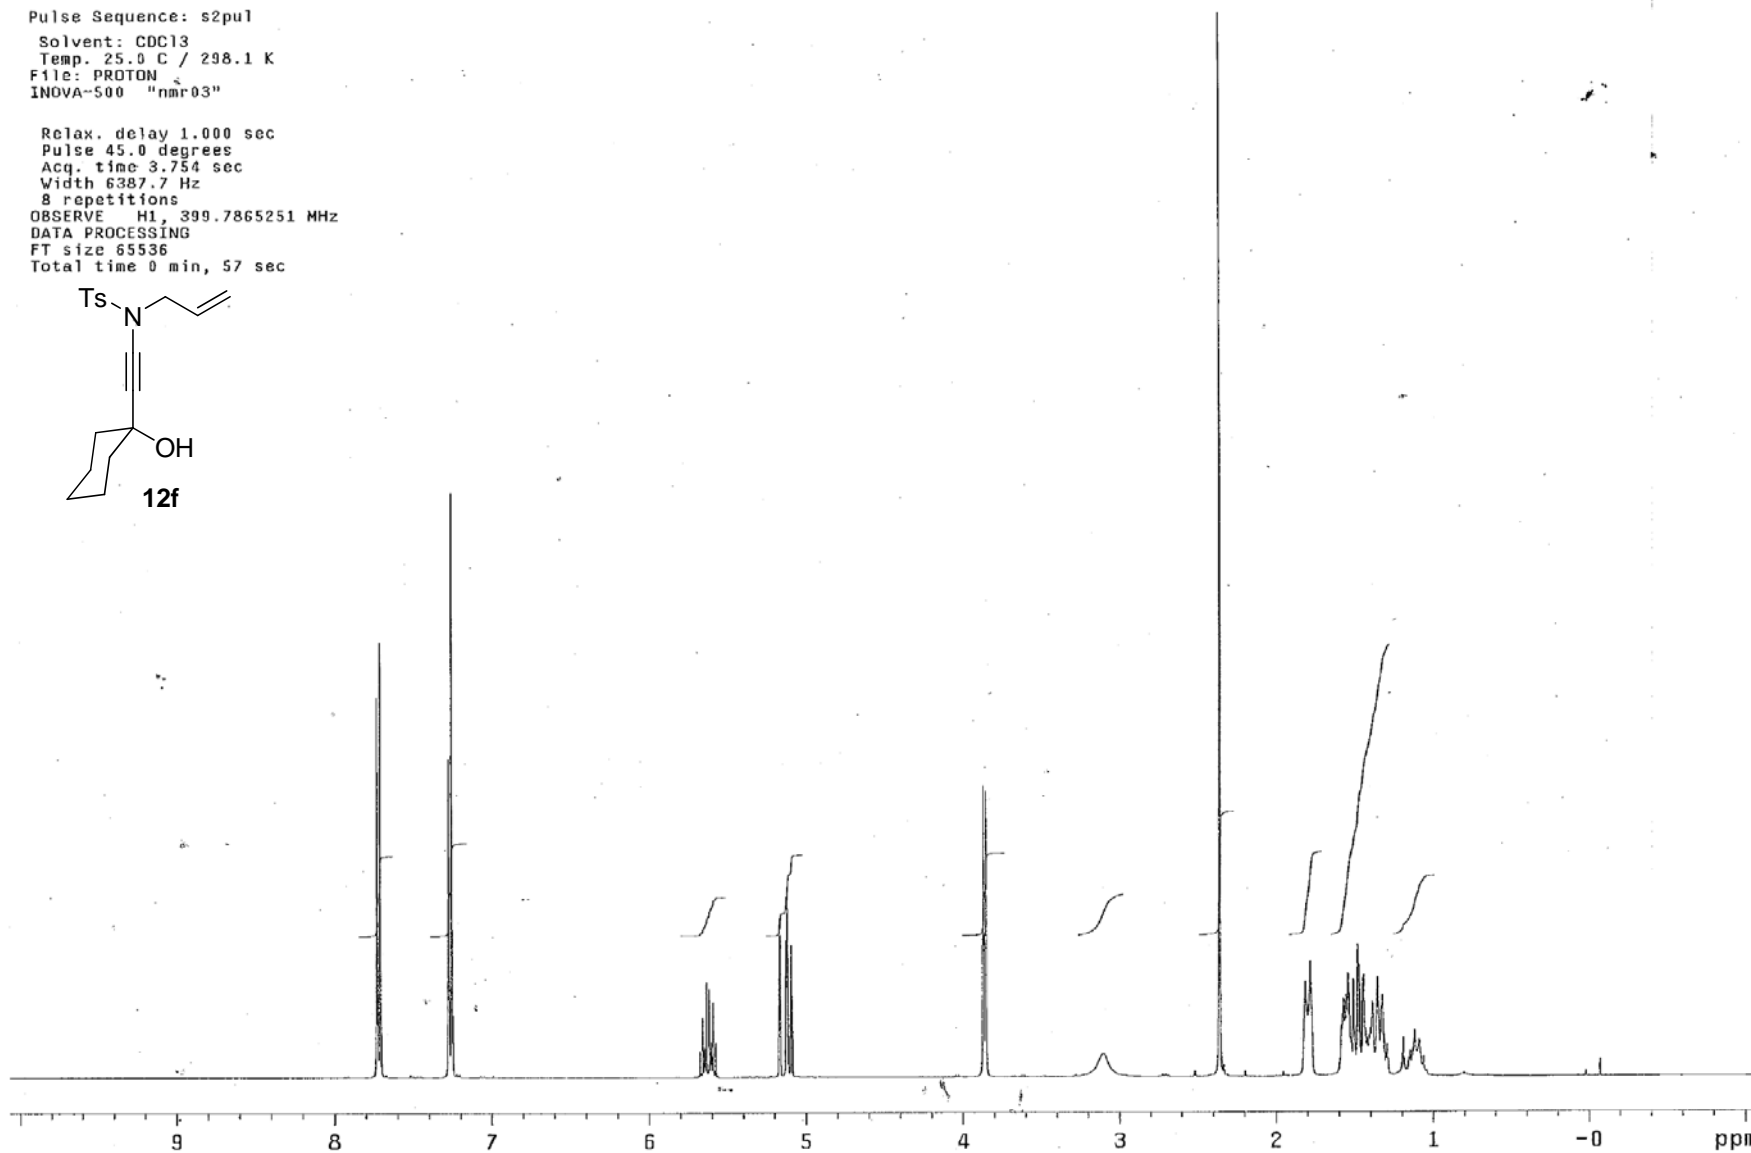

wxn21-1\_09Oct2011-14:31:40

Archive directory: /export/home/xiaona/vnmrsys/data  
Sample directory: wxn21-1\_09Oct2011-14:31:40

Pulse Sequence: s2pu1

Solvent: CDCl3  
Temp. 25.0 C / 298.1 K  
File: CARBON  
INOVA-500 "nmr03"

Relax. delay 1.000 sec  
Pulse 45.0 degrees  
Acq. time 1.197 sec  
Width 25157.2 Hz  
54 repetitions  
OBSERVE C13, 100.5264253 MHz  
DECOUPLE H1, 399.7885243 MHz  
Power 41 dB  
continuously on  
WALTZ-16 modulated  
DATA PROCESSING  
Line broadening 0.8 Hz  
FT size 65536  
Total time 9 min, 24 sec

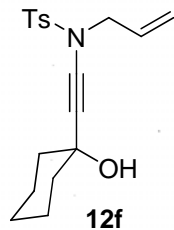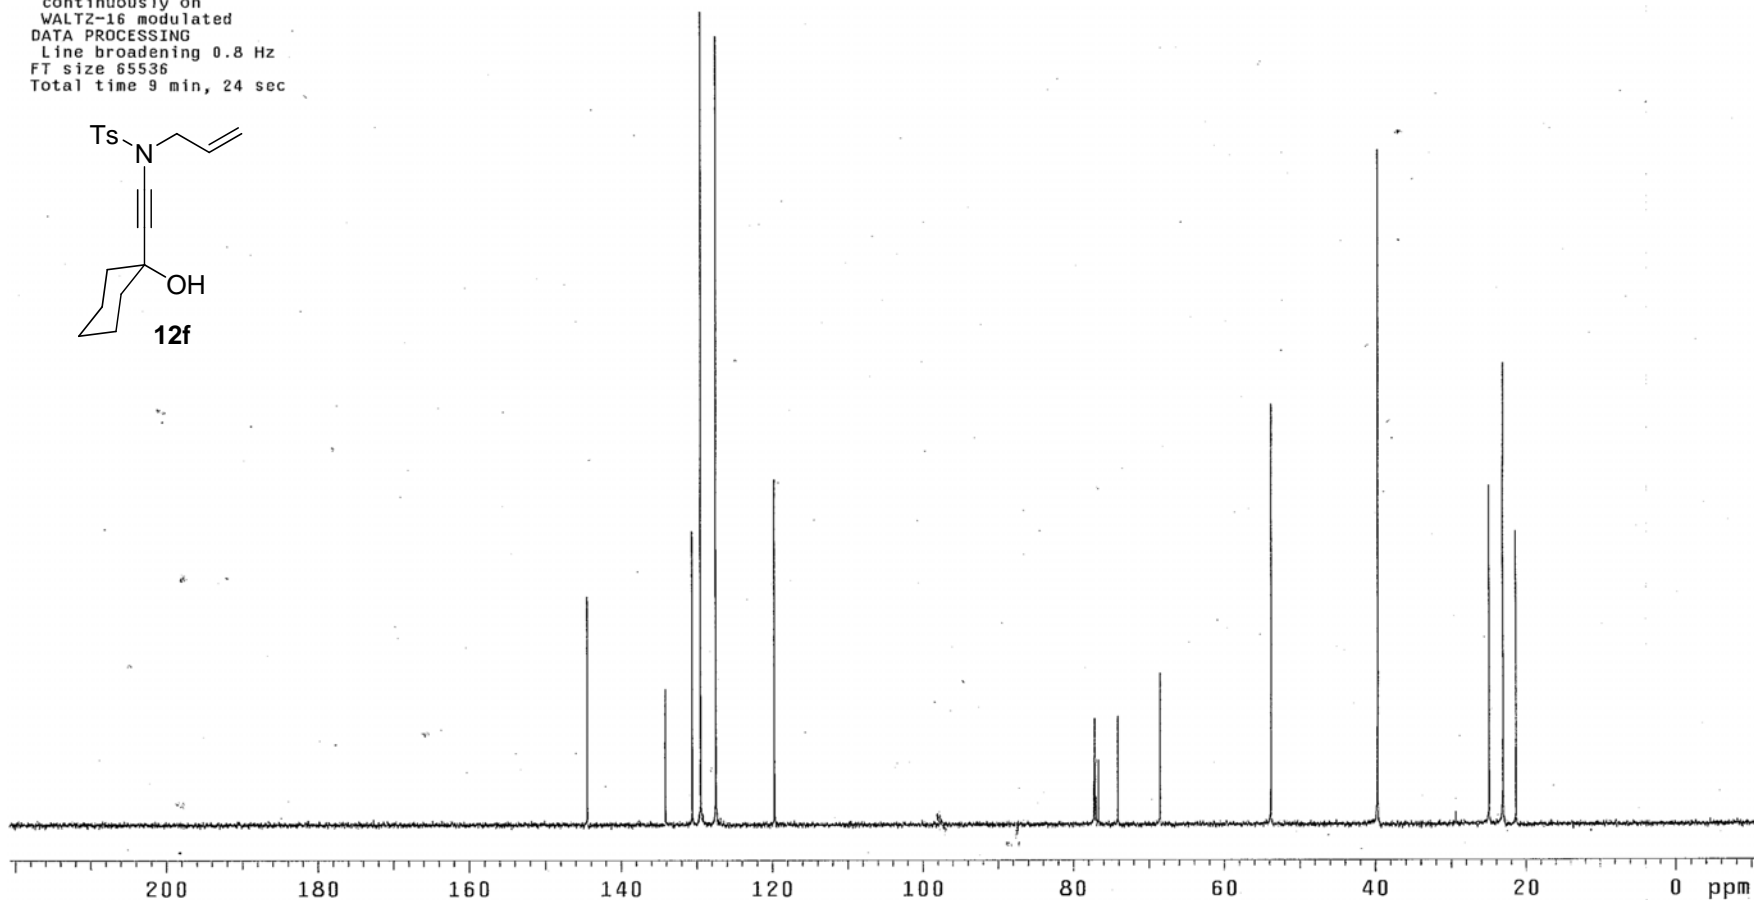

MW-1-129\_02Aug2011

Pulse Sequence: s2pul  
Spectrometer Freq.: 399.79 MHz  
Solvent: CDCl<sub>3</sub>

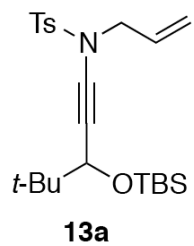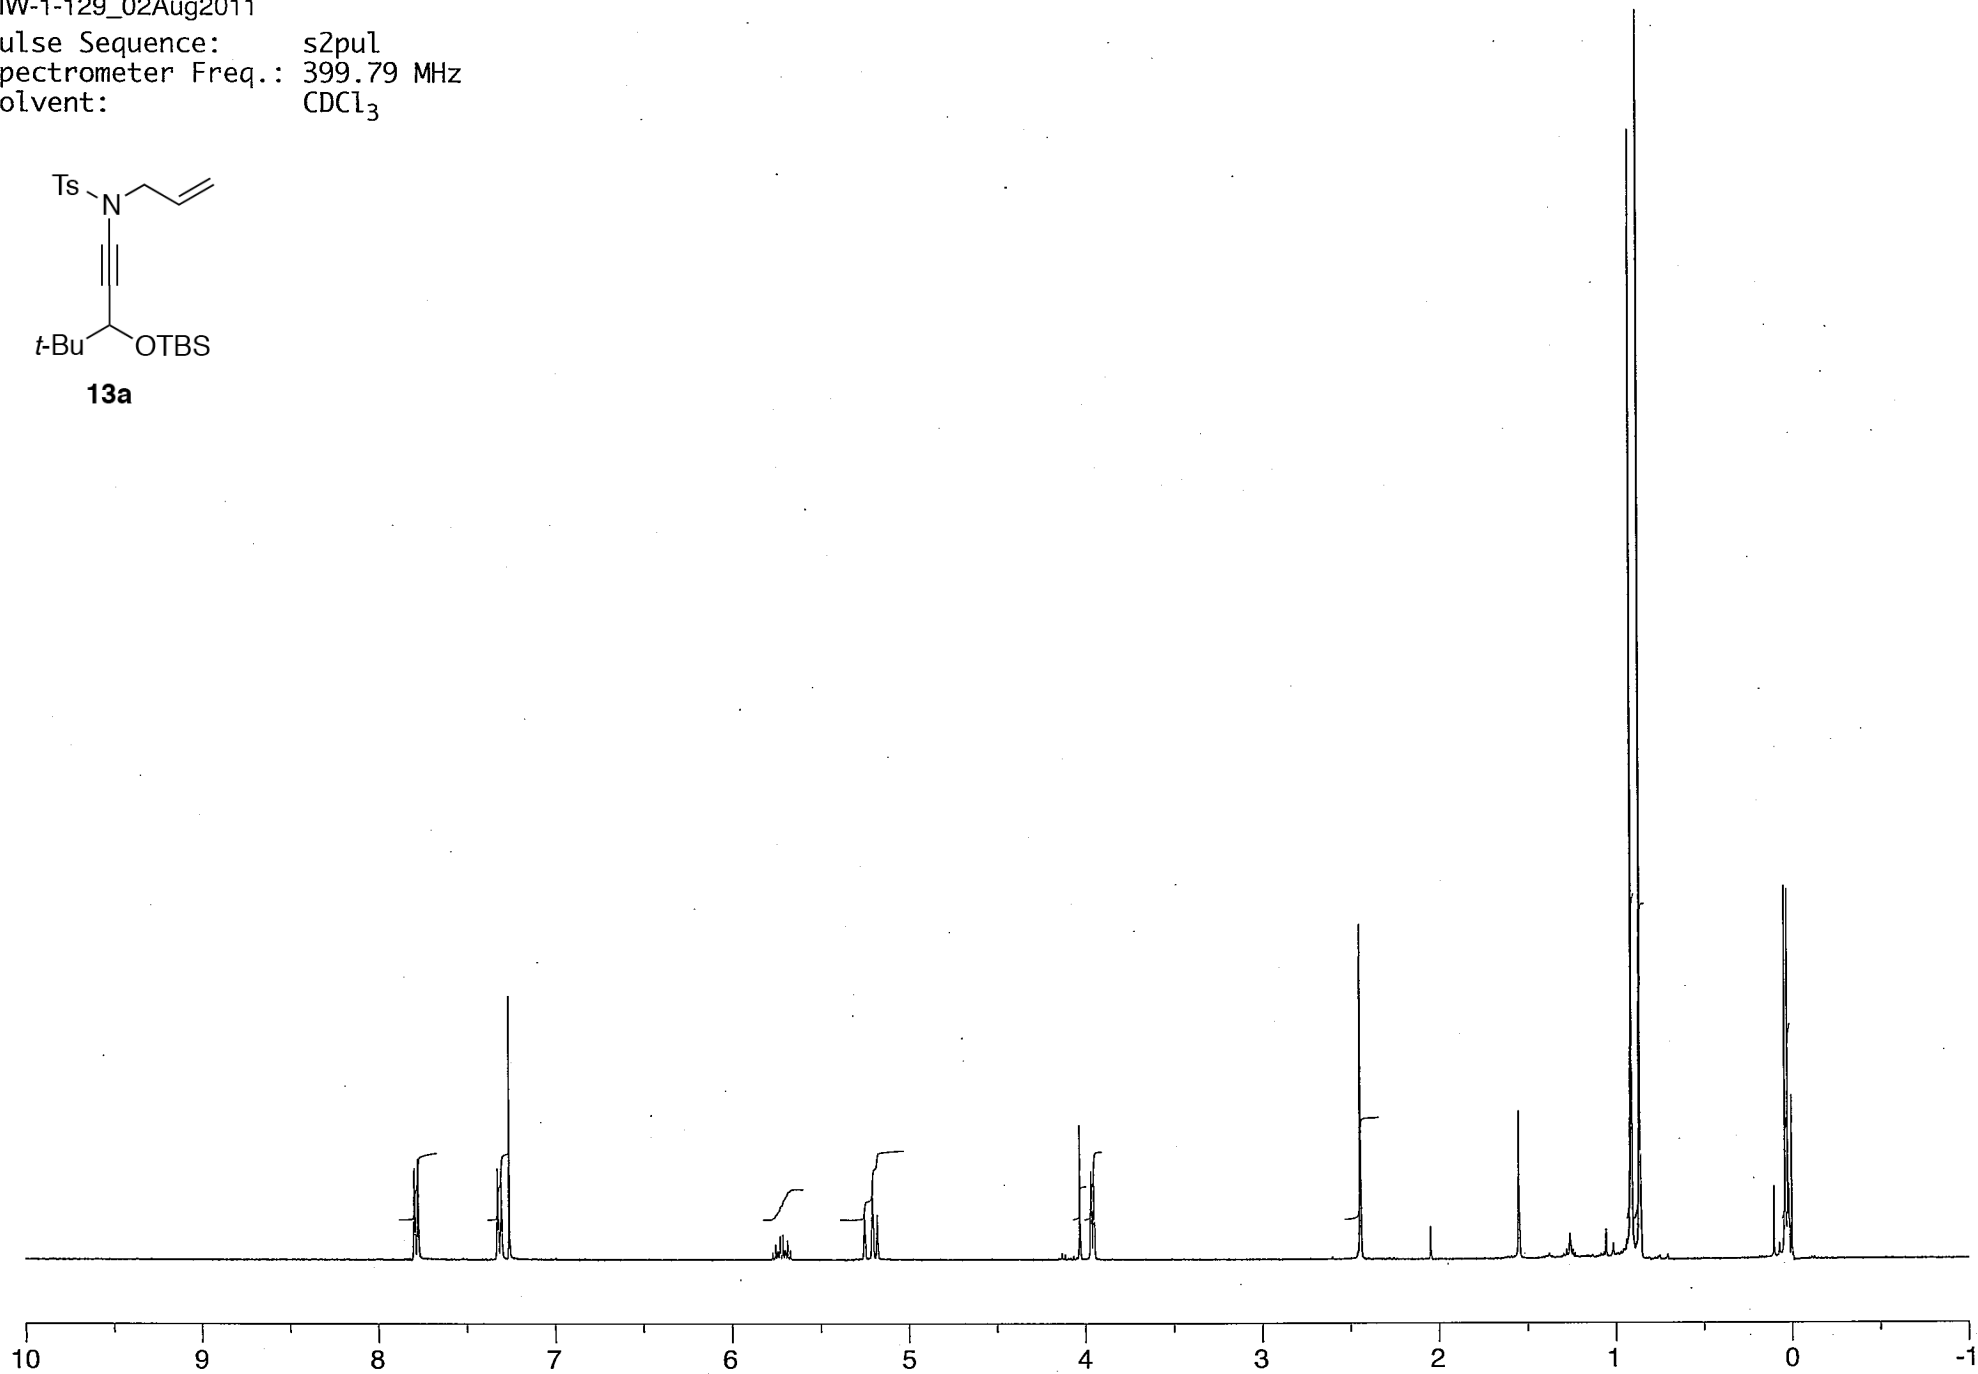

Pulse Sequence: s2pul  
Spectrometer Freq.: 100.54 MHz  
Solvent: CDCl<sub>3</sub>

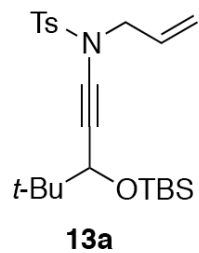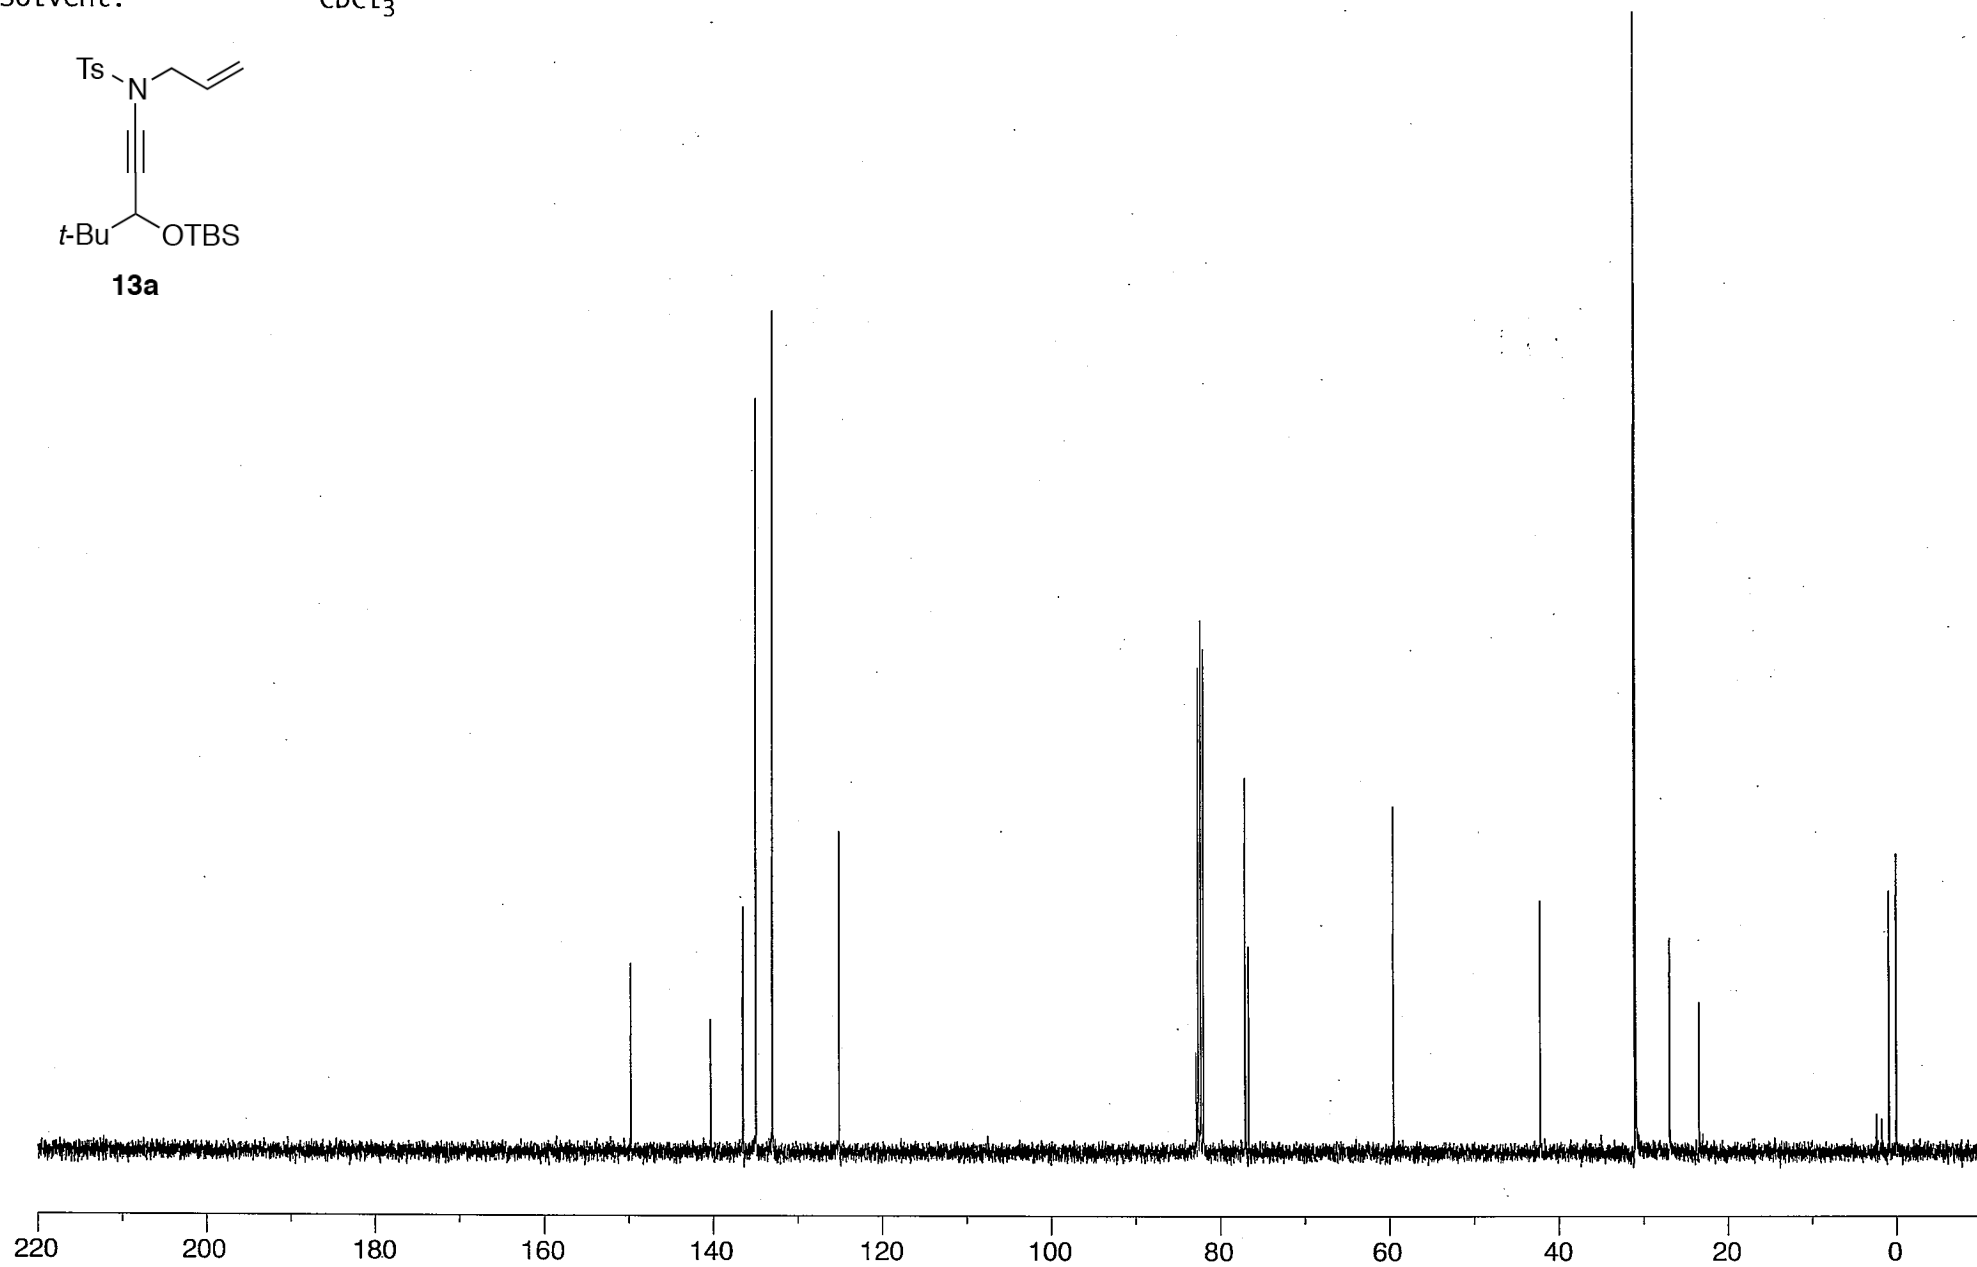

KAD-03-202A\_14Oct2011

Pulse Sequence: s2pul  
Spectrometer Freq.: 499.73 MHz  
Solvent: CDCl<sub>3</sub>

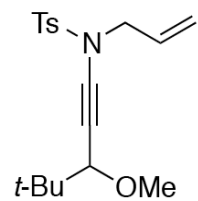

**13b**

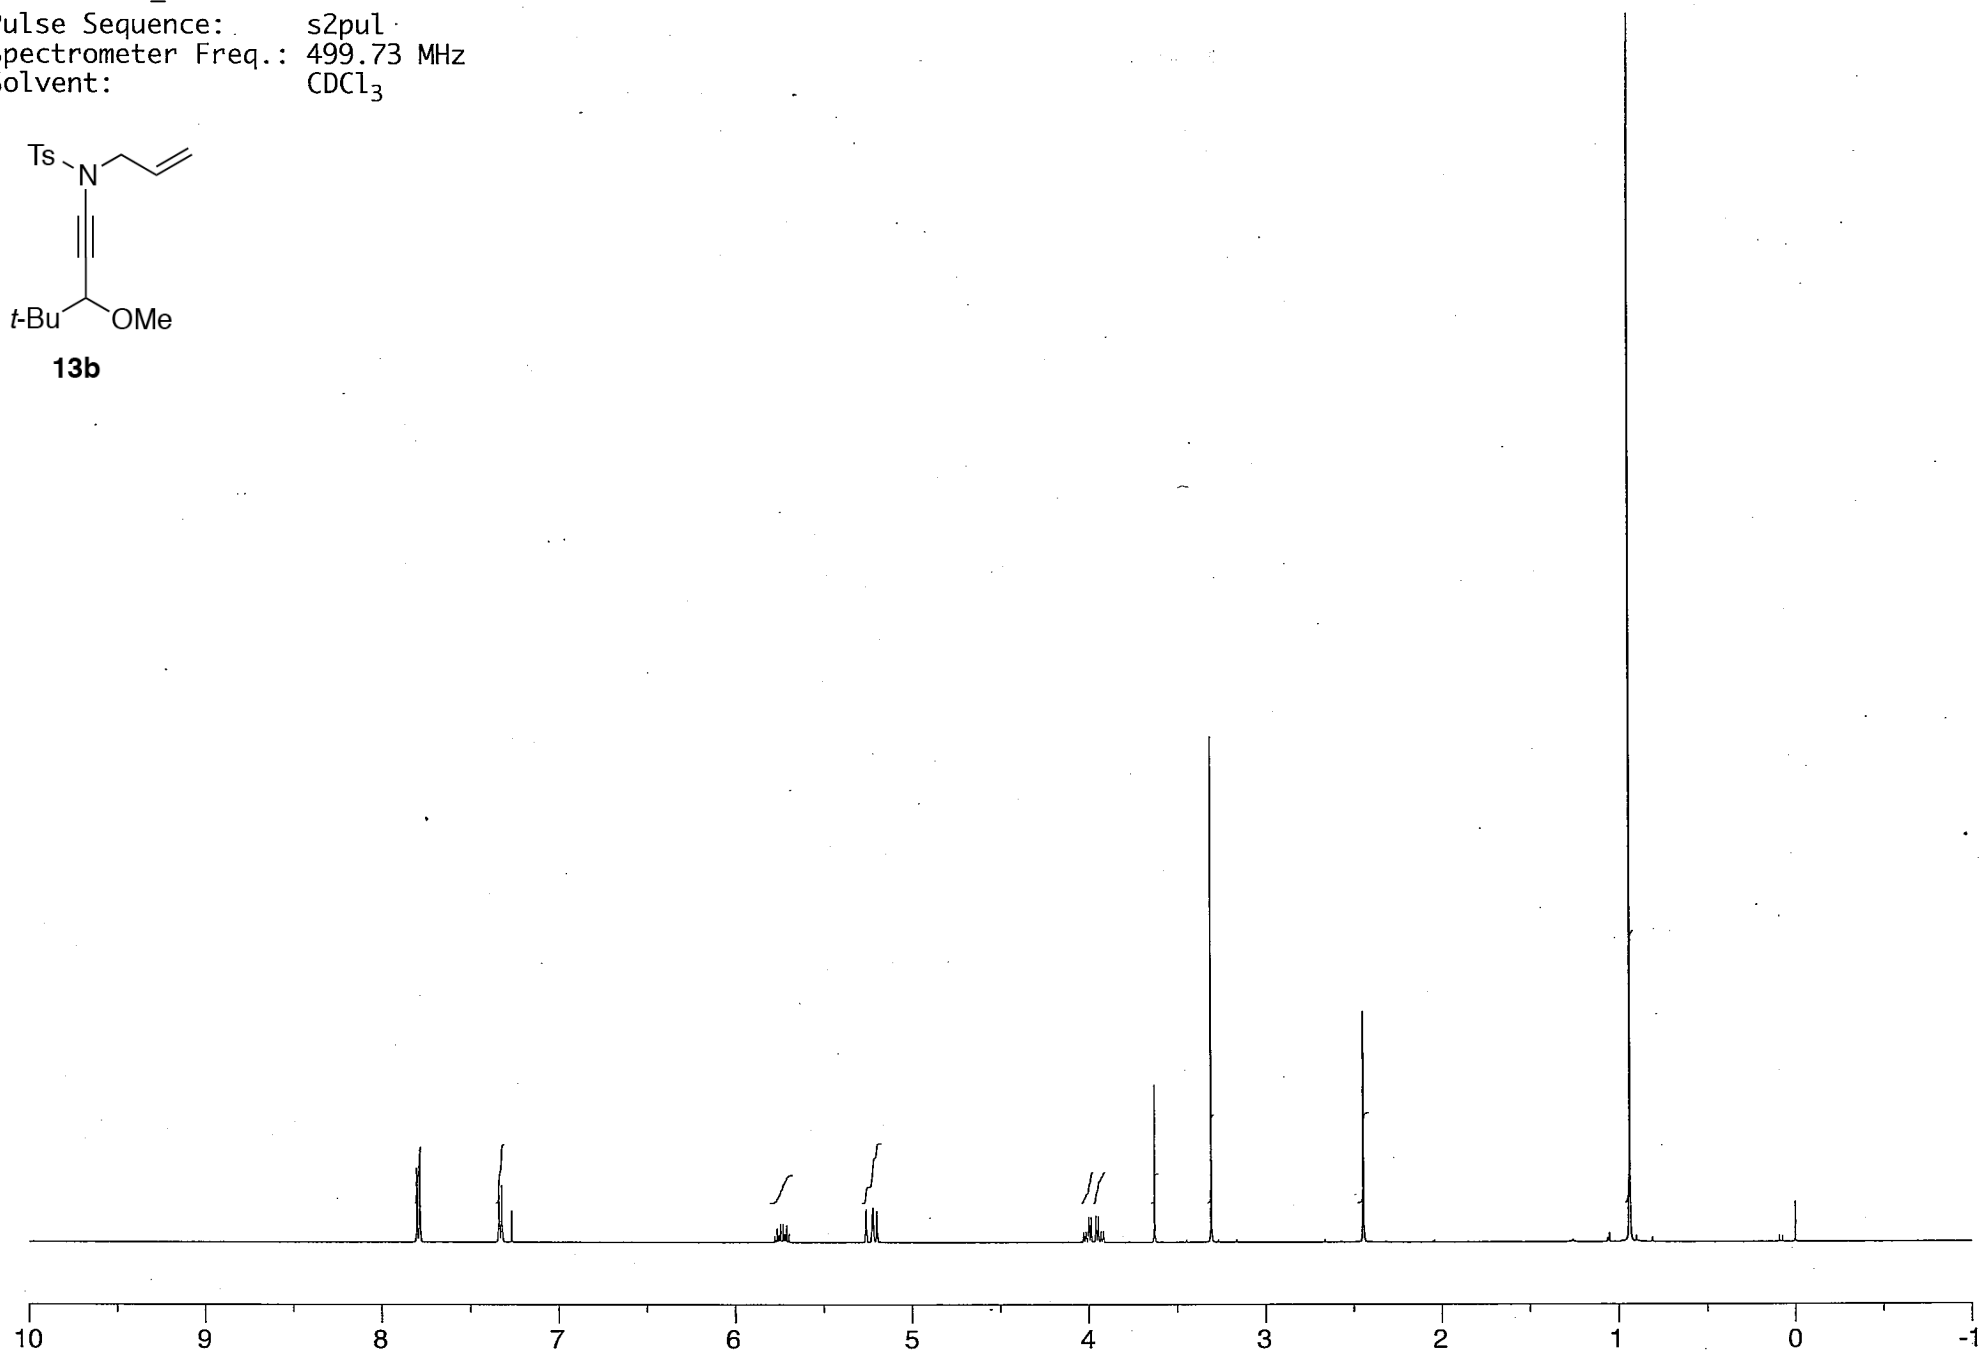



Pulse Sequence: s2pul  
Spectrometer Freq.: 125.67 MHz  
Solvent: CDCl<sub>3</sub>

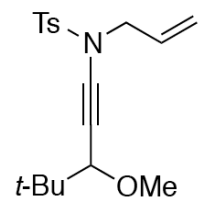**13b**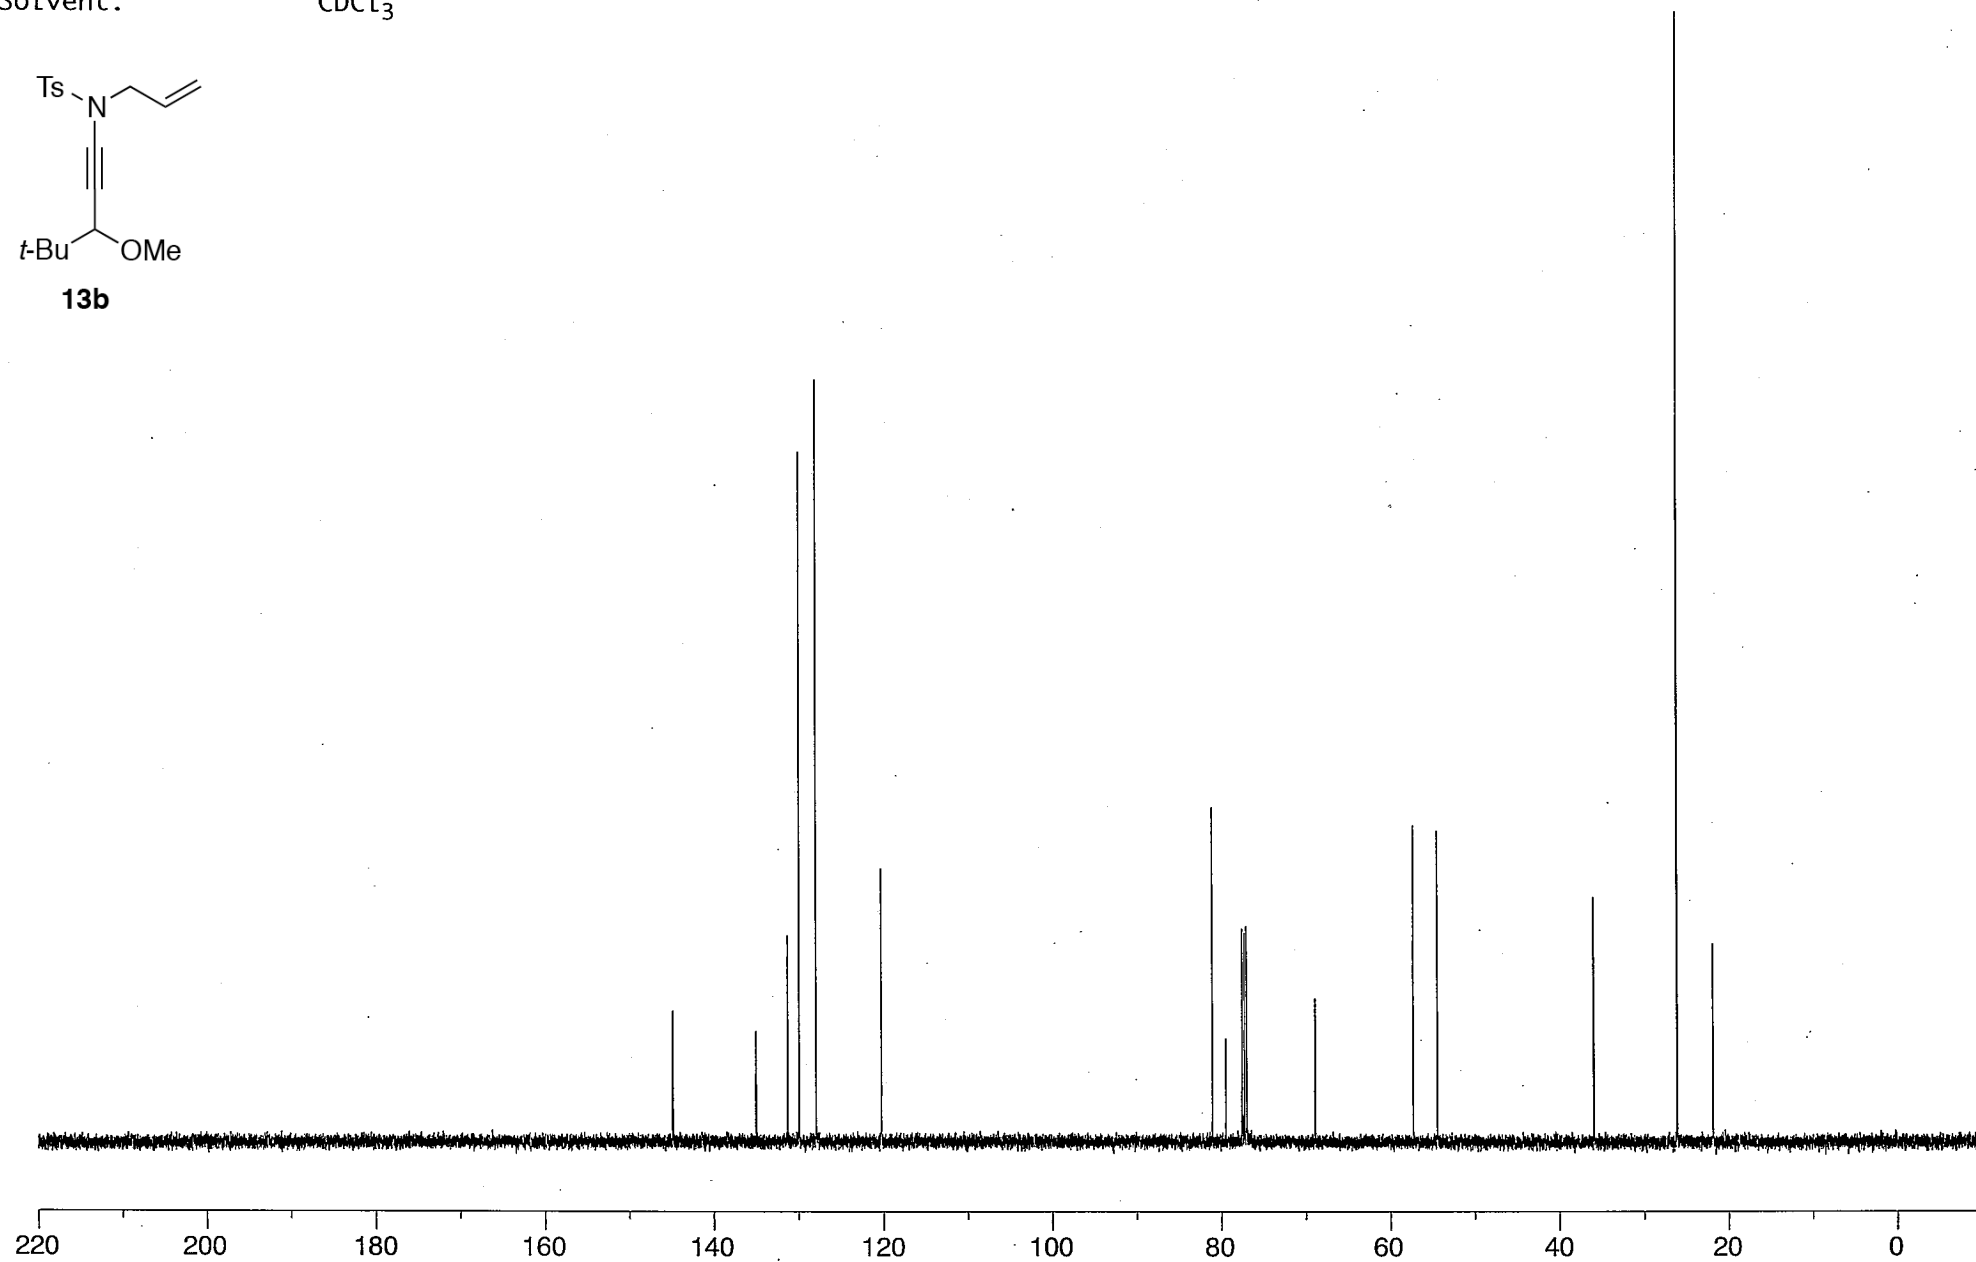

KAD-03-202B\_14Oct2011

Pulse Sequence: s2pu1  
Spectrometer Freq.: 499.73 MHz  
Solvent: CDCl<sub>3</sub>

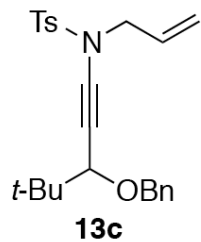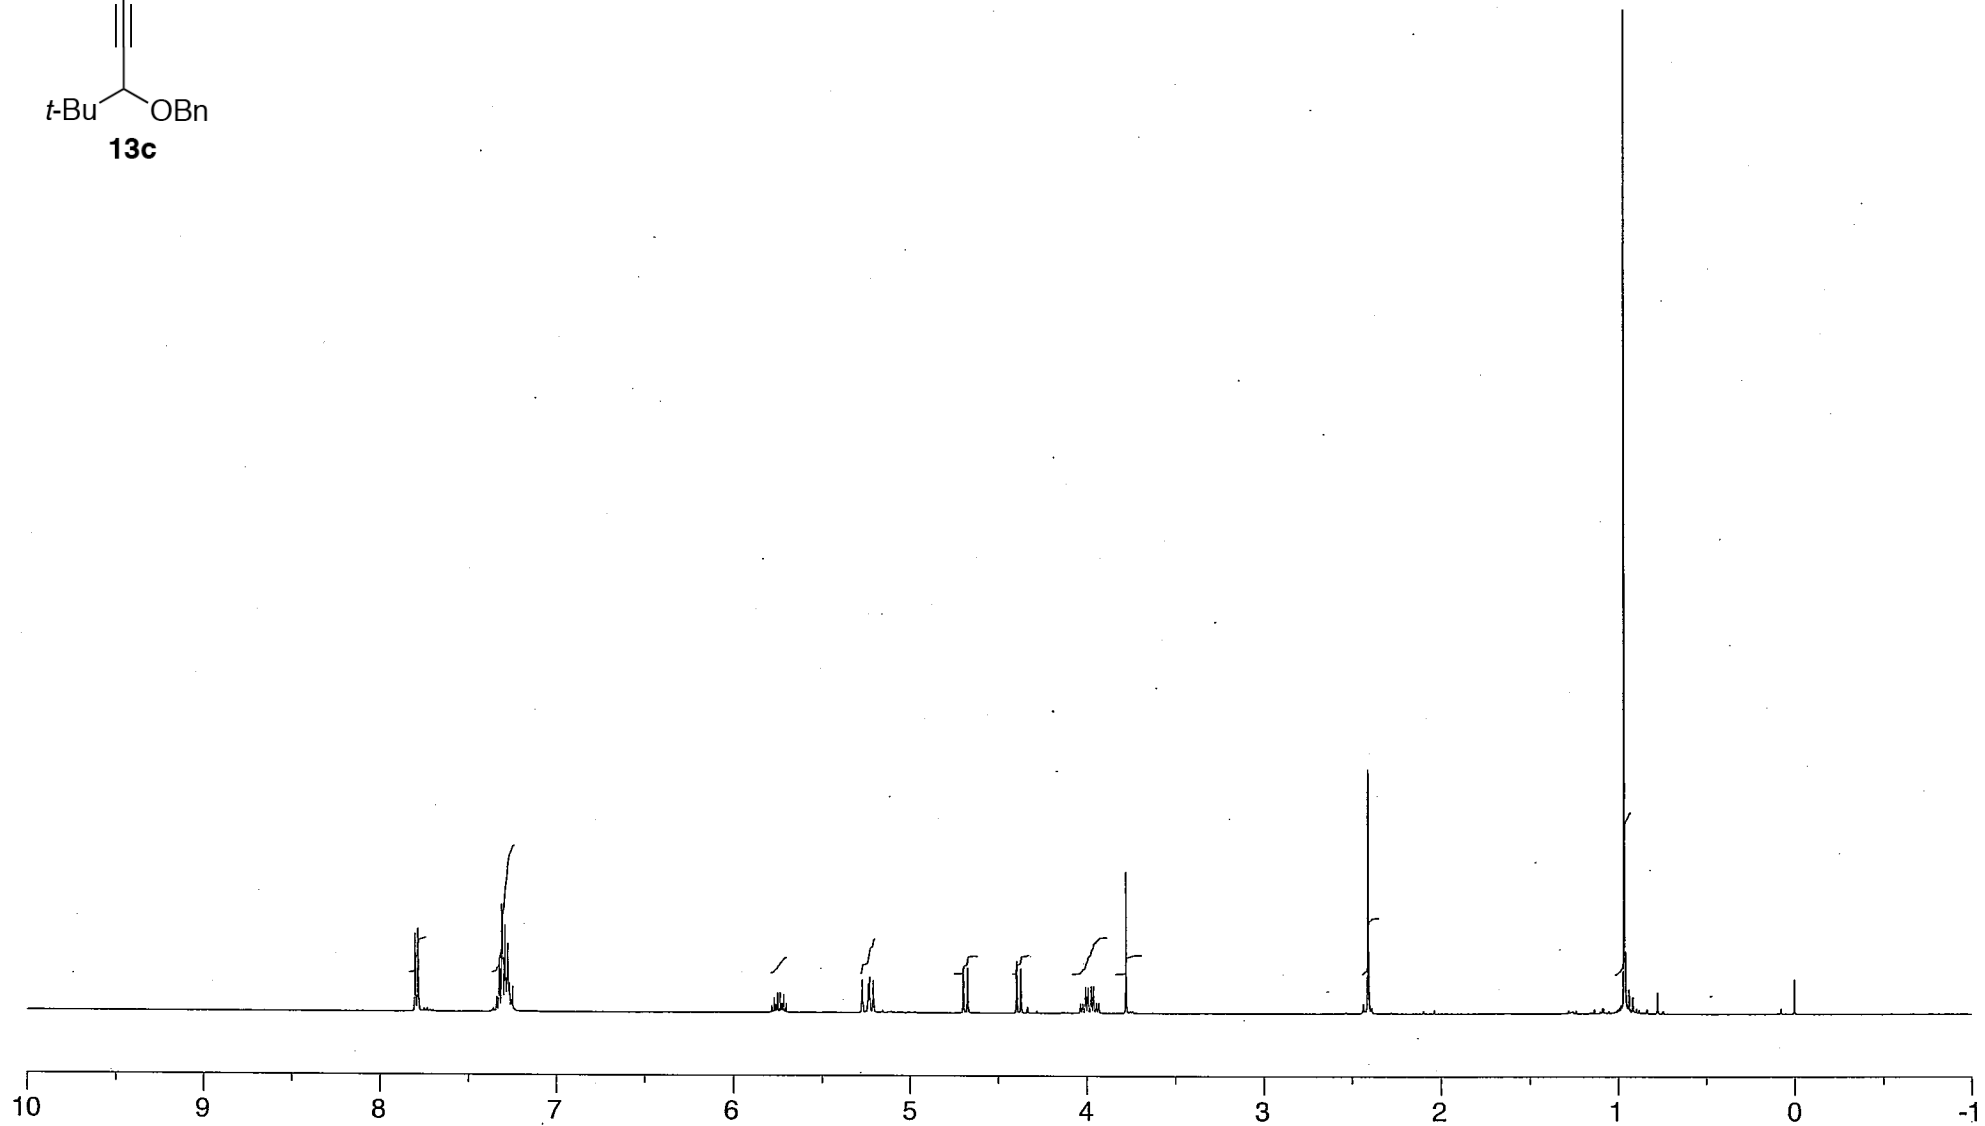

KAD-03-202B\_14Oct2011

Pulse Sequence: s2pu1  
Spectrometer Freq.: 125.67 MHz  
Solvent: CDCl<sub>3</sub>

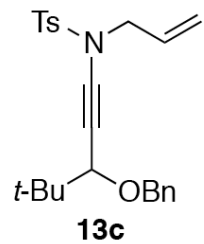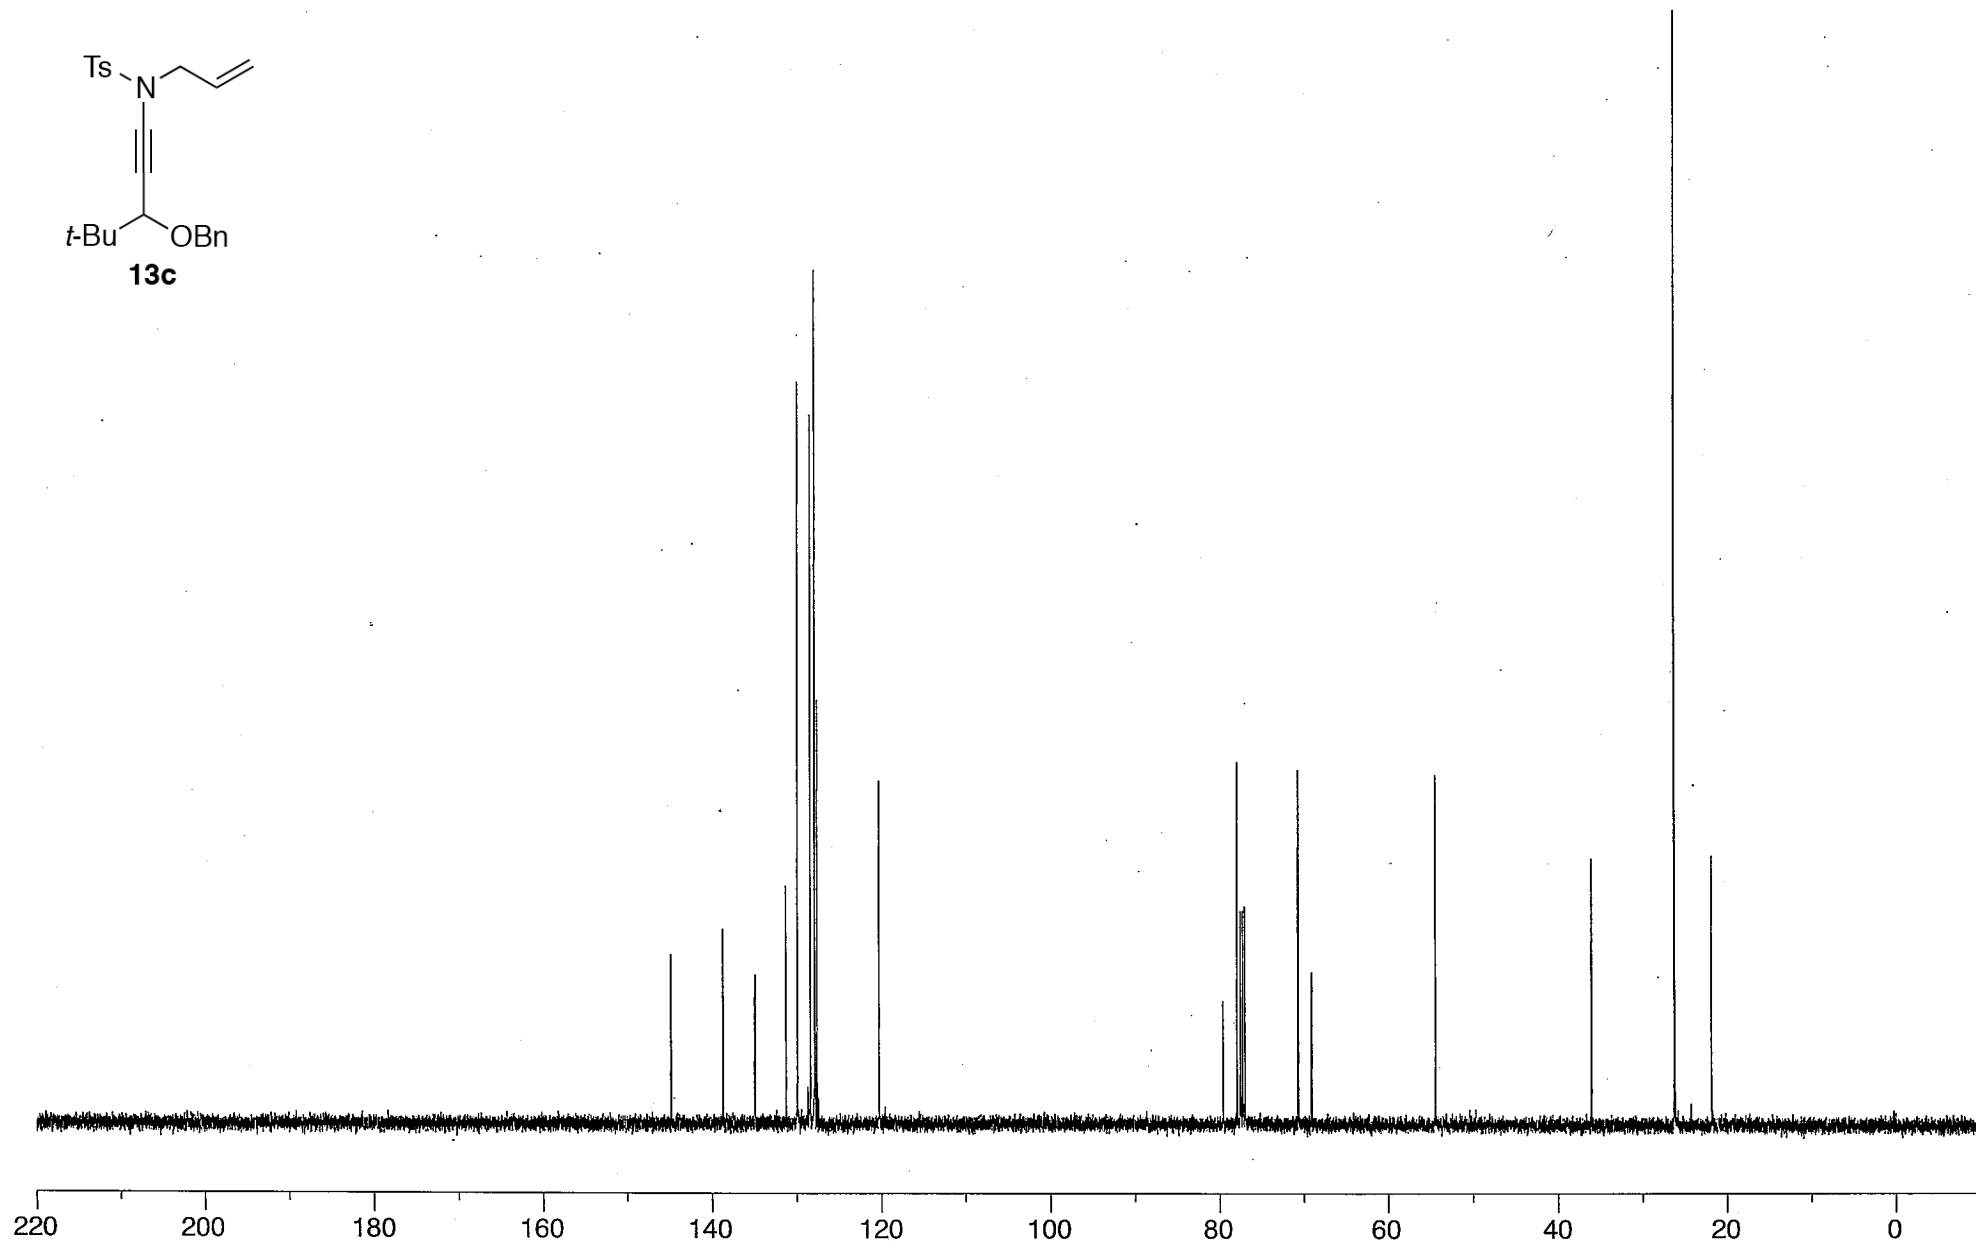

Pulse Sequence: s2pu1  
Spectrometer Freq.: 399.79 MHz  
Solvent: CDCl<sub>3</sub>

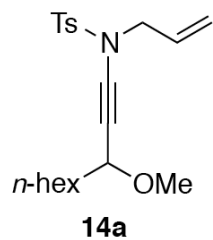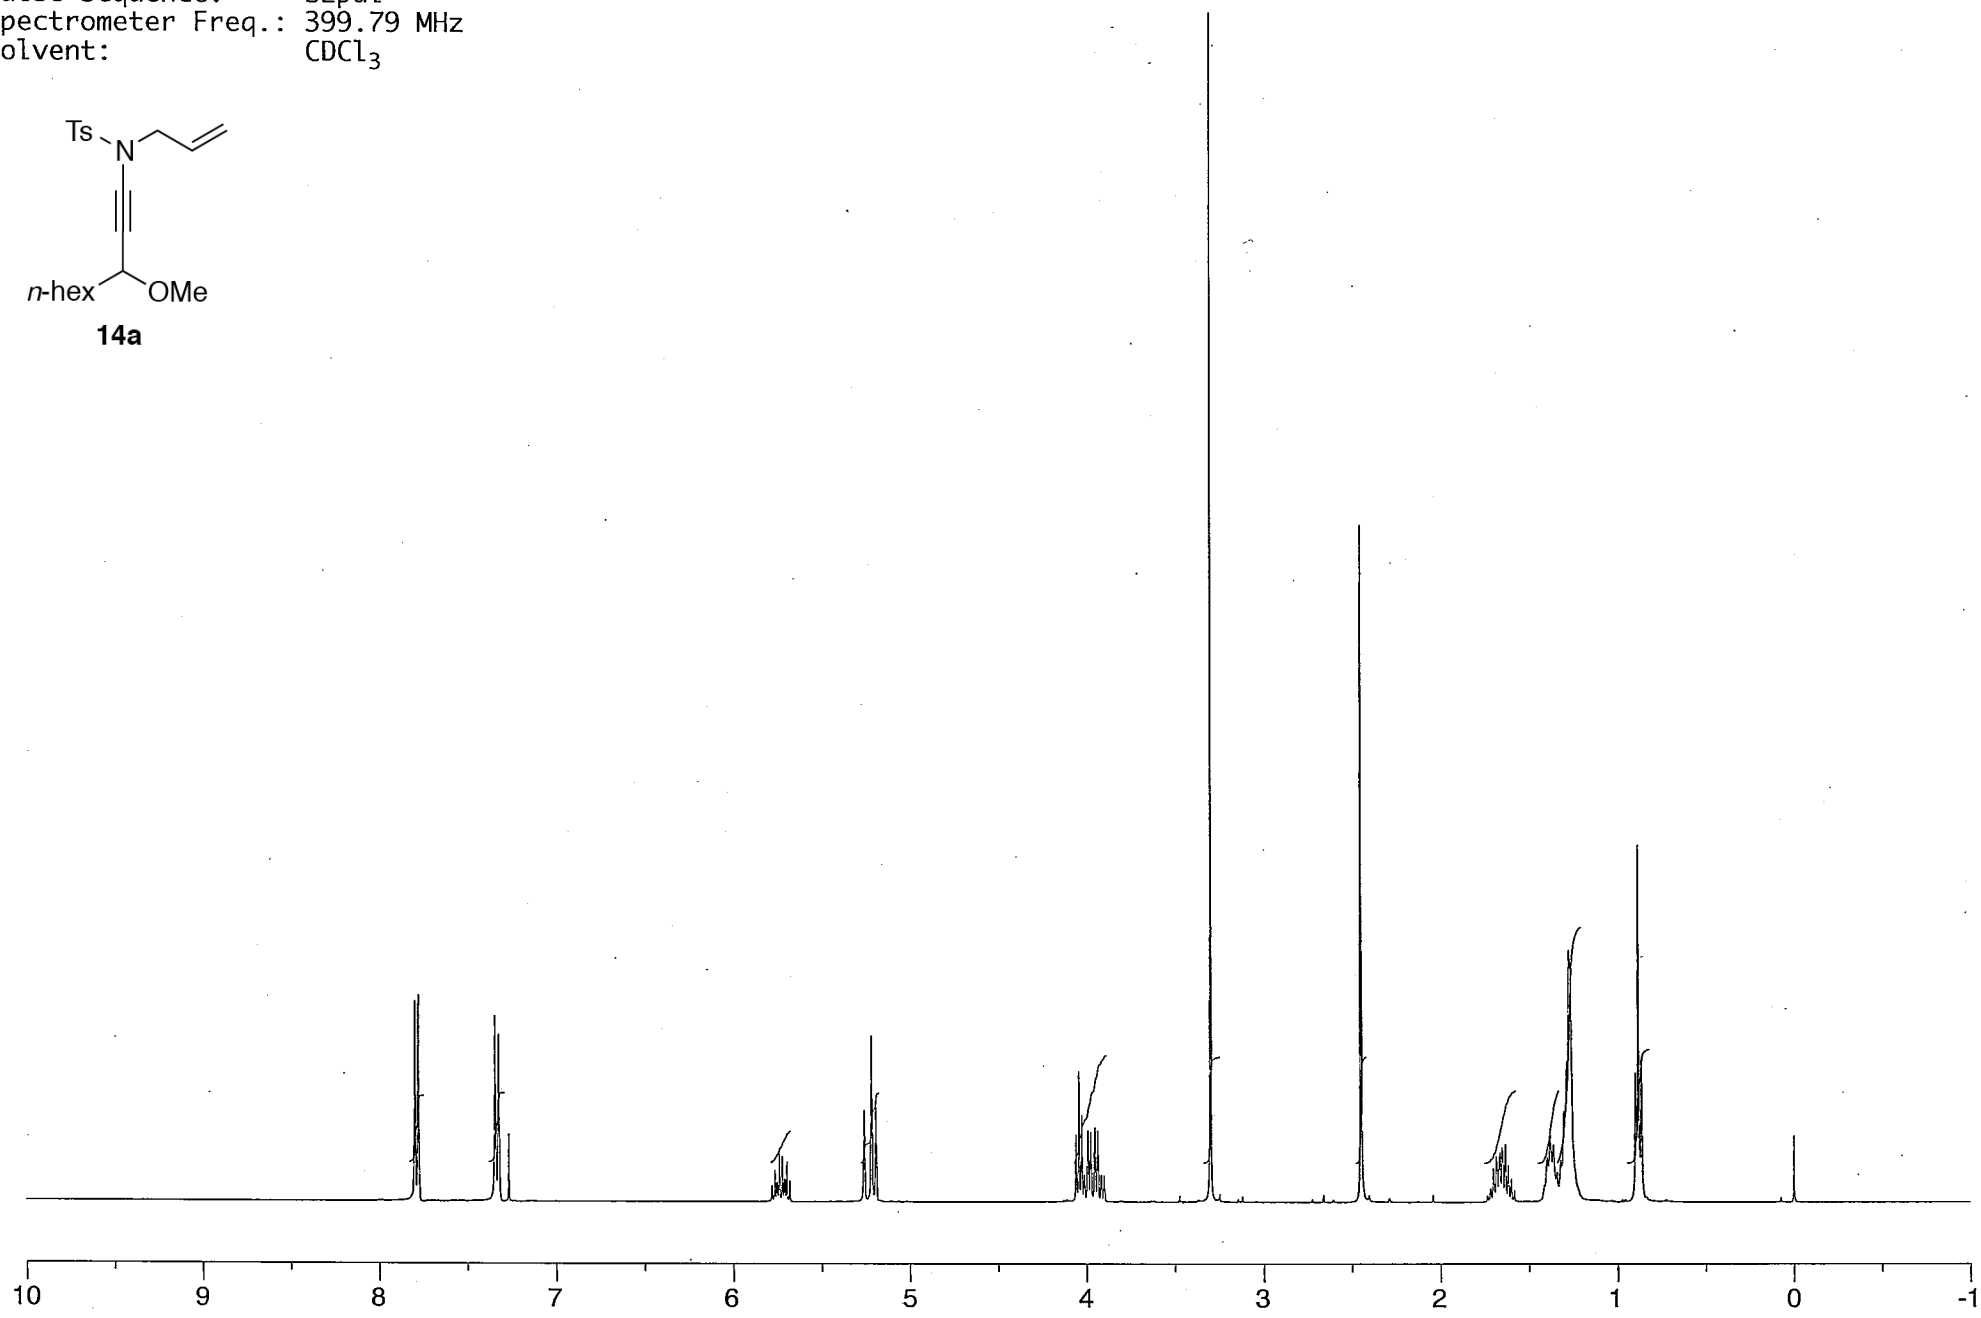

Pulse Sequence: s2pul  
Spectrometer Freq.: 100.54 MHz  
Solvent: CDCl<sub>3</sub>

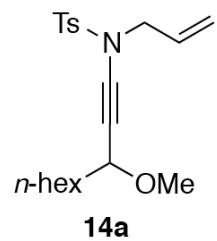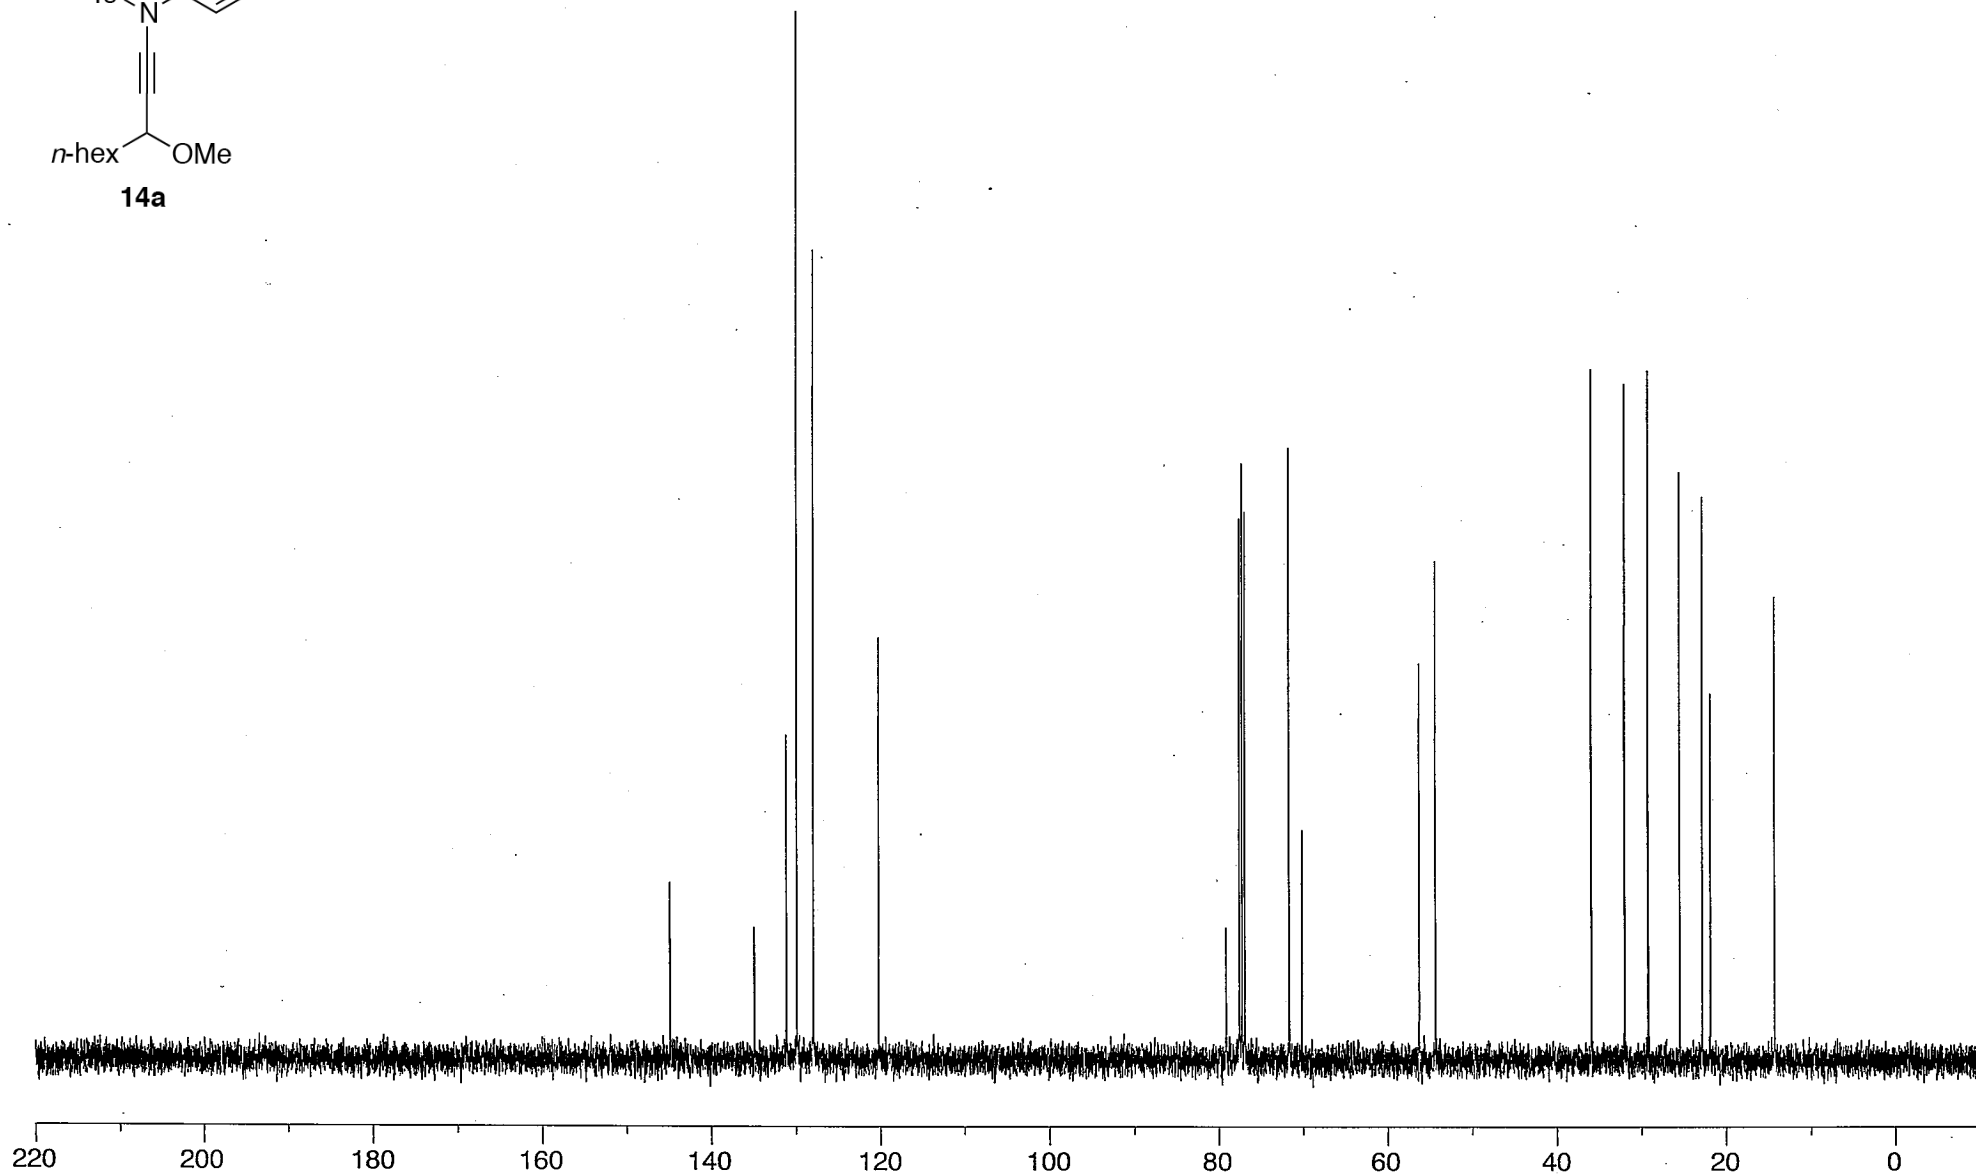

Pulse Sequence: s2pul  
Spectrometer Freq.: 499.73 MHz  
Solvent: CDCl<sub>3</sub>

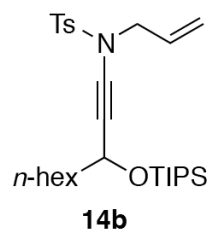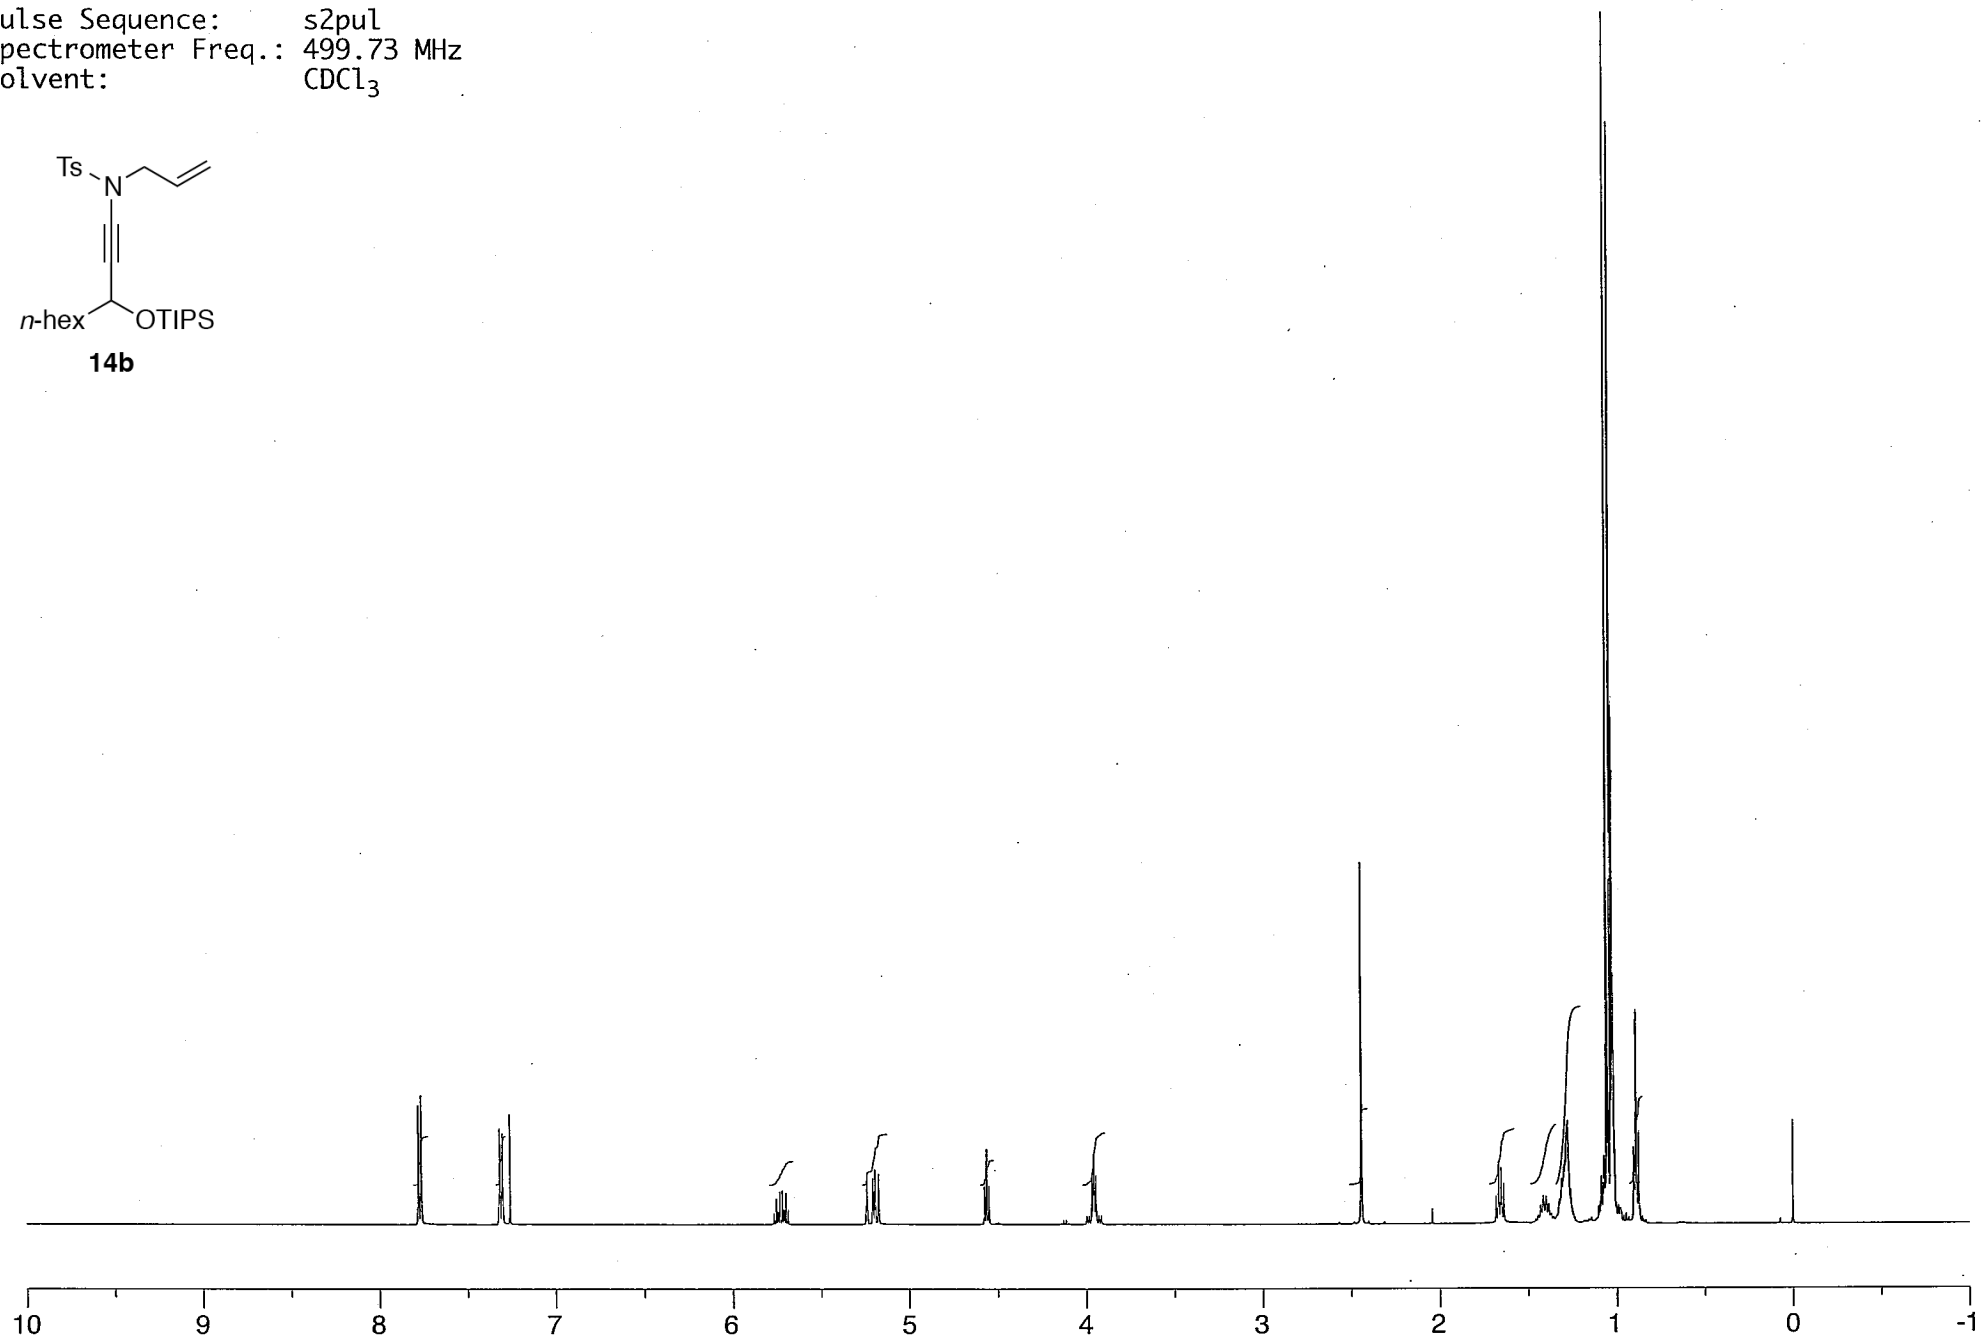

KAD-03-190A\_03Oct2011

Pulse Sequence: s2pul  
Spectrometer Freq.: 125.67 MHz  
Solvent: CDCl<sub>3</sub>

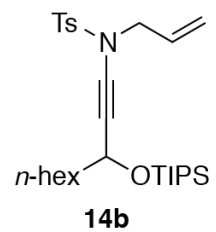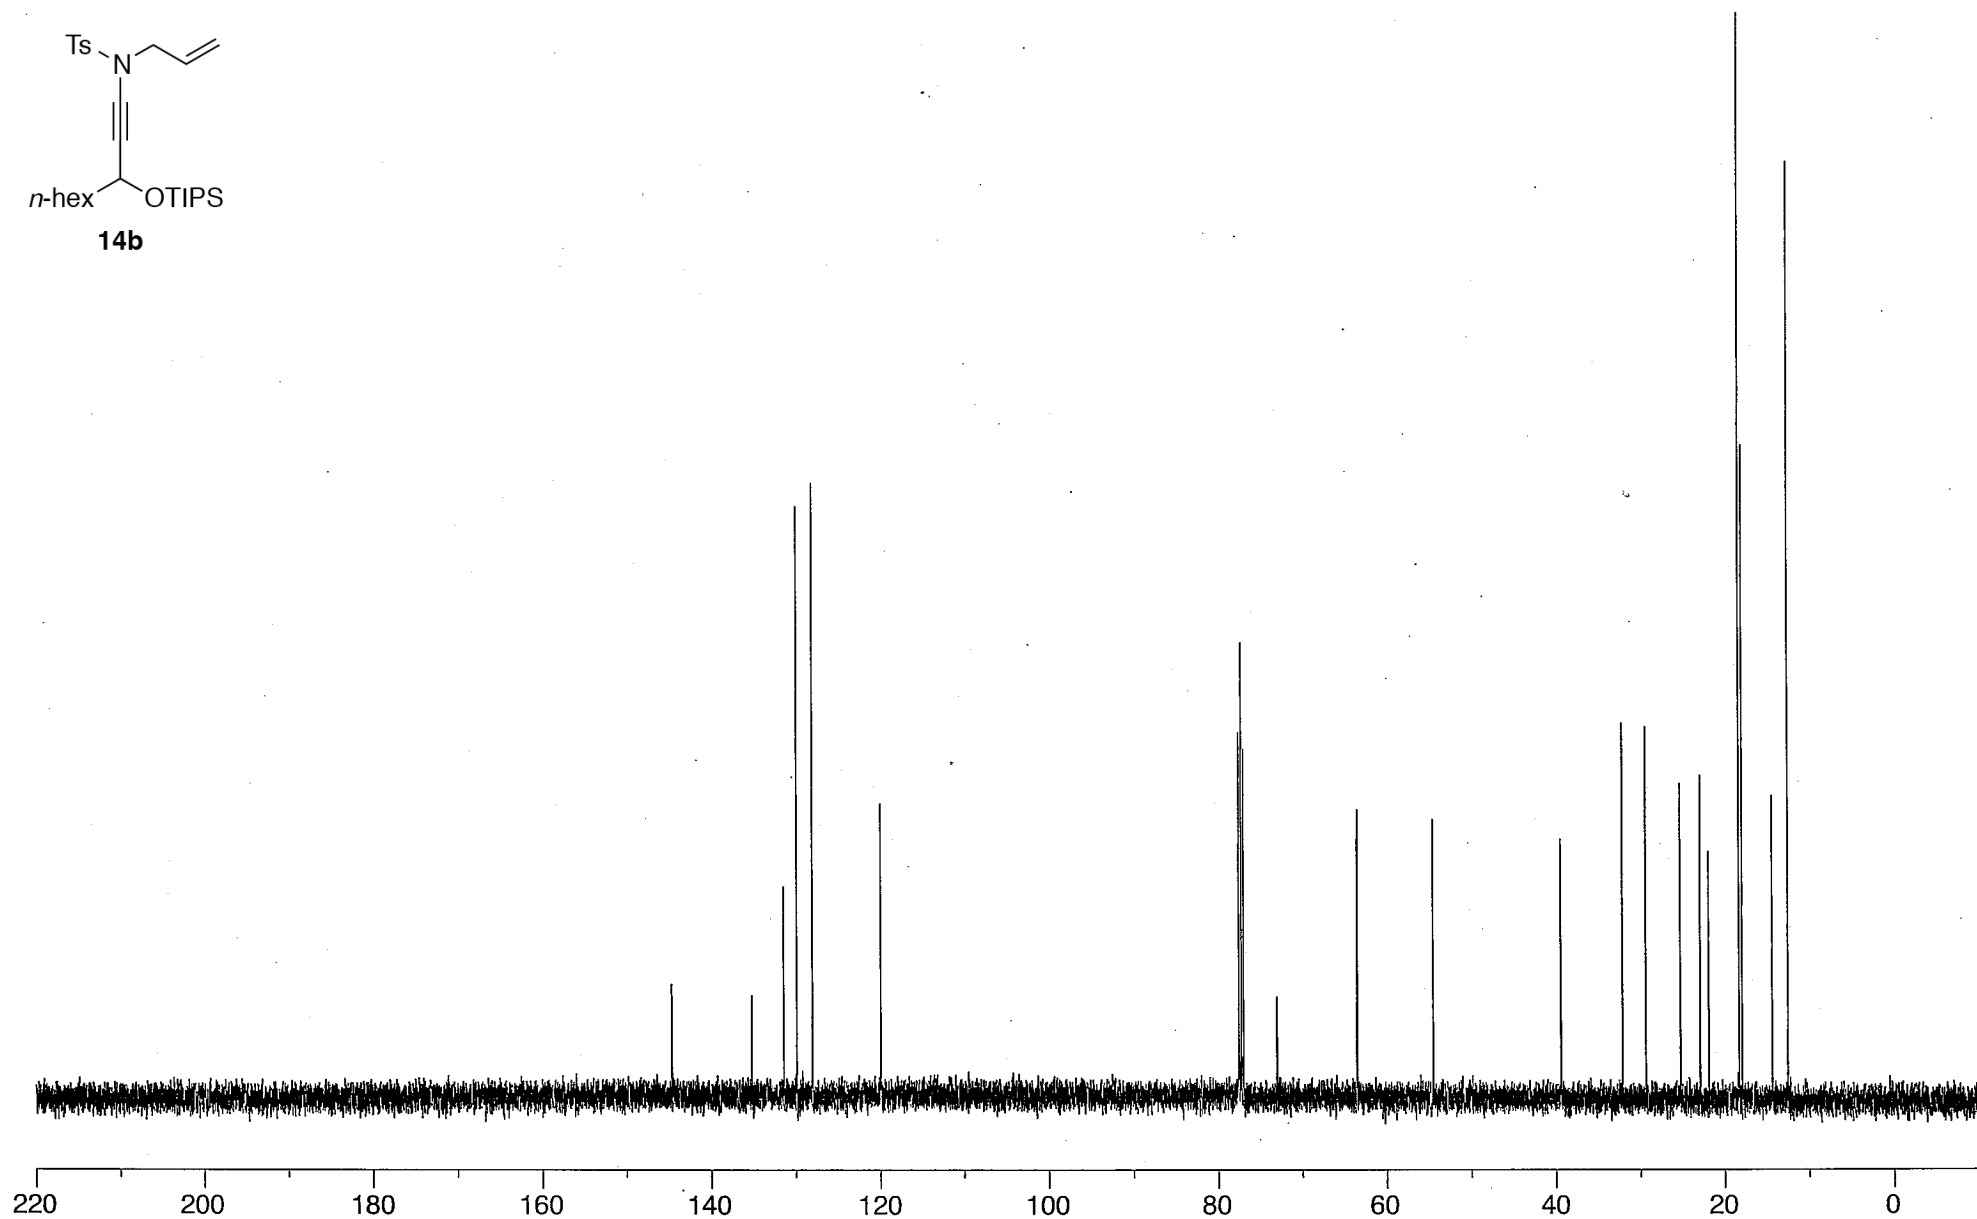

Pulse Sequence: s2pul  
Spectrometer Freq.: 499.73 MHz  
Solvent: CDCl<sub>3</sub>

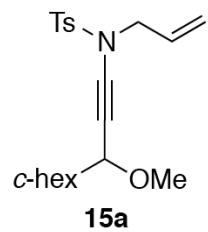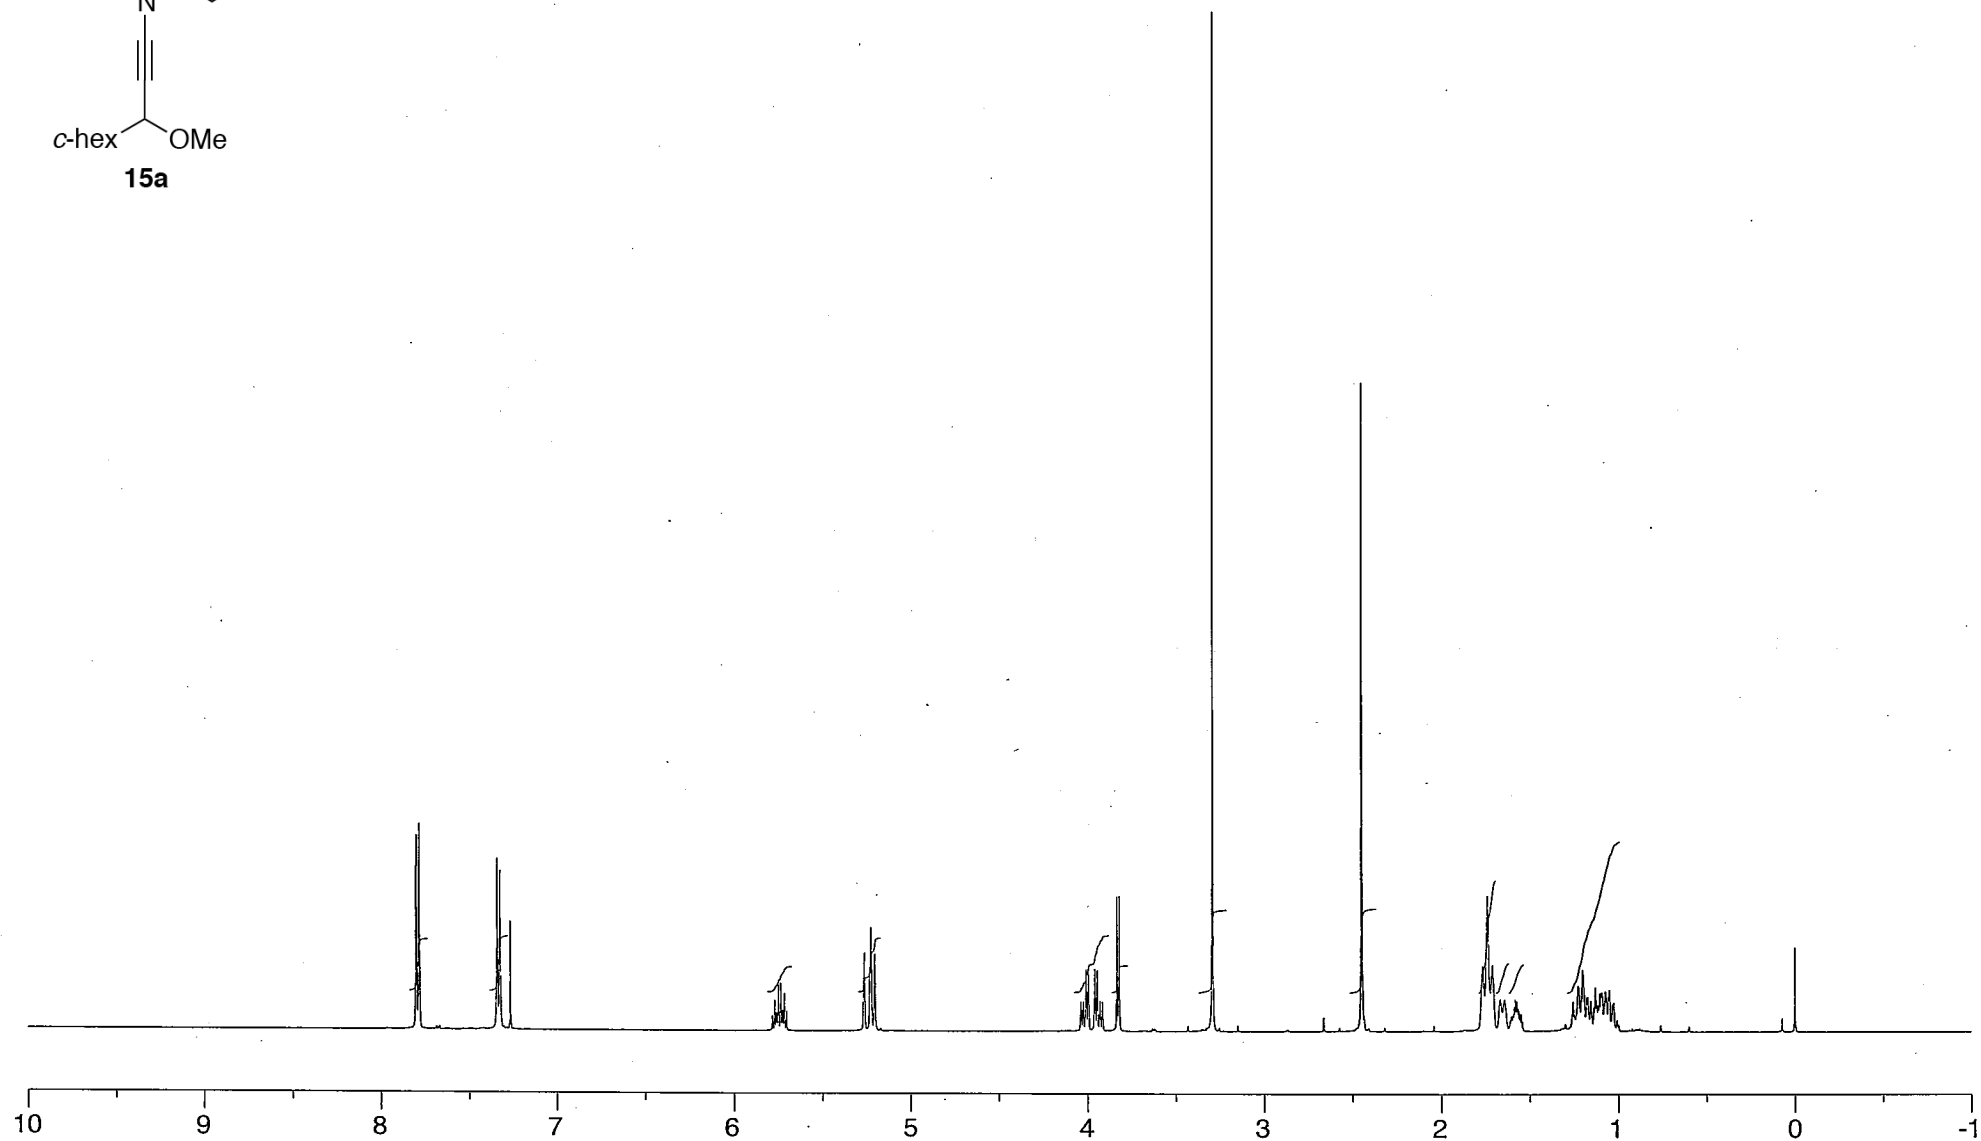



KAD-03-212AC\_22Oct2011

Pulse Sequence: s2pul  
Spectrometer Freq.: 125.67 MHz  
Solvent: CDCl<sub>3</sub>

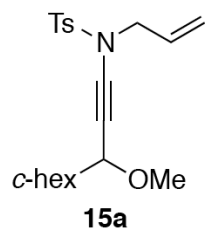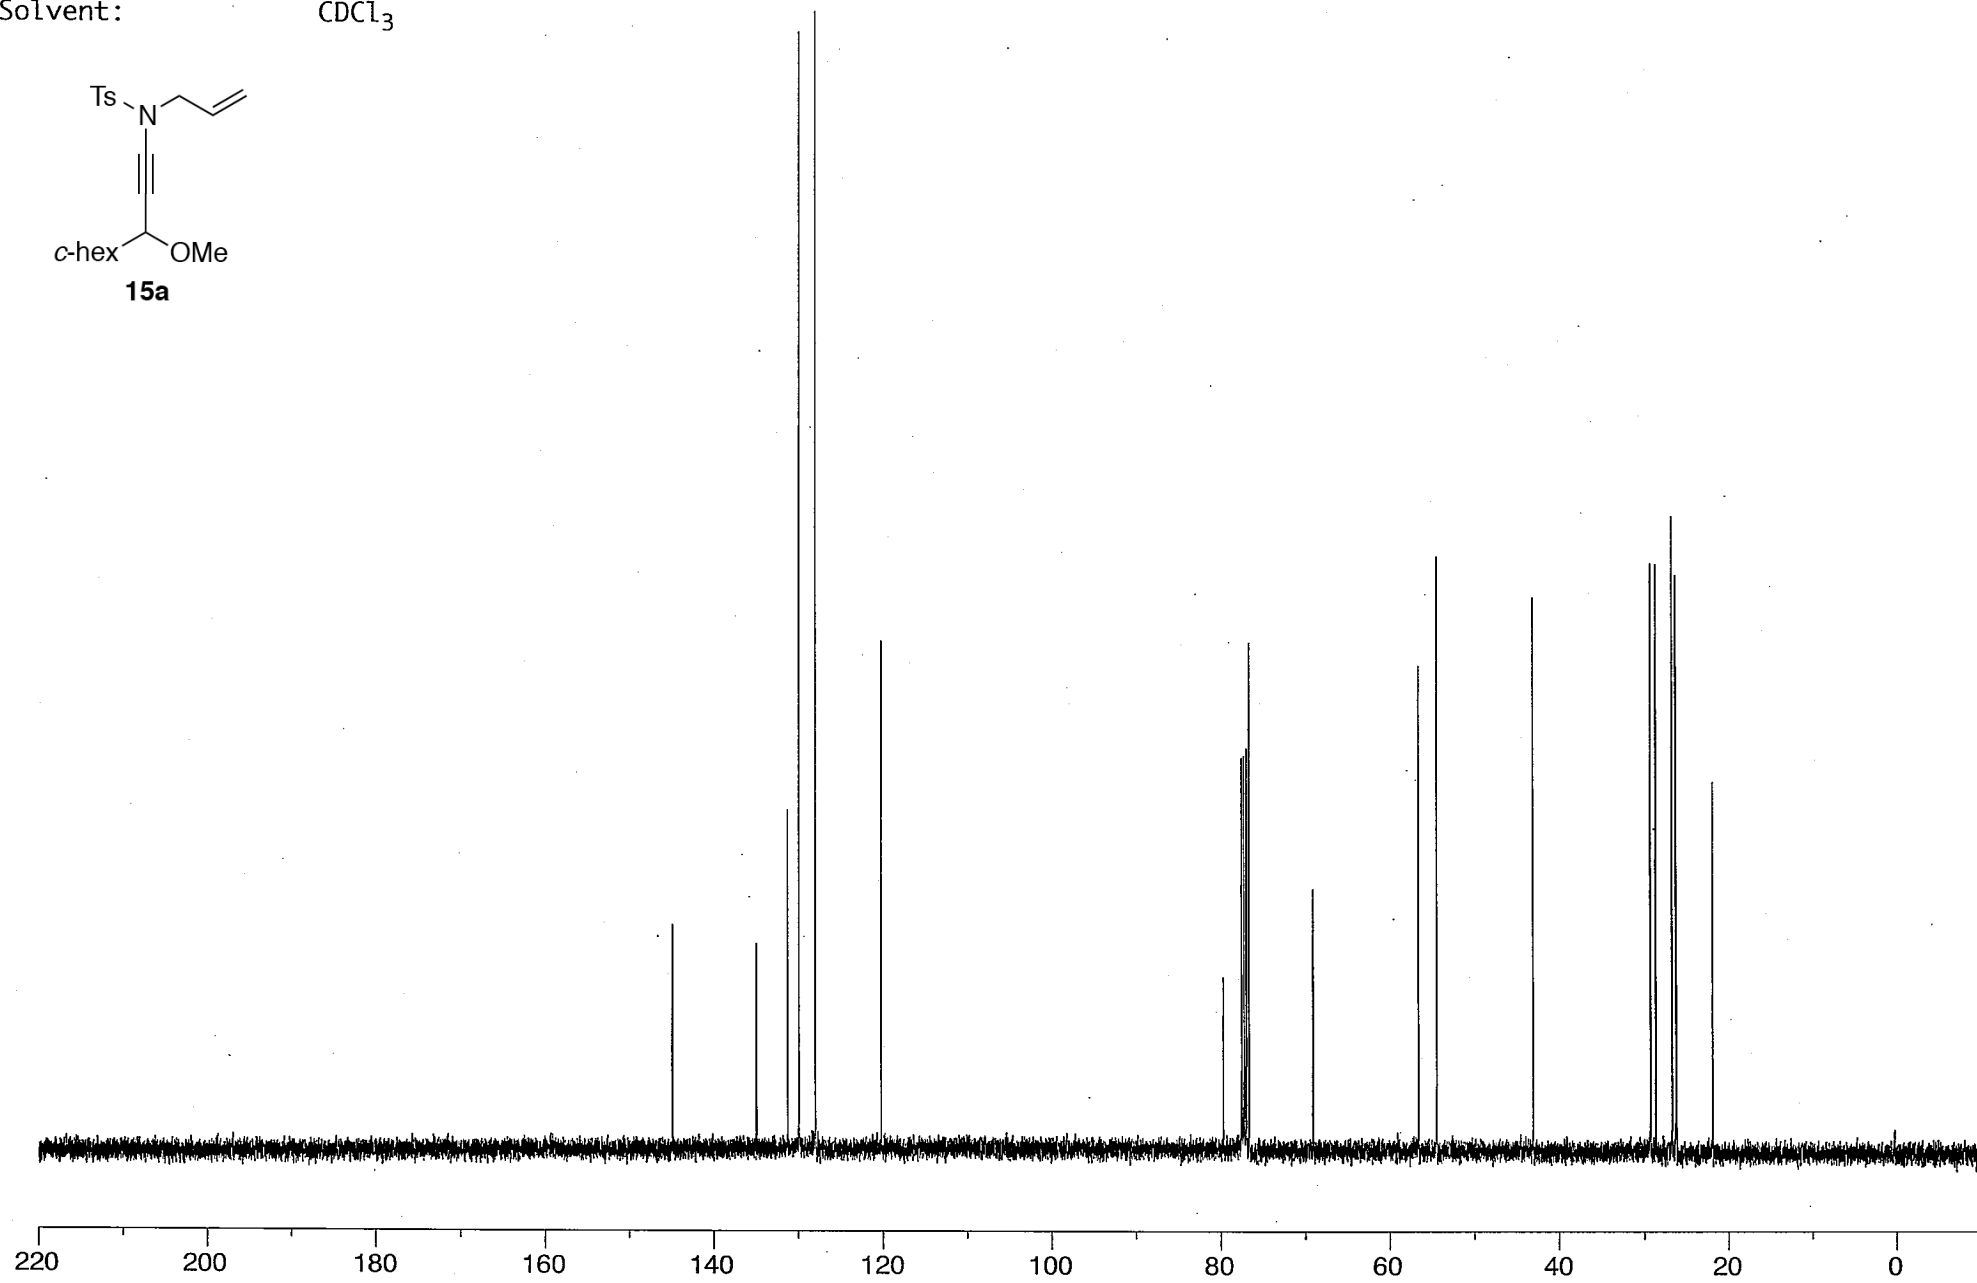

gwm-l-70\_01Aug2011

Pulse Sequence: s2pul  
Spectrometer Freq.: 399.79 MHz  
Solvent: CDCl<sub>3</sub>

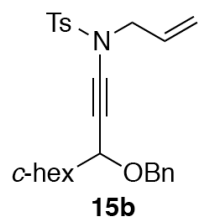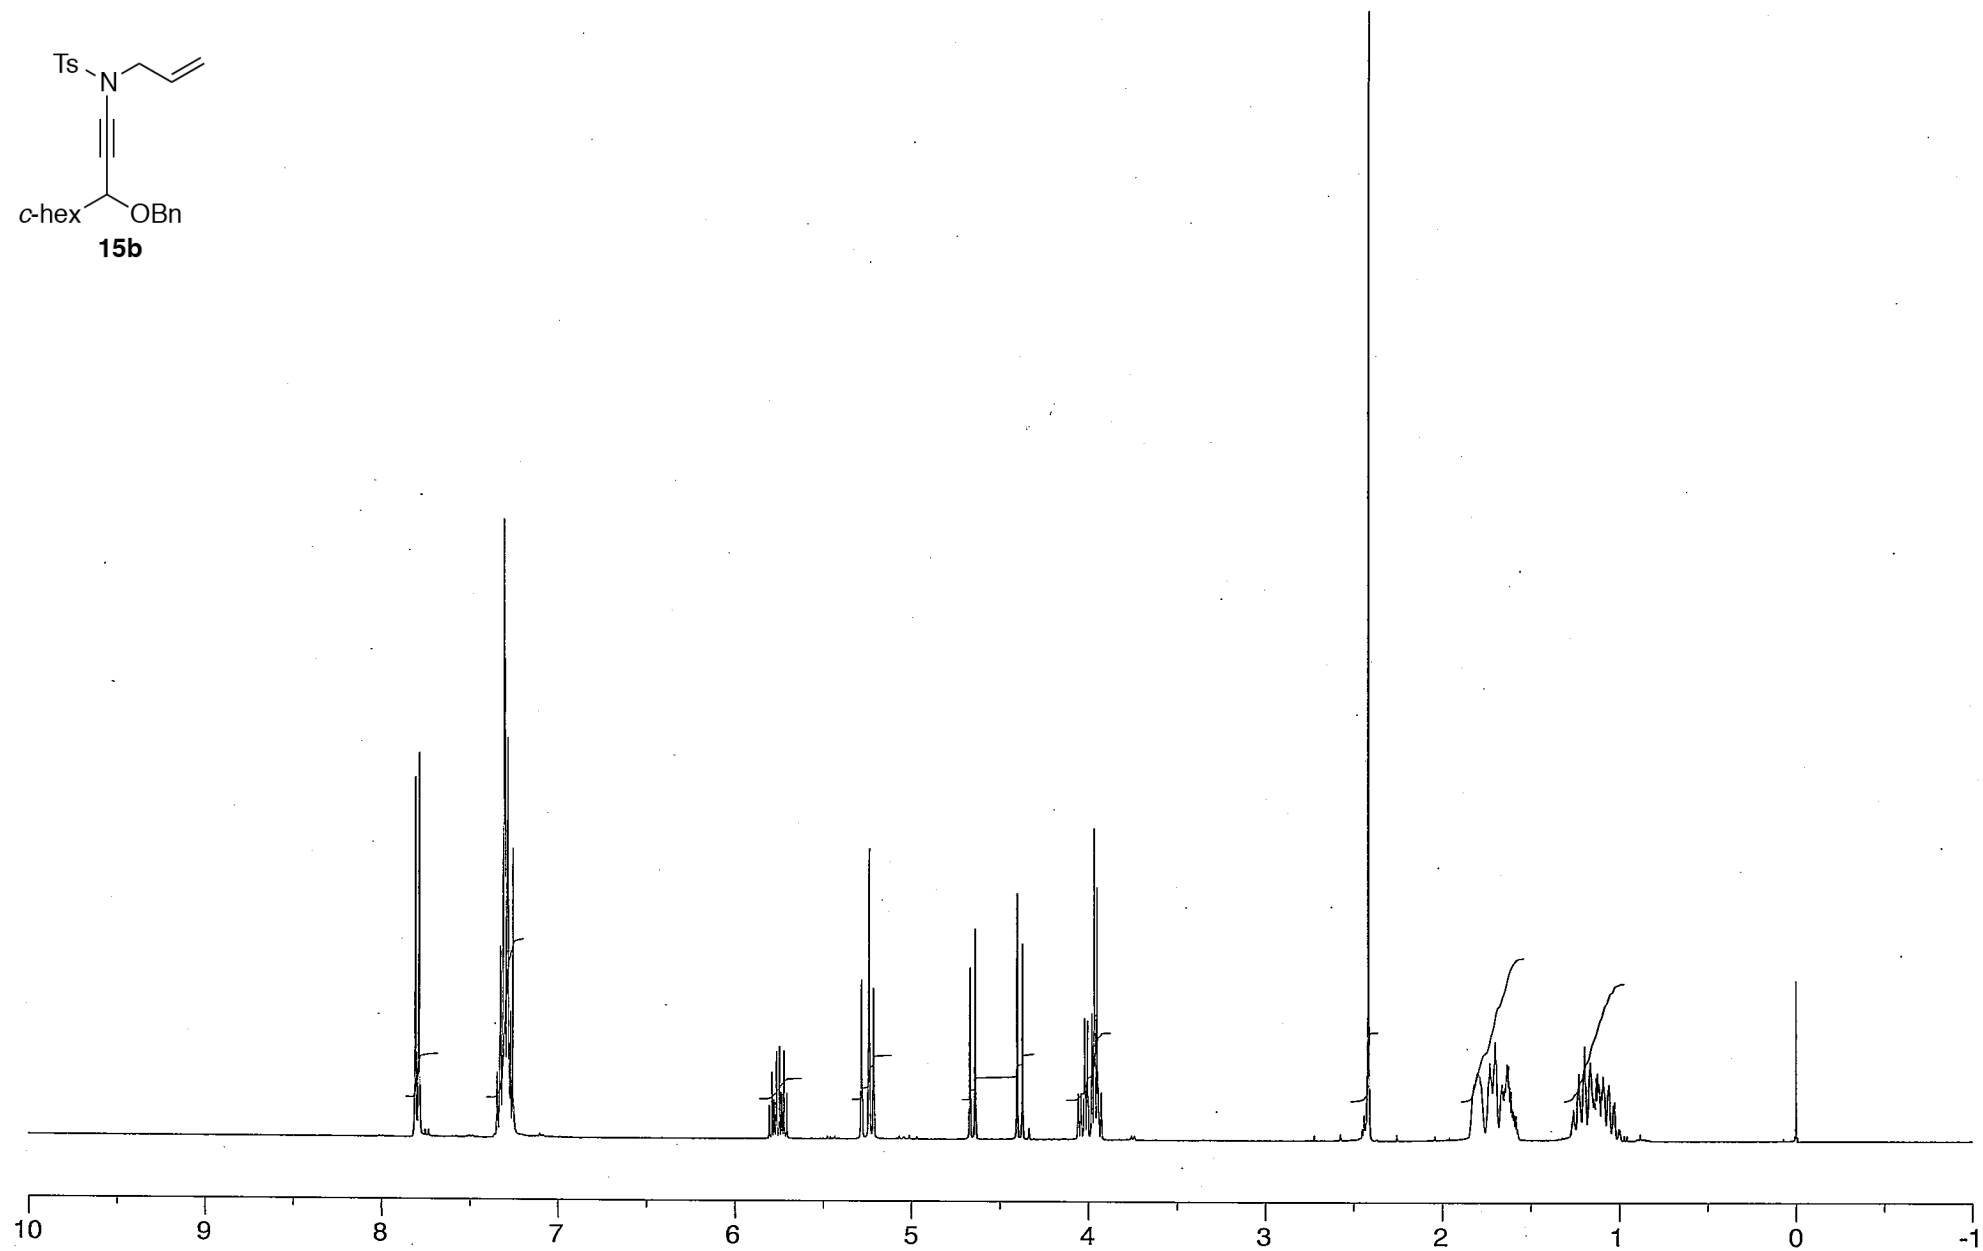

gwm-l-70\_01Aug2011

Pulse Sequence: s2pu1  
Spectrometer Freq.: 100.54 MHz  
Solvent: CDCl<sub>3</sub>

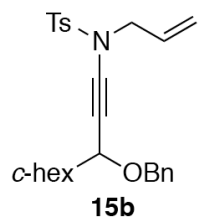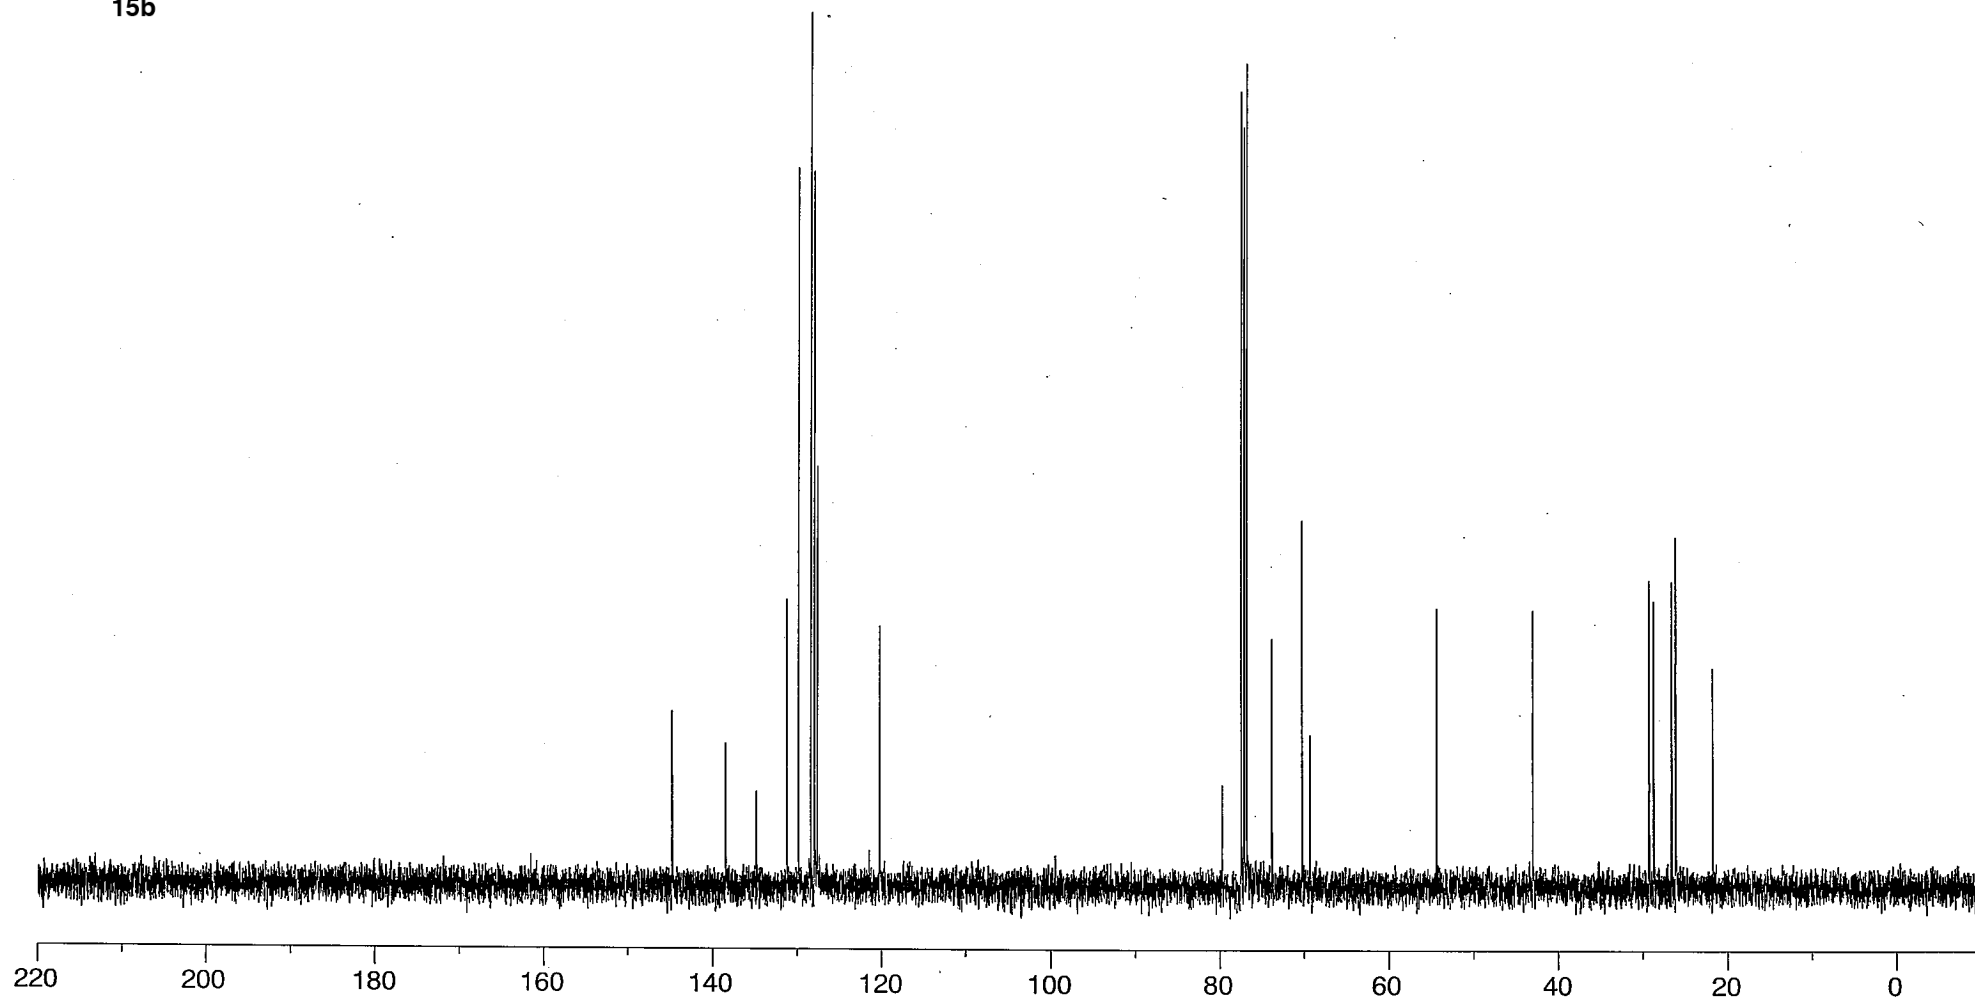

gwm-l-67\_27Jul2011

Pulse Sequence: s2pul  
Spectrometer Freq.: 399.79 MHz  
Solvent: CDCl<sub>3</sub>

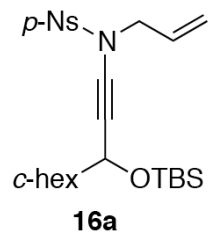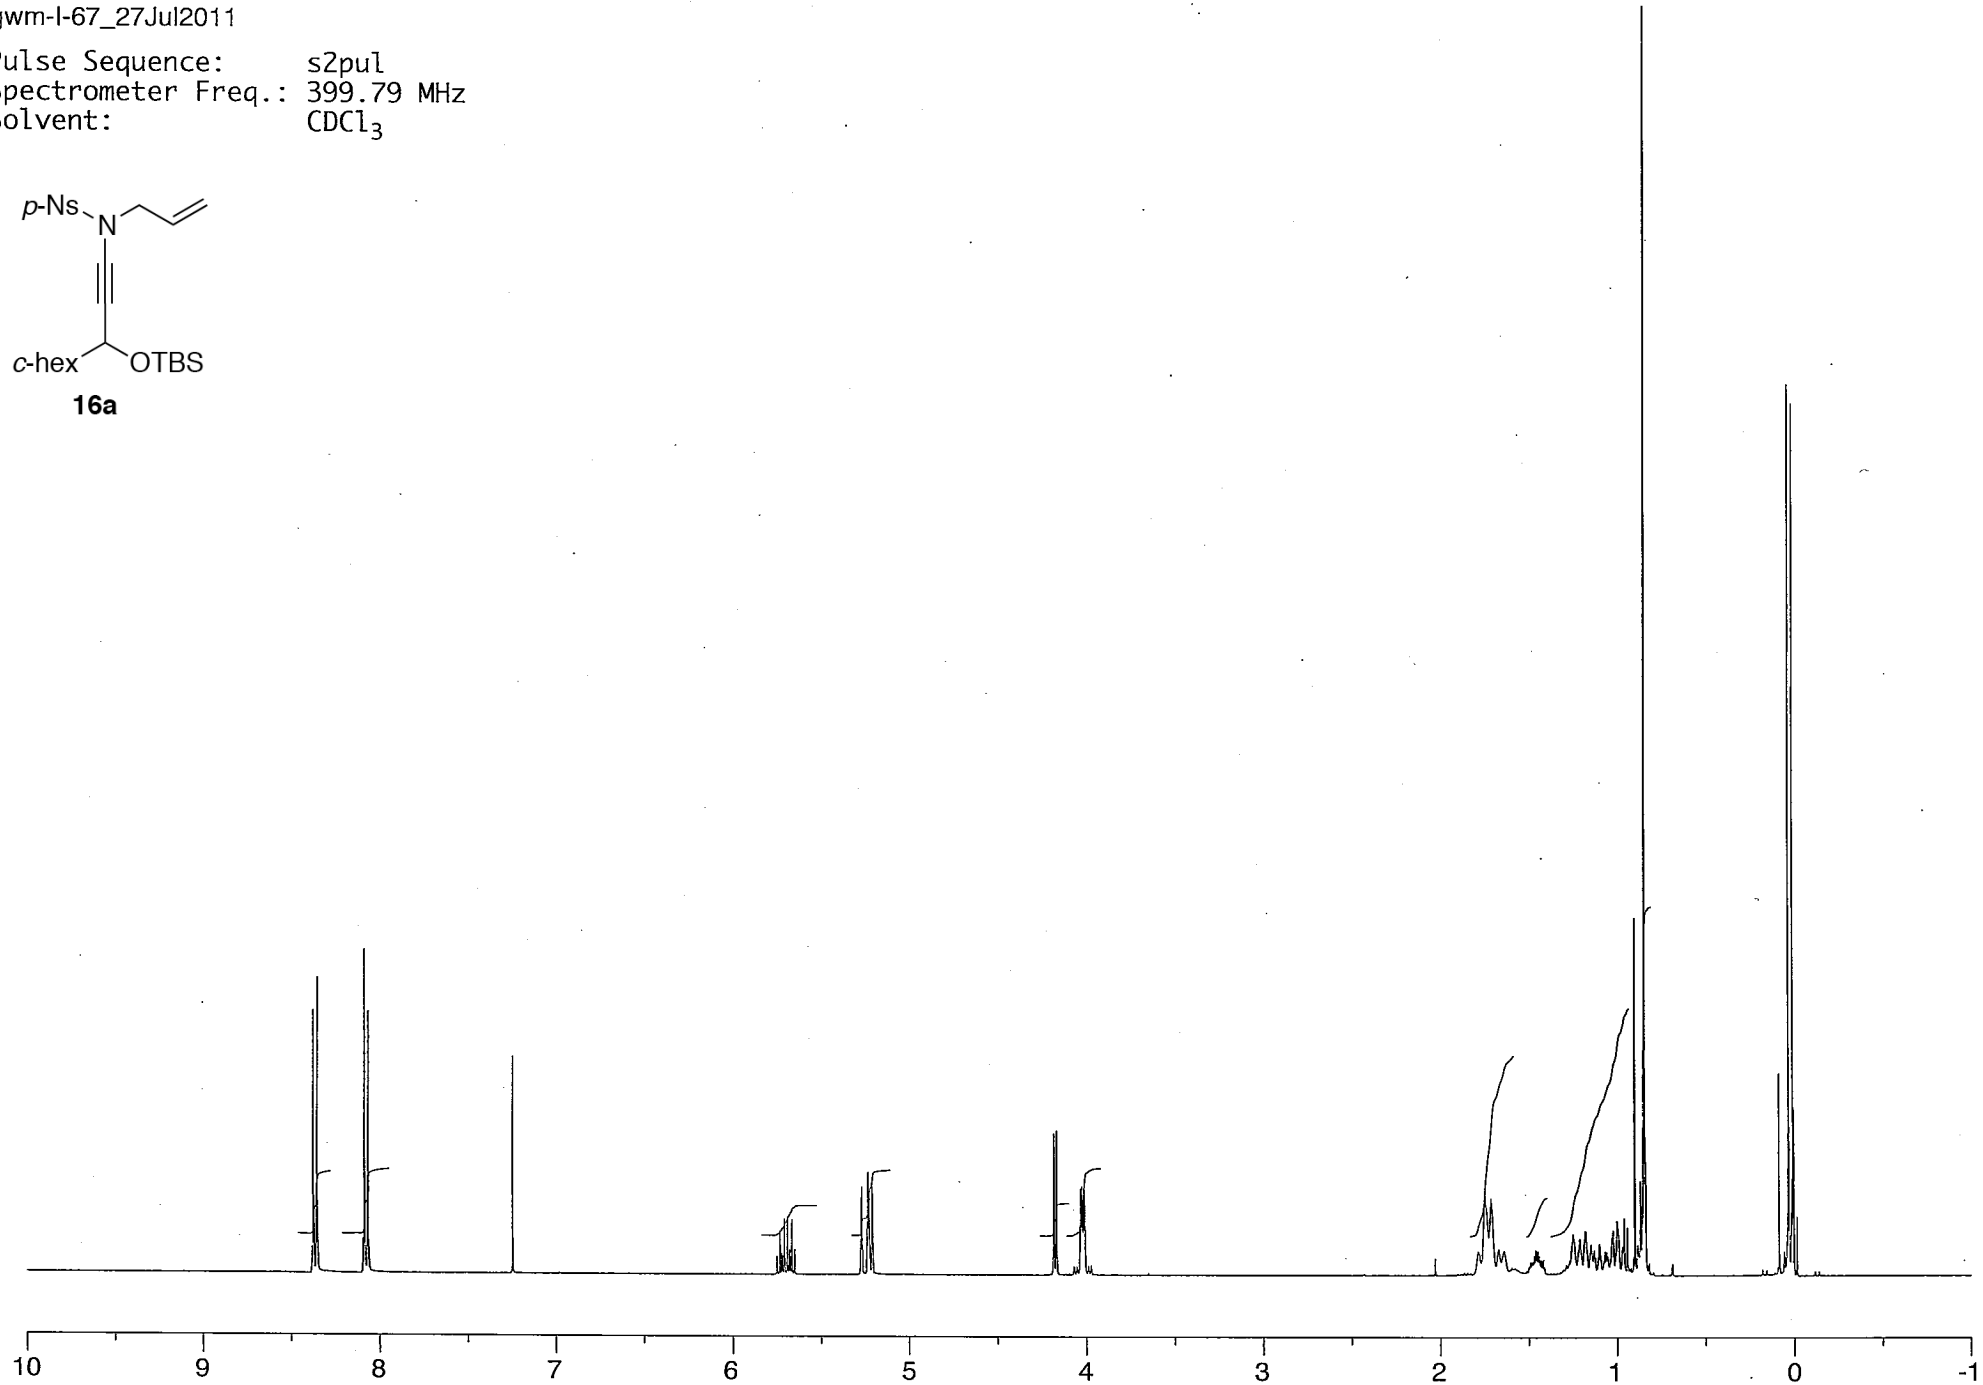

Pulse Sequence: s2pul  
Spectrometer Freq.: 125.67 MHz  
Solvent: CDCl<sub>3</sub>

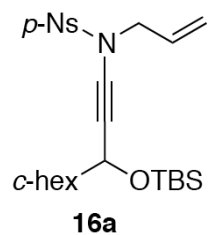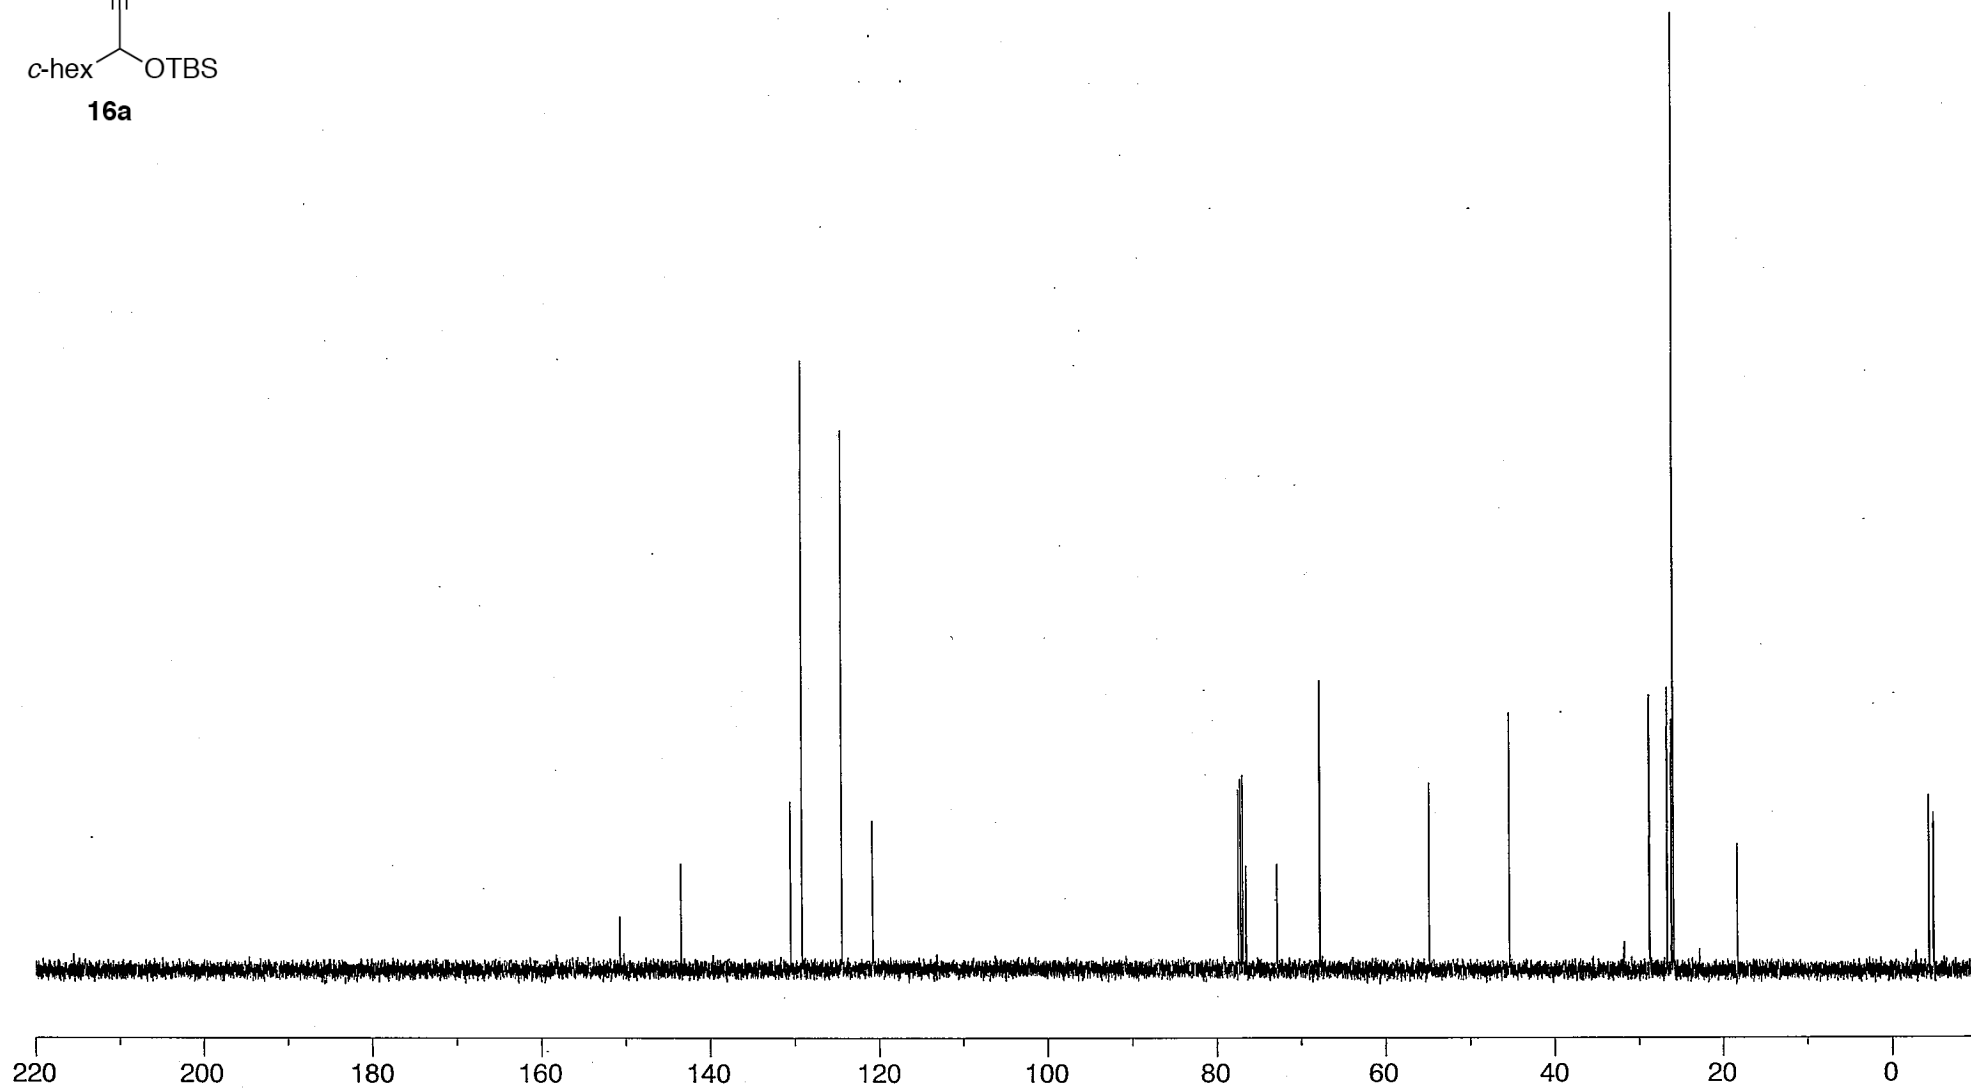

Pulse Sequence: s2pul  
Spectrometer Freq.: 499.73 MHz  
Solvent: CDCl<sub>3</sub>

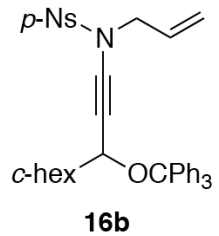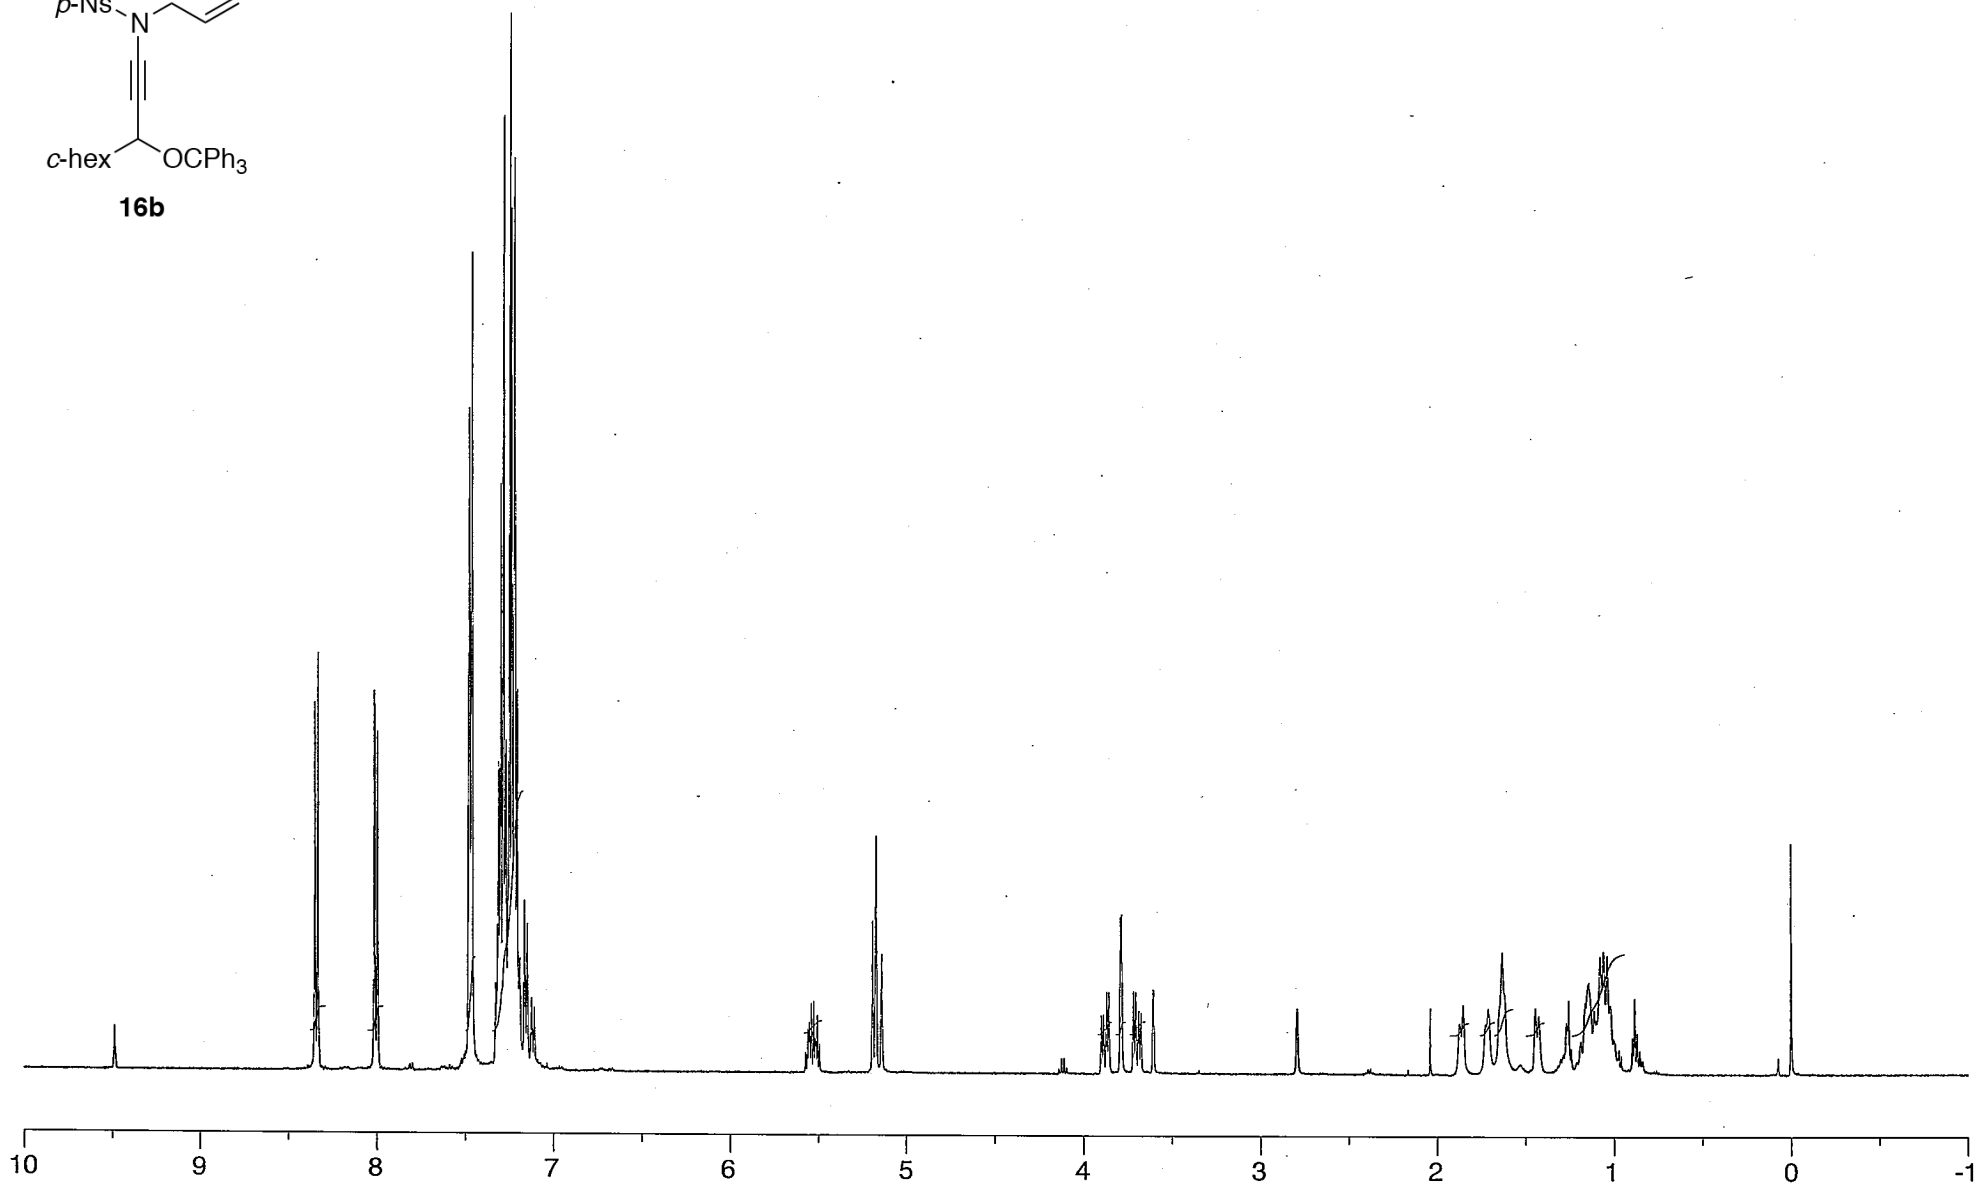

KAD-03-194\_08Oct2011

Pulse Sequence: s2pul  
Spectrometer Freq.: 125.67 MHz  
Solvent: CDCl<sub>3</sub>

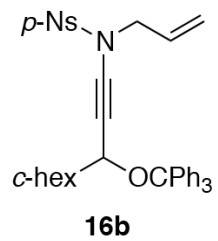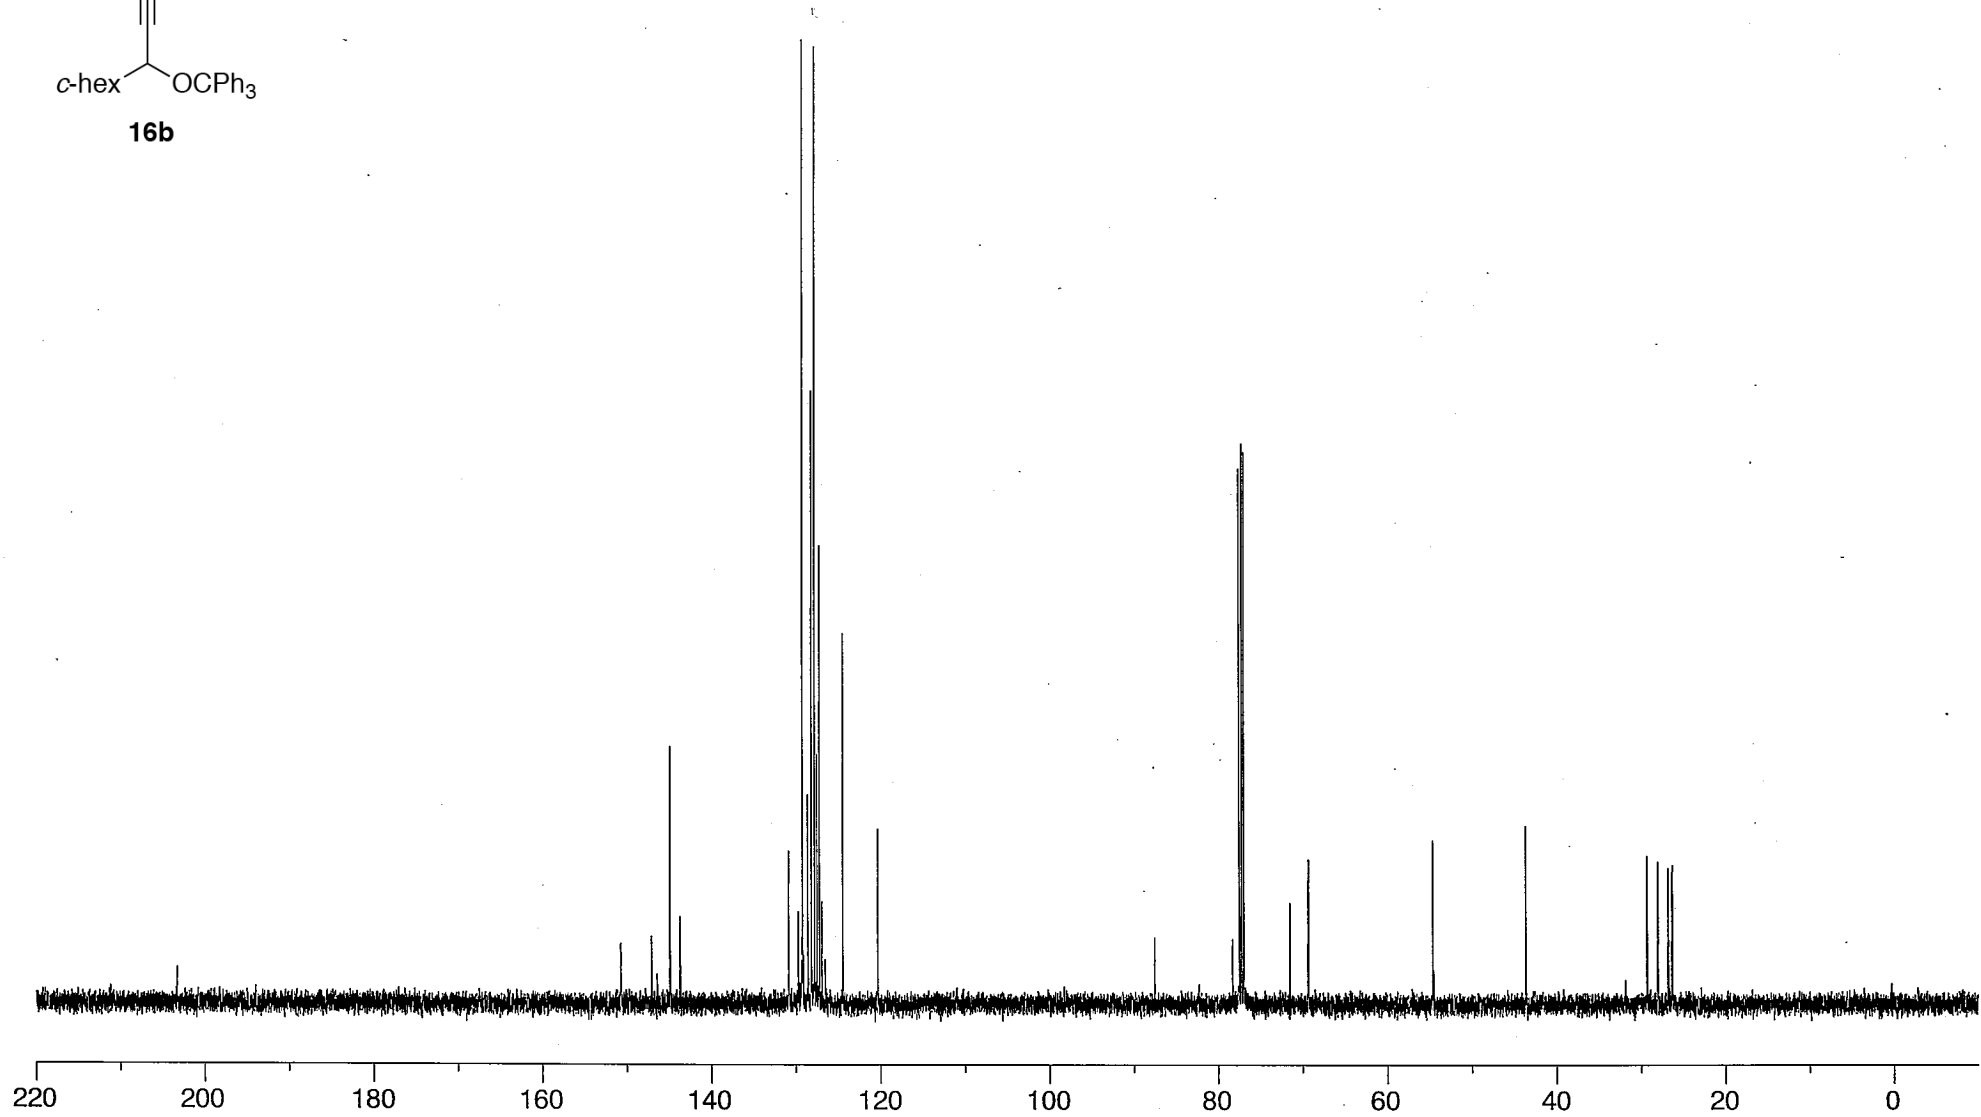

KAD-03-135\_27Jul2011

Pulse Sequence: s2pul  
Spectrometer Freq.: 499.73 MHz  
Solvent: CDCl<sub>3</sub>

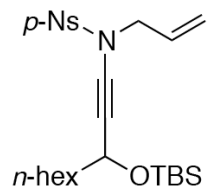

17

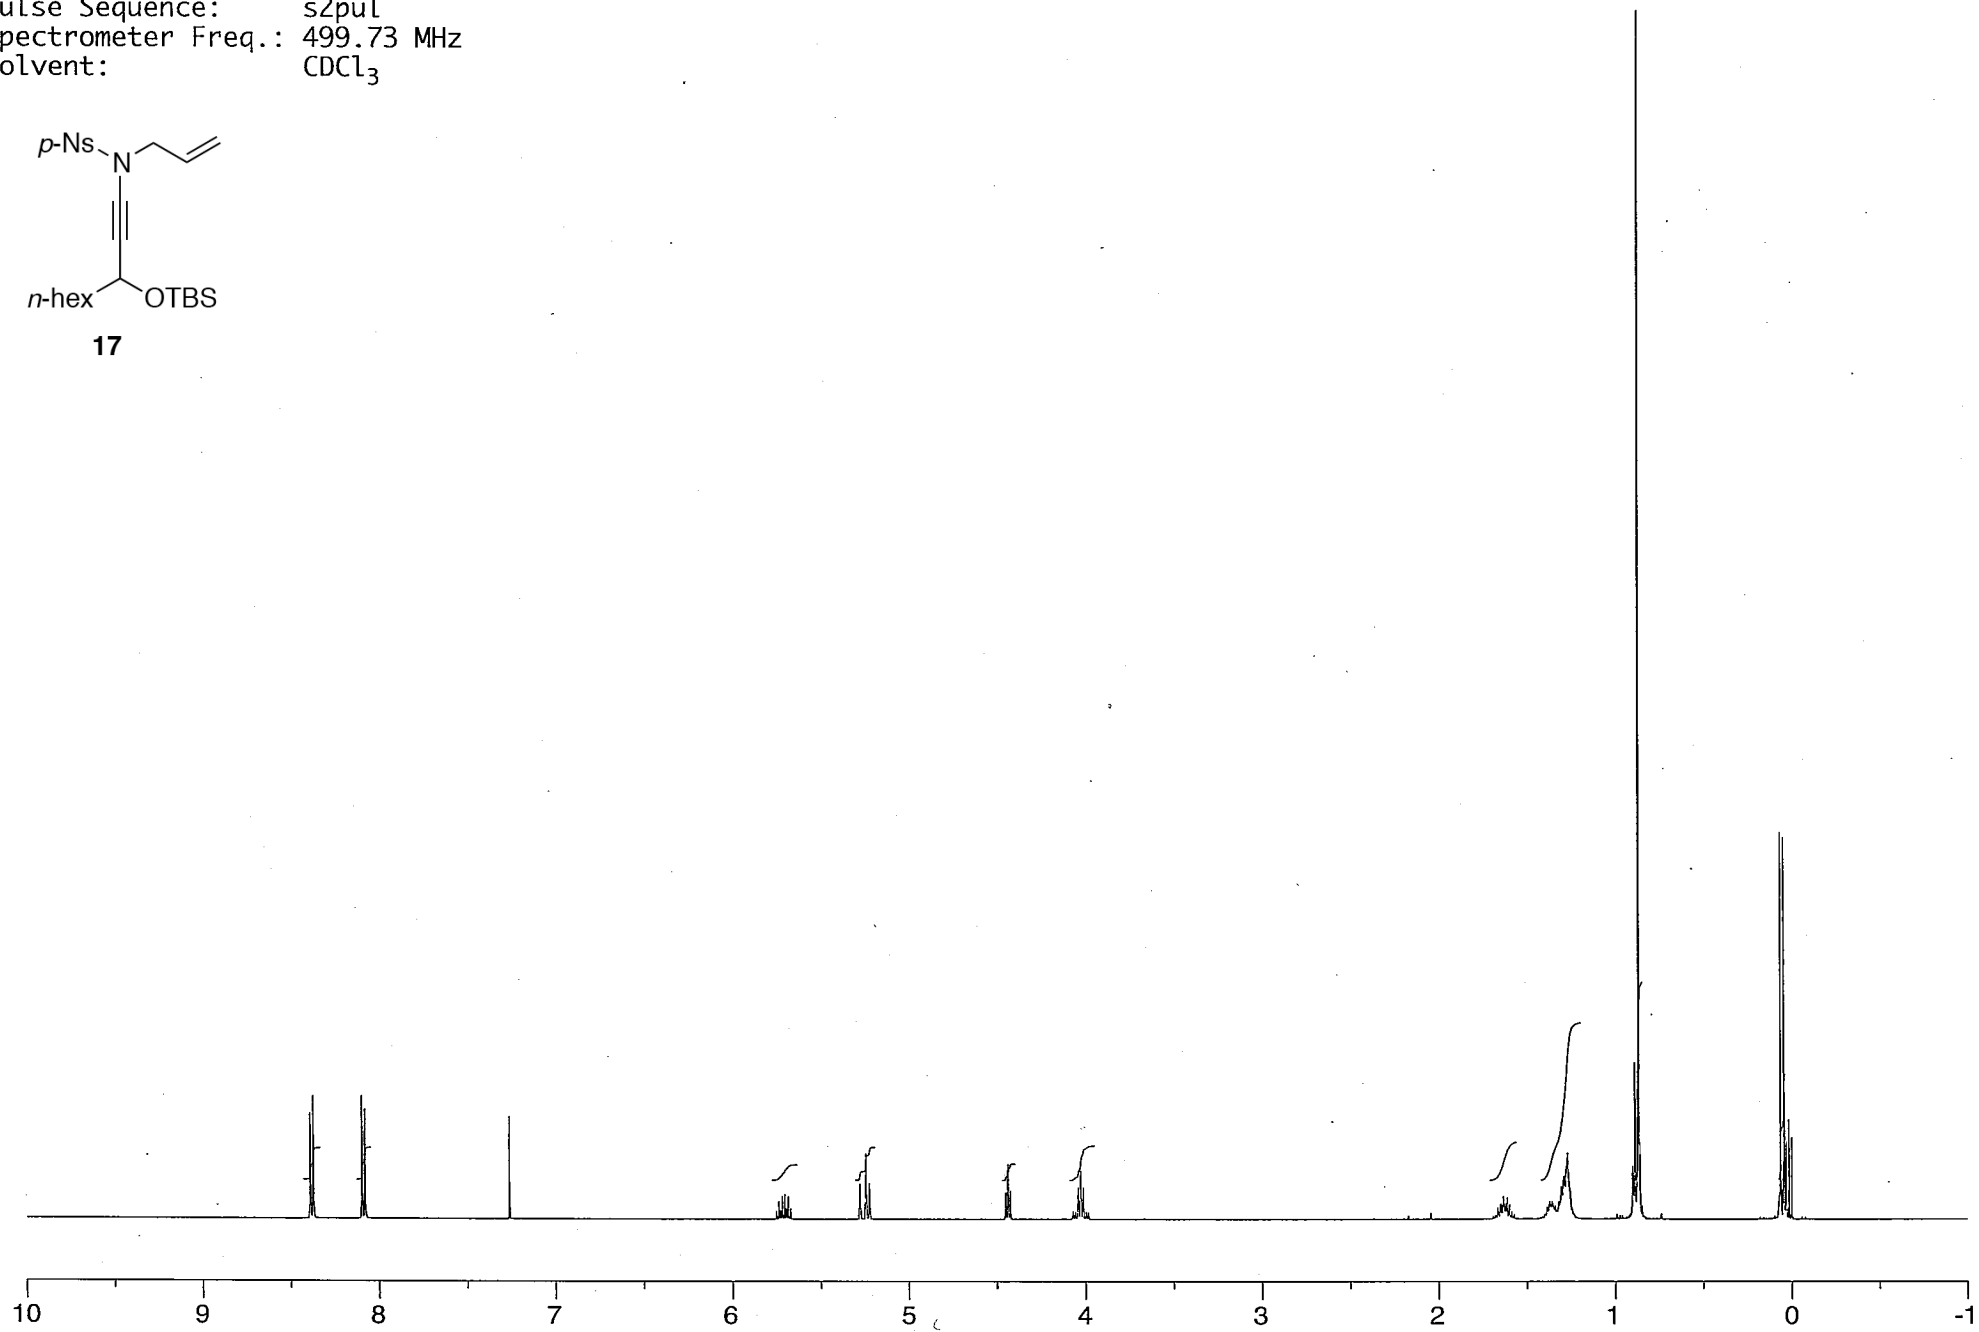



Pulse Sequence: s2pul  
Spectrometer Freq.: 125.67 MHz  
Solvent: CDCl<sub>3</sub>

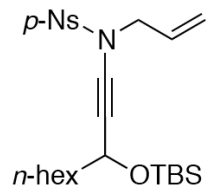

17

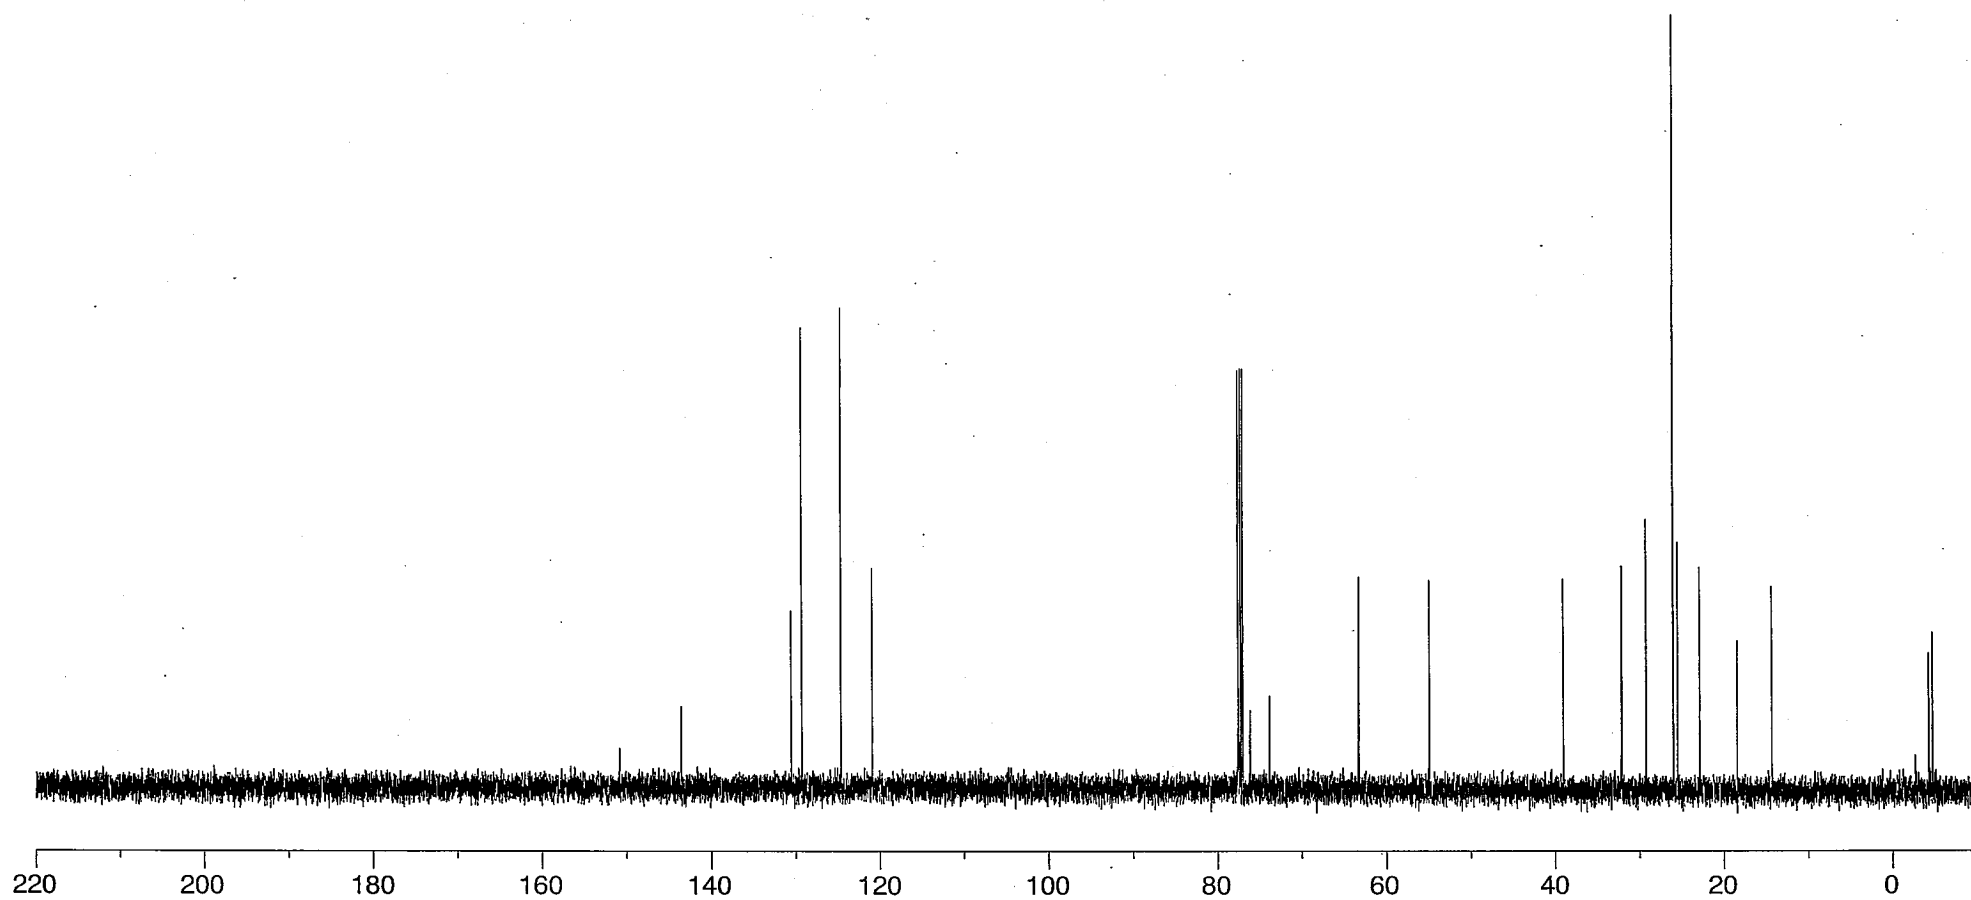

wxn22-1\_10Oct2011-16:10:19

Archive directory: /export/home/xiaona/vnmrsys/data  
Sample directory: wxn22-1\_10Oct2011-16:10:19

Pulse Sequence: s2pul

Solvent: CDCl3  
Temp. 25.0 C / 298.1 K  
File: PROTON  
INOVA-500 "nmr03"

Relax. delay 1.000 sec  
Pulse 45.0 degrees  
Acq. time 3.754 sec  
Width 6387.7 Hz  
8 repetitions  
OBSERVE H1, 399.7865214 MHz  
DATA PROCESSING  
FT size 65536  
Total time 0 min, 57 sec

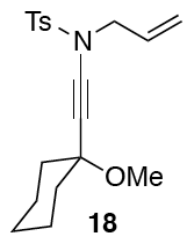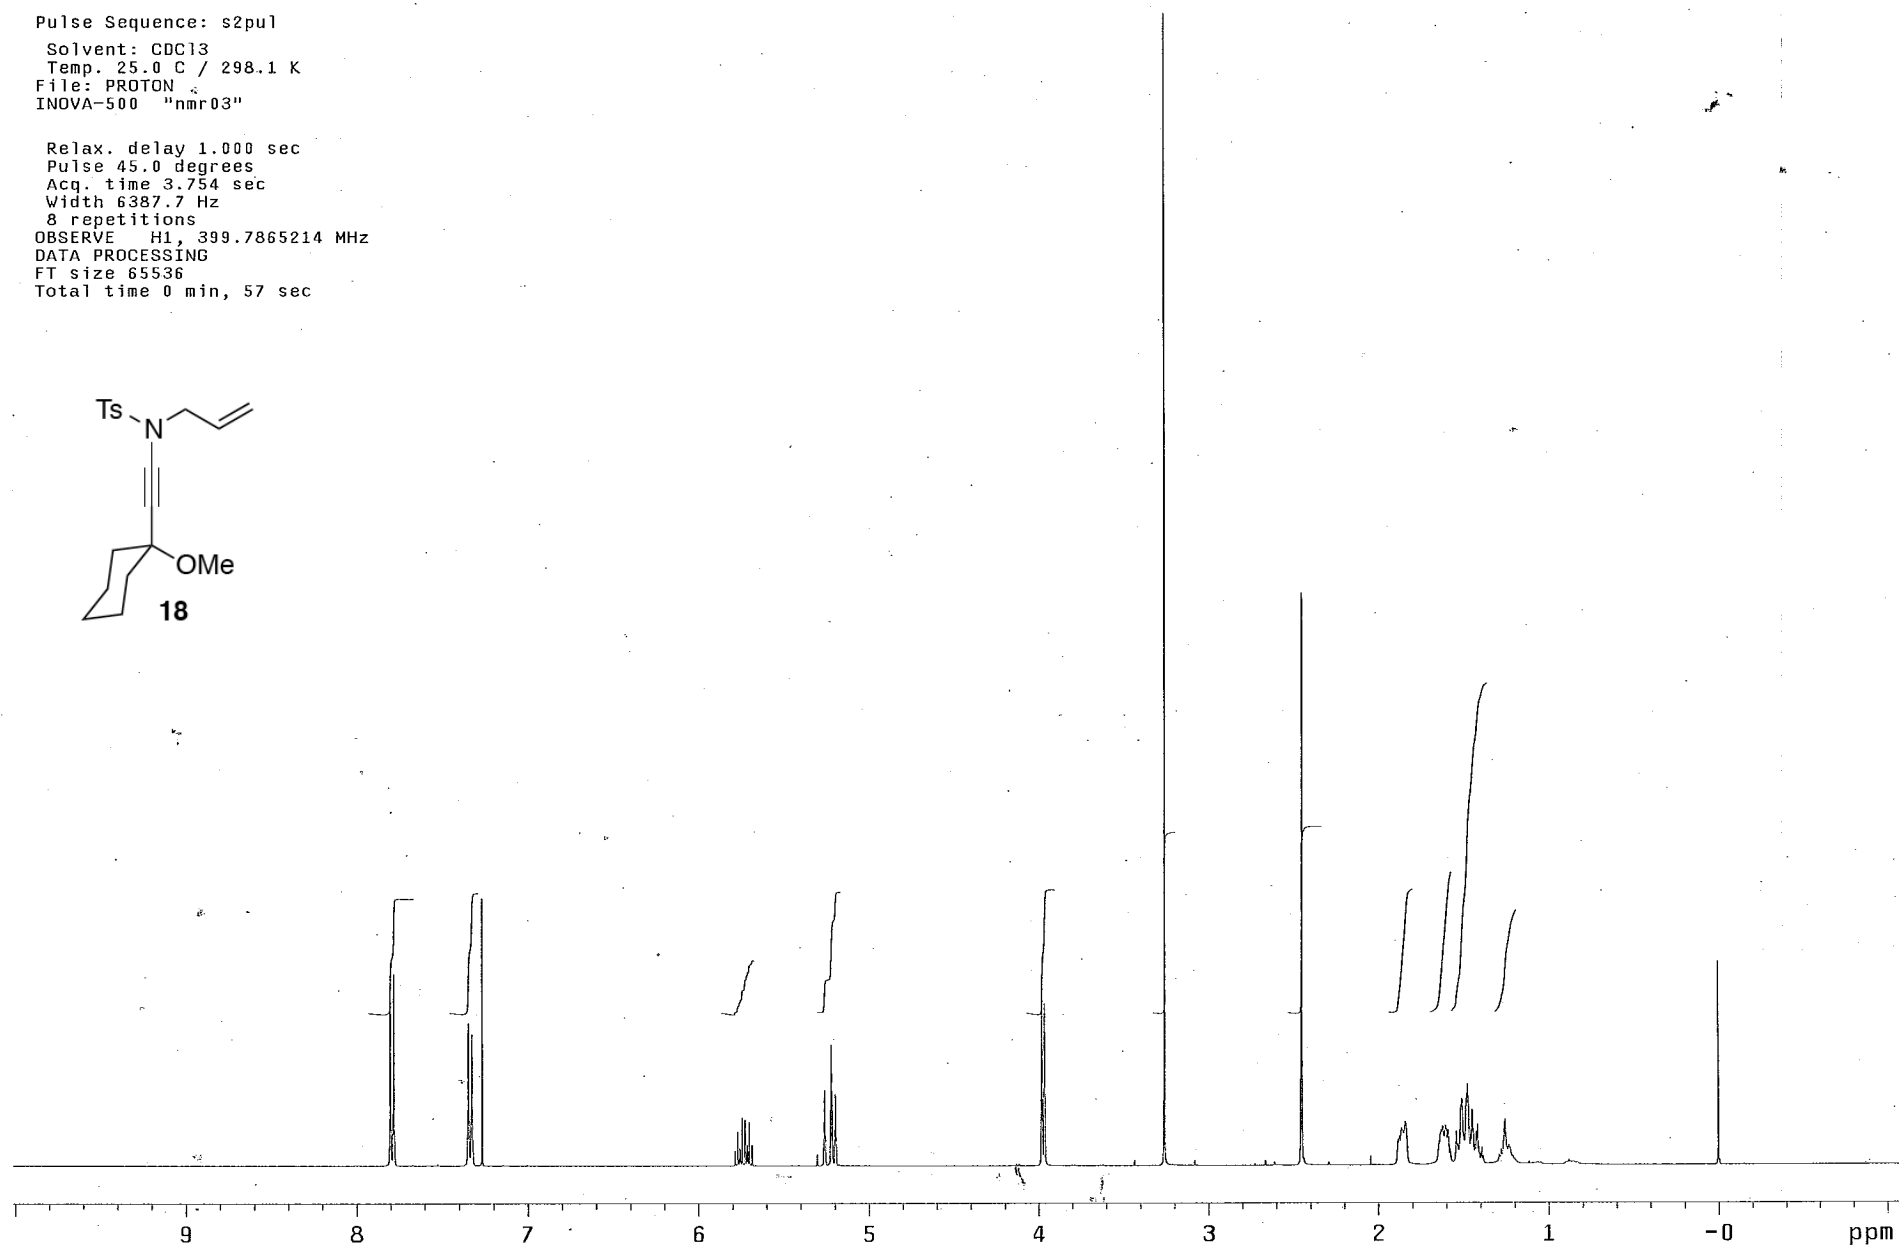

wxn22-1\_10Oct2011-17:25:08

Archive directory: /export/home/xiaona/vnmrsys/data  
Sample directory: wxn22-1\_10Oct2011-17:25:08

Pulse Sequence: s2pul

Solvent: CDCl3  
Temp. 25.0 C / 298.1 K  
File: CARBON  
INNOVA-500 "nmr03"

Relax. delay 1.000 sec  
Pulse 45.0 degrees  
Acq. time 1.197 sec  
Width 25157.2 Hz  
174 repetitions  
OBSERVE C13, 100.5264076 MHz  
DECOUPLE H1, 399.7885243 MHz  
Power 41 dB  
continuously on  
WALTZ-16 modulated  
DATA PROCESSING  
Line broadening 0.8 Hz  
FT size 65536  
Total time 36 min, 45 sec

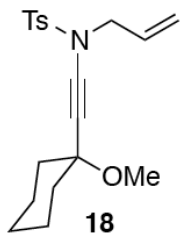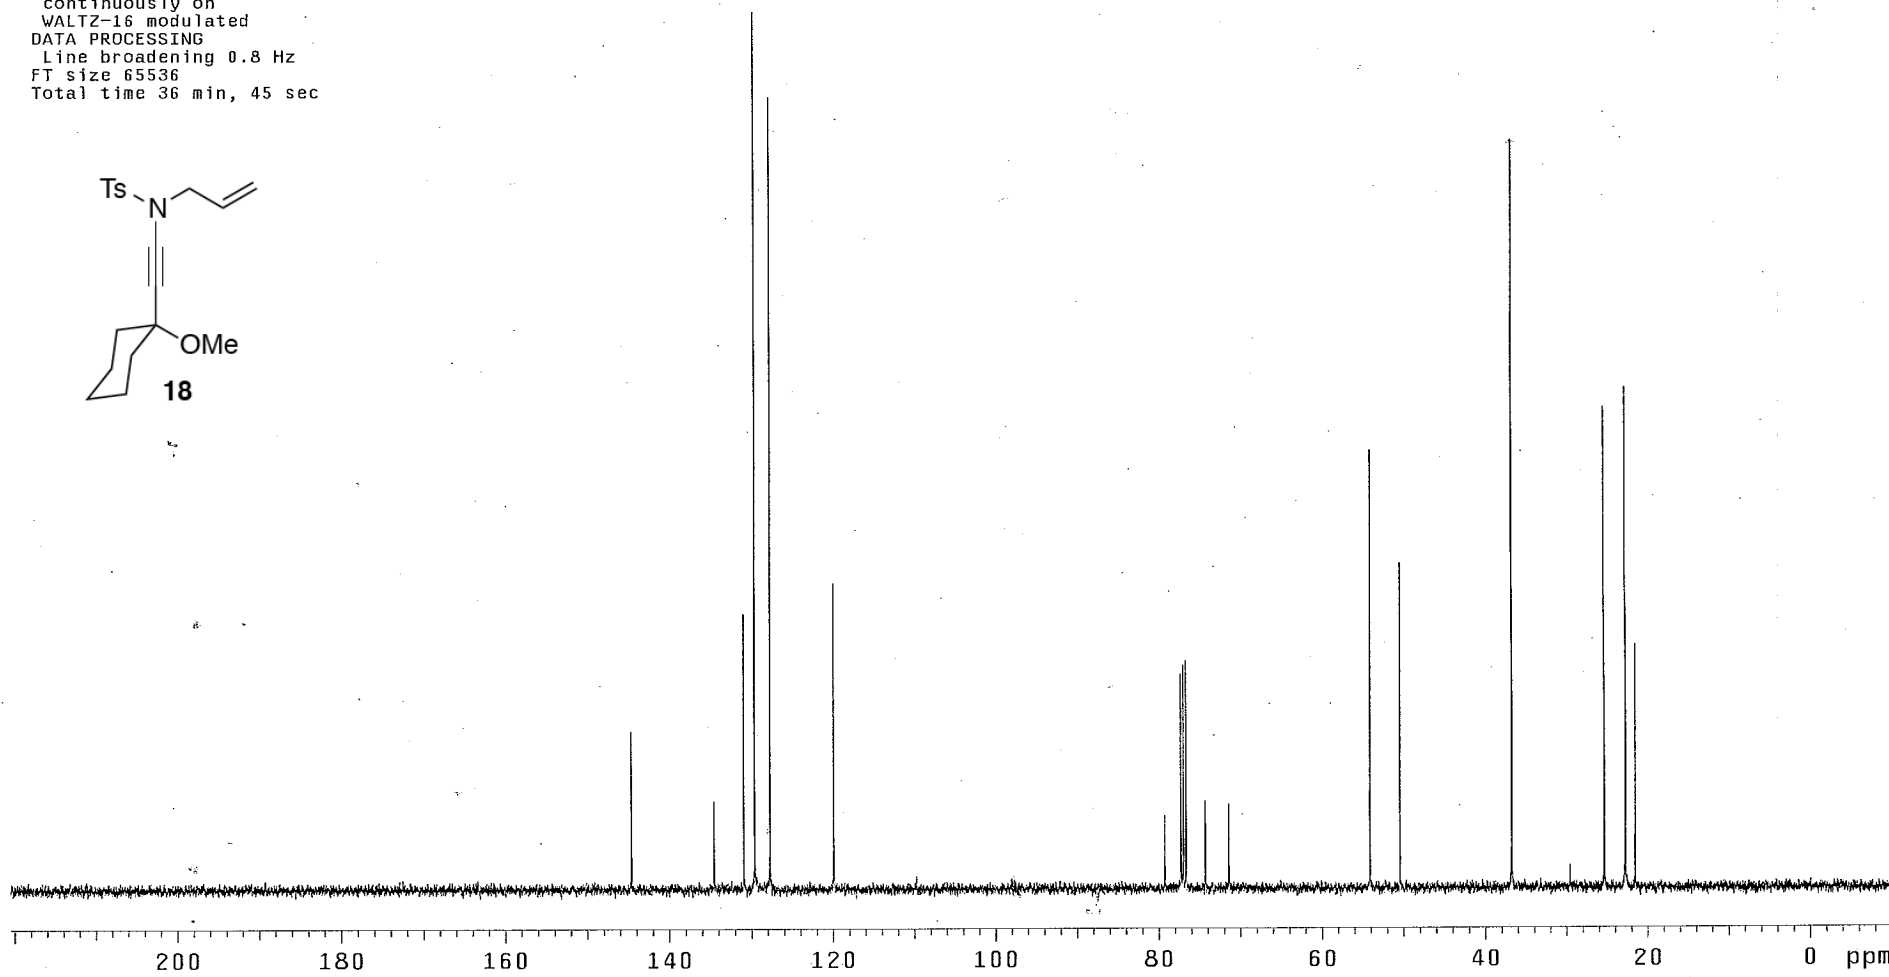

KAD-03-047B

Pulse Sequence: s2pul  
Spectrometer Freq.: 499.73 MHz  
Solvent: CDCl<sub>3</sub>

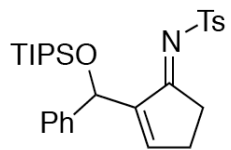

8

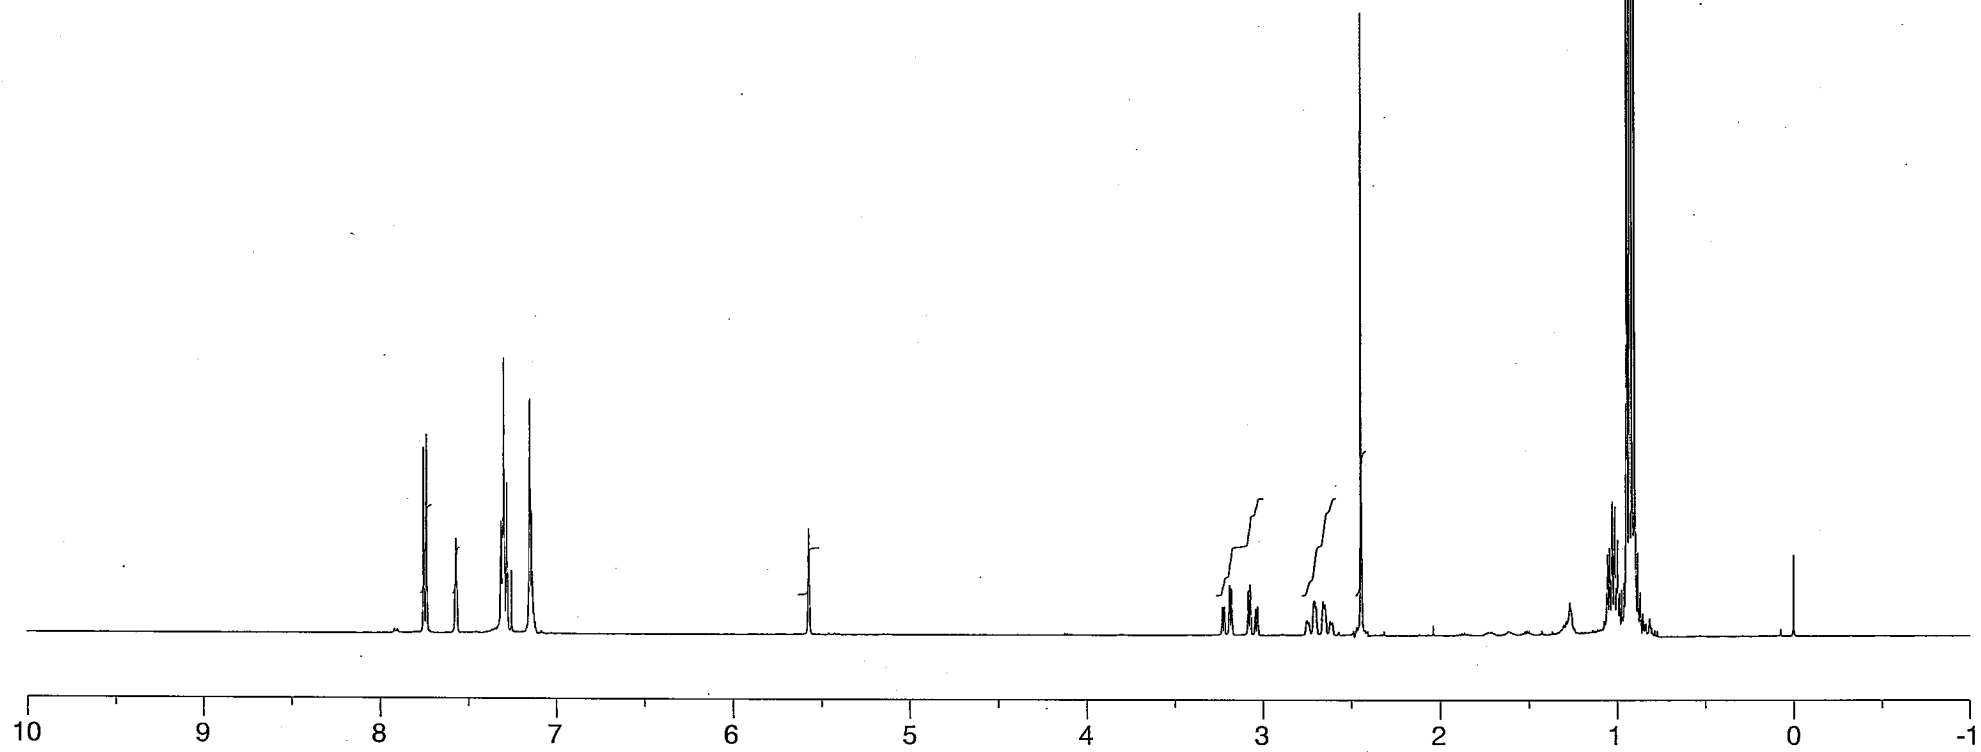

KAD-03-047B

Pulse Sequence: s2pul  
Spectrometer Freq.: 125.67 MHz  
Solvent: CDCl<sub>3</sub>

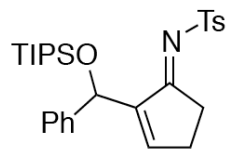

8

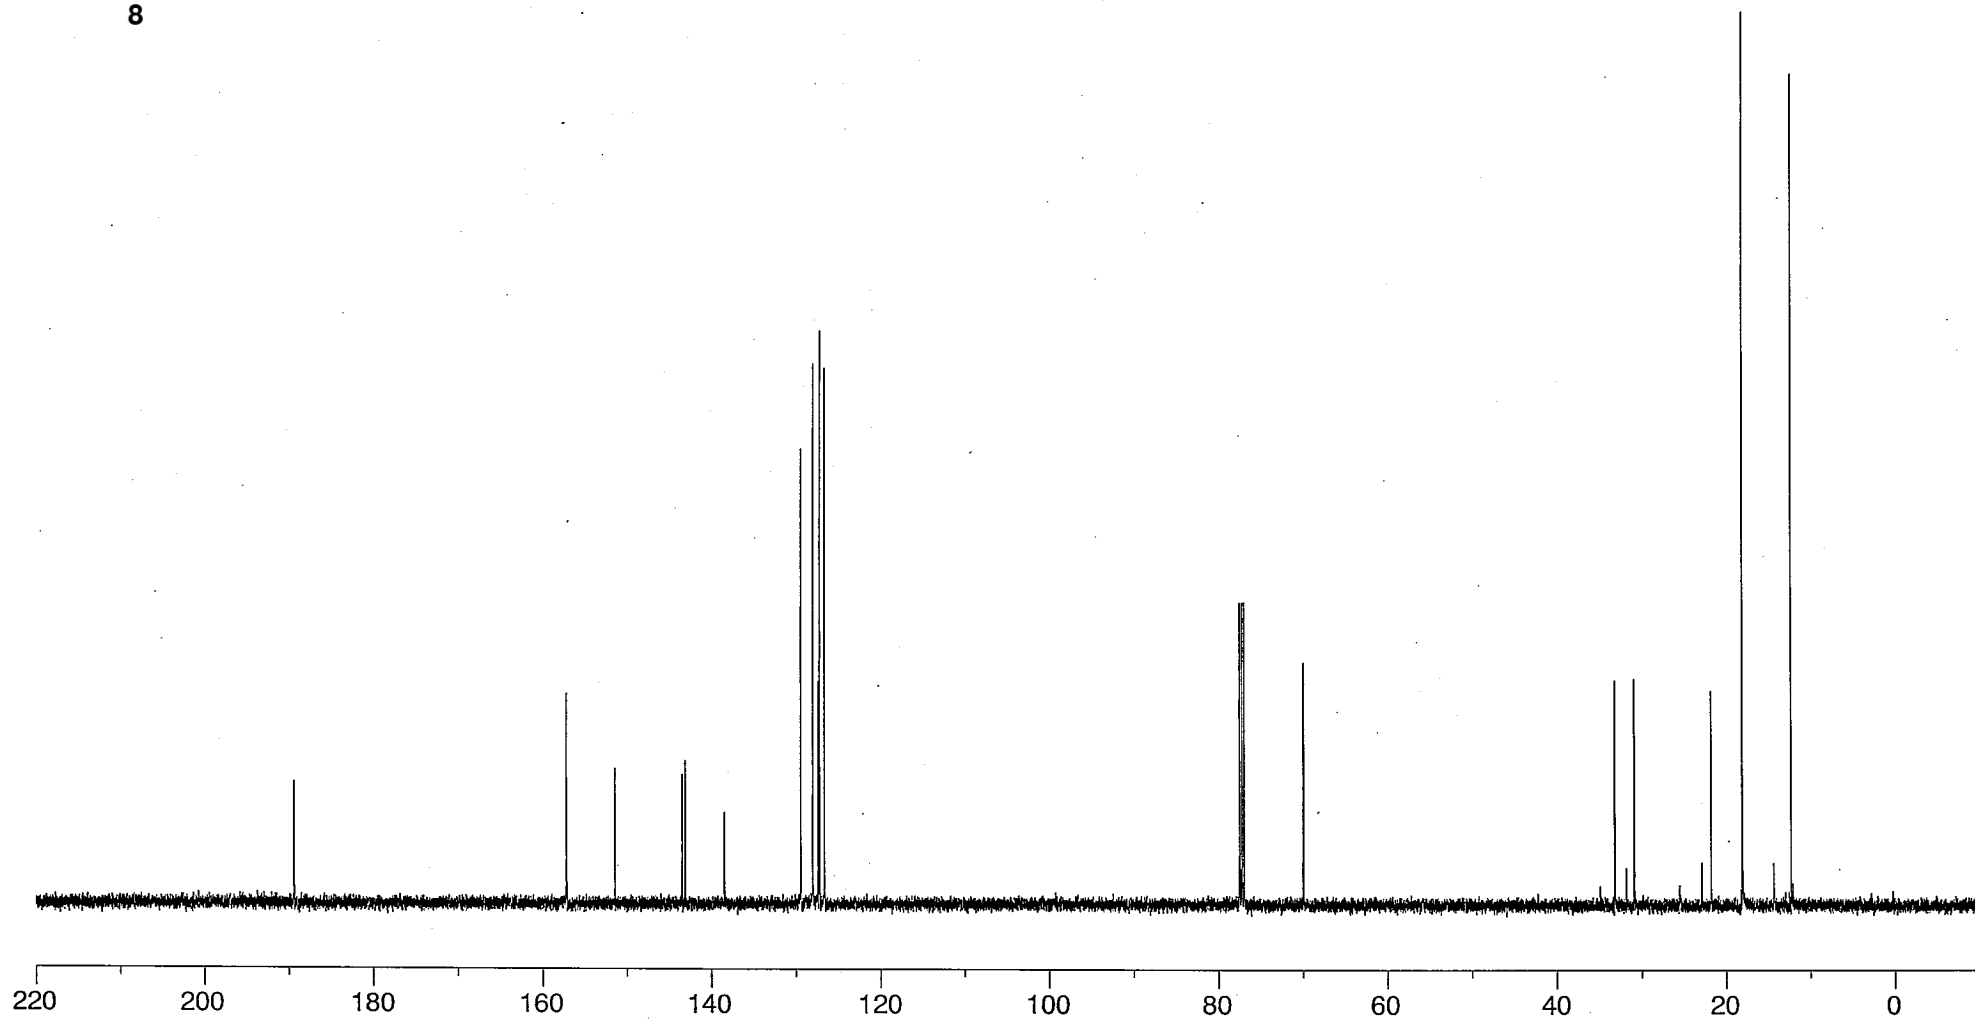

Pulse Sequence: s2pul  
Spectrometer Freq.: 399.79 MHz  
Solvent: CDCl<sub>3</sub>

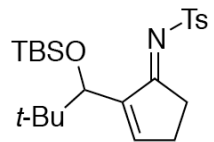

19a

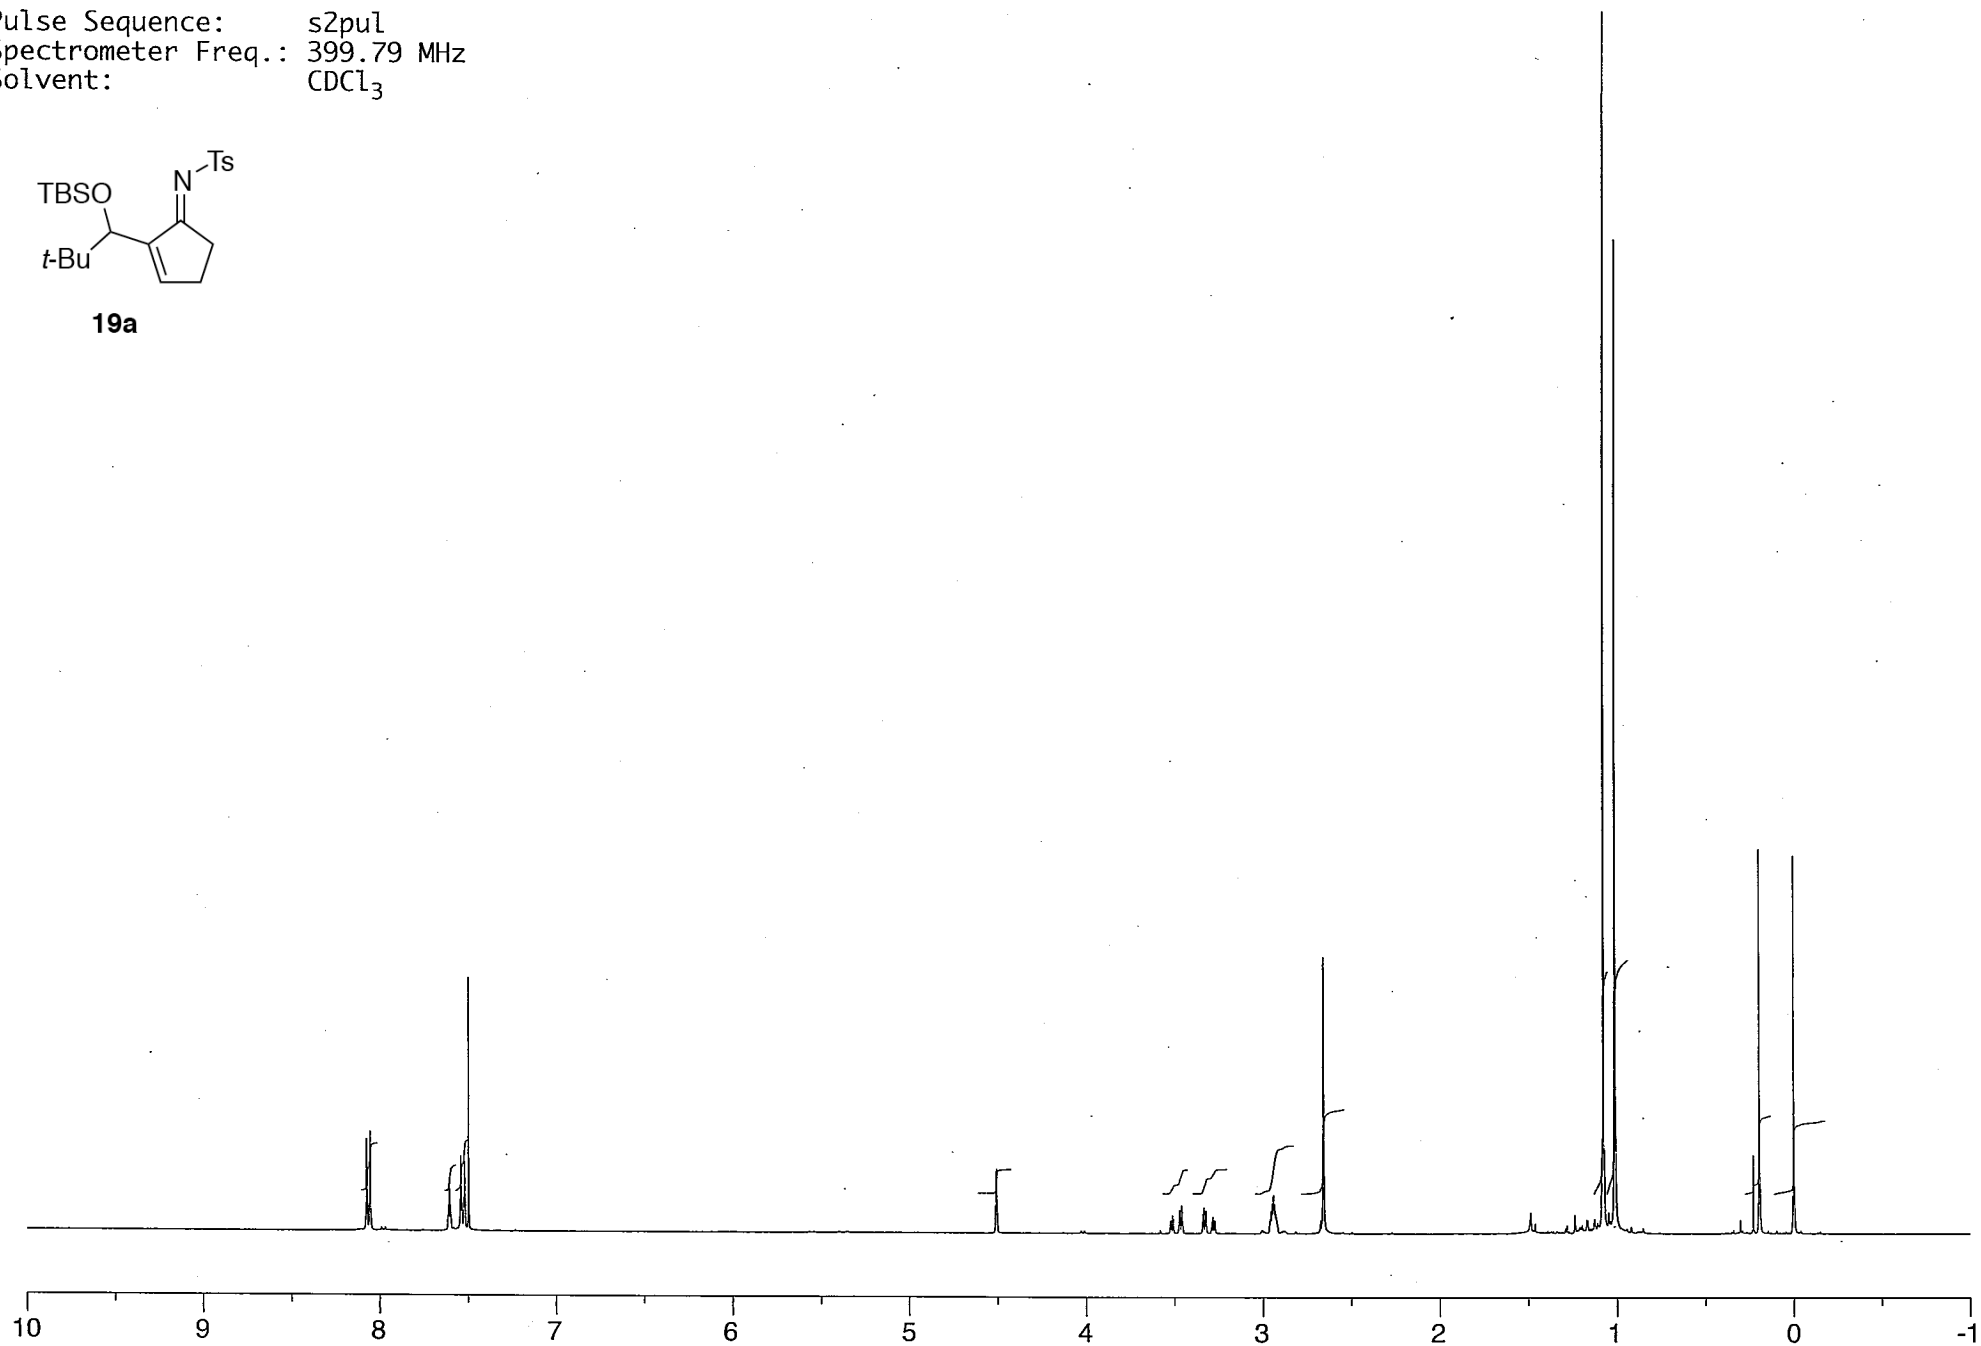

MW-1-130redo\_03Apr2012

Pulse Sequence: s2pu1  
Spectrometer Freq.: 100.54 MHz  
Solvent: CDCl<sub>3</sub>

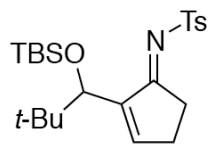

19a

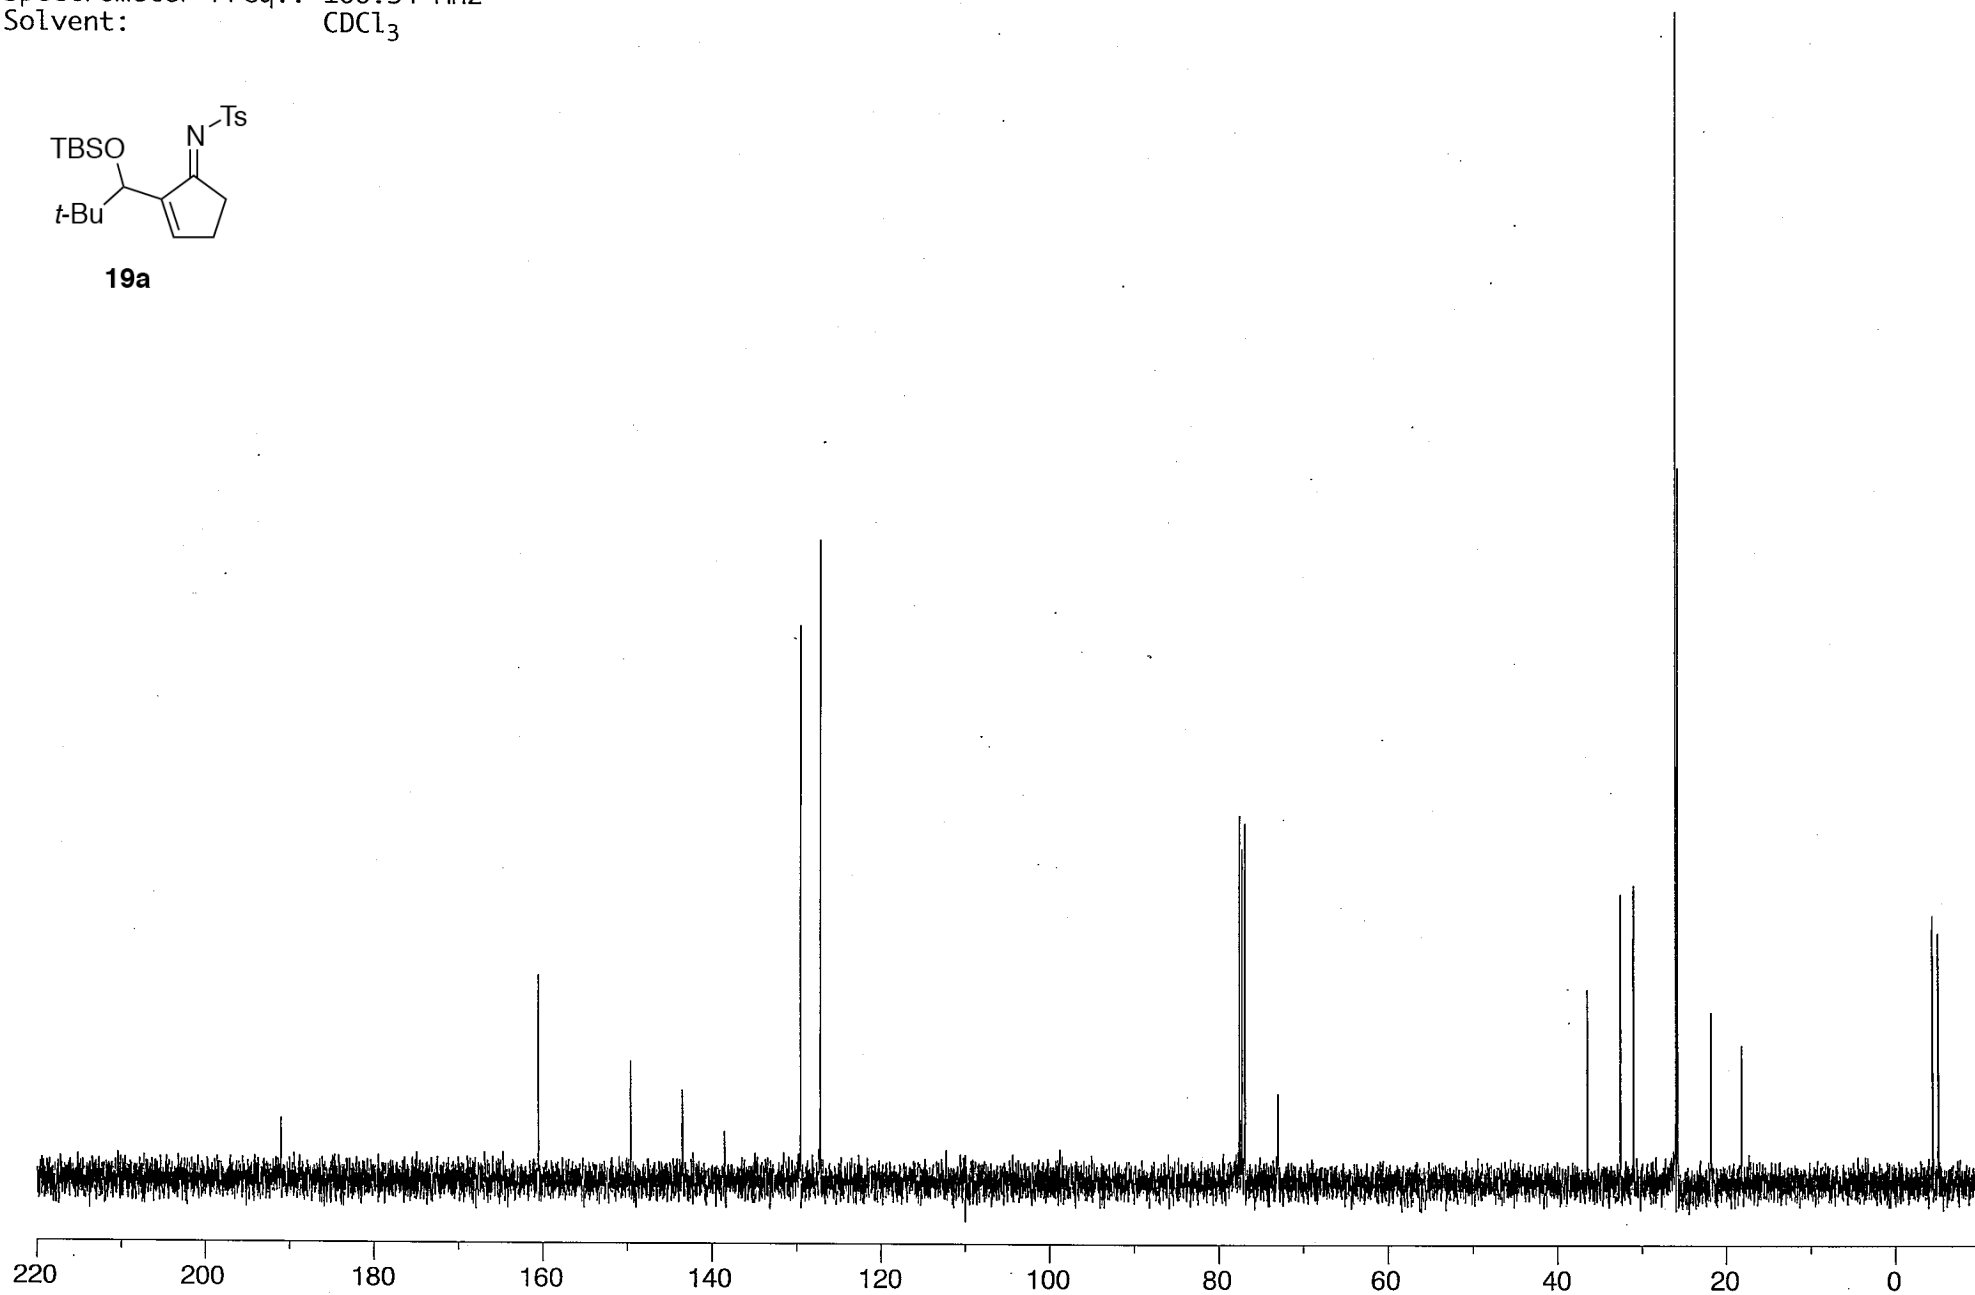

KAD-03-203\_15Oct2011

Pulse Sequence: s2pul  
Spectrometer Freq.: 499.73 MHz  
Solvent: CDCl<sub>3</sub>

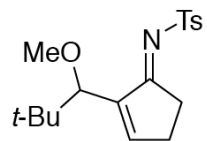

19b

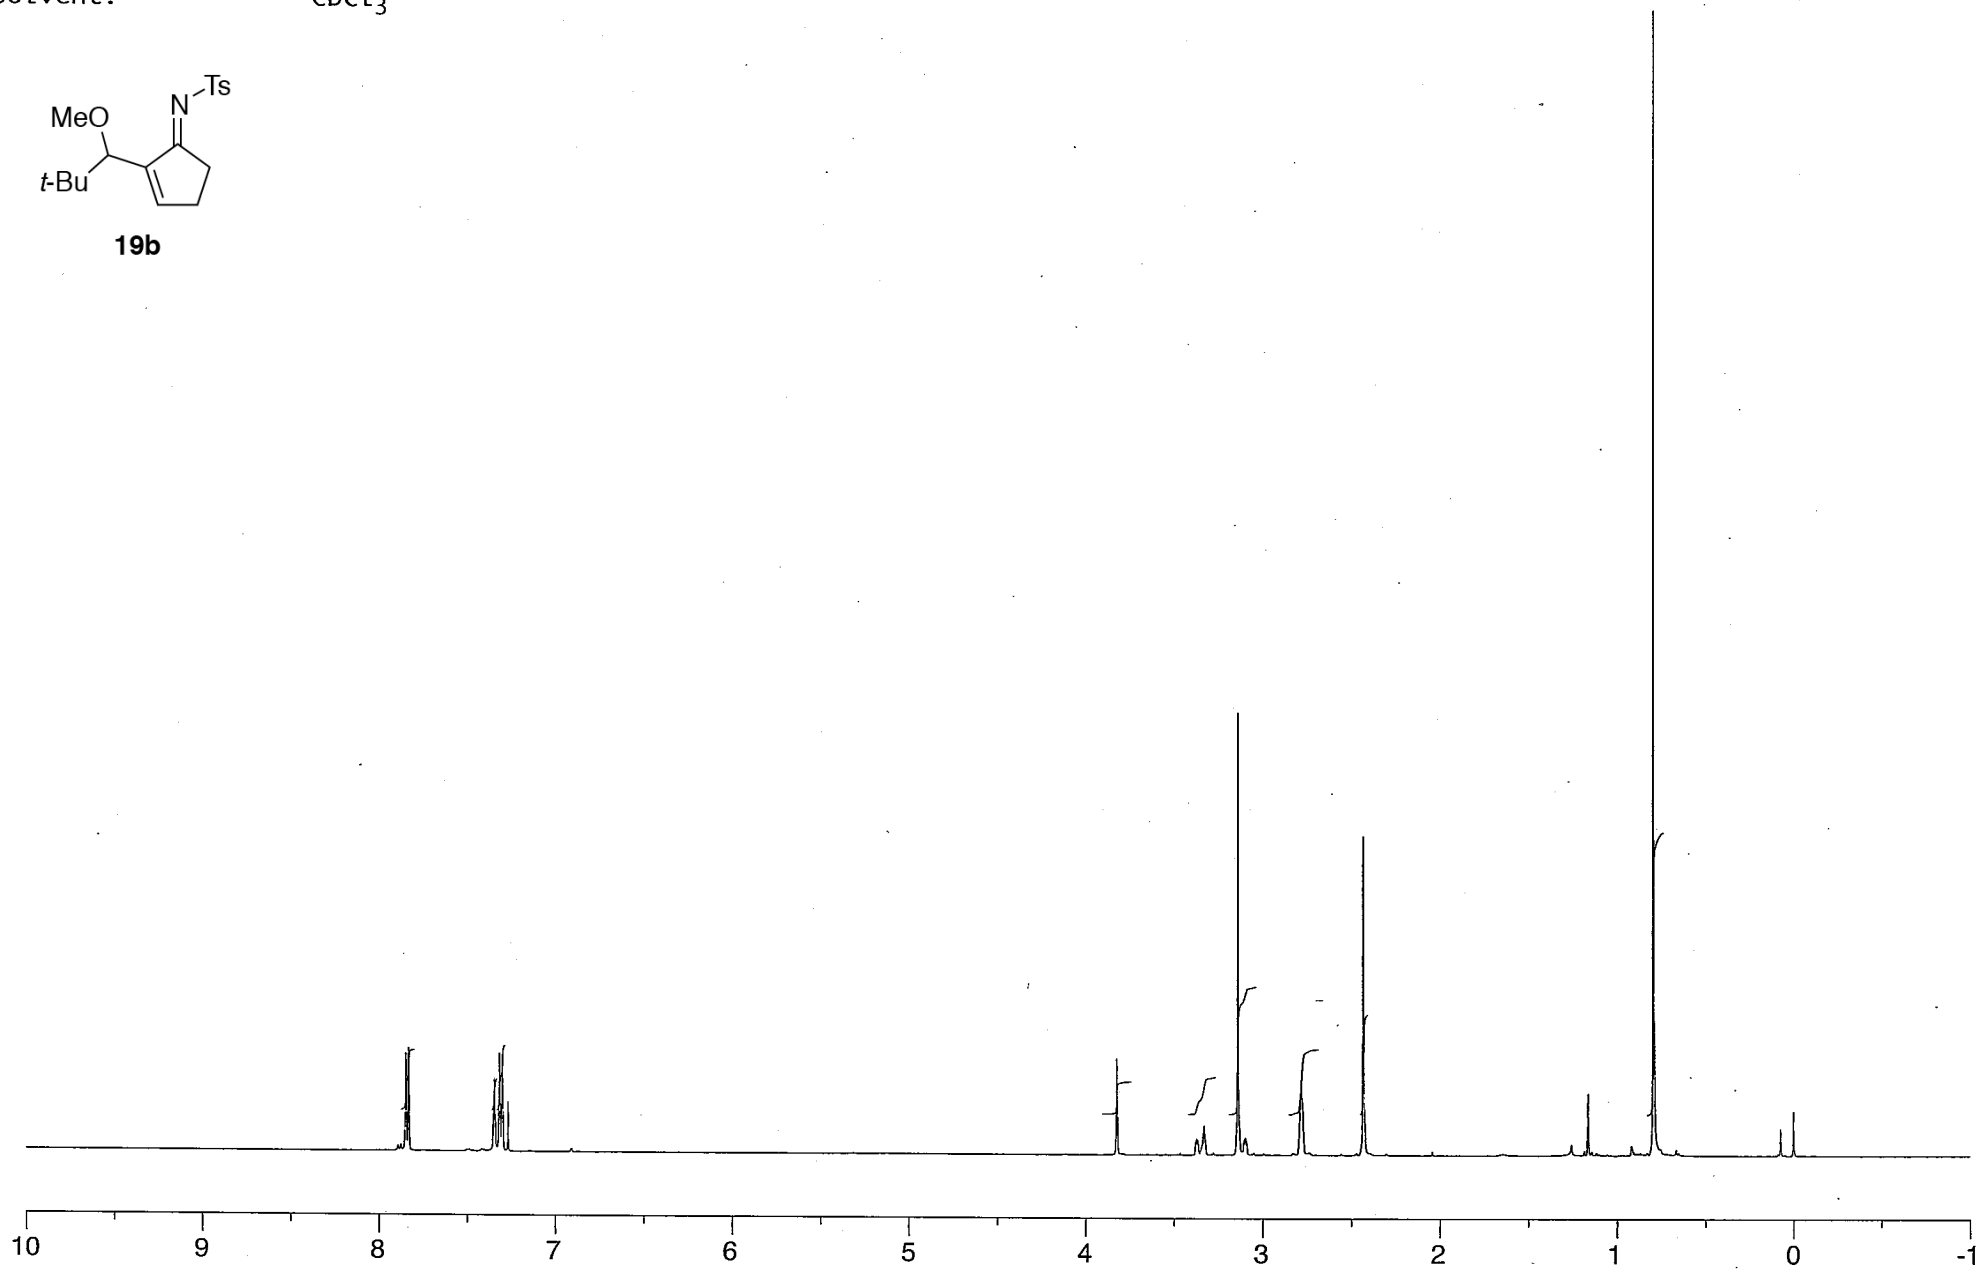



KAD-03-203\_15Oct2011

Pulse Sequence: s2pul  
Spectrometer Freq.: 125.67 MHz  
Solvent: CDCl<sub>3</sub>

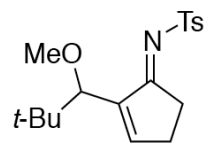

**19b**

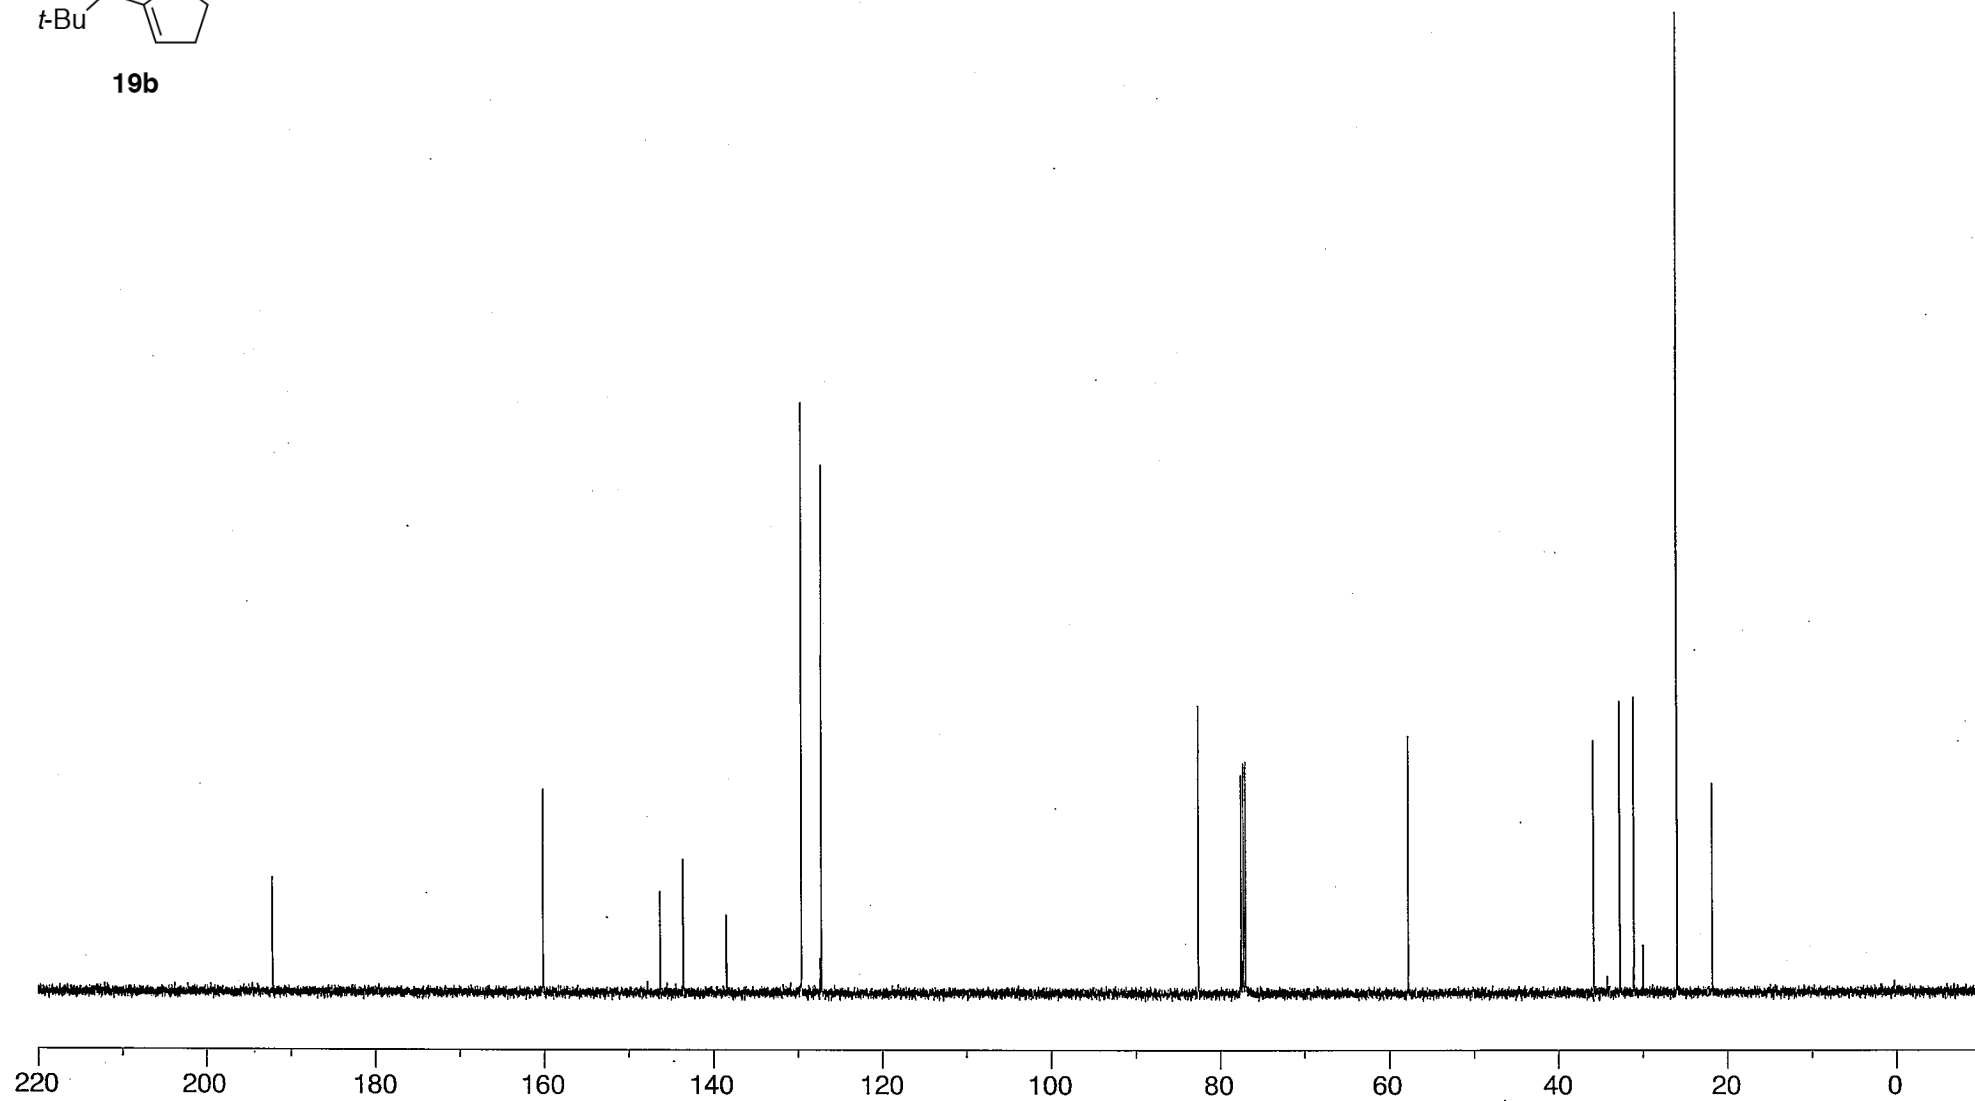

Pulse Sequence: s2pu1  
Spectrometer Freq.: 499.73 MHz  
Solvent: CDCl<sub>3</sub>

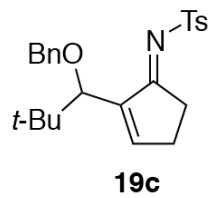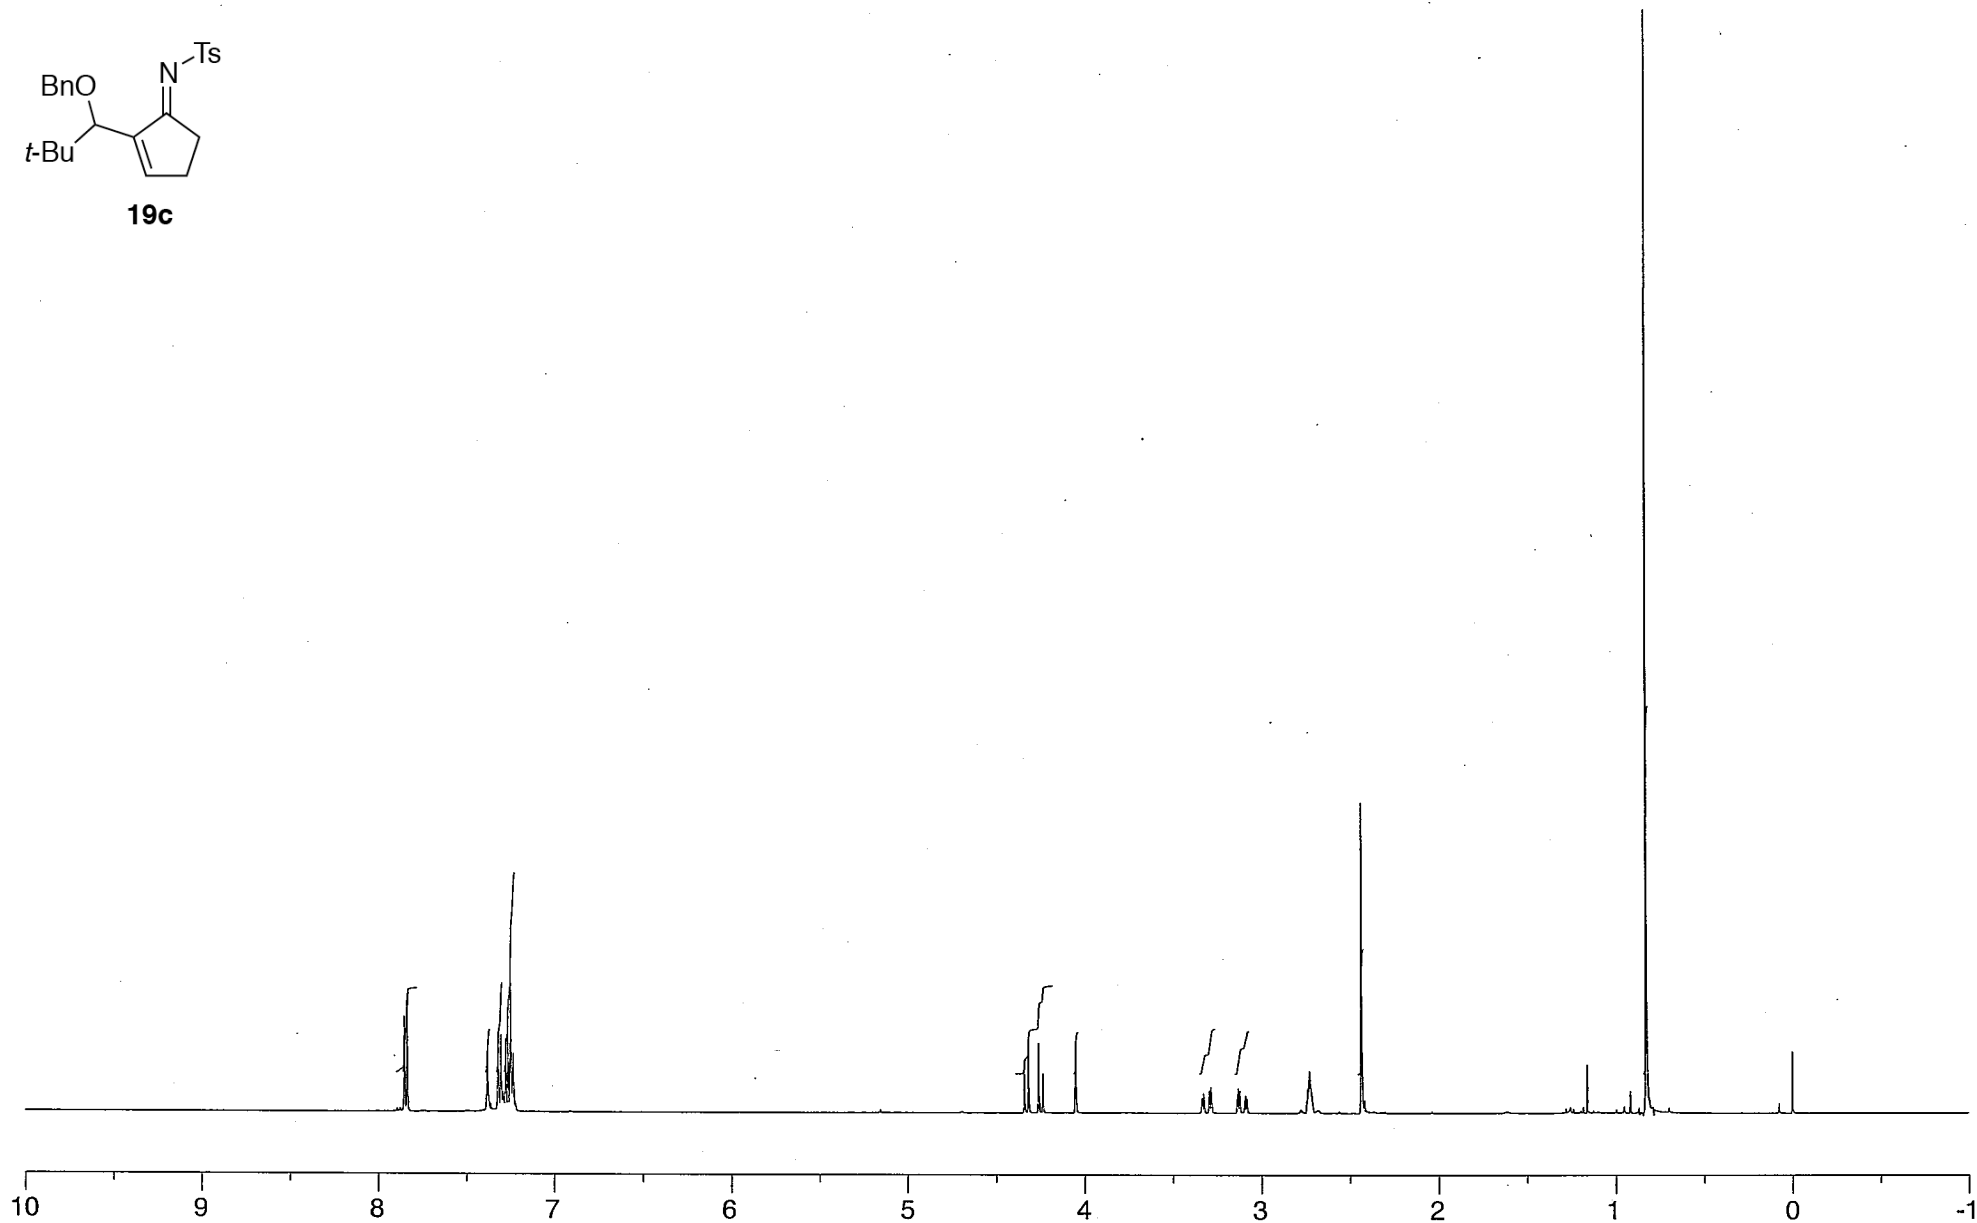

KAD-02-204\_\_15Oct2011

Pulse Sequence: s2pul  
Spectrometer Freq.: 125.67 MHz  
Solvent: CDCl<sub>3</sub>

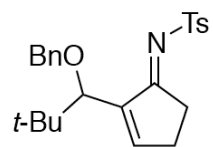

**19c**

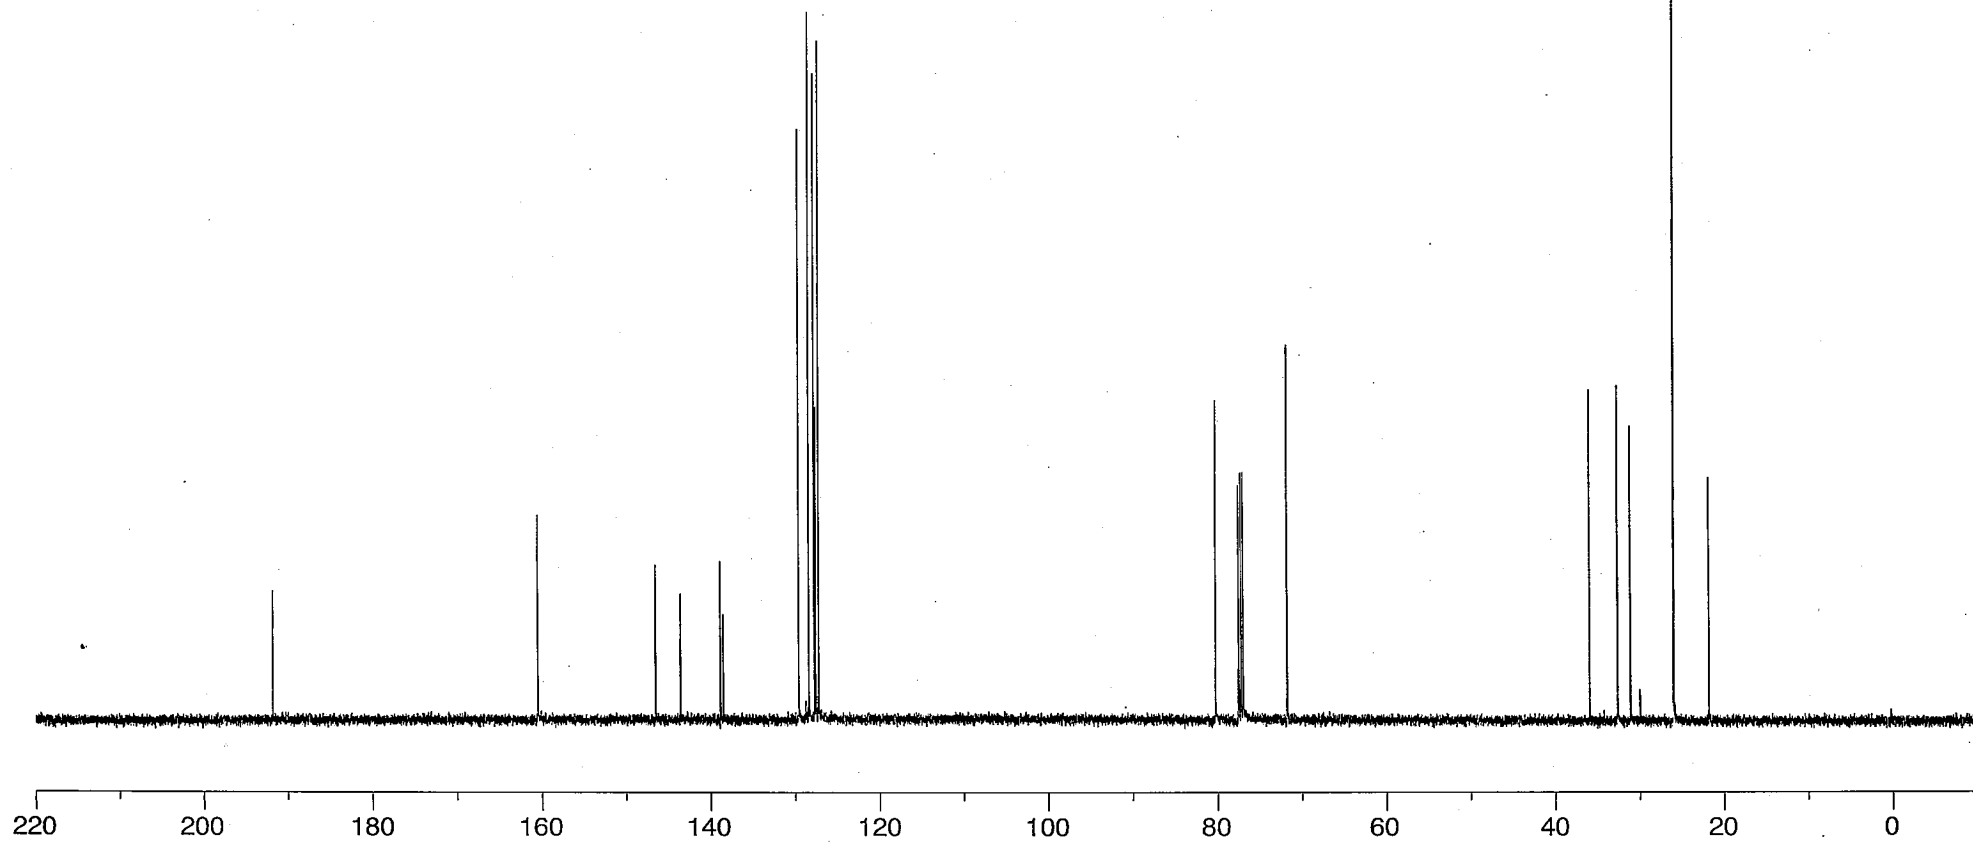

KAD-03-193\_04Oct2011

Pulse Sequence: s2pul  
Spectrometer Freq.: 399.79 MHz  
Solvent: CDCl<sub>3</sub>

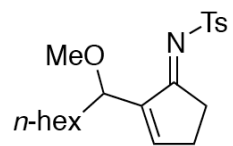

20a

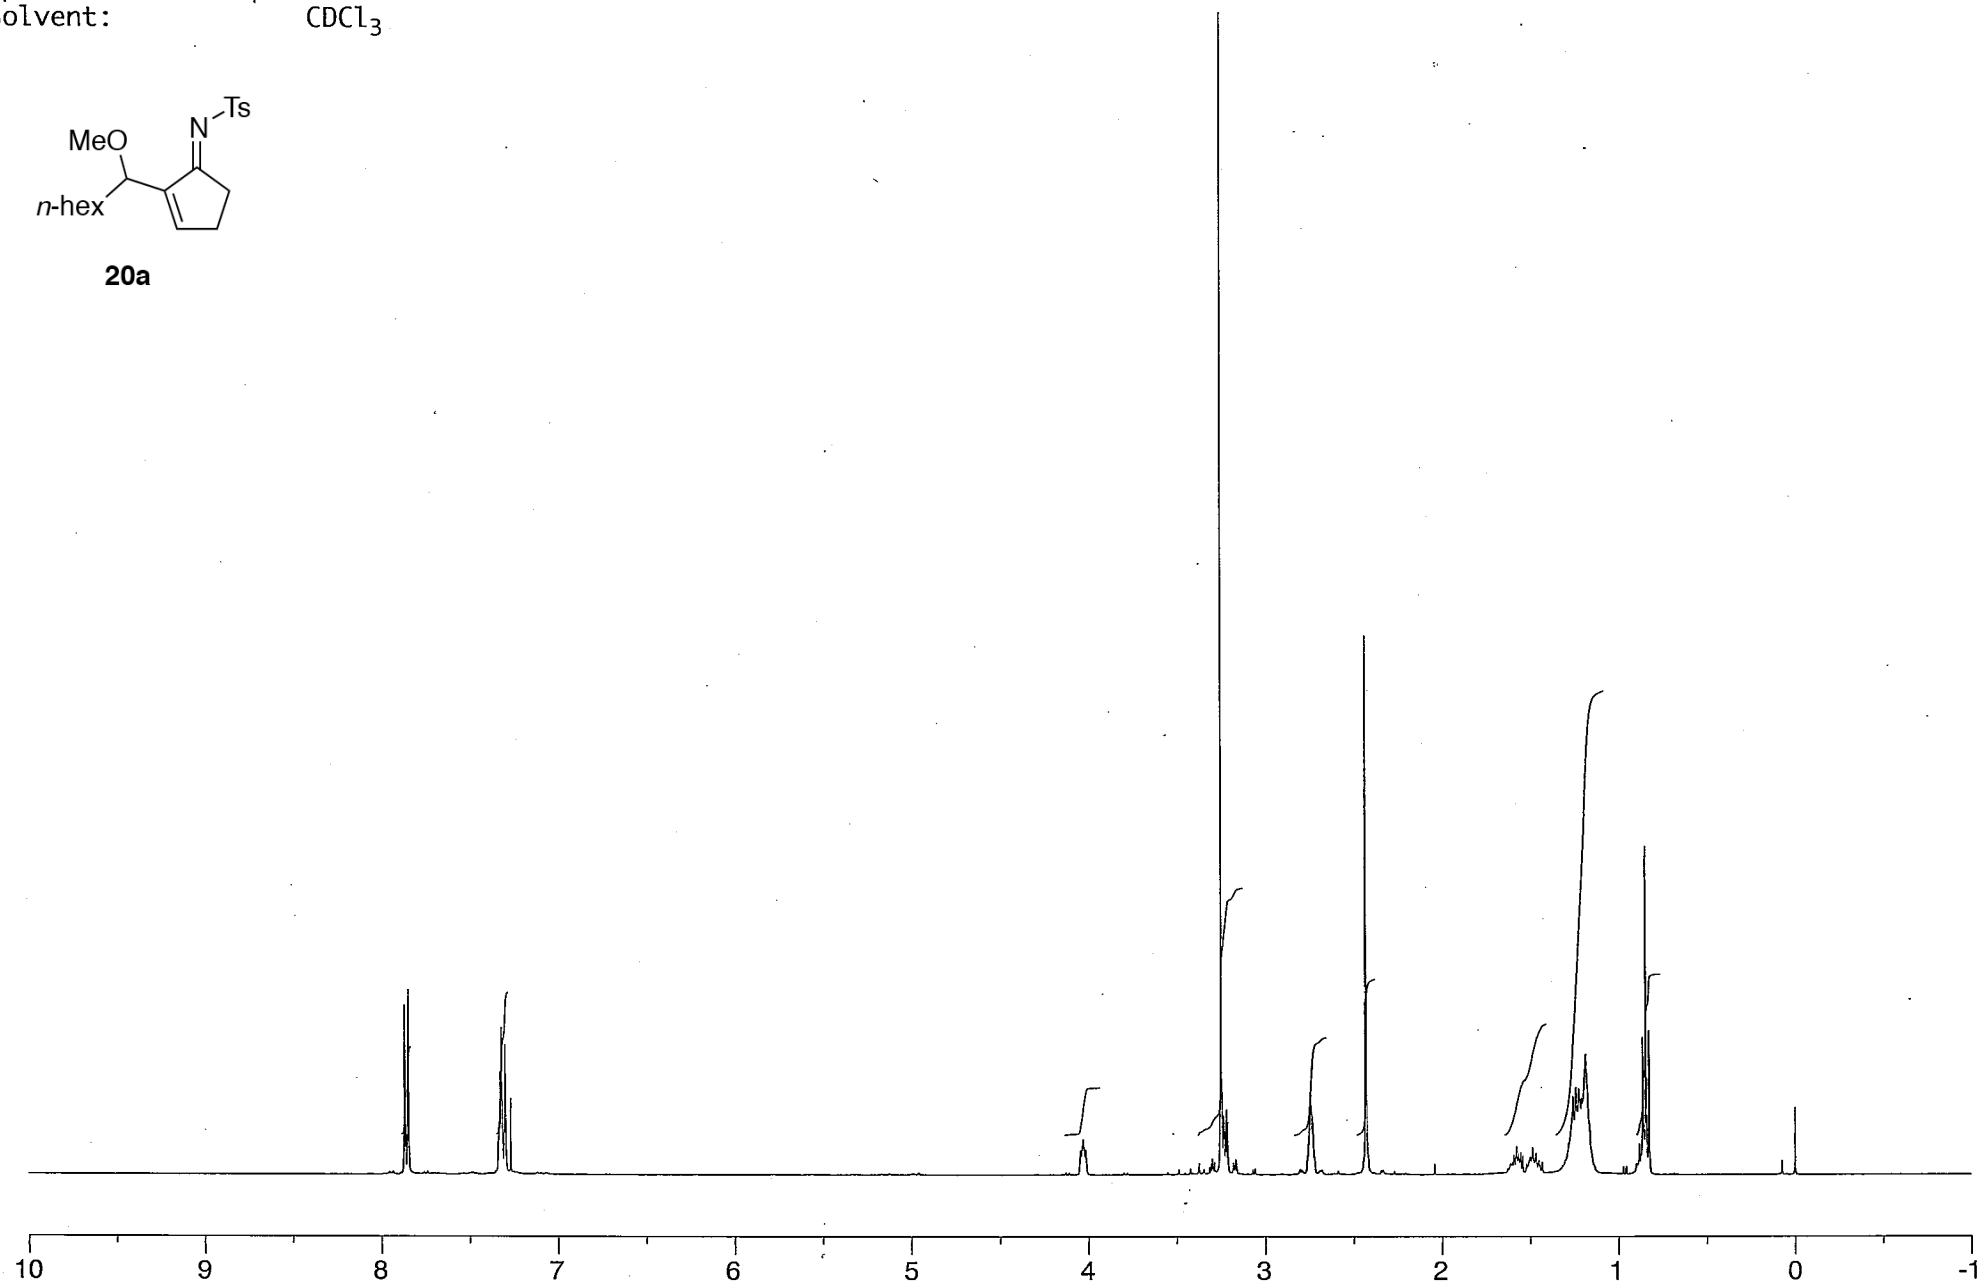

KAD-03-193\_04Oct2011

Pulse Sequence: s2pul  
Spectrometer Freq.: 100.54 MHz  
Solvent: CDCl<sub>3</sub>

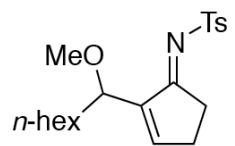

20a

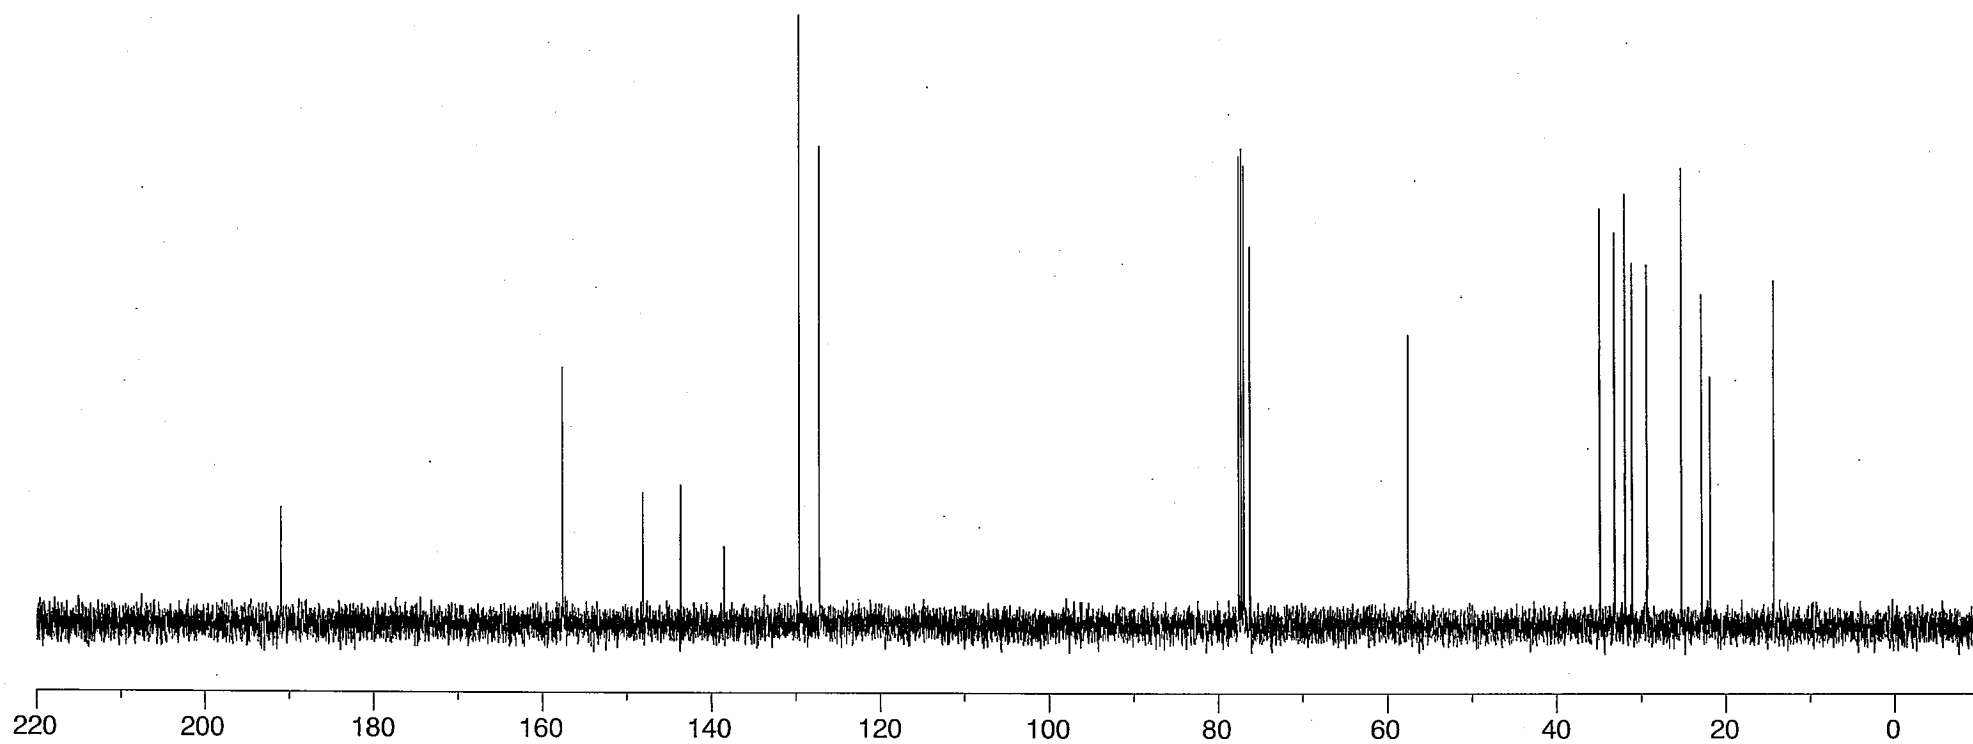

Pulse Sequence: s2pul  
Spectrometer Freq.: 499.73 MHz  
Solvent: CDCl<sub>3</sub>

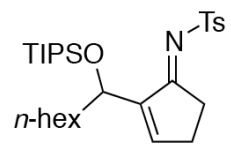**20b**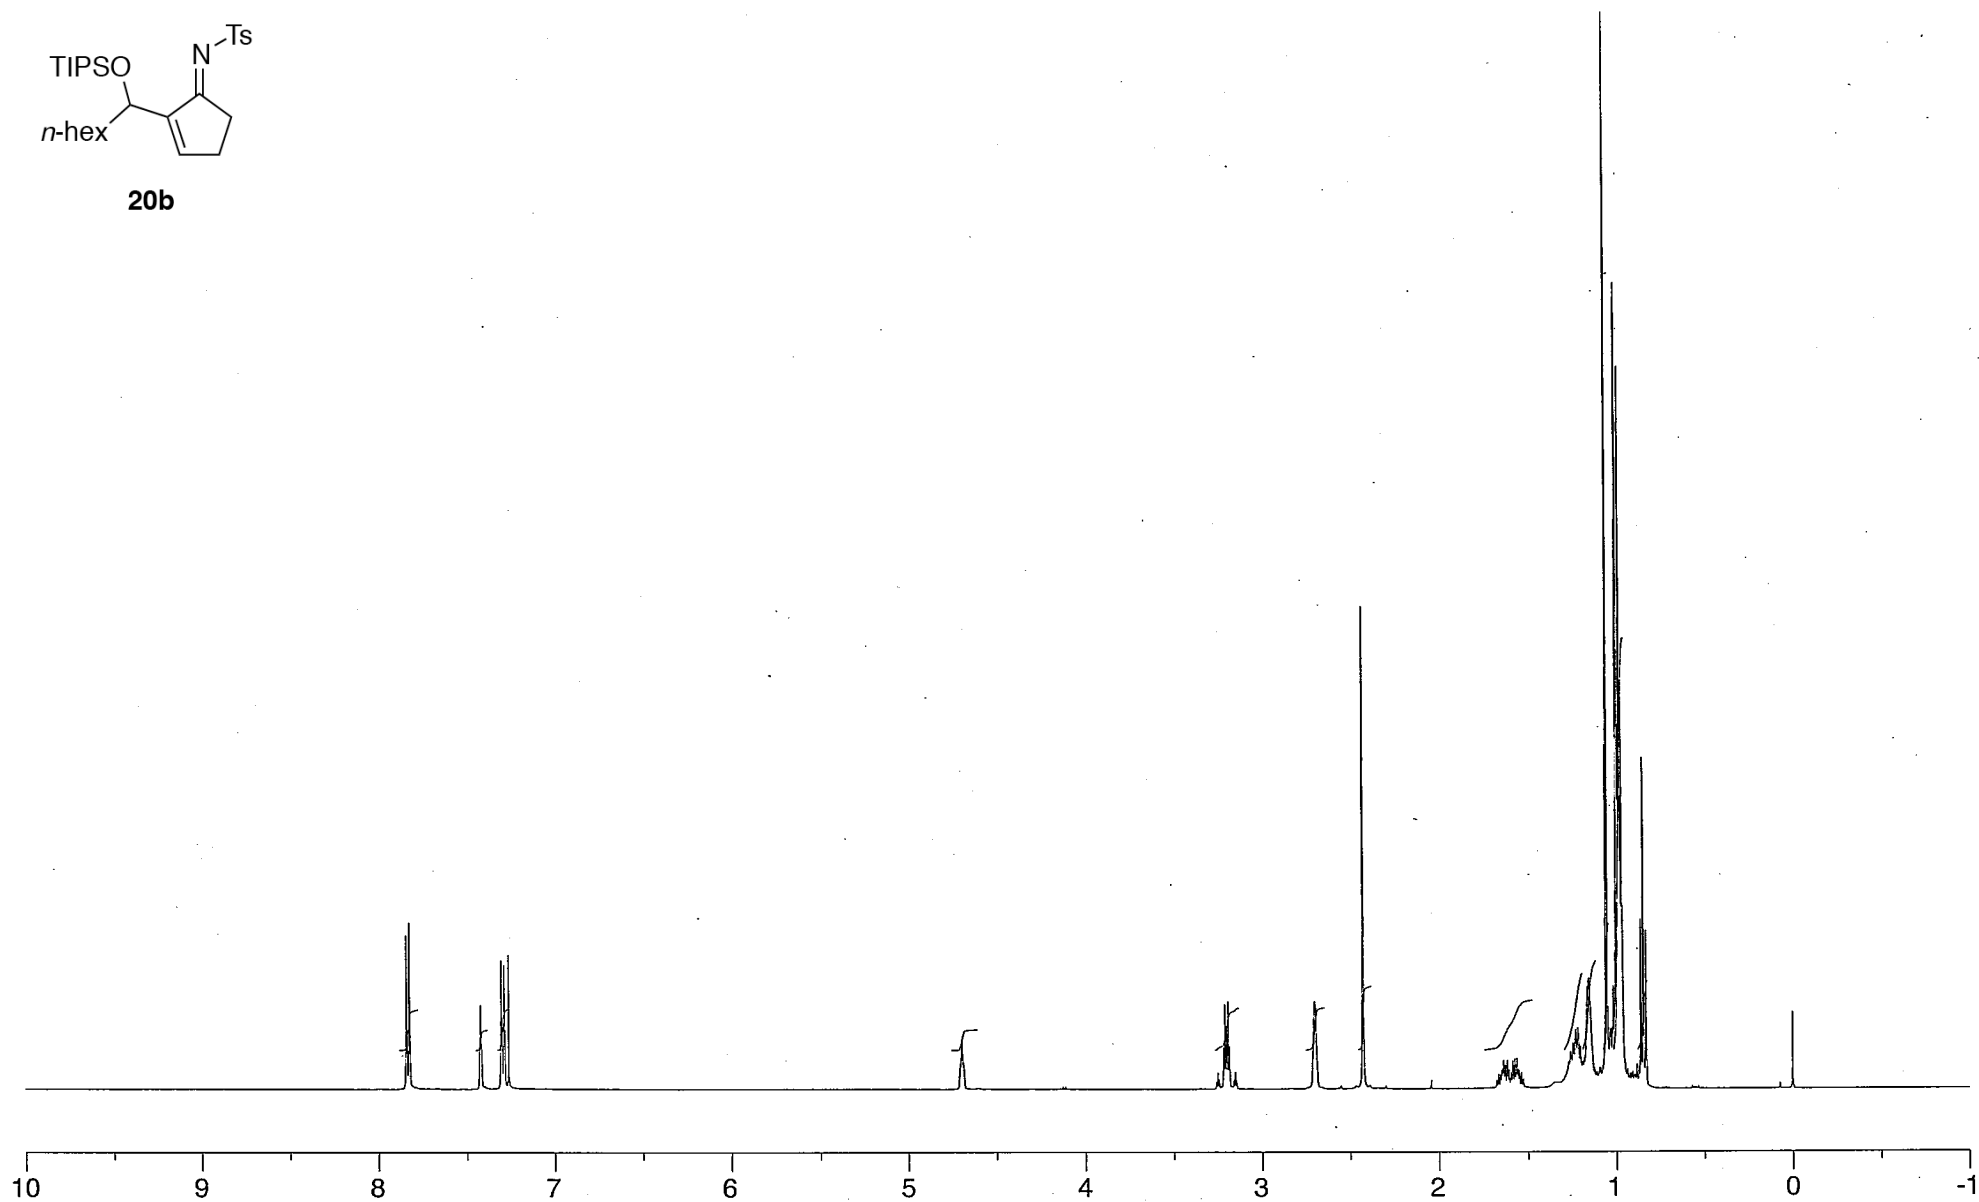

KAD-03-192\_04Oct2011

Pulse Sequence: s2pul  
Spectrometer Freq.: 125.67 MHz  
Solvent: CDCl<sub>3</sub>

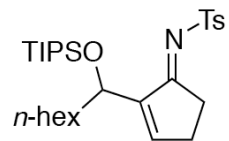

20b

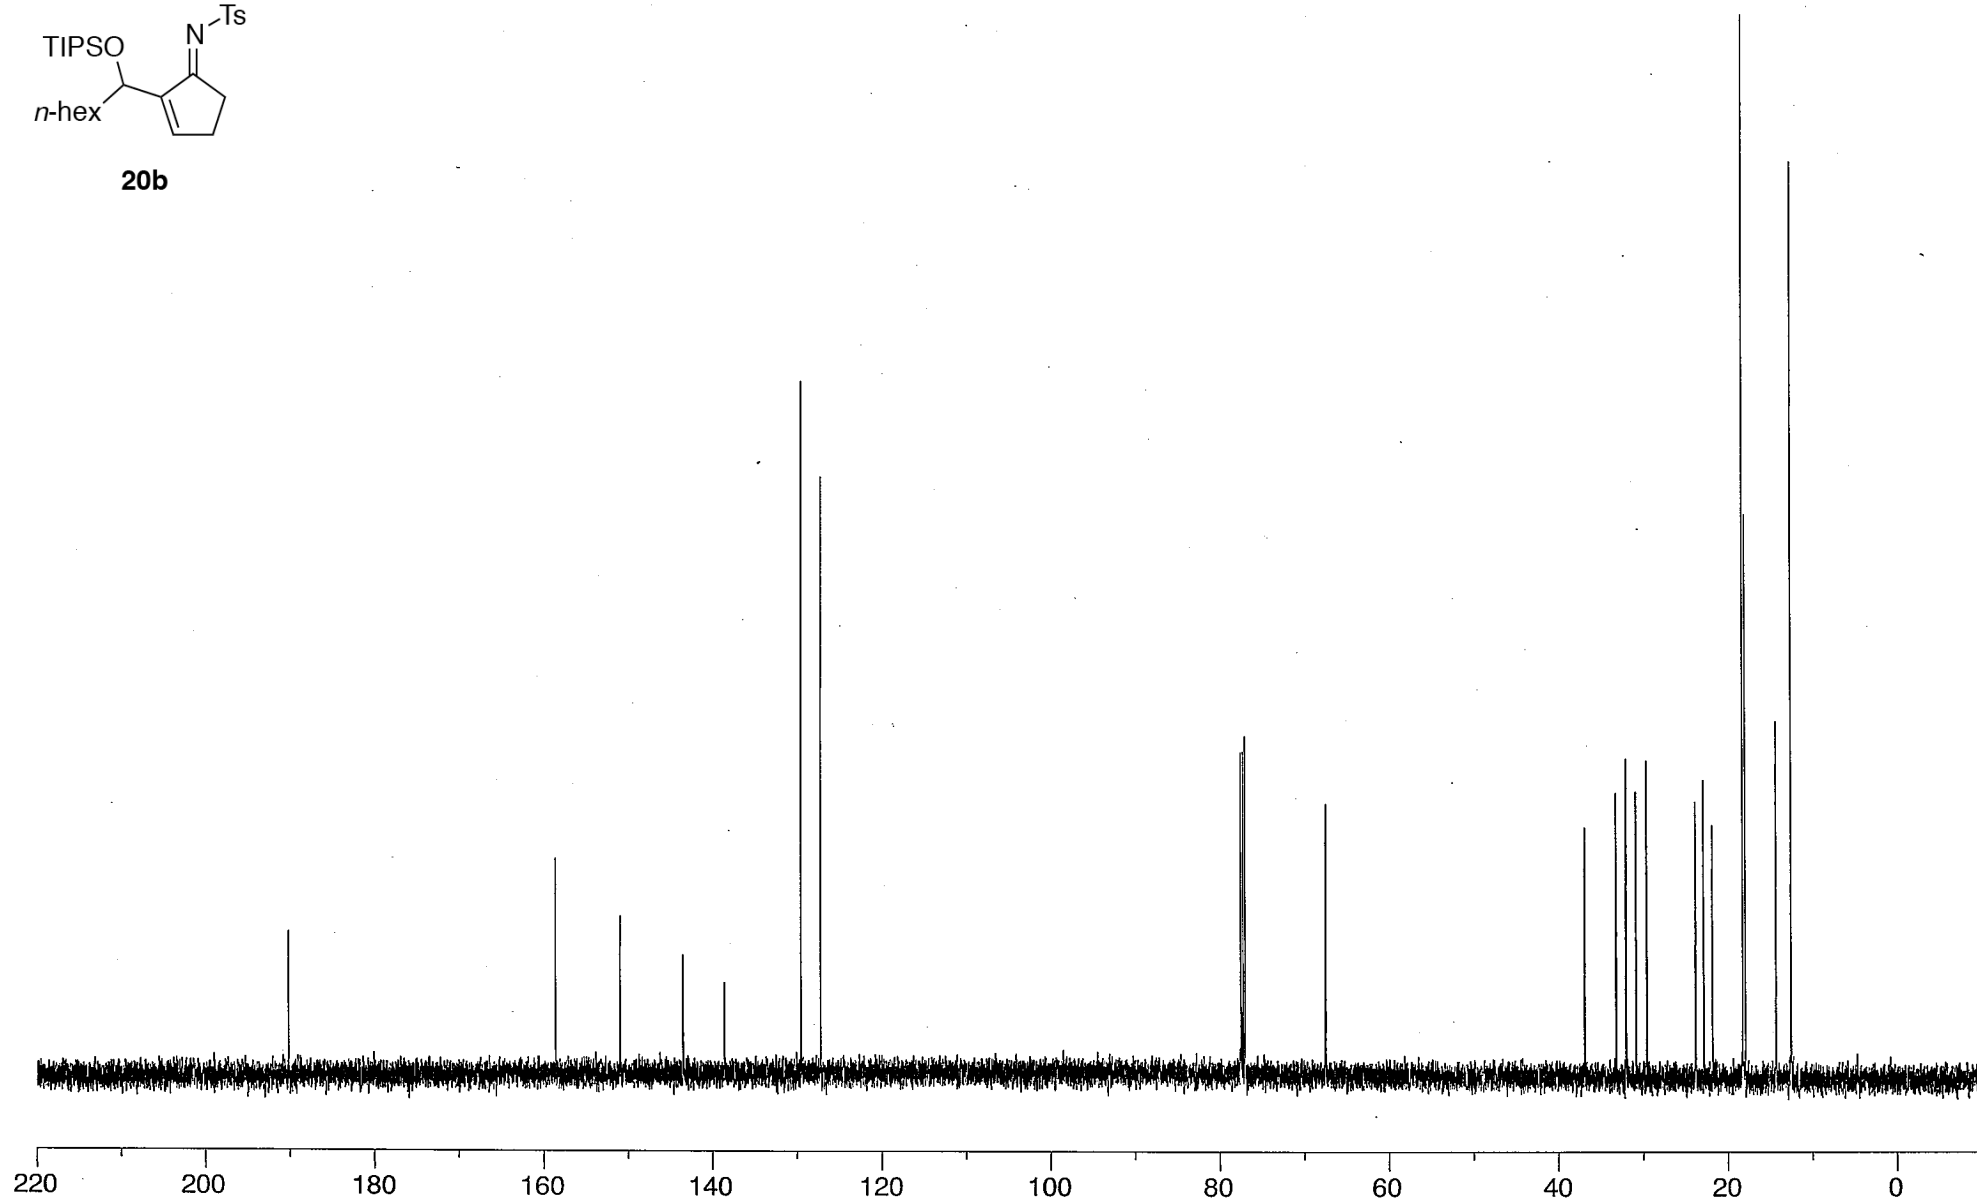

KAD-03-213\_24Oct2011

Pulse Sequence: s2pu1  
Spectrometer Freq.: 399.79 MHz  
Solvent: CDCl<sub>3</sub>

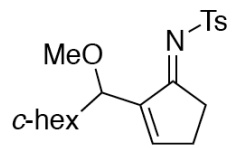

**21a**

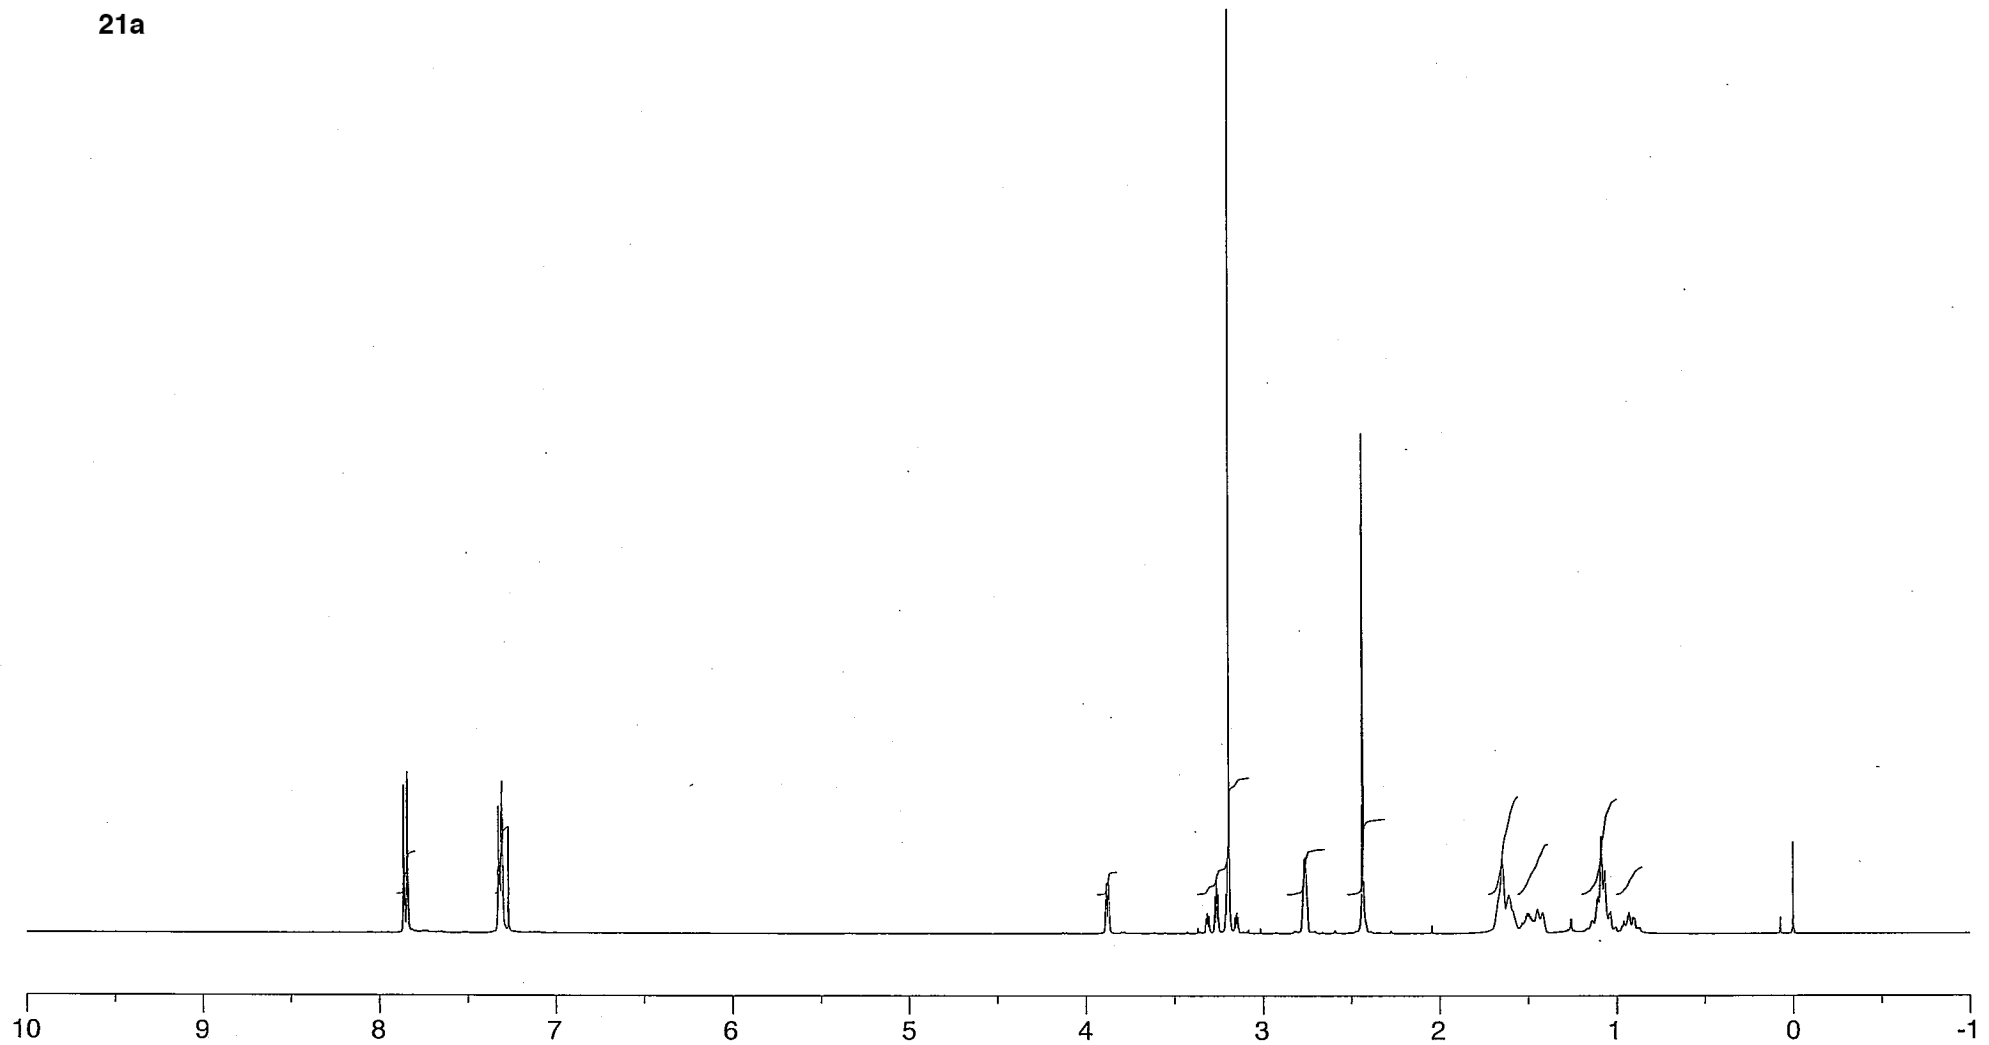



Pulse Sequence: s2pu1  
Spectrometer Freq.: 100.54 MHz  
Solvent: CDCl<sub>3</sub>

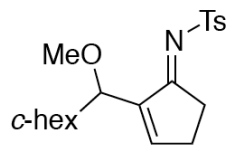

21a

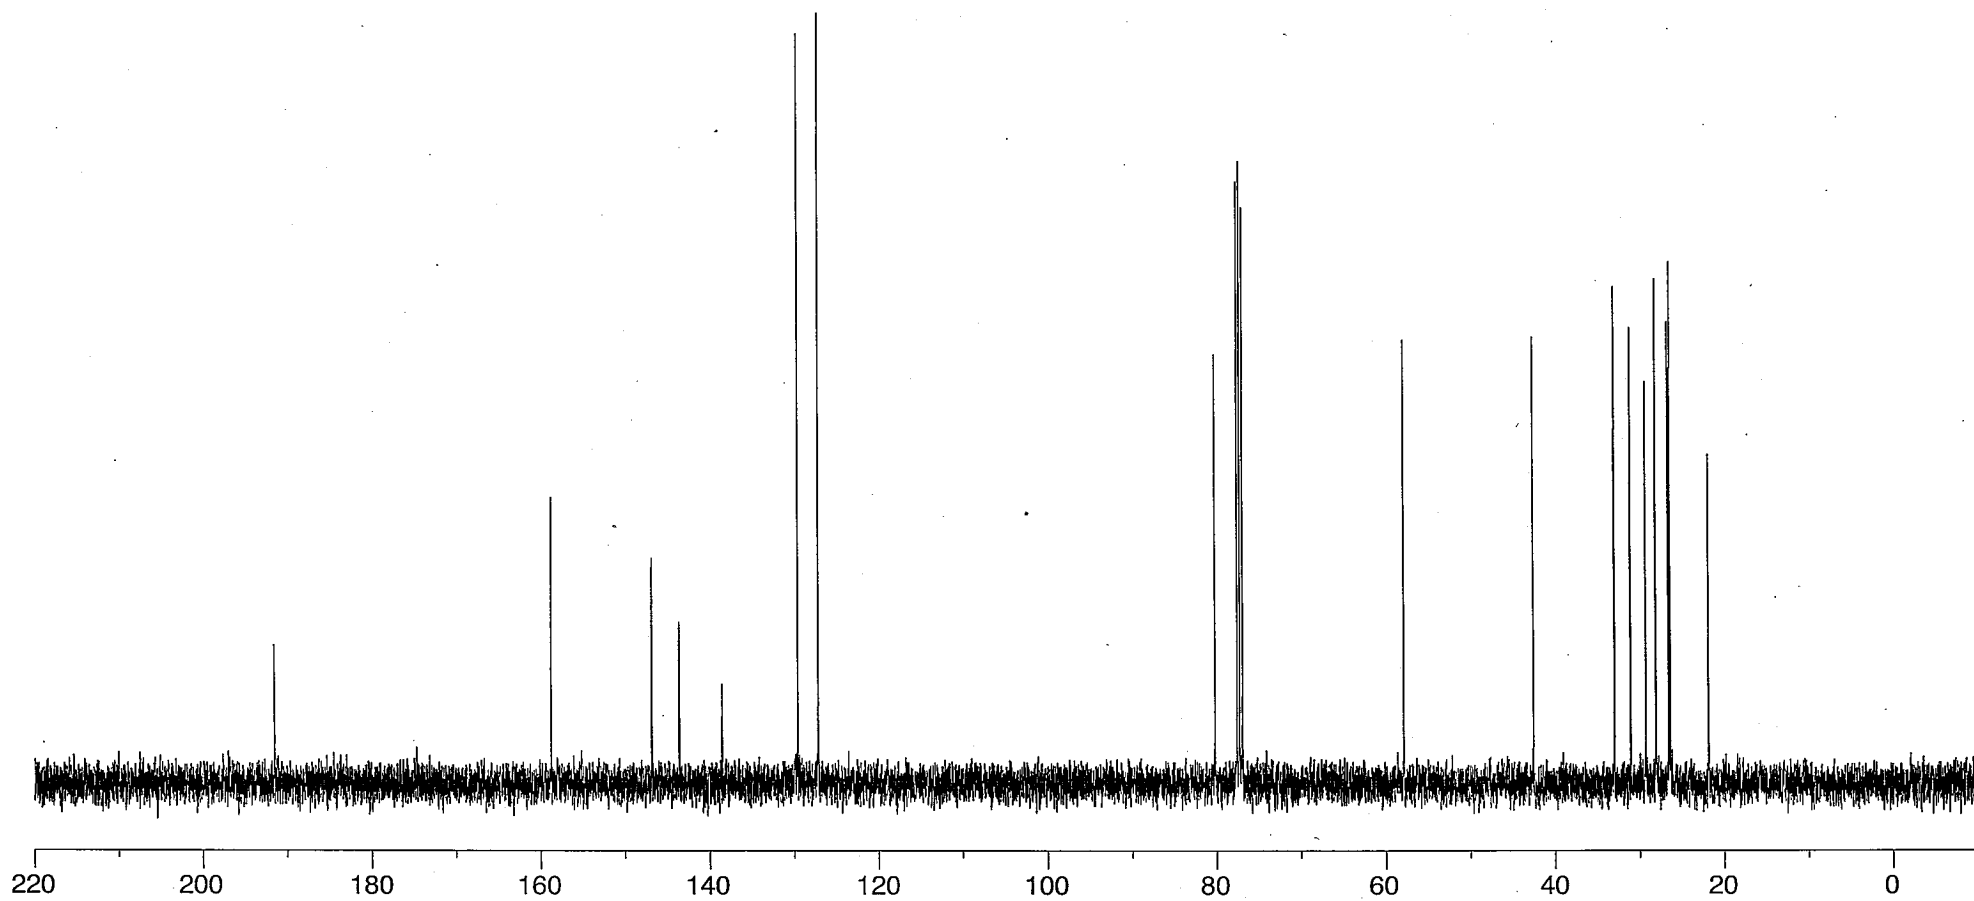

KAD-03-214\_24Oct2011

Pulse Sequence: s2pul  
Spectrometer Freq.: 399.79 MHz  
Solvent: CDCl<sub>3</sub>

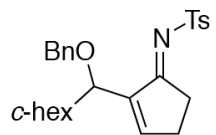

21b

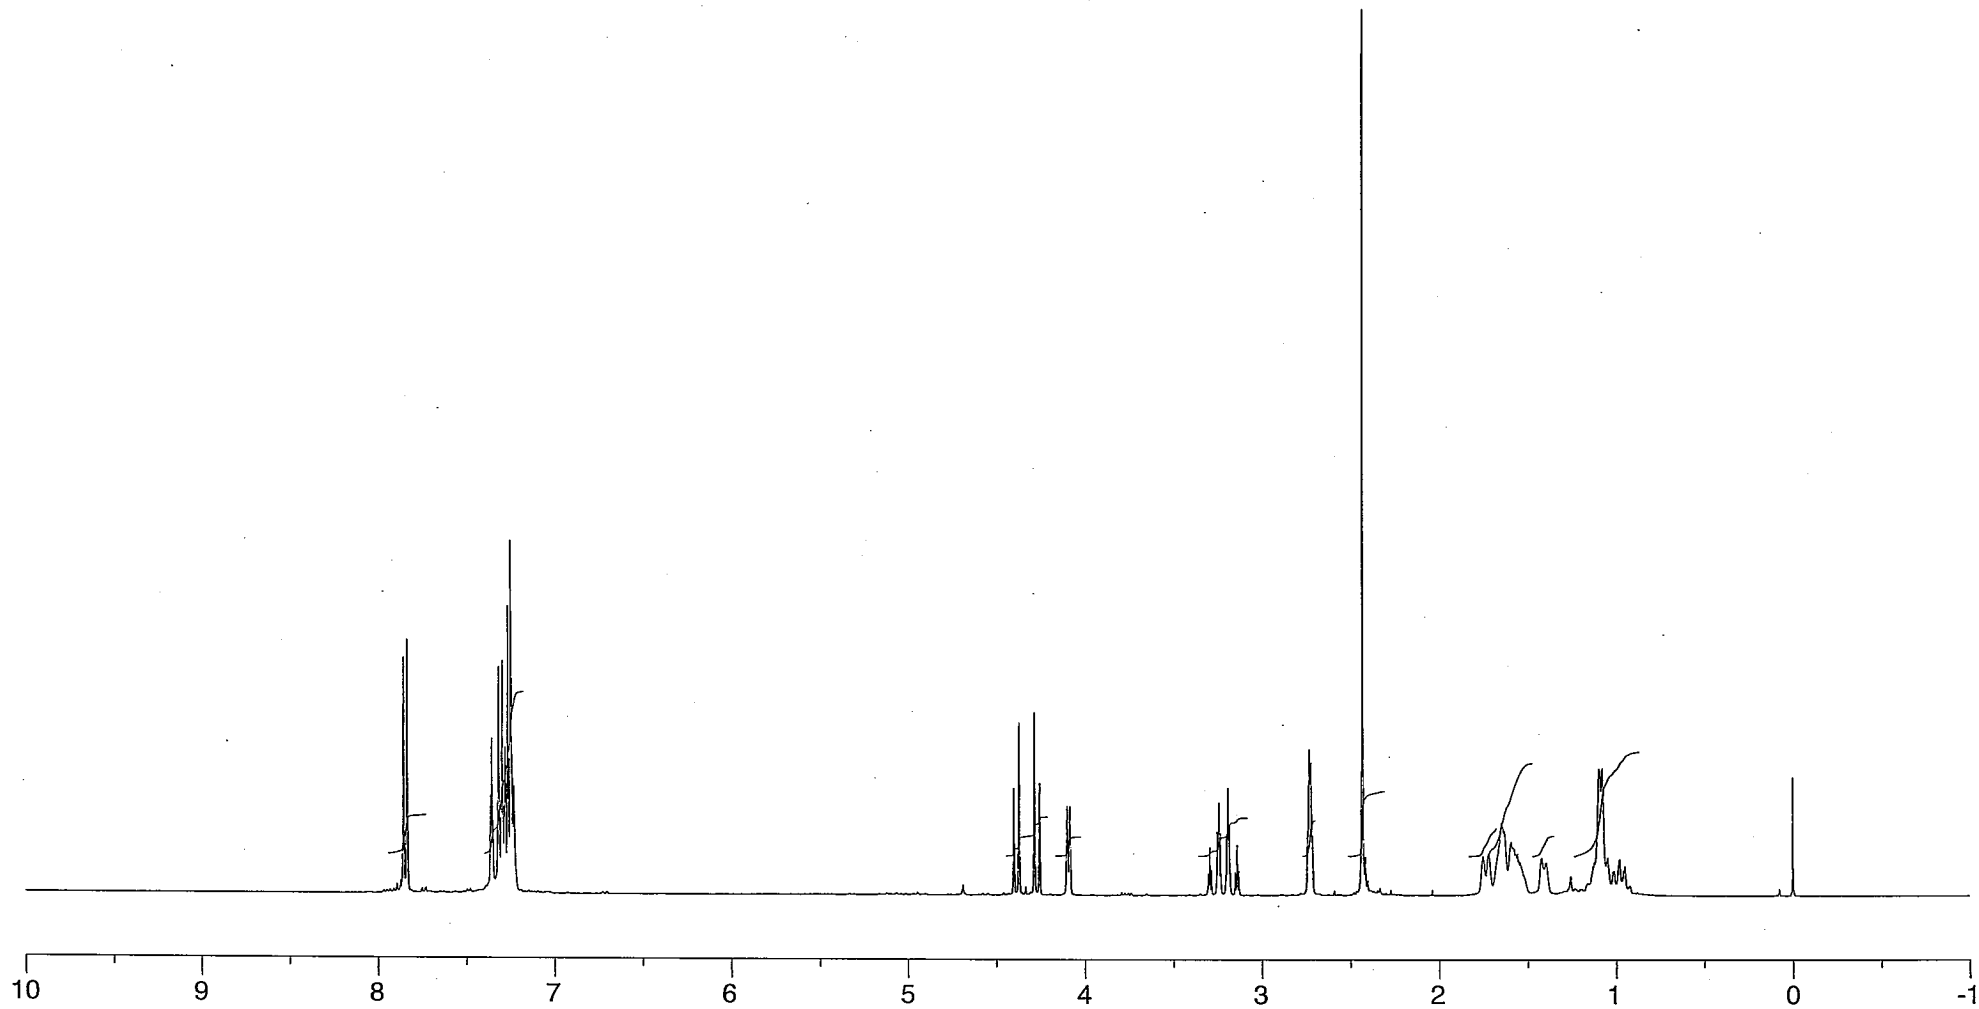

KAD-03-214\_24Oct2011

Pulse Sequence: s2pu1  
Spectrometer Freq.: 100.54 MHz  
Solvent: CDCl<sub>3</sub>

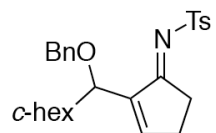

21b

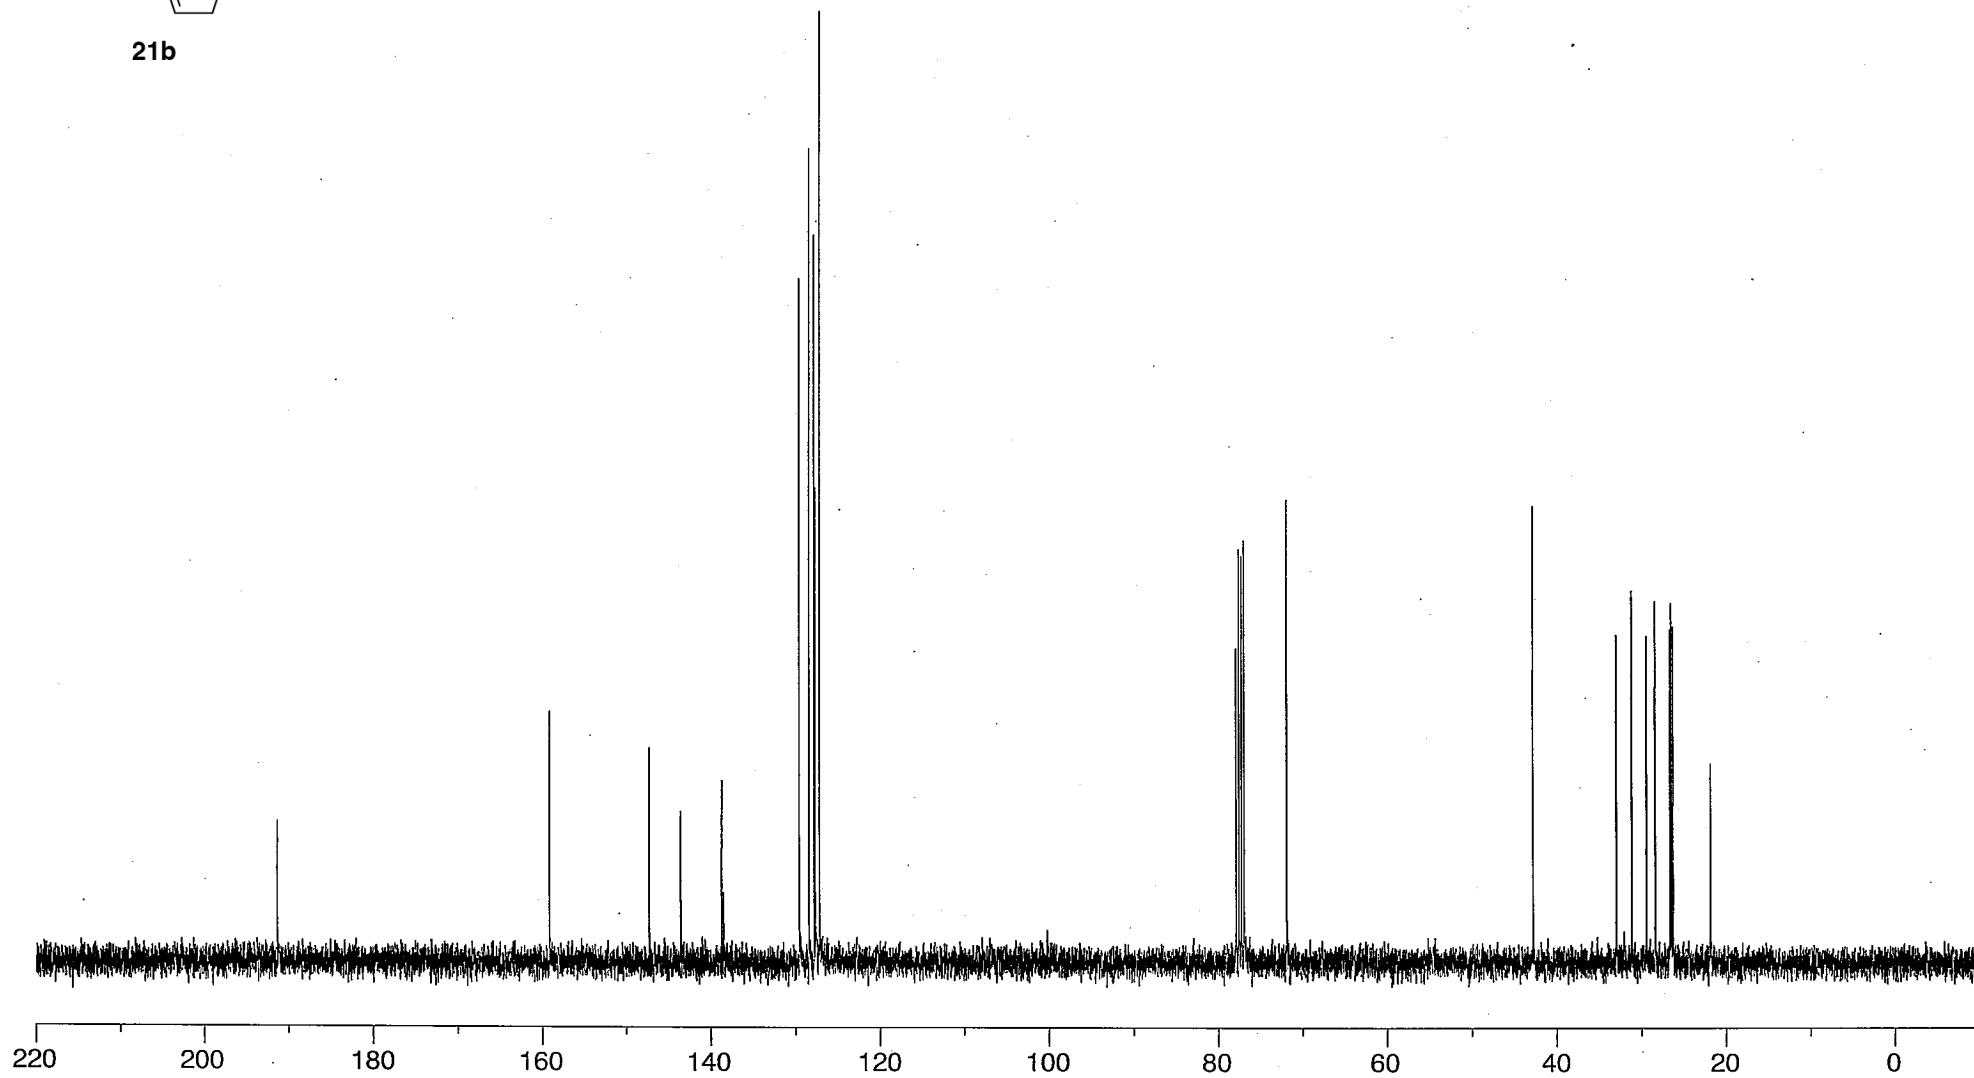

gwm-l-68\_28Jul2011

Pulse Sequence: s2pul  
Spectrometer Freq.: 399.79 MHz  
Solvent: CDCl<sub>3</sub>

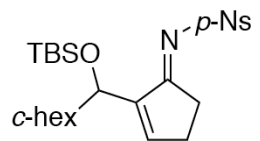

22a

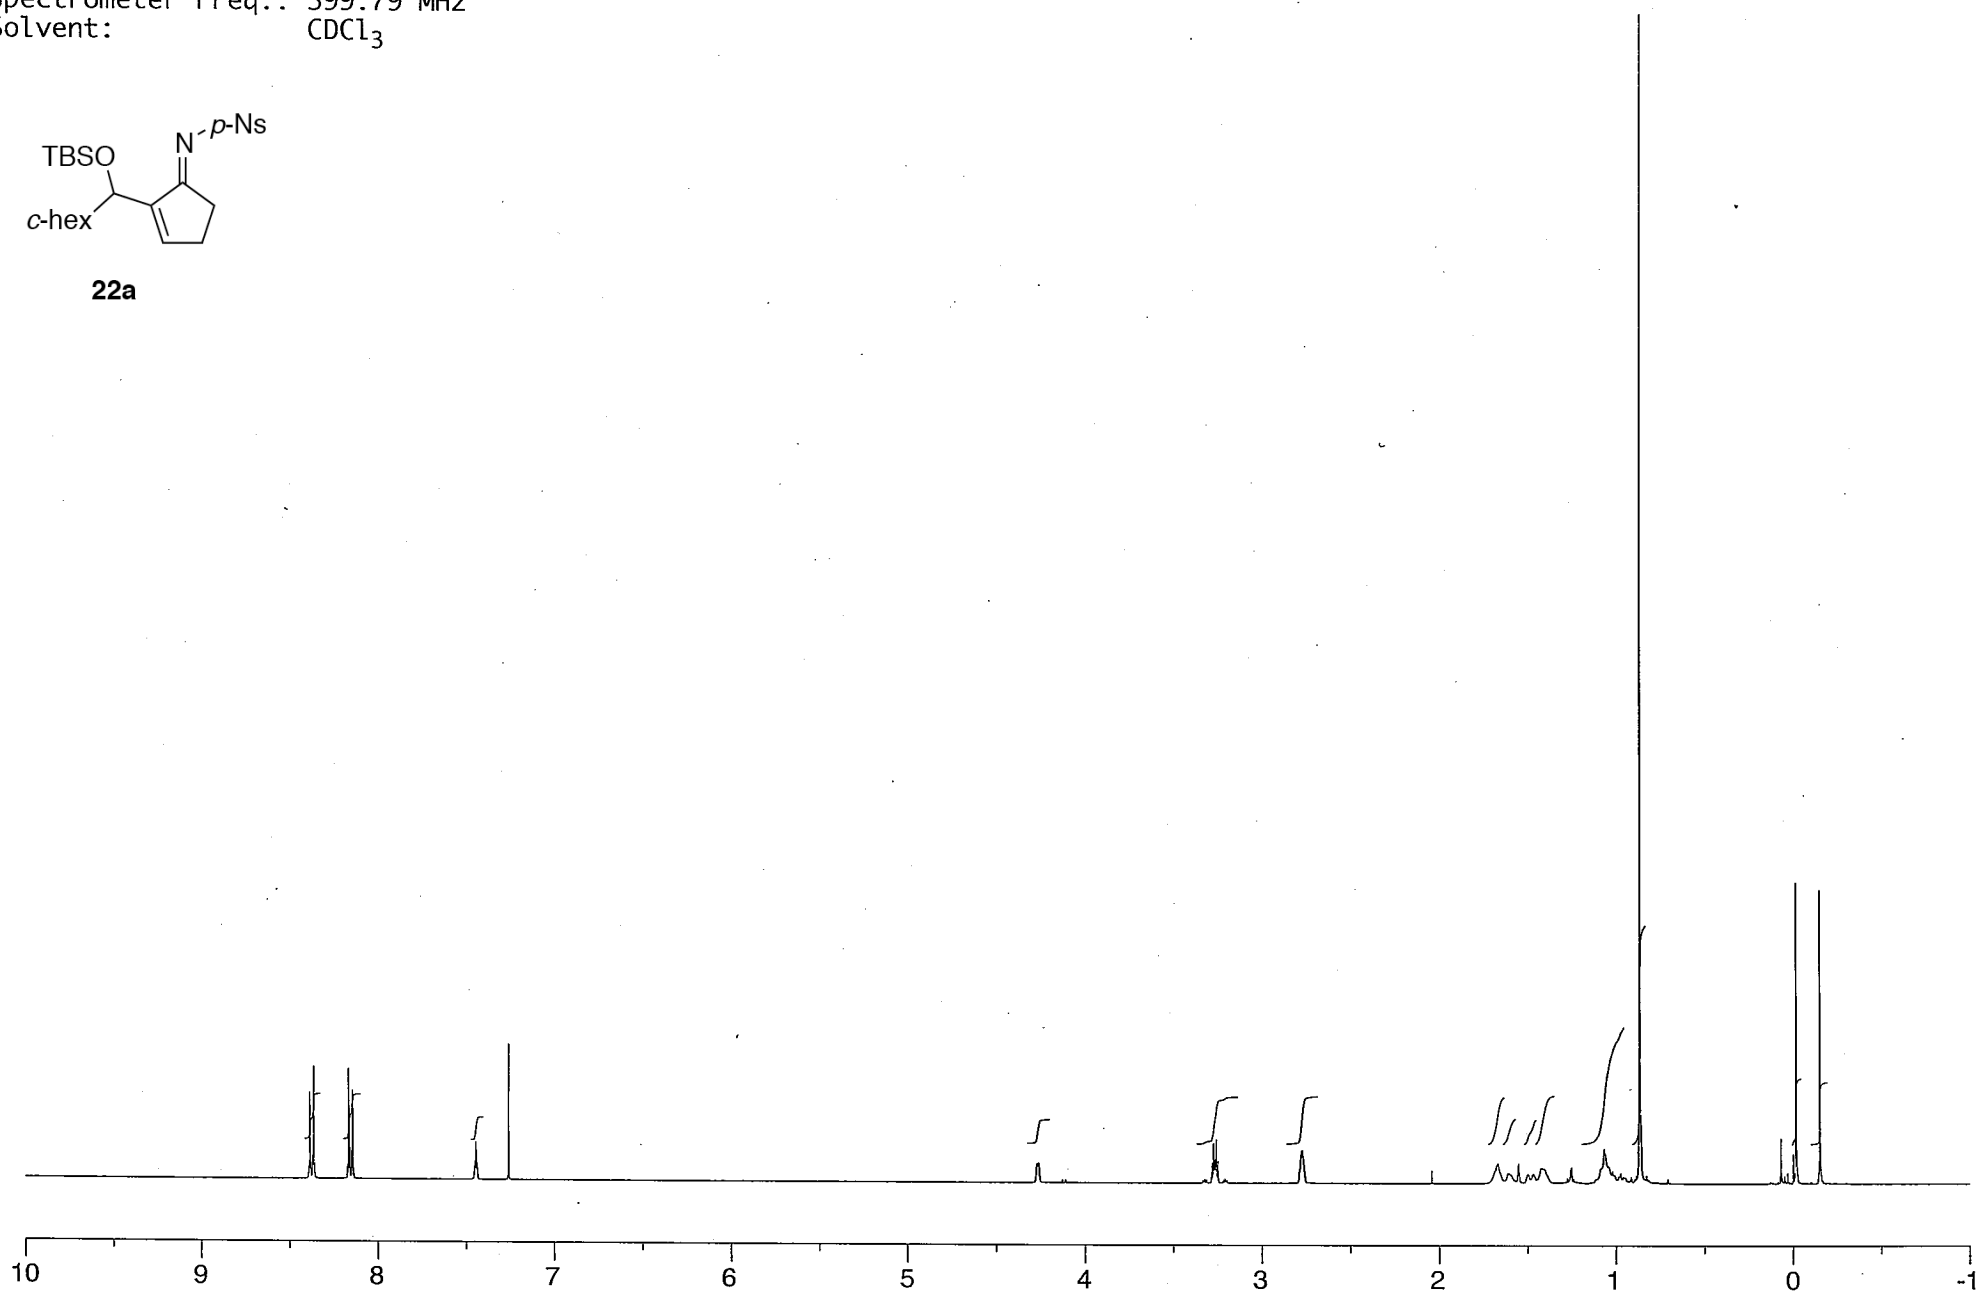

gwm-l-68\_28Jul2011

Pulse Sequence: s2pul  
Spectrometer Freq.: 100.54 MHz  
Solvent: CDCl<sub>3</sub>

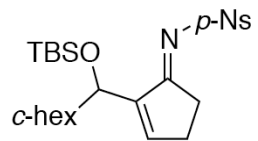

22a

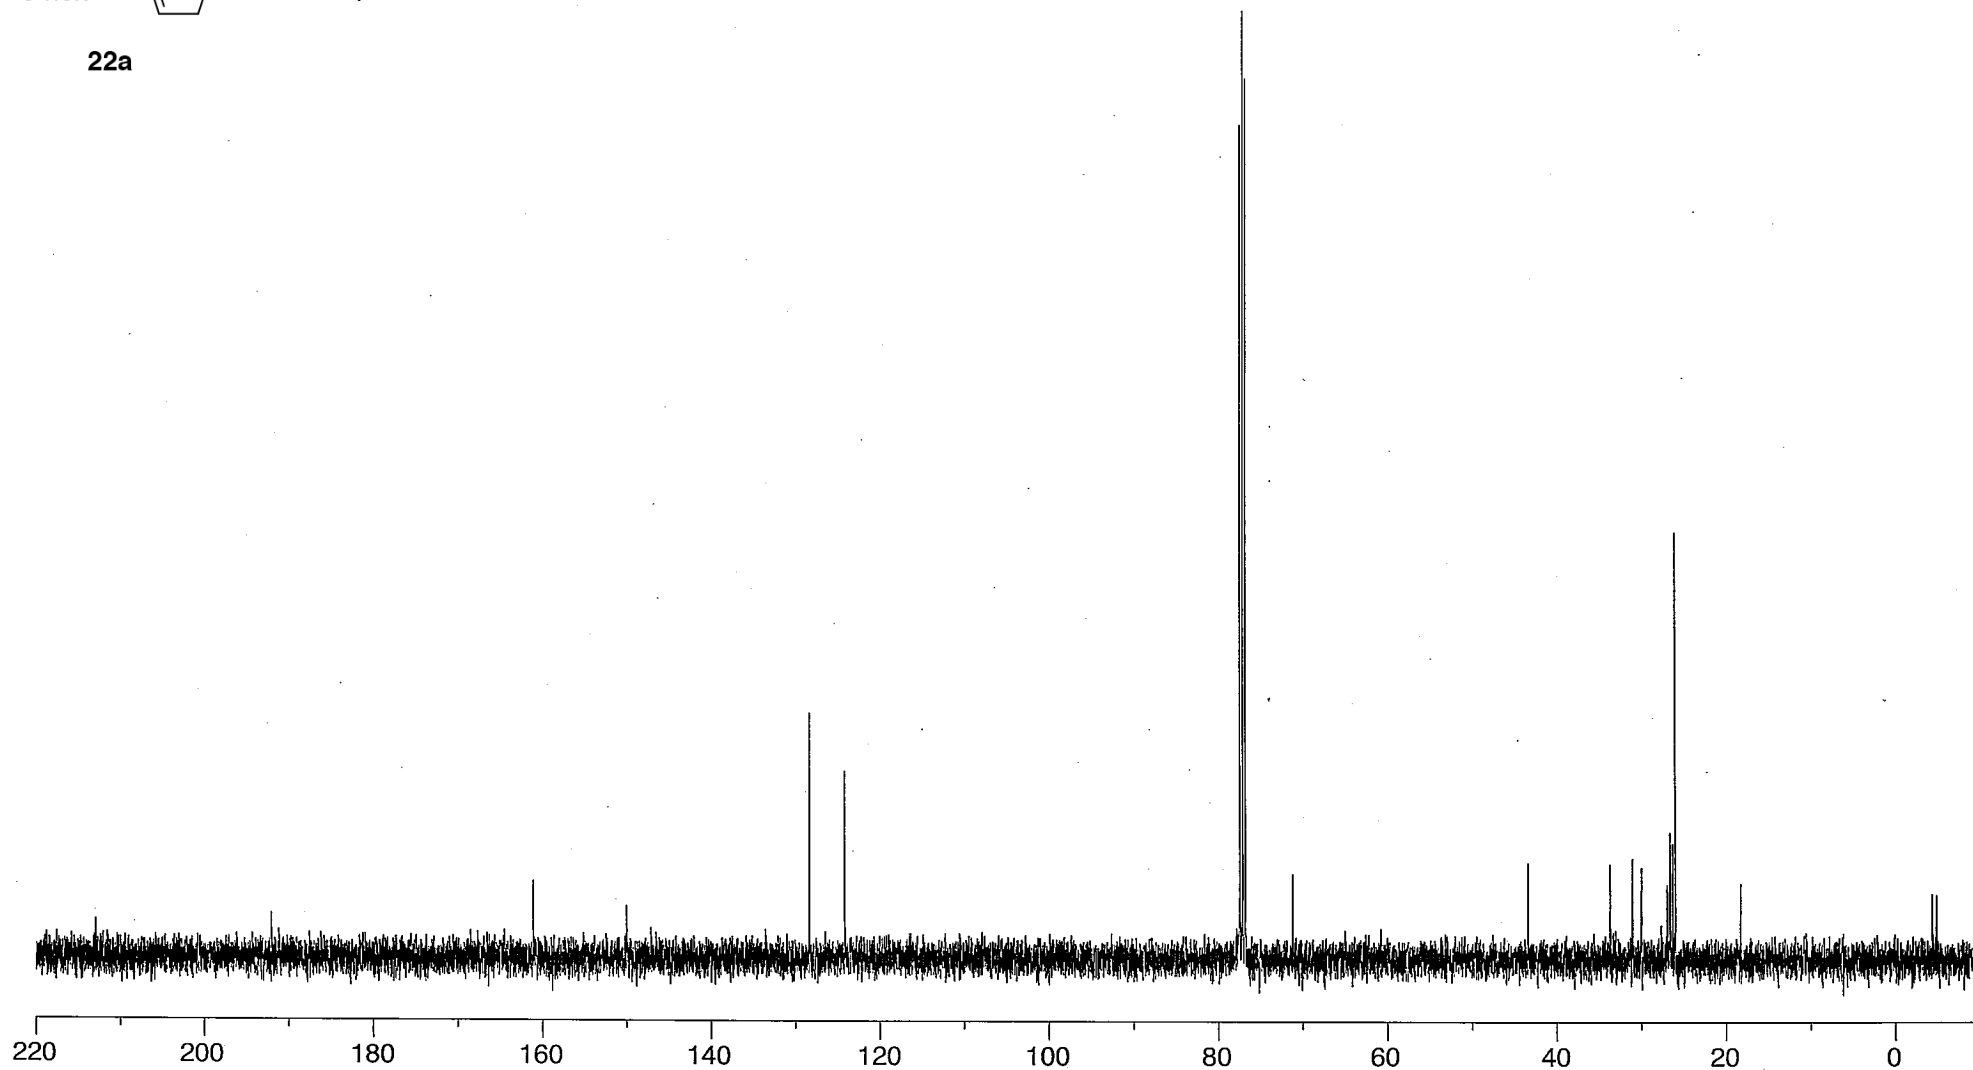

Pulse Sequence: s2pul  
Spectrometer Freq.: 399.79 MHz  
Solvent: CDCl<sub>3</sub>

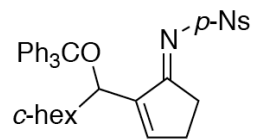

22b

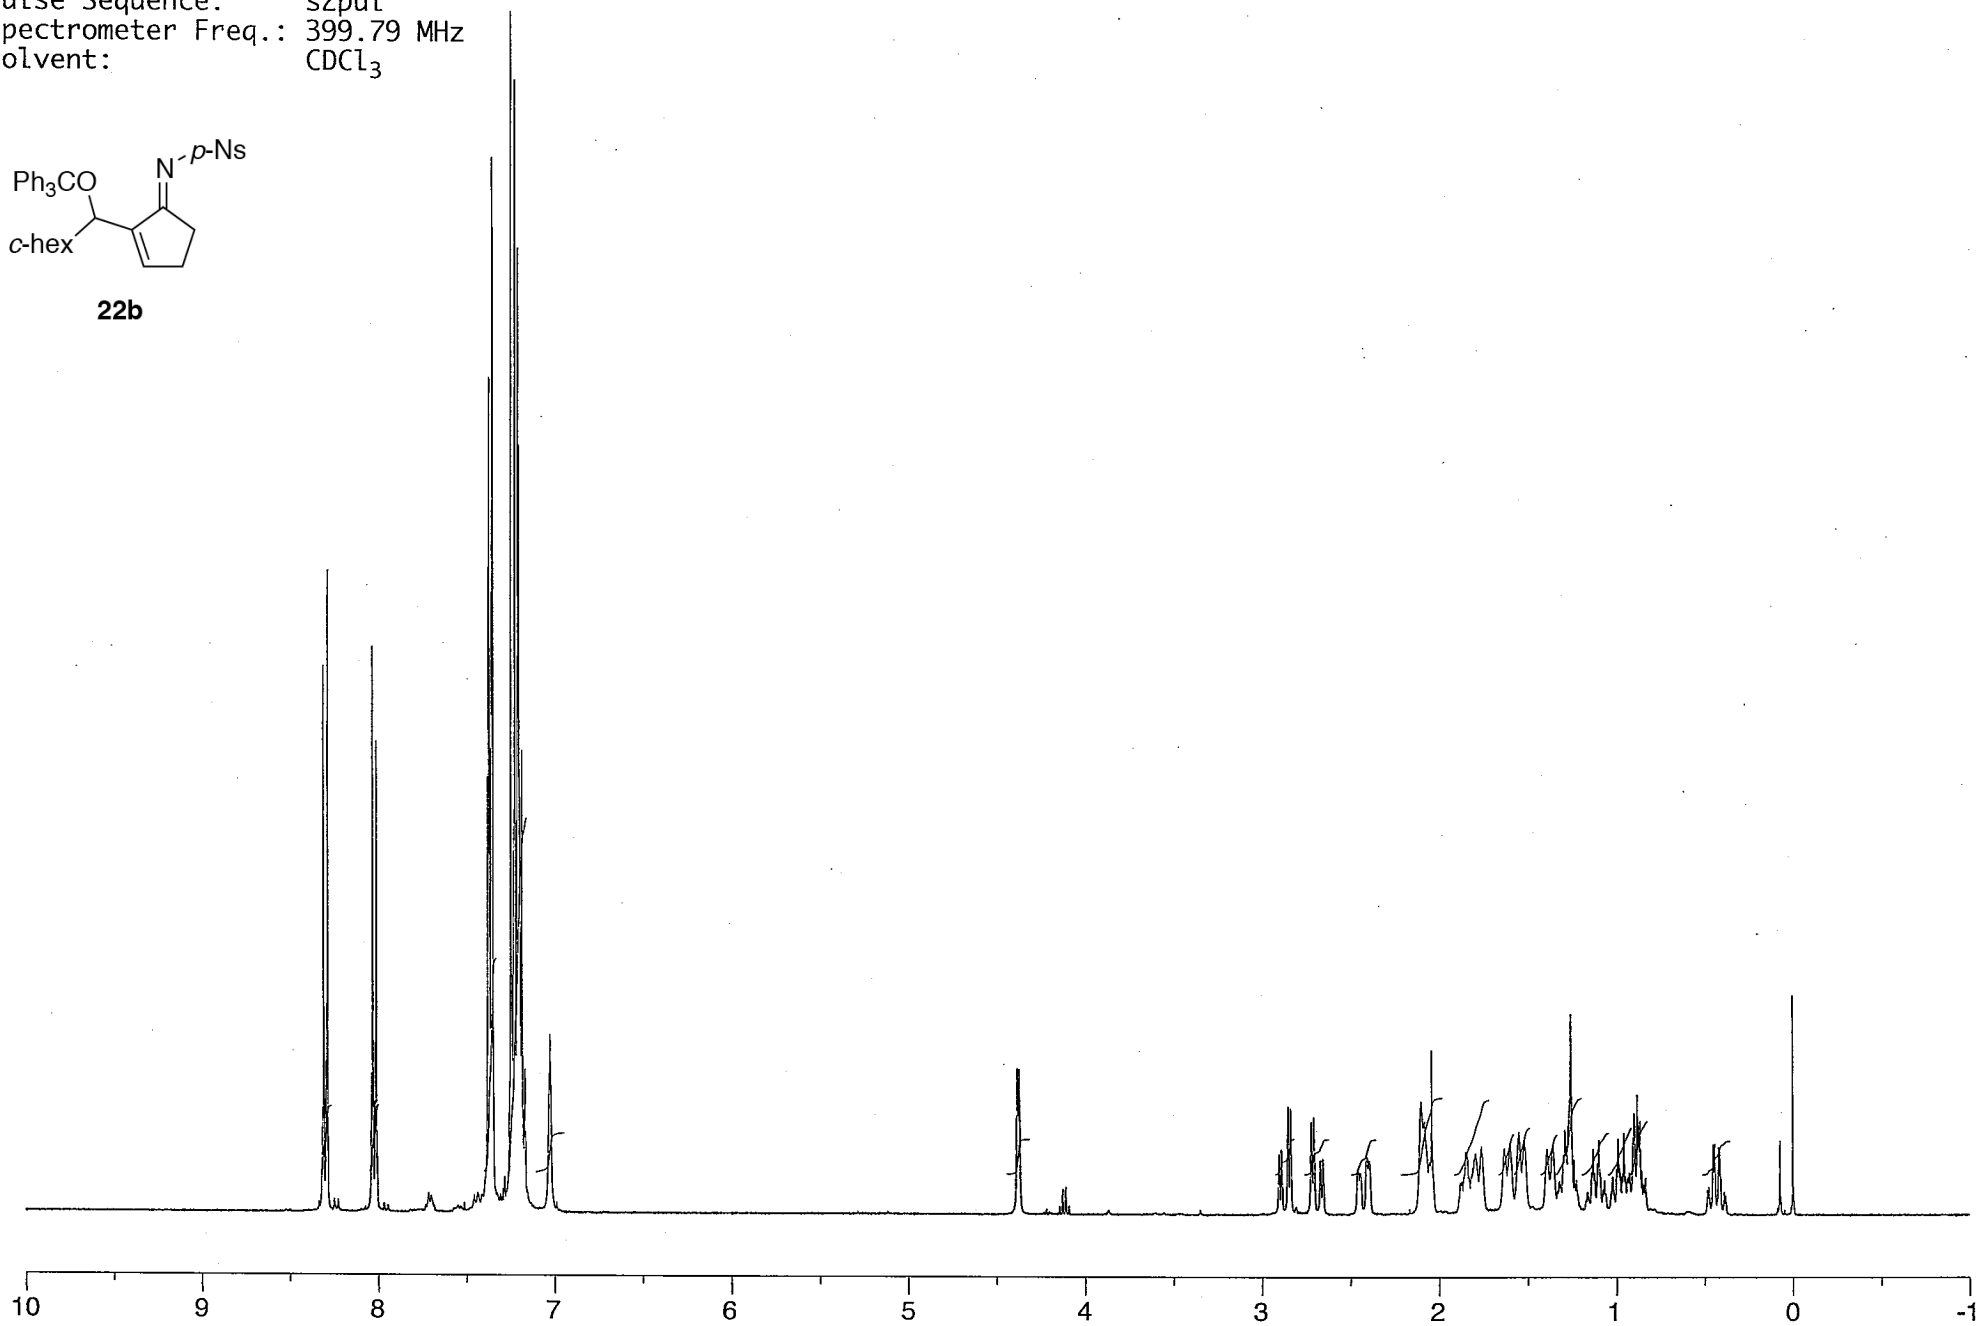

KAD-03-199\_11Oct2011

Pulse Sequence: s2pul

Spectrometer Freq.: 100.54 MHz

Solvent: CDCl<sub>3</sub>

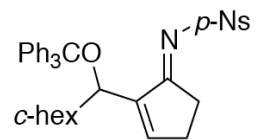

22b

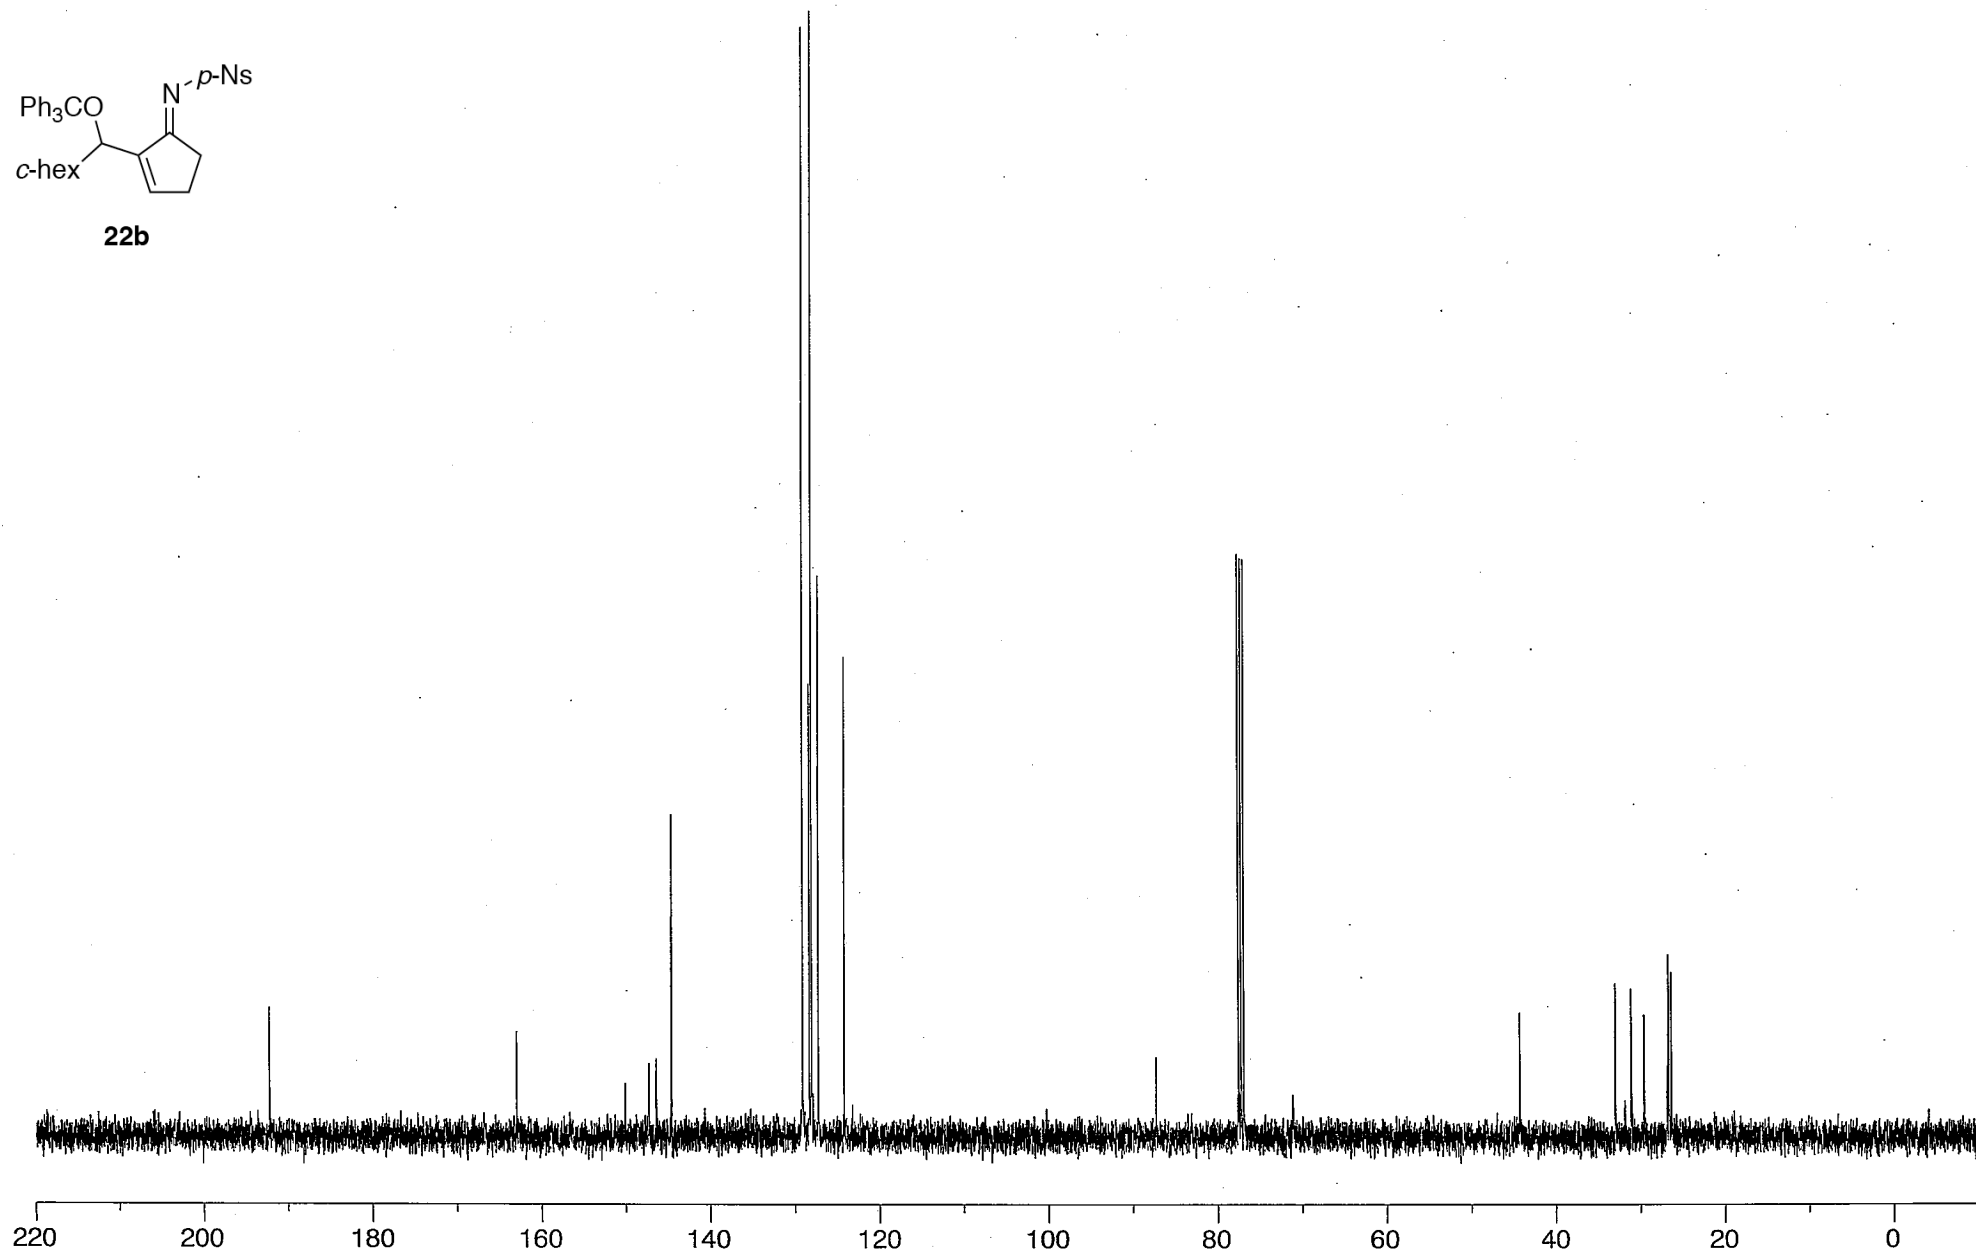

KAD-03-136\_19Sep2011

Pulse Sequence: s2pu1  
Spectrometer Freq.: 399.79 MHz  
Solvent: CDCl<sub>3</sub>

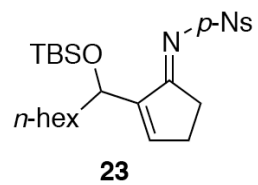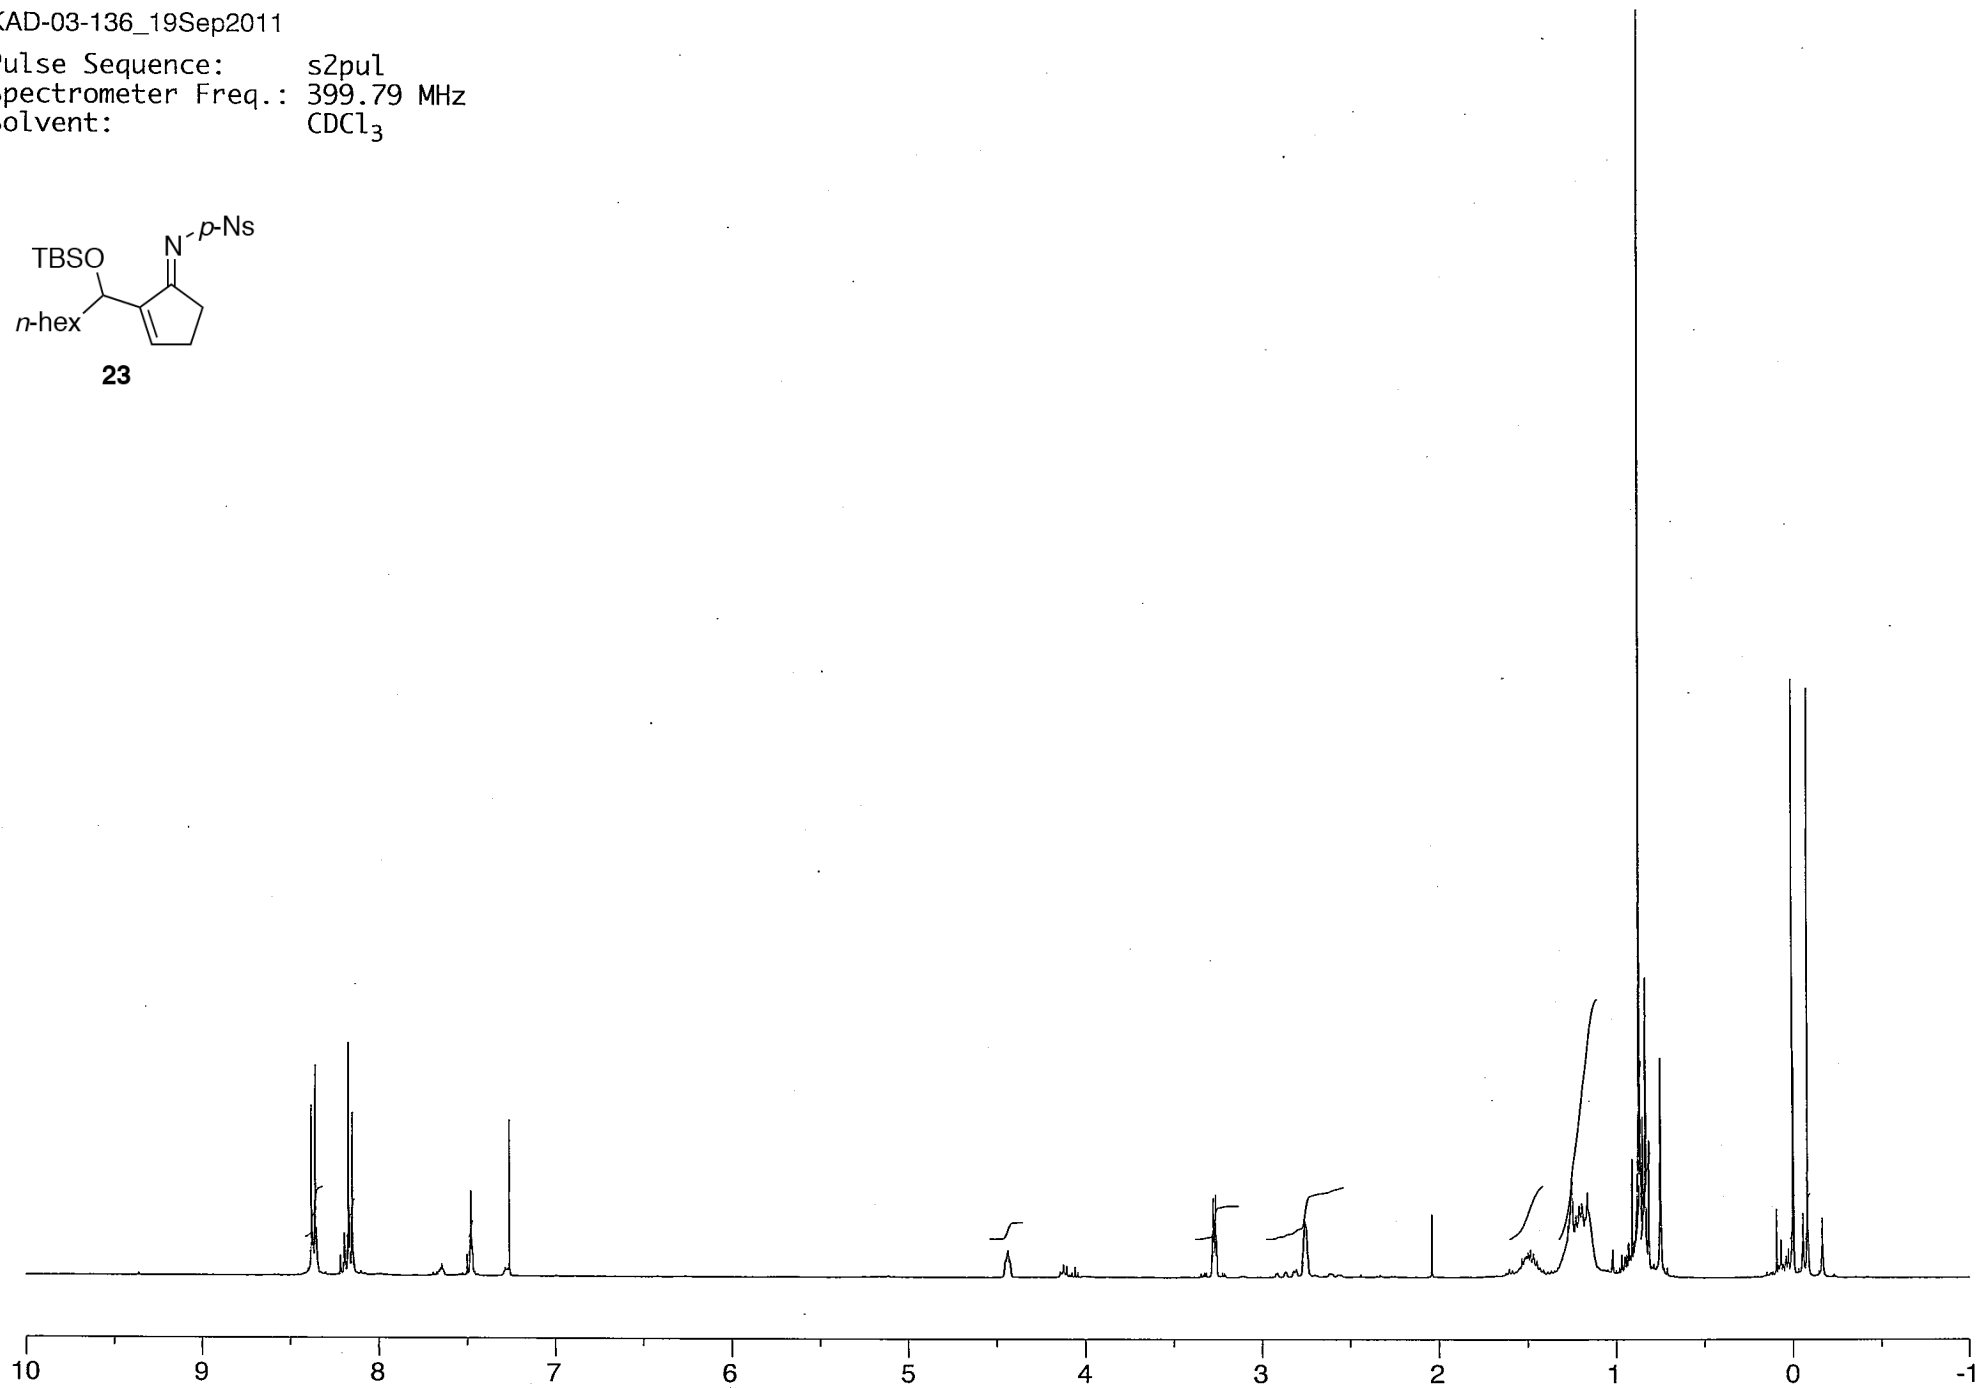



Pulse Sequence: s2pu1  
Spectrometer Freq.: 100.54 MHz  
Solvent: CDCl<sub>3</sub>

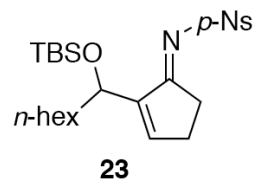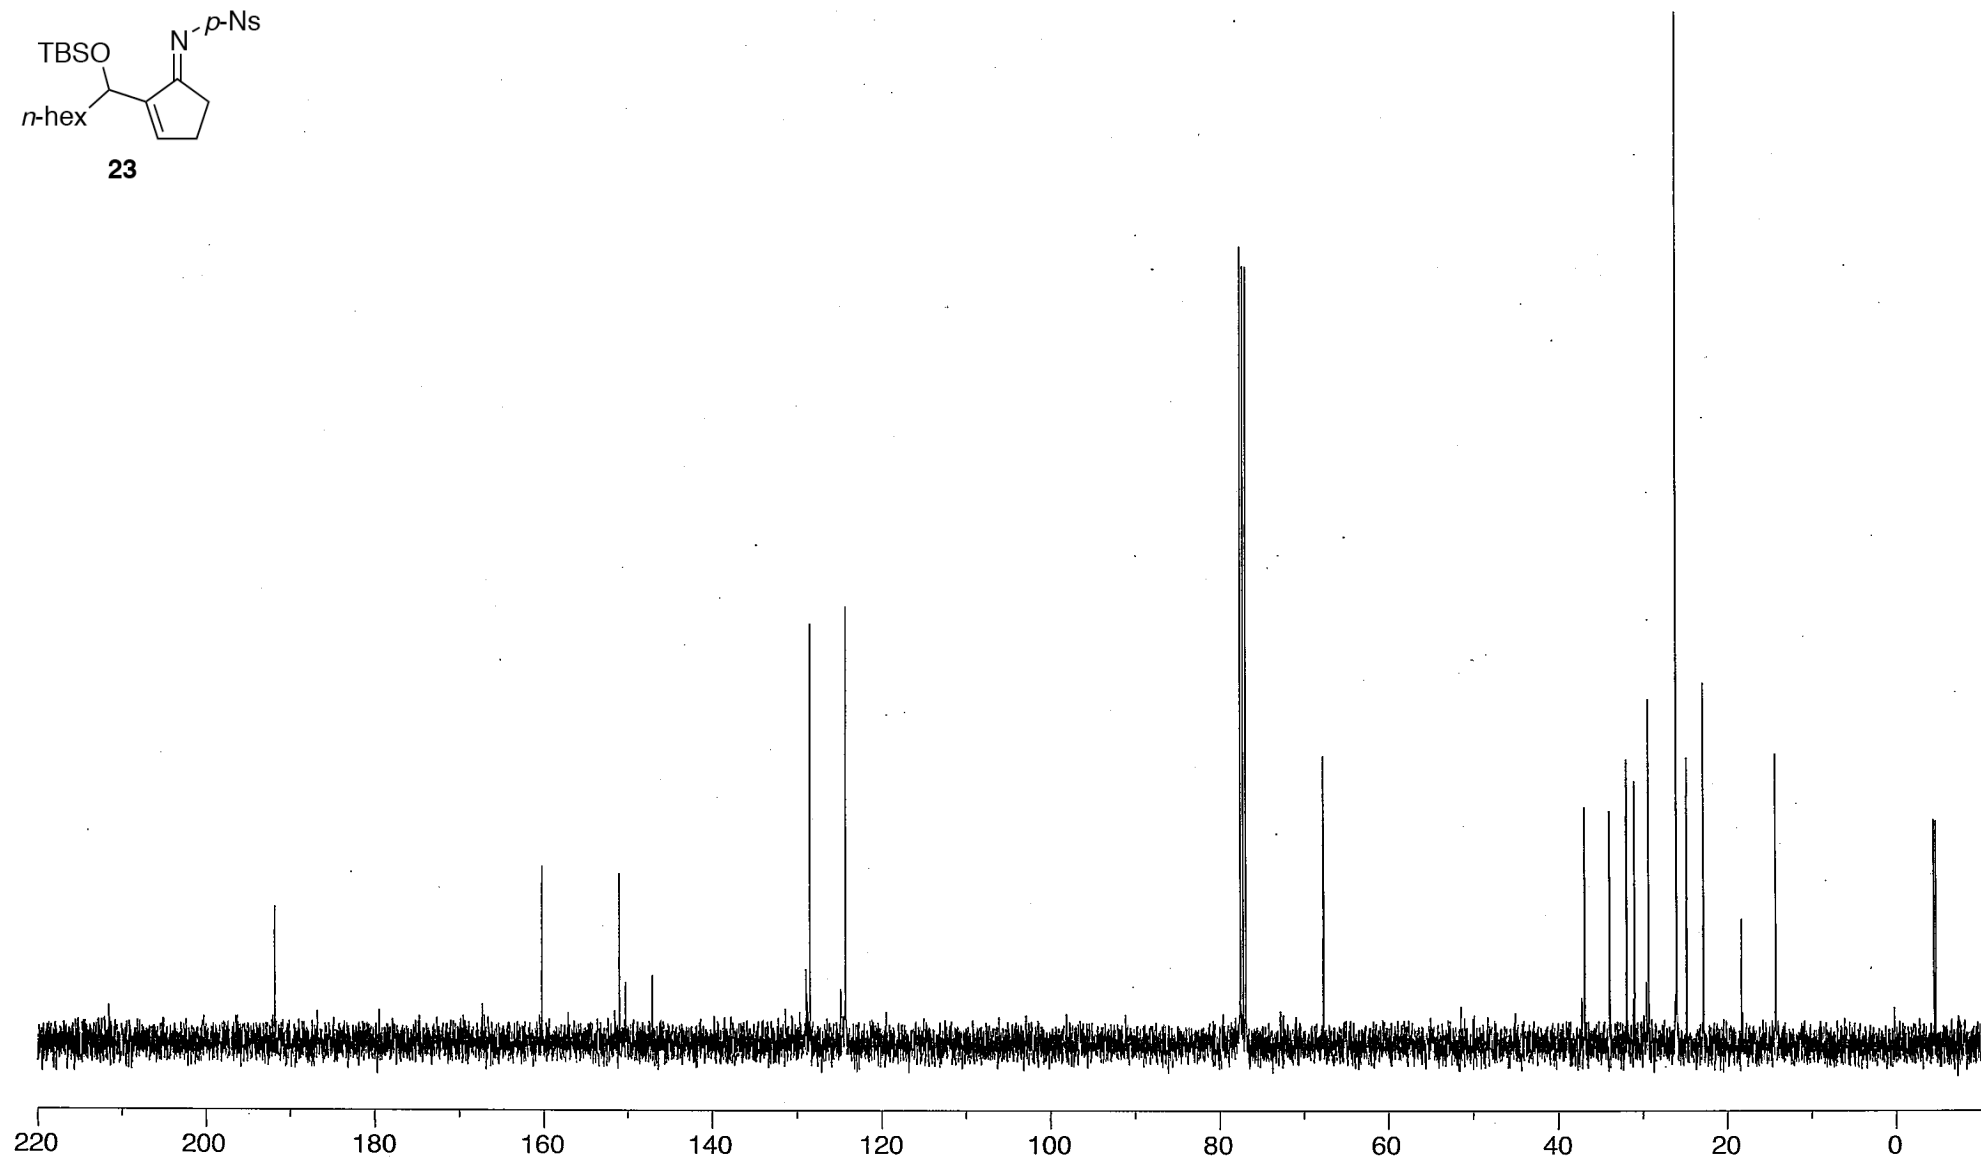

wxn28-1\_13Oct2011

Archive directory: /export/home/xiaona/vnmrsys/data  
Sample directory: wxn28-1\_13Oct2011

Pulse Sequence: s2pu1

Solvent: CDCl3  
Temp. 25.0 C / 298.1 K  
File: PROTON  
INOVA-500 "nmr03"

Relax. delay 1.000 sec  
Pulse 45.0 degrees  
Acq. time 3.754 sec  
Width 6387.7 Hz  
8 repetitions  
OBSERVE H1, 399.7865222 MHz  
DATA PROCESSING  
FT size 65536  
Total time 0 min, 57 sec

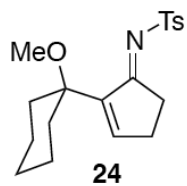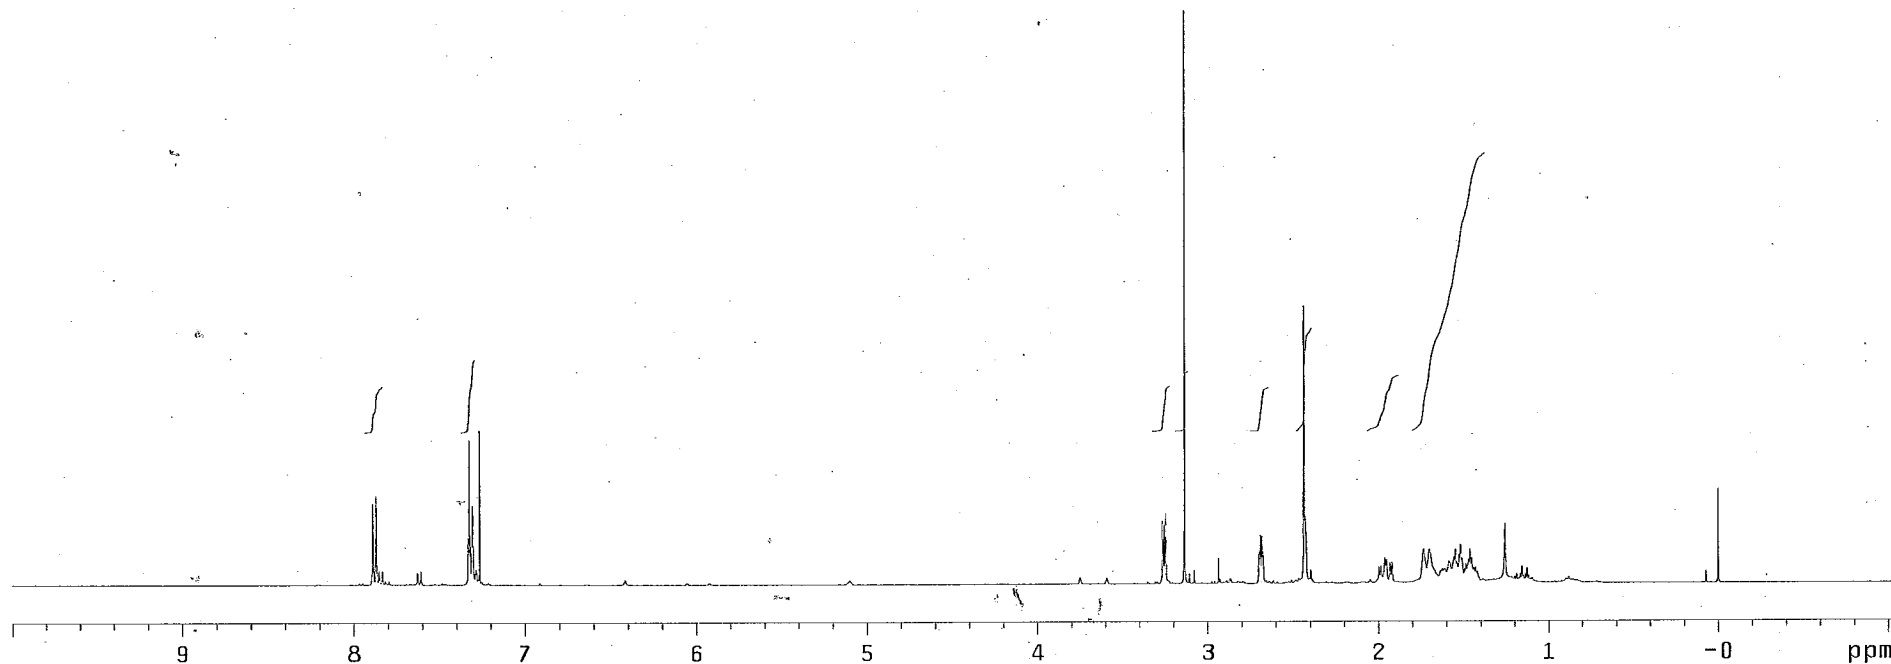

wxn25-28-1\_03Nov2011-22:16:52

Archive directory: /export/home/xiaona/vnmrSYS/data  
Sample directory: wxn25-28-1\_03Nov2011-22:16:52

Pulse Sequence: s2pu1

Solvent: CDCl3  
Temp. 25.0 C / 298.1 K  
File: CARBON  
INOVA-500 "nmr03"

Relax. delay 1.000 sec  
Pulse 45.0 degrees  
Acq. time 1.197 sec  
Width 25157.2 Hz  
5000 repetitions  
OBSERVE C13, 100.5264022 MHz  
DECOUPLE H1, 399.7885243 MHz  
Power 41 dB  
continuously on  
WALTZ-16 modulated  
DATA PROCESSING  
Line broadening 0.8 Hz  
FT size 65536  
Total time 3 hr, 3 min, 49 sec

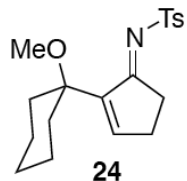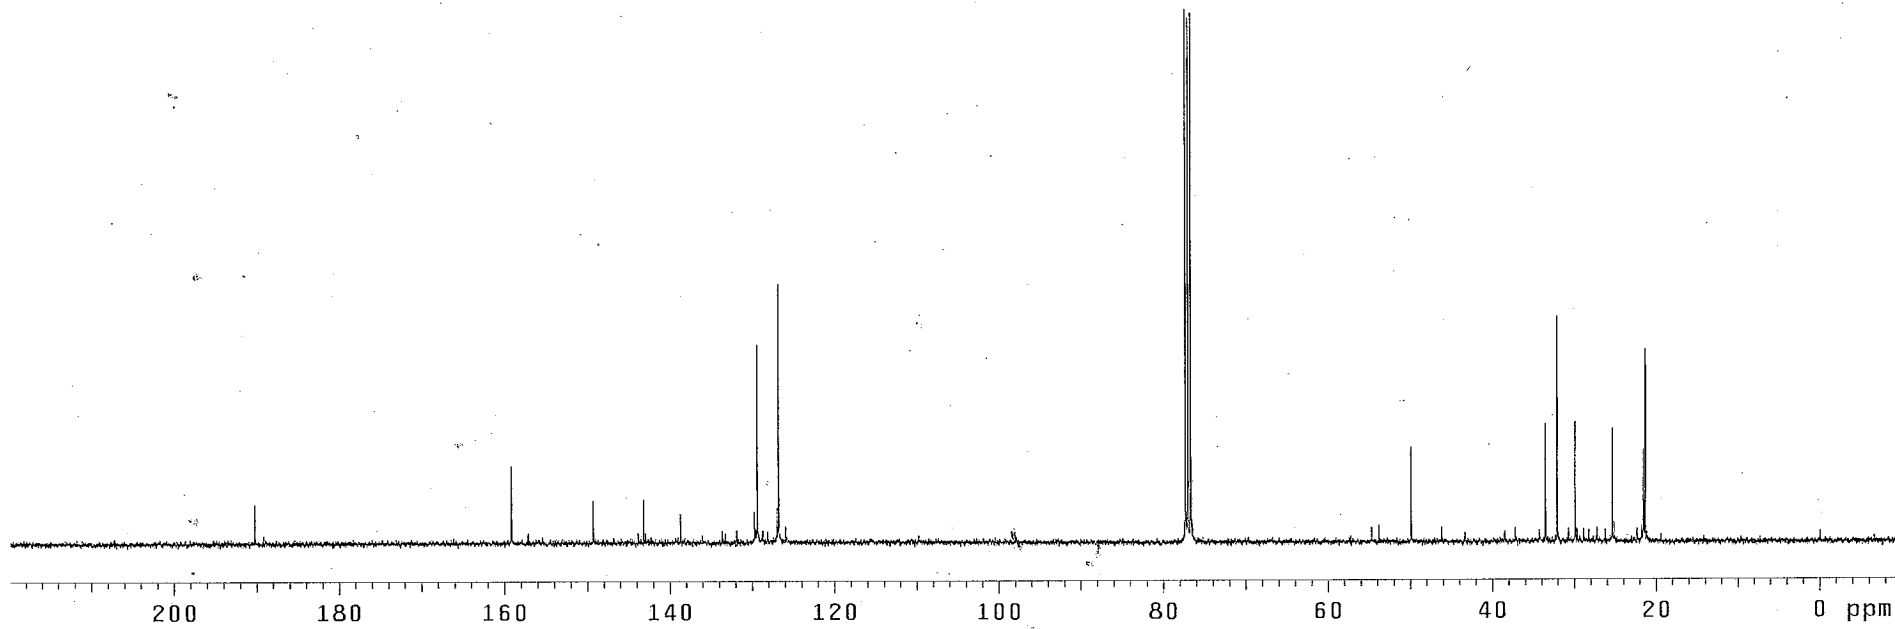

KAD-03-086\_23Apr2012

Pulse Sequence: s2pu1  
Spectrometer Freq.: 499.73 MHz  
Solvent: CDCl<sub>3</sub>

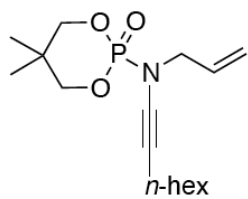

**30b**

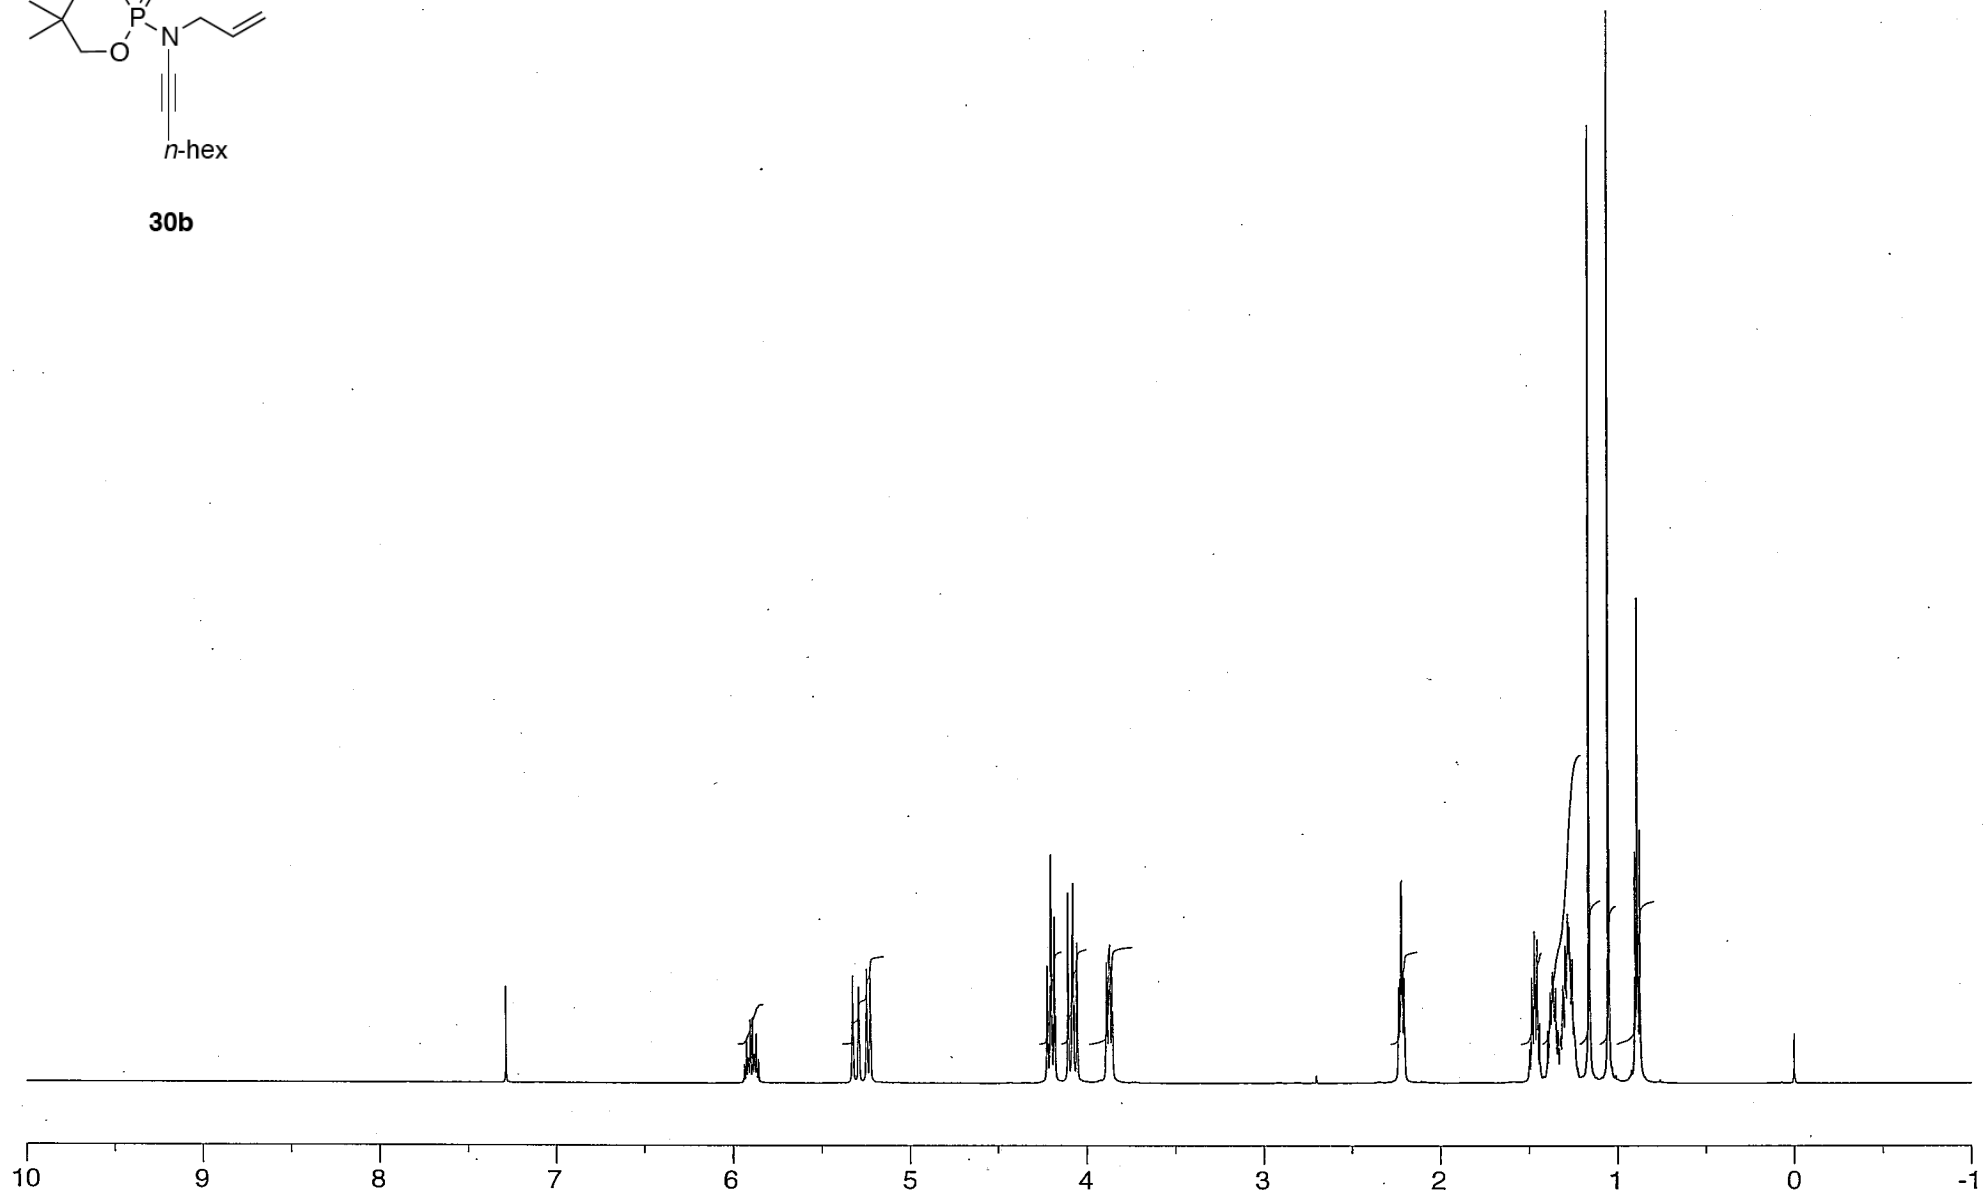

KAD-03-086\_23Apr2012

Pulse Sequence: s2pul  
Spectrometer Freq.: 125.67 MHz  
Solvent: CDCl<sub>3</sub>

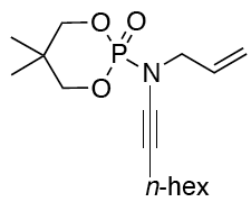

**30b**

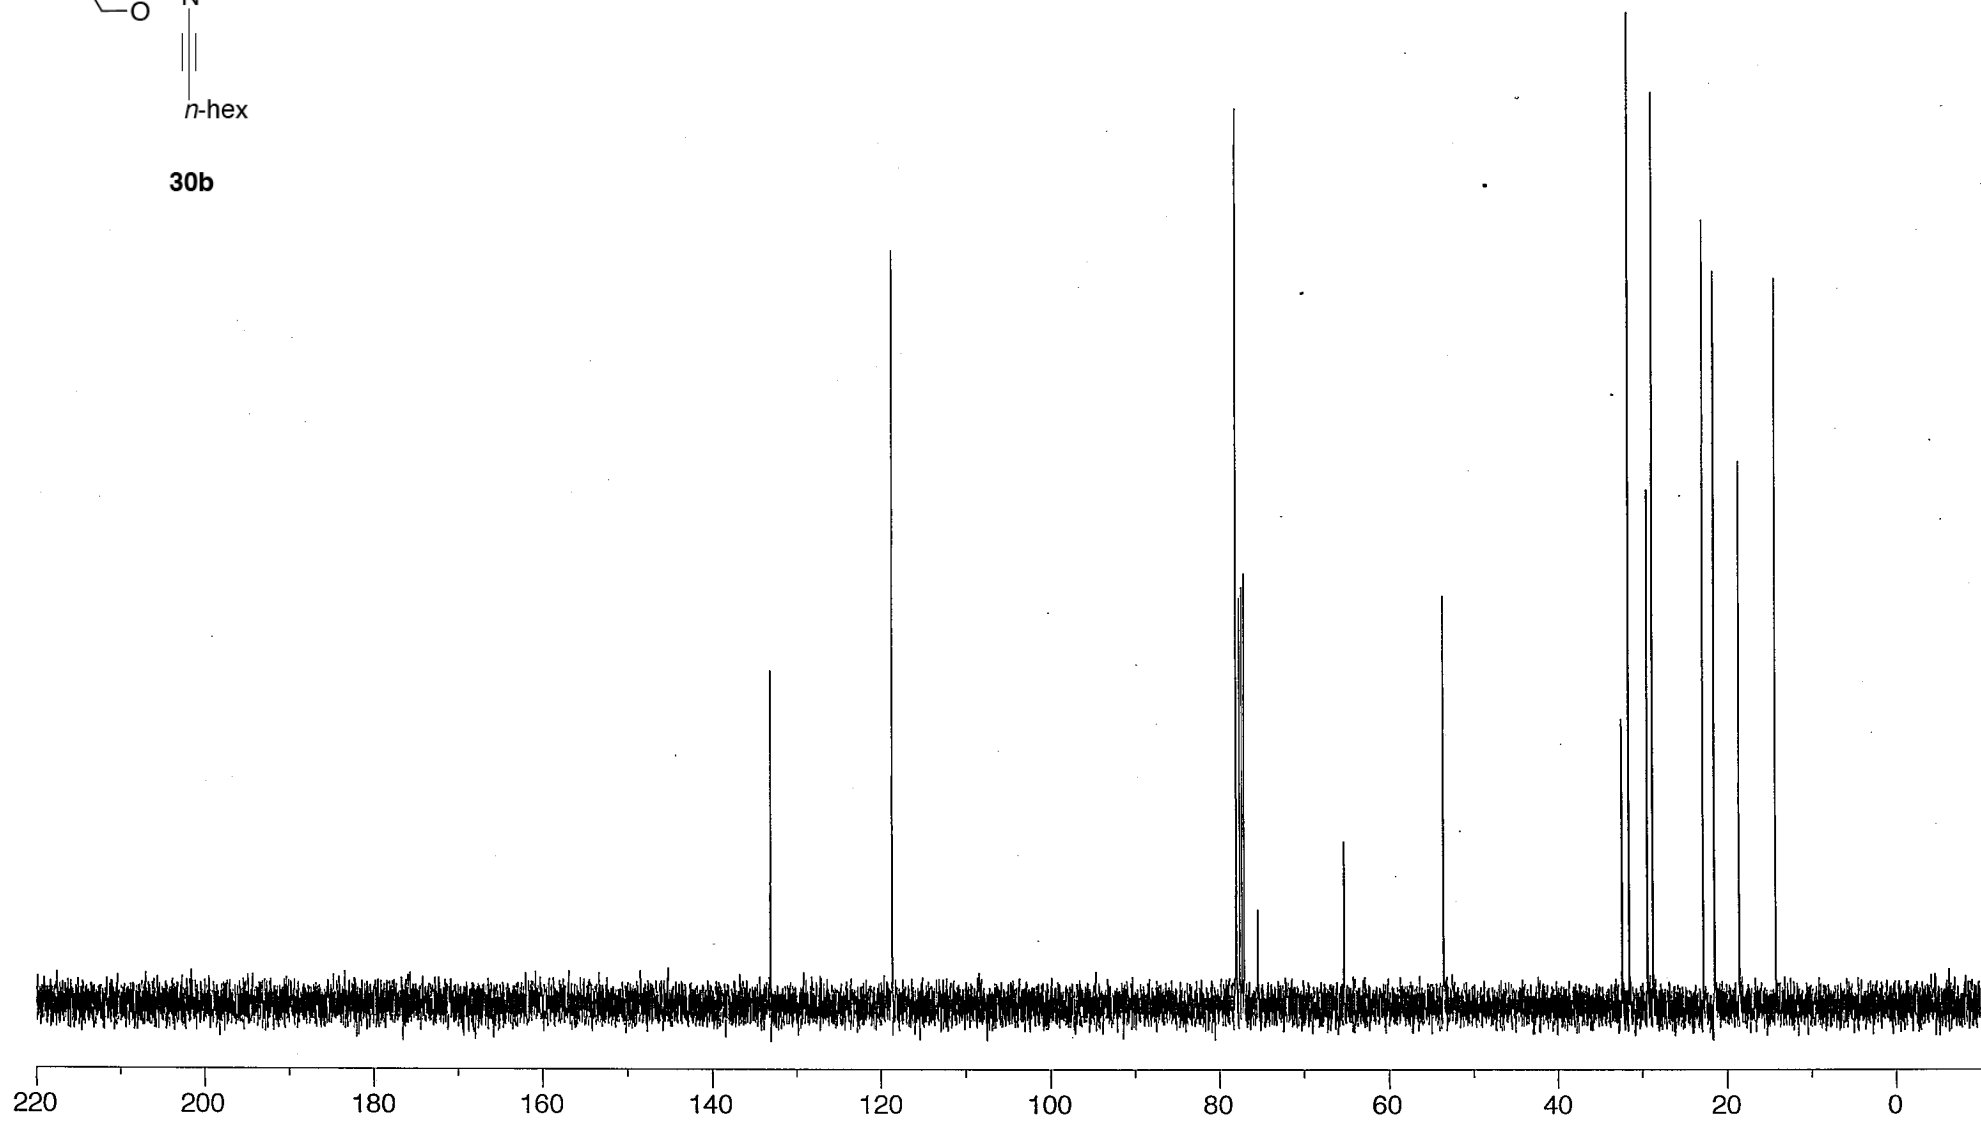

KAD-03-086\_23May2011

Pulse Sequence: s2pul  
Spectrometer Freq.: 161.85 MHz  
Solvent: CDCl<sub>3</sub>

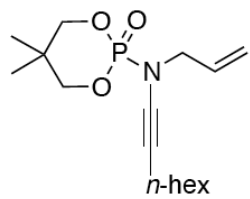

**30b**

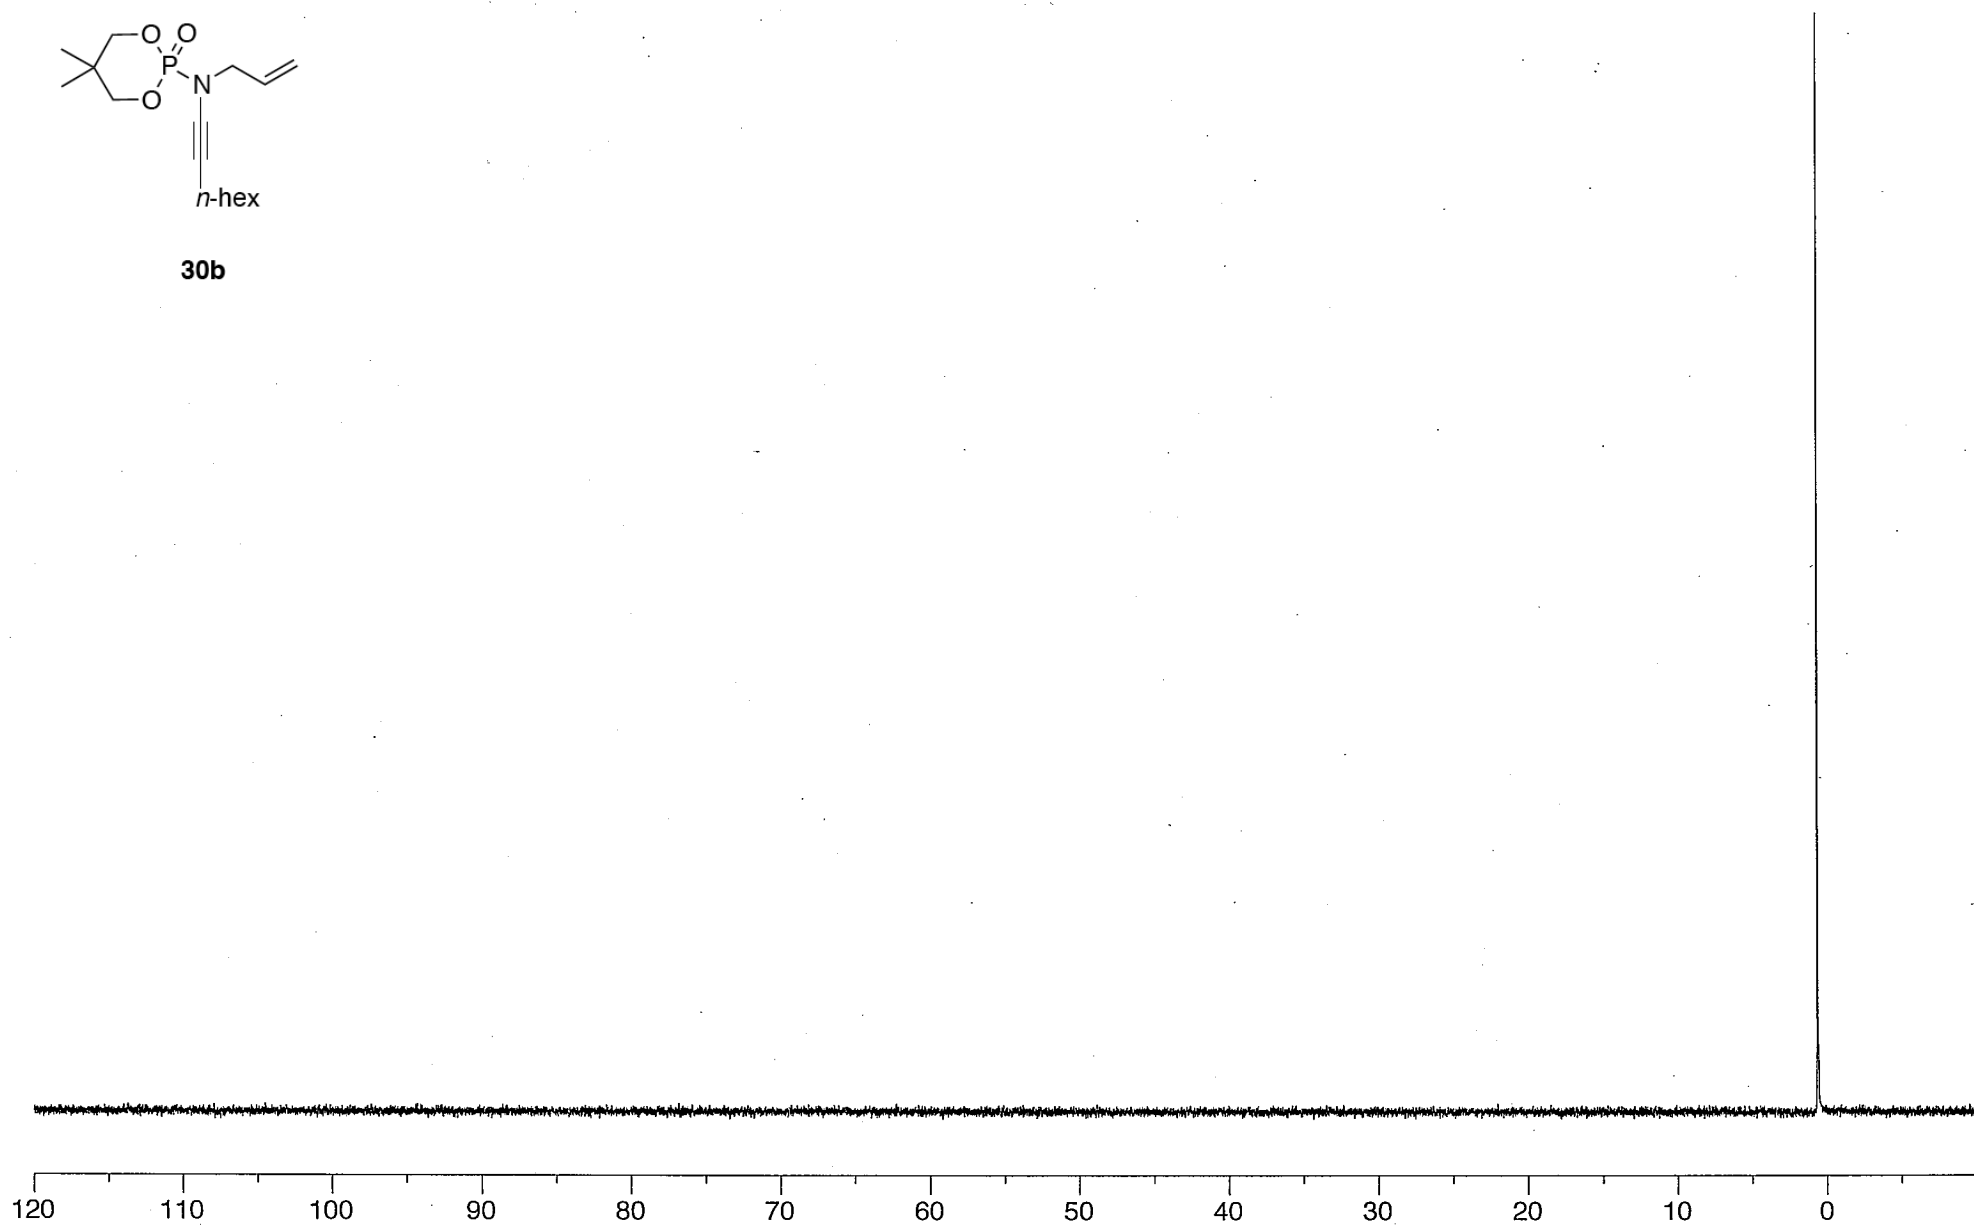

wxn50-2\_04Nov2011

Archive directory: /export/home/xiaona/vnmrsys/data  
Sample directory: wxn50-2\_04Nov2011

Pulse Sequence: s2pul

Solvent: CDCl3  
Temp: 25.0 C / 298.1 K  
File: PROTON  
INOVA-500 "nmr03"

Relax. delay 1.000 sec  
Pulse 45.0 degrees  
Acq. time 3.754 sec  
Width 6387.7 Hz  
8 repetitions  
OBSERVE H1, 399.7864939 MHz  
DATA PROCESSING  
FT size 65536  
Total time 0 min, 57 sec

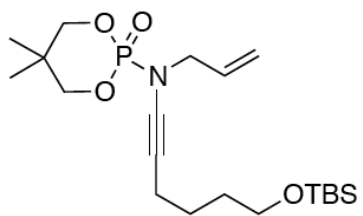

30c

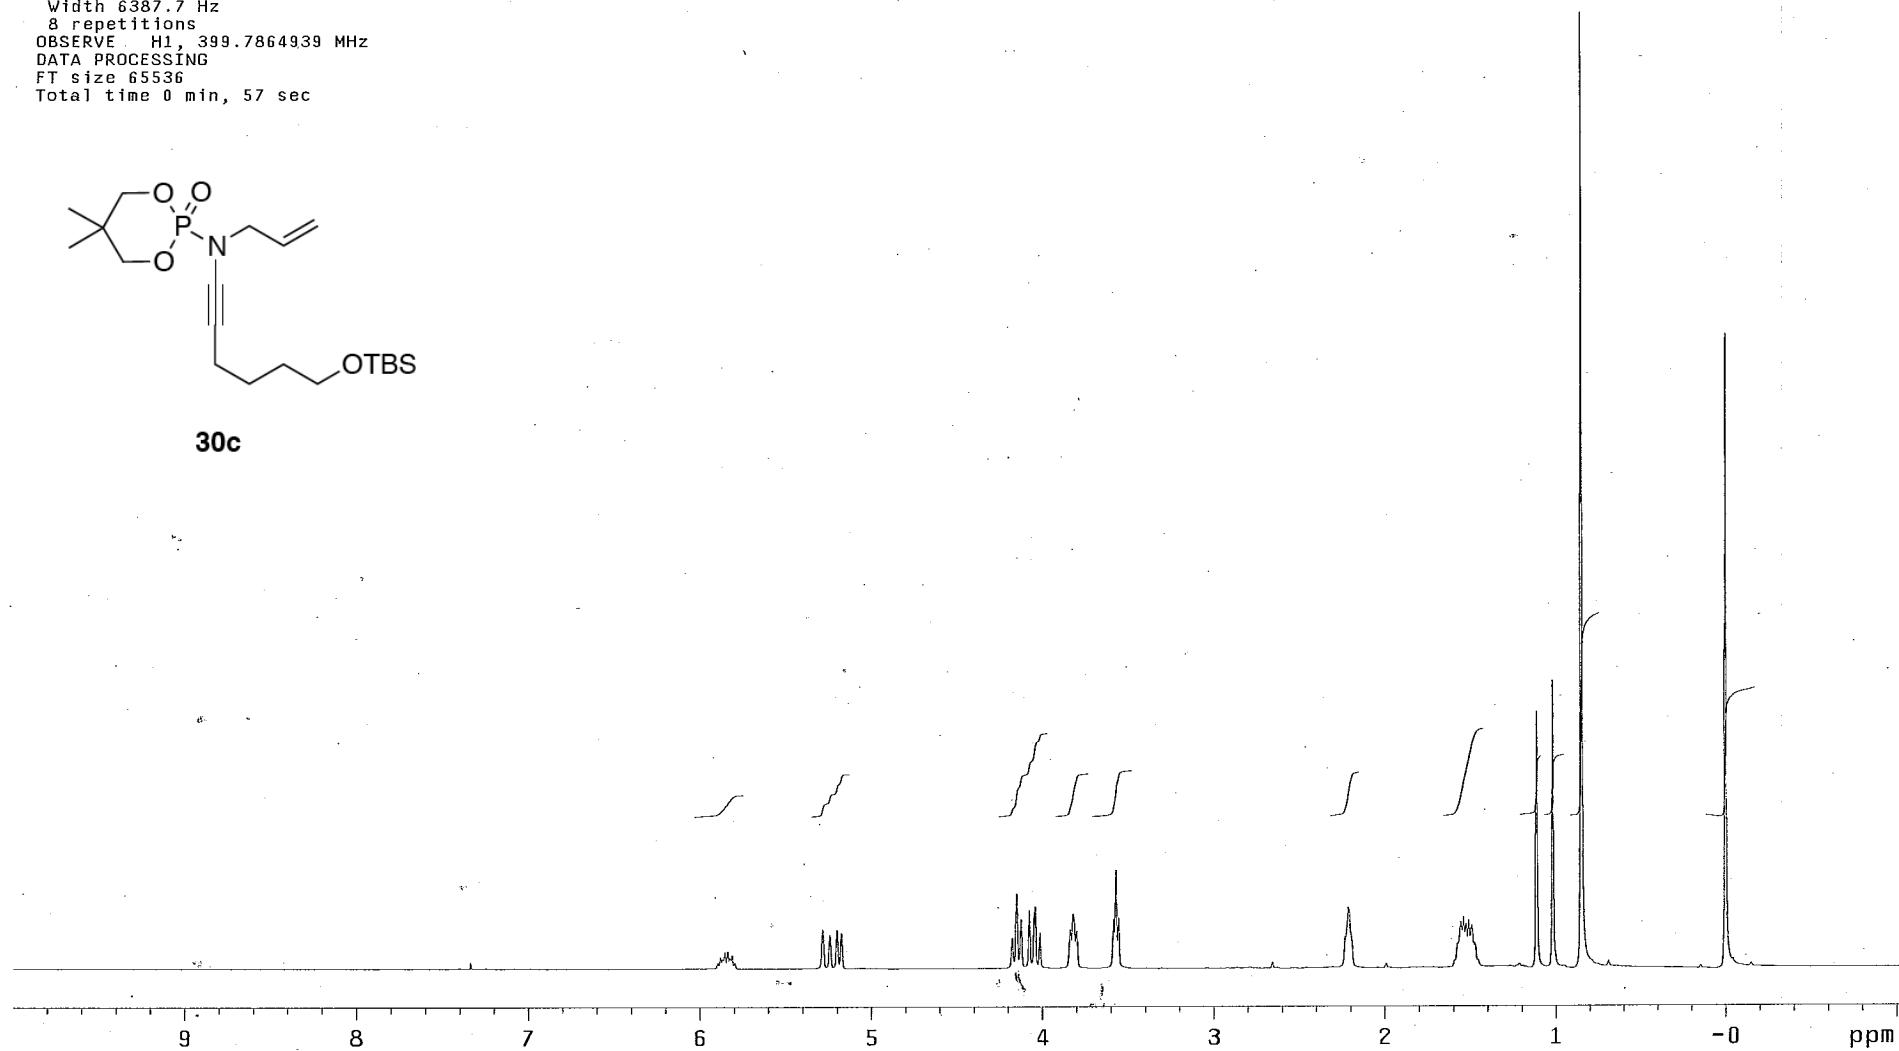

wxn50-2\_04Nov2011-12:46:23

Archive directory: /export/home/xiaona/vnmrsys/data  
Sample directory: wxn50-2\_04Nov2011-12:46:23

Pulse Sequence: s2pu1

Solvent: CDCl3  
Temp. 25.0 C / 298.1 K  
File: CARBON  
INOVA-500 "nmr03"

Relax. delay 1.000 sec  
Pulse 45.0 degrees  
Acq. time 1.197 sec  
Width 25157.2 Hz  
314 repetitions  
OBSERVE C13, 100.5264199 MHz  
DECOUPLE H1, 399.7885243 MHz  
Power 41 dB  
continuously on  
WALTZ-16 modulated  
DATA PROCESSING  
Line broadening 0.8 Hz  
FT size 65536  
Total time 18 min, 49 sec

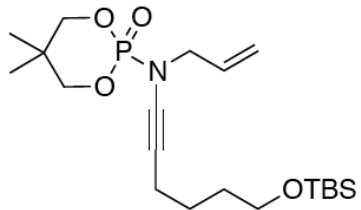

30c

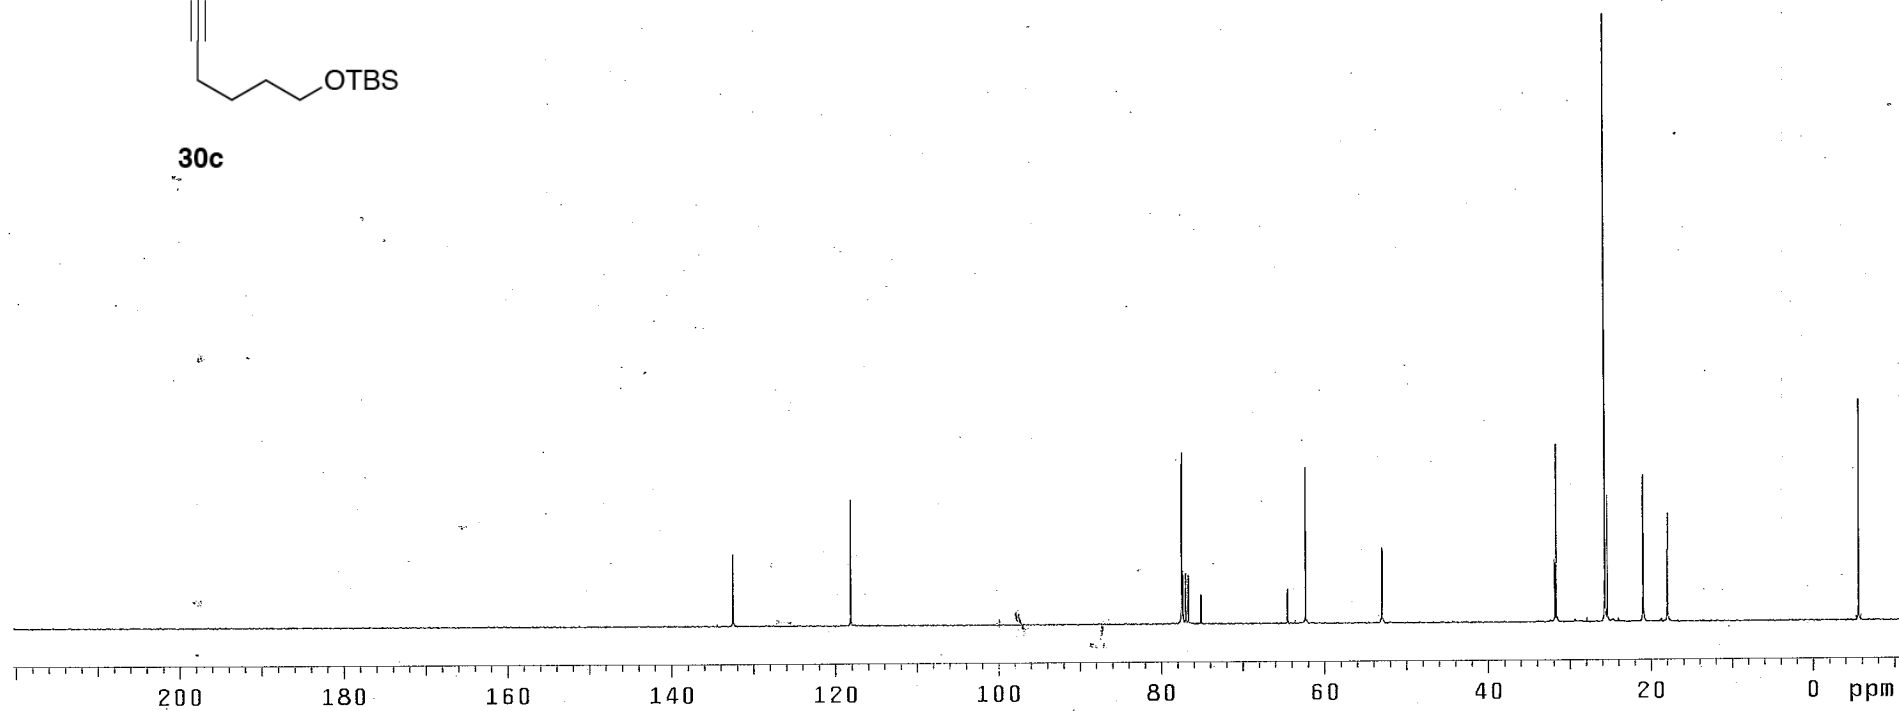



wxn50-2\_04Nov2011

Archive directory: /export/home/xiaona/vnmrsys/data  
Sample directory: wxn50-2\_04Nov2011

Pulse Sequence: s2pu1

Solvent: CDCl3  
Temp. 25.0 C / 298.1 K  
File: PHOSPHORUS  
INOVA-500 "nmr03"

Relax. delay 1.000 sec  
Pulse 35.0 degrees  
Acq. time 0.799 sec  
Width 35650.6 Hz  
64 repetitions  
OBSERVE P31, 161.8363711 MHz  
DECOUPLE H1, 399.7885243 MHz  
Power 41 dB  
on during acquisition  
off during delay  
WALTZ-16 modulated  
DATA PROCESSING  
Line broadening 1.0 Hz  
FT size 65536  
Total time 2 min, 2 sec

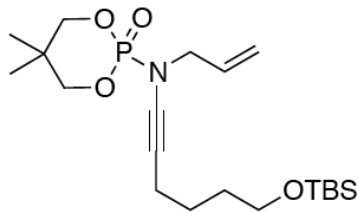

30c

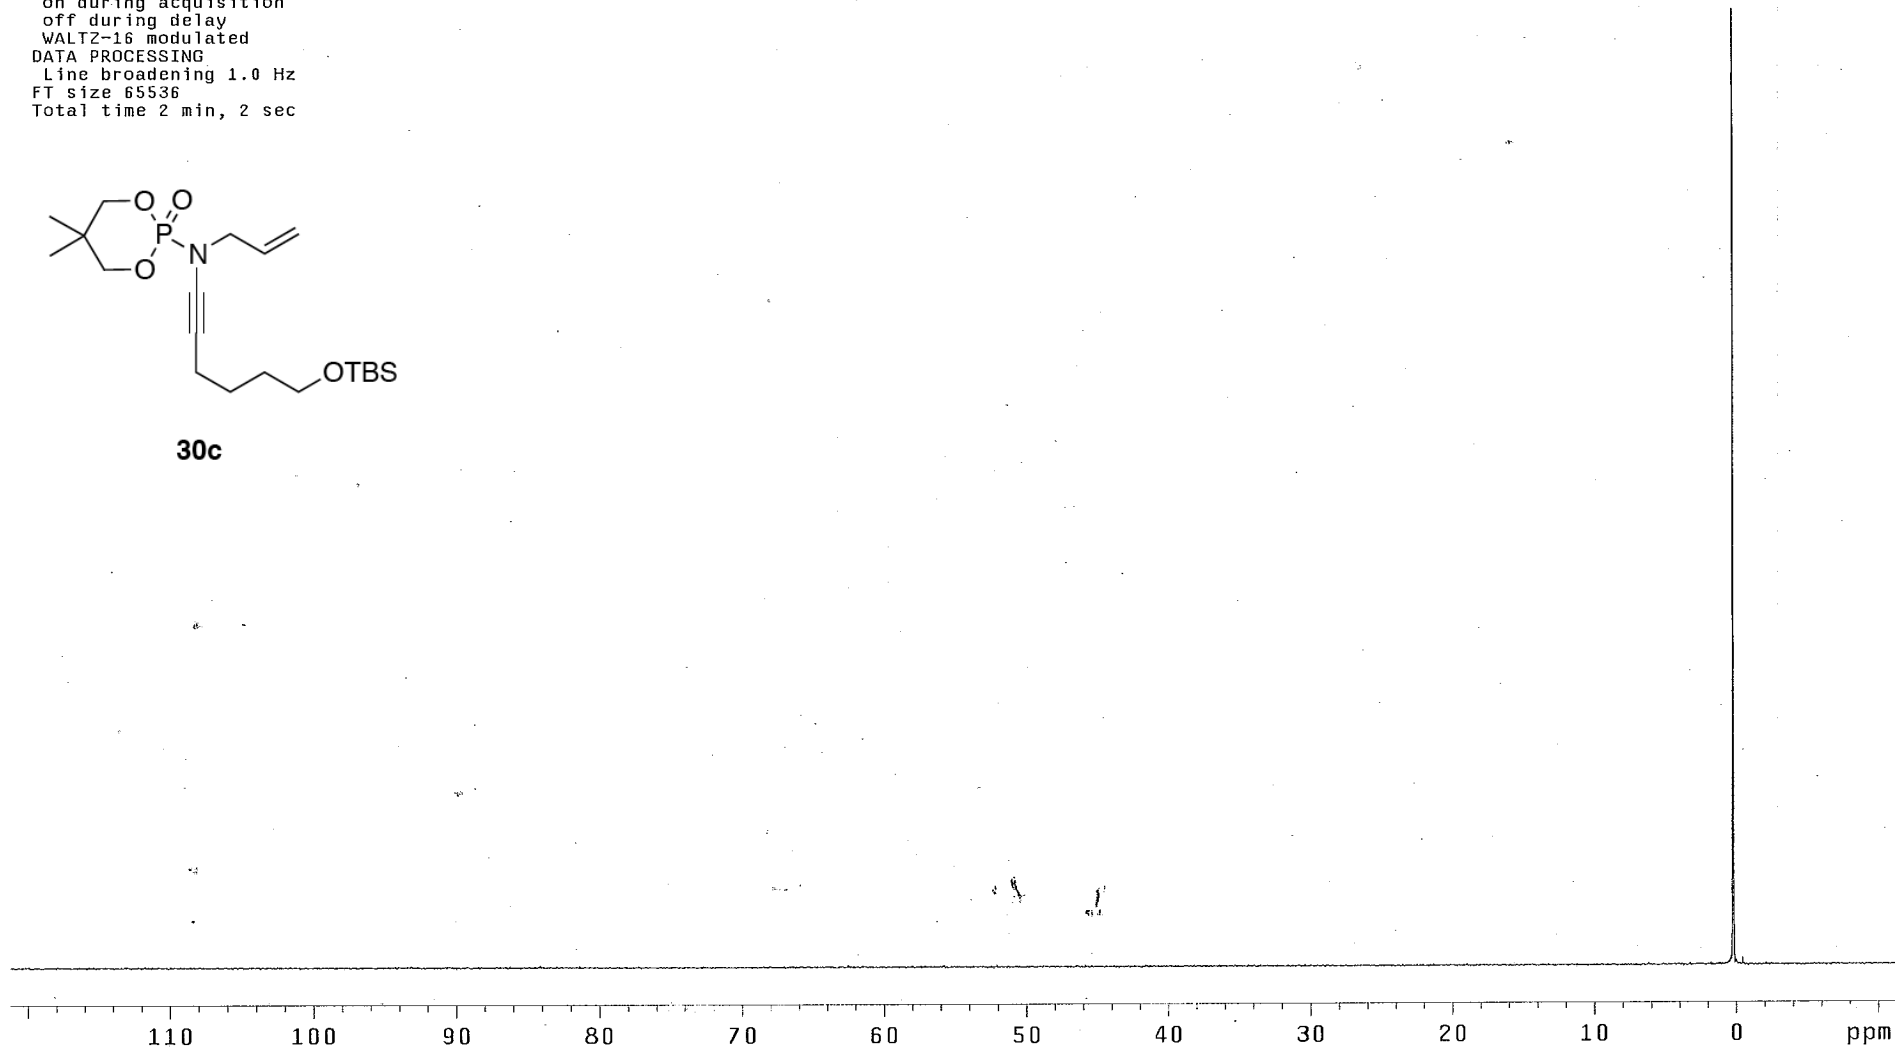

KAD-03-096\_26May2011

Pulse Sequence: s2pul  
Spectrometer Freq.: 399.79 MHz  
Solvent: CDCl<sub>3</sub>

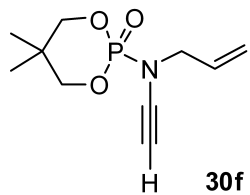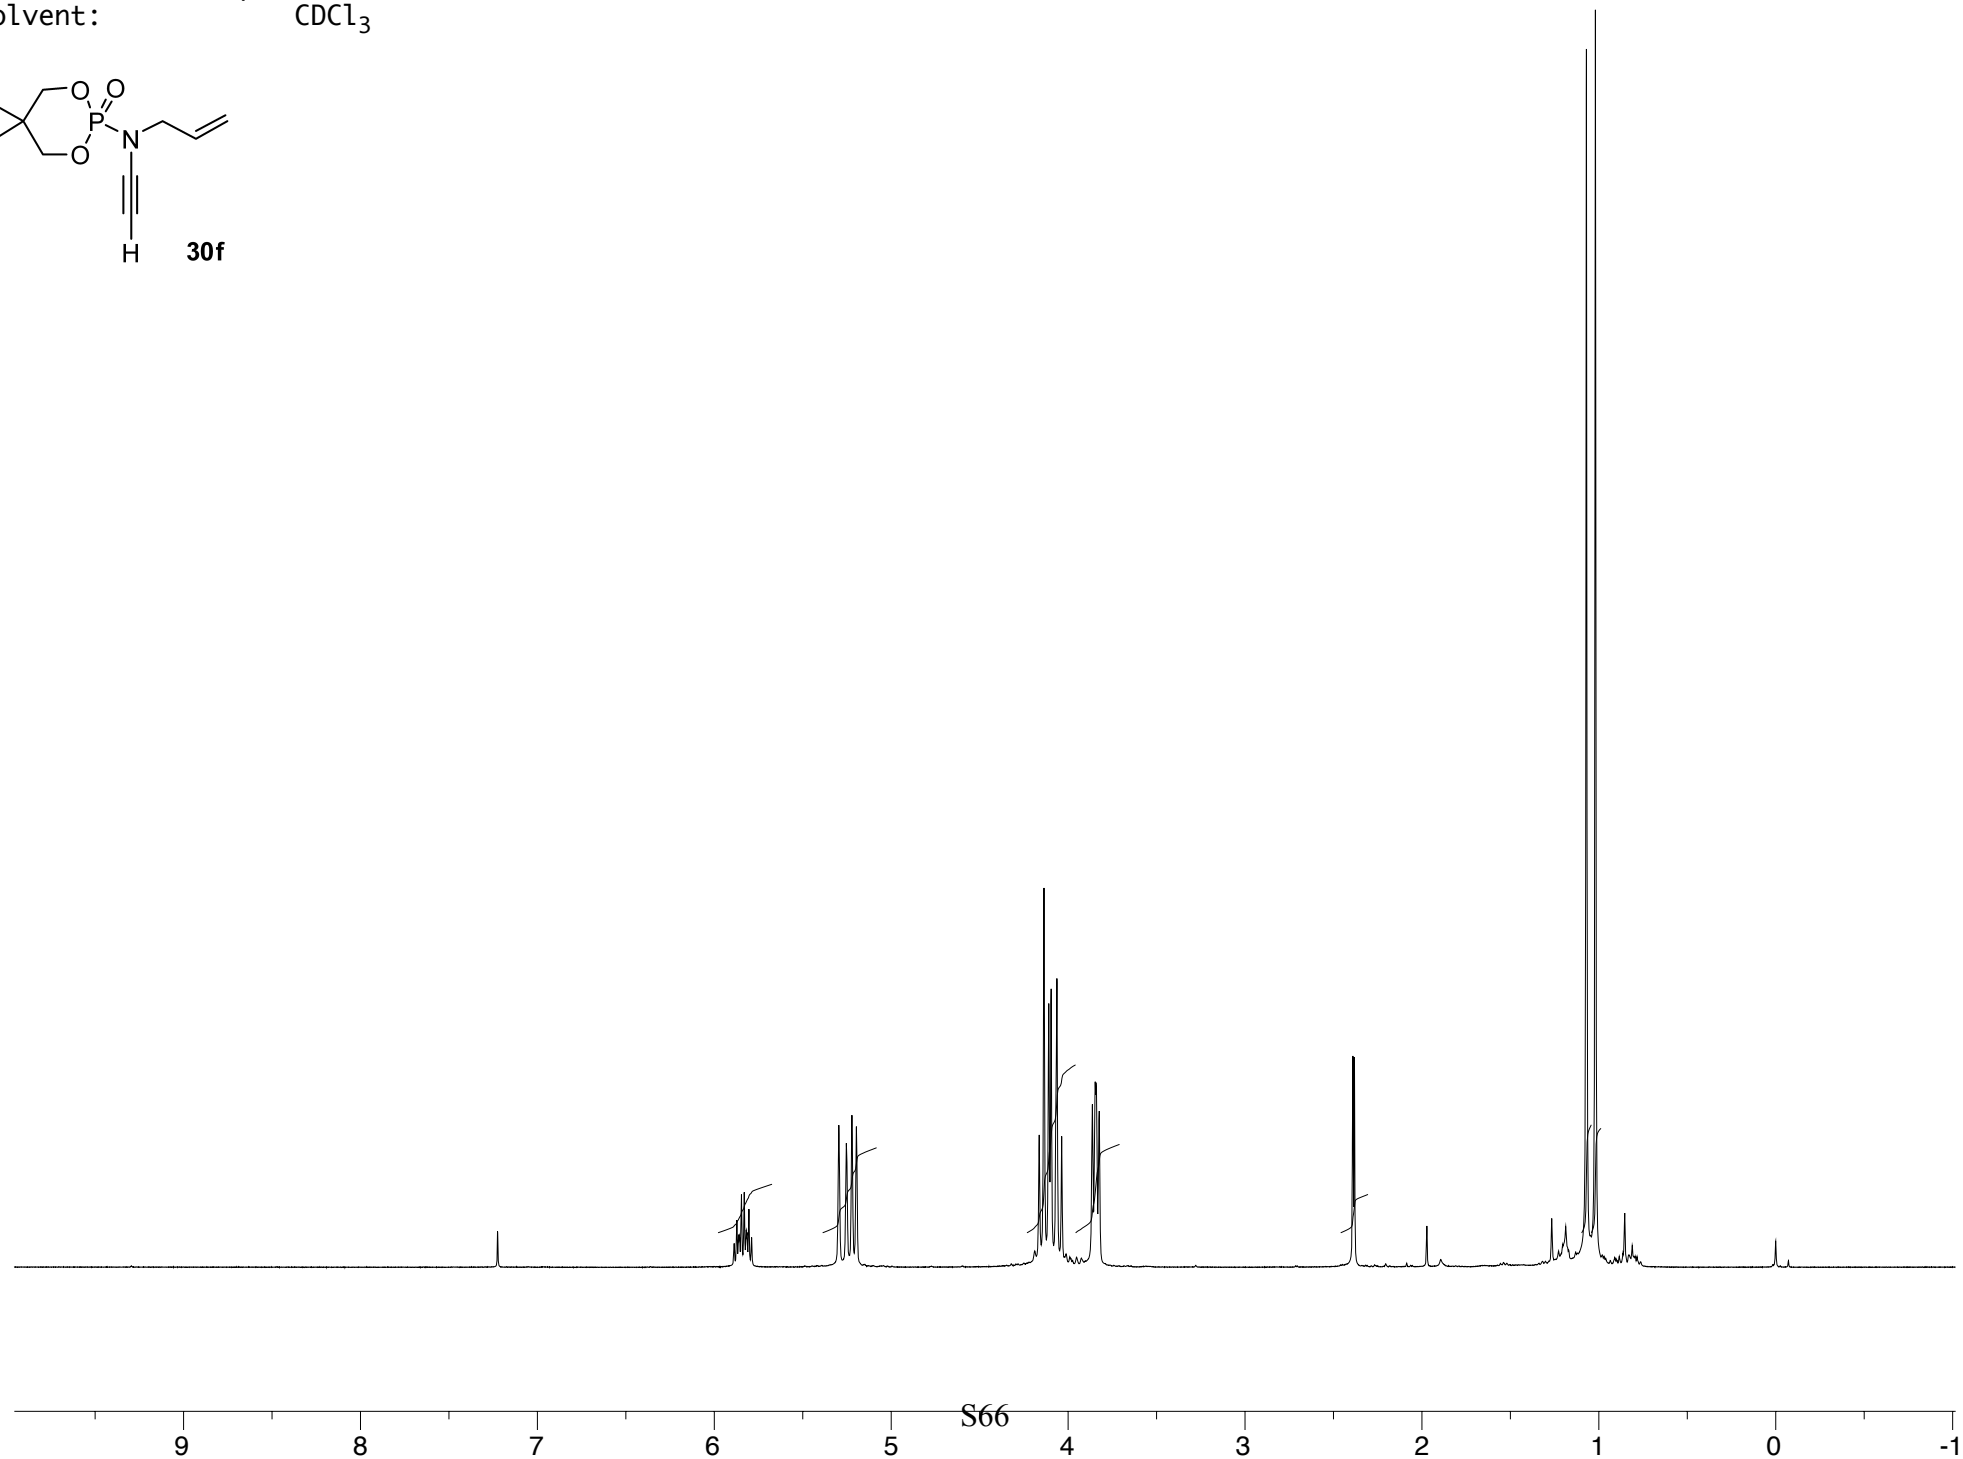

KAD-03-096\_26May2011

Pulse Sequence: s2pu1  
Spectrometer Freq.: 100.54 MHz  
Solvent: CDCl<sub>3</sub>

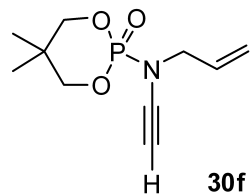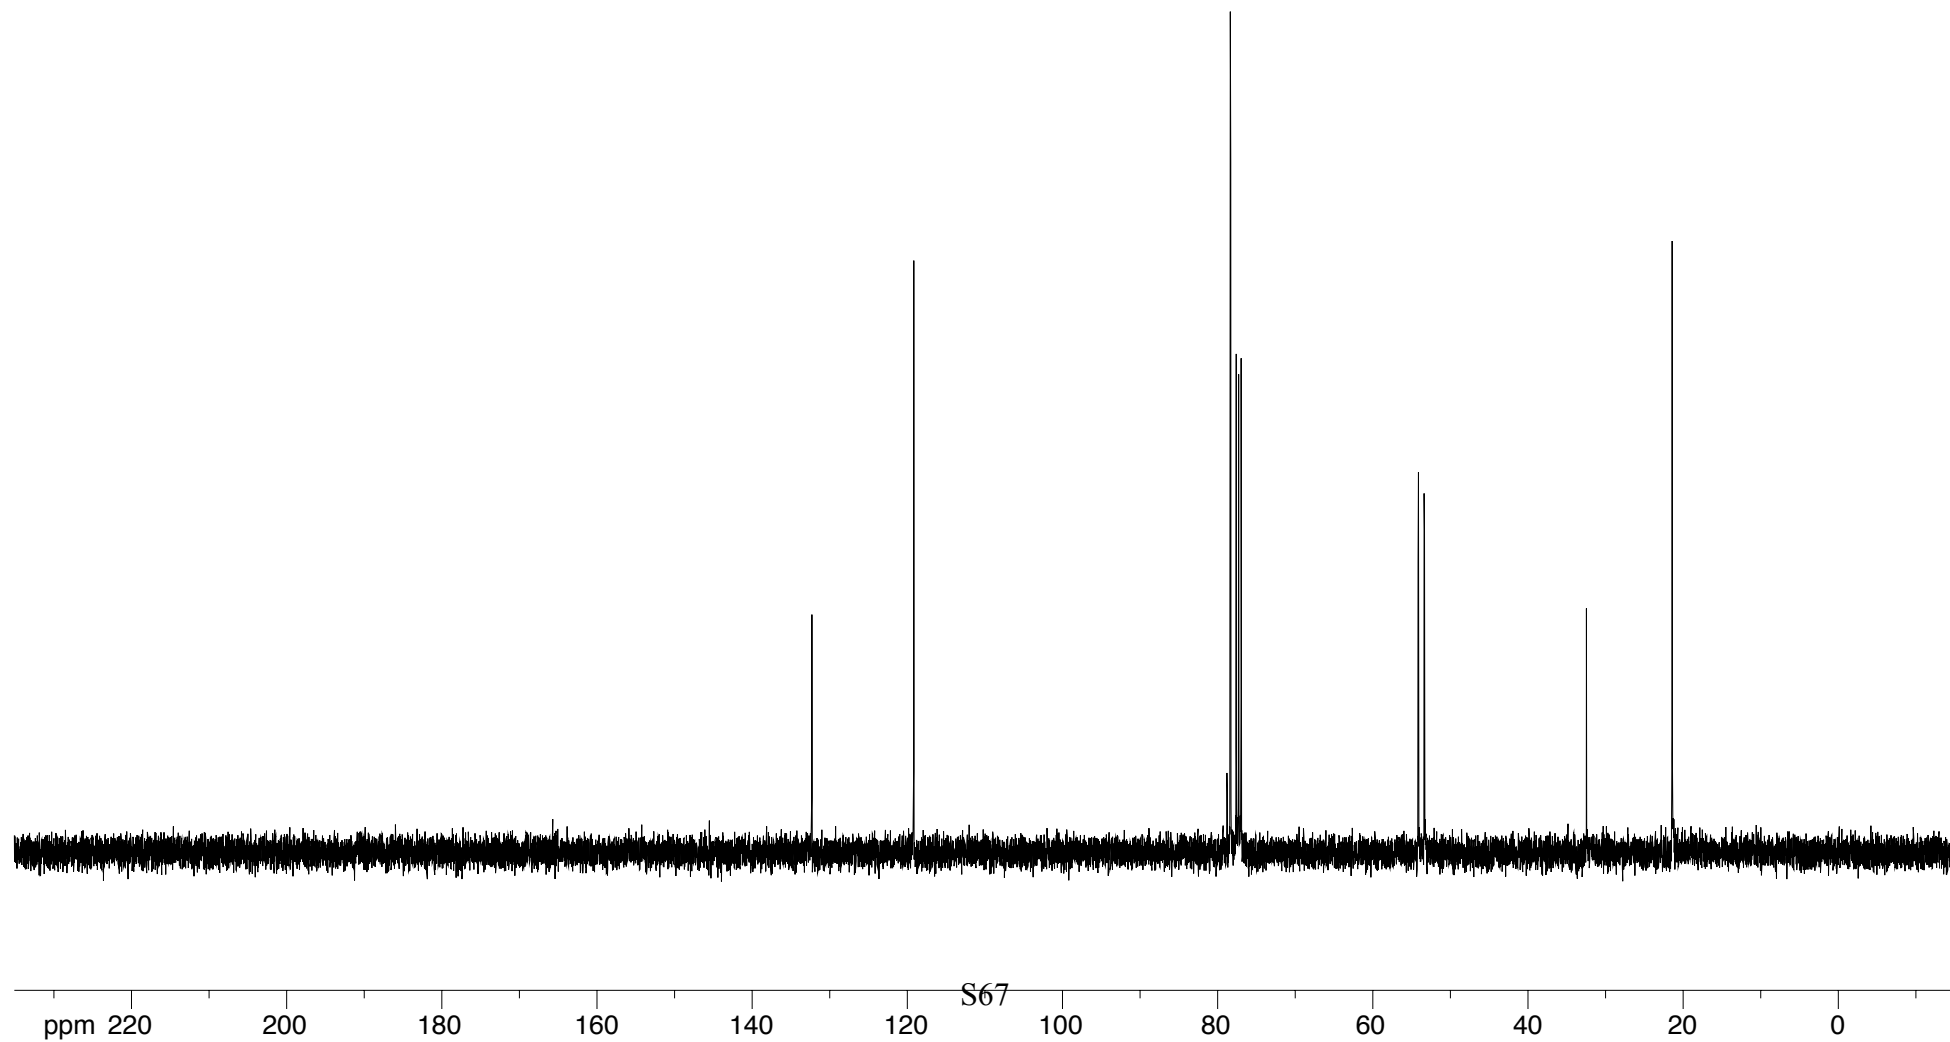

S67

KAD-03-096\_26May2011

Pulse Sequence: s2pul  
Spectrometer Freq.: 161.85 MHz  
Solvent: CDCl<sub>3</sub>

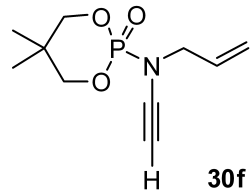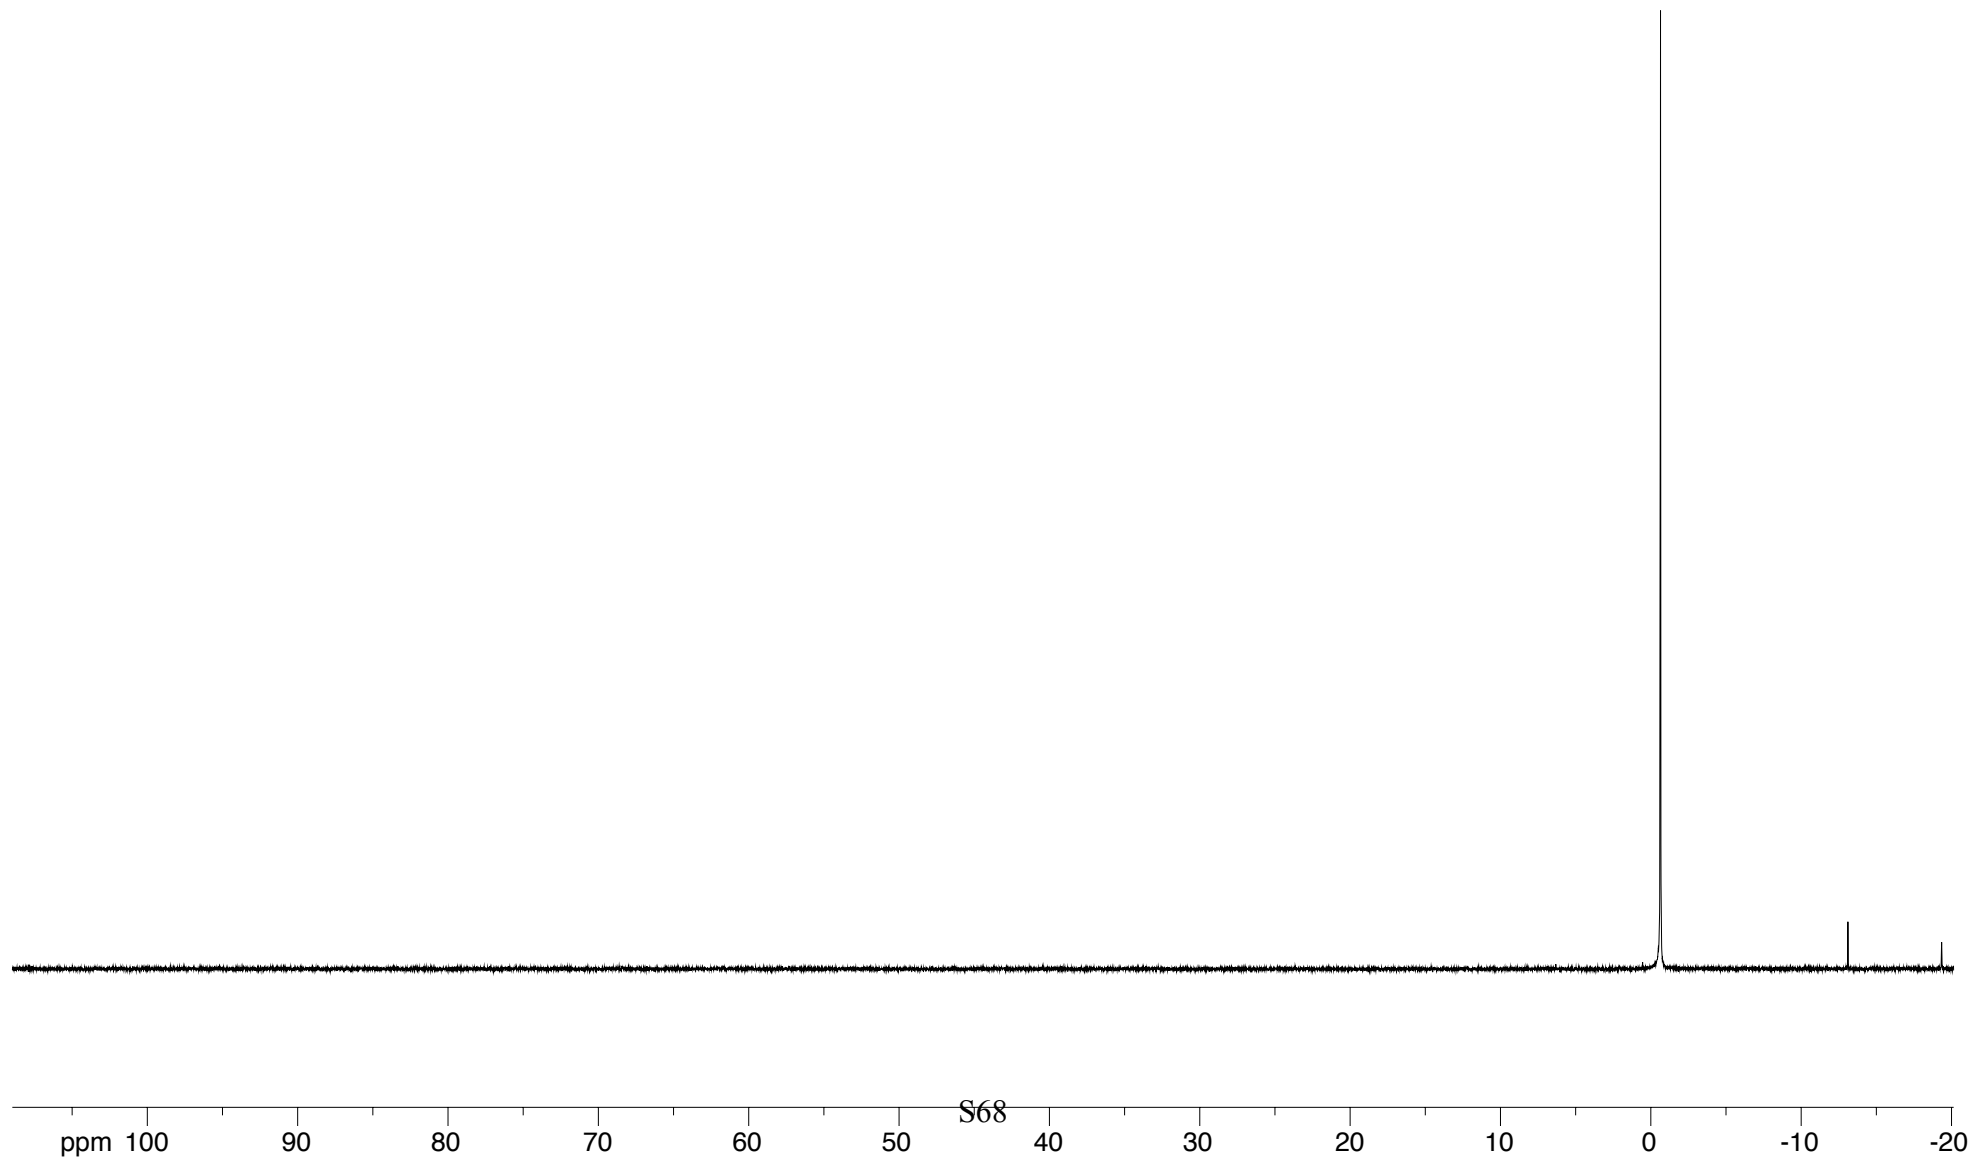

S68

wxn44-1\_26Oct2011

Archive directory: /export/home/xiaona/vnmrsys/data  
Sample directory: wxn44-1\_26Oct2011

Pulse Sequence: s2pul

Solvent: CDCl3  
Temp. 25.0 C / 298.1 K  
File: PROTON  
INOVA-500 "nmr03"

Relax. delay 1.000 sec  
Pulse 45.0 degrees  
Acq. time 3.754 sec  
Width 6387.7 Hz  
8 repetitions  
OBSERVE H1, 399.7865077 MHz  
DATA PROCESSING  
FT size 65536  
Total time 0 min, 57 sec

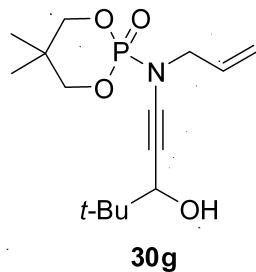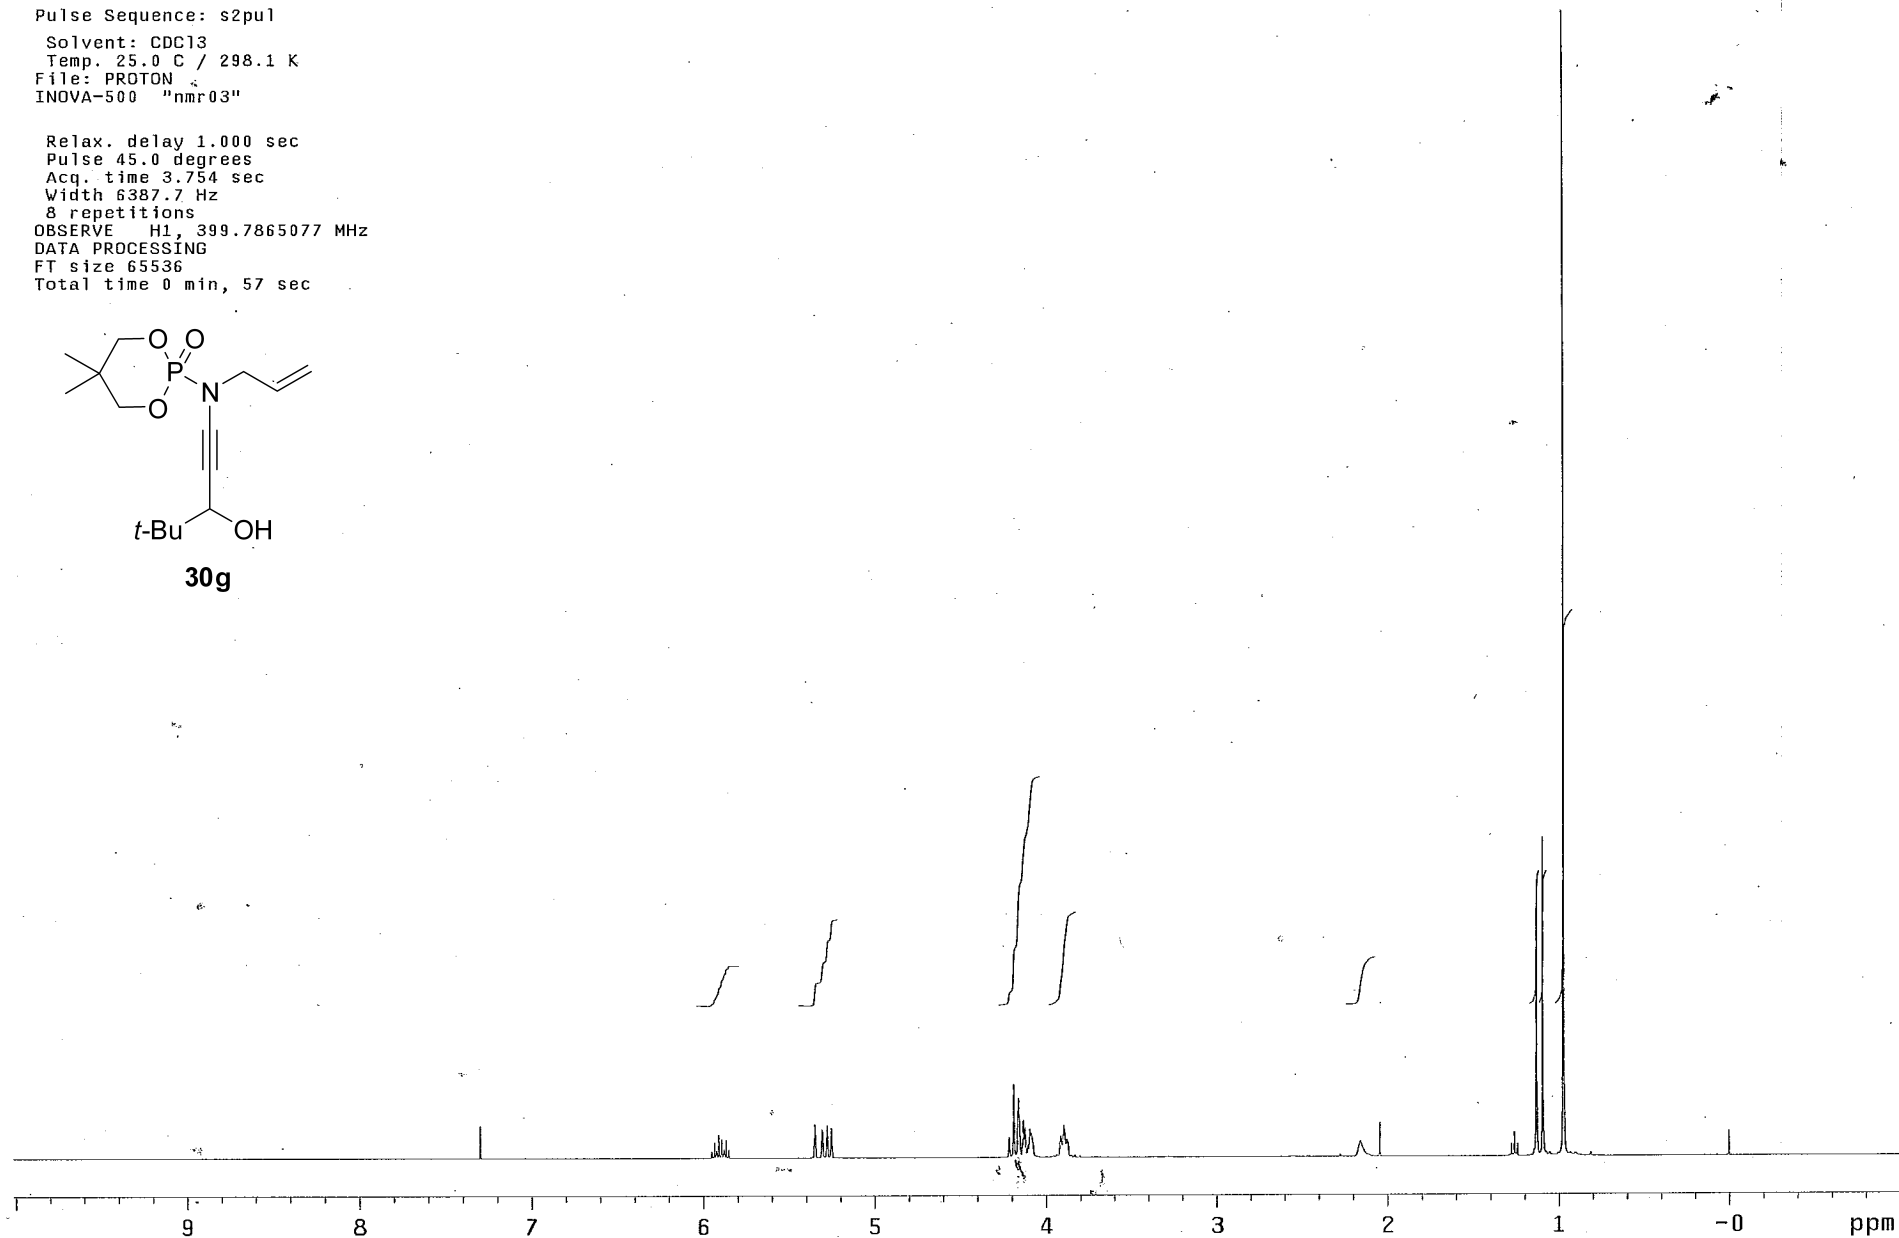

wxn44-1\_26Oct2011-17:29:17

Archive directory: /export/home/xiaona/vnmrsys/data  
Sample directory: wxn44-1\_26Oct2011-17:29:17

Pulse Sequence: s2pul

Solvent: CDCl3  
Temp. 25.0 C / 298.1 K  
File: CARBON  
INNOVA-500 "nmr03"

Relax. delay 1.000 sec  
Pulse 45.0 degrees  
Acq. time 1.197 sec  
Width 25157.2 Hz  
406 repetitions  
OBSERVE C13, 100.5264076 MHz  
DECOUPLE H1, 399.7885243 MHz  
Power 41 dB  
continuously on  
WALTZ-16 modulated  
DATA PROCESSING  
Line broadening 0.8 Hz  
FT size 65536  
Total time 18 min, 49 sec

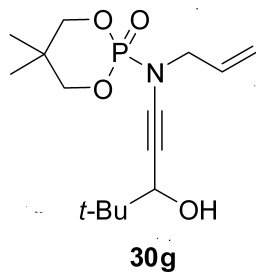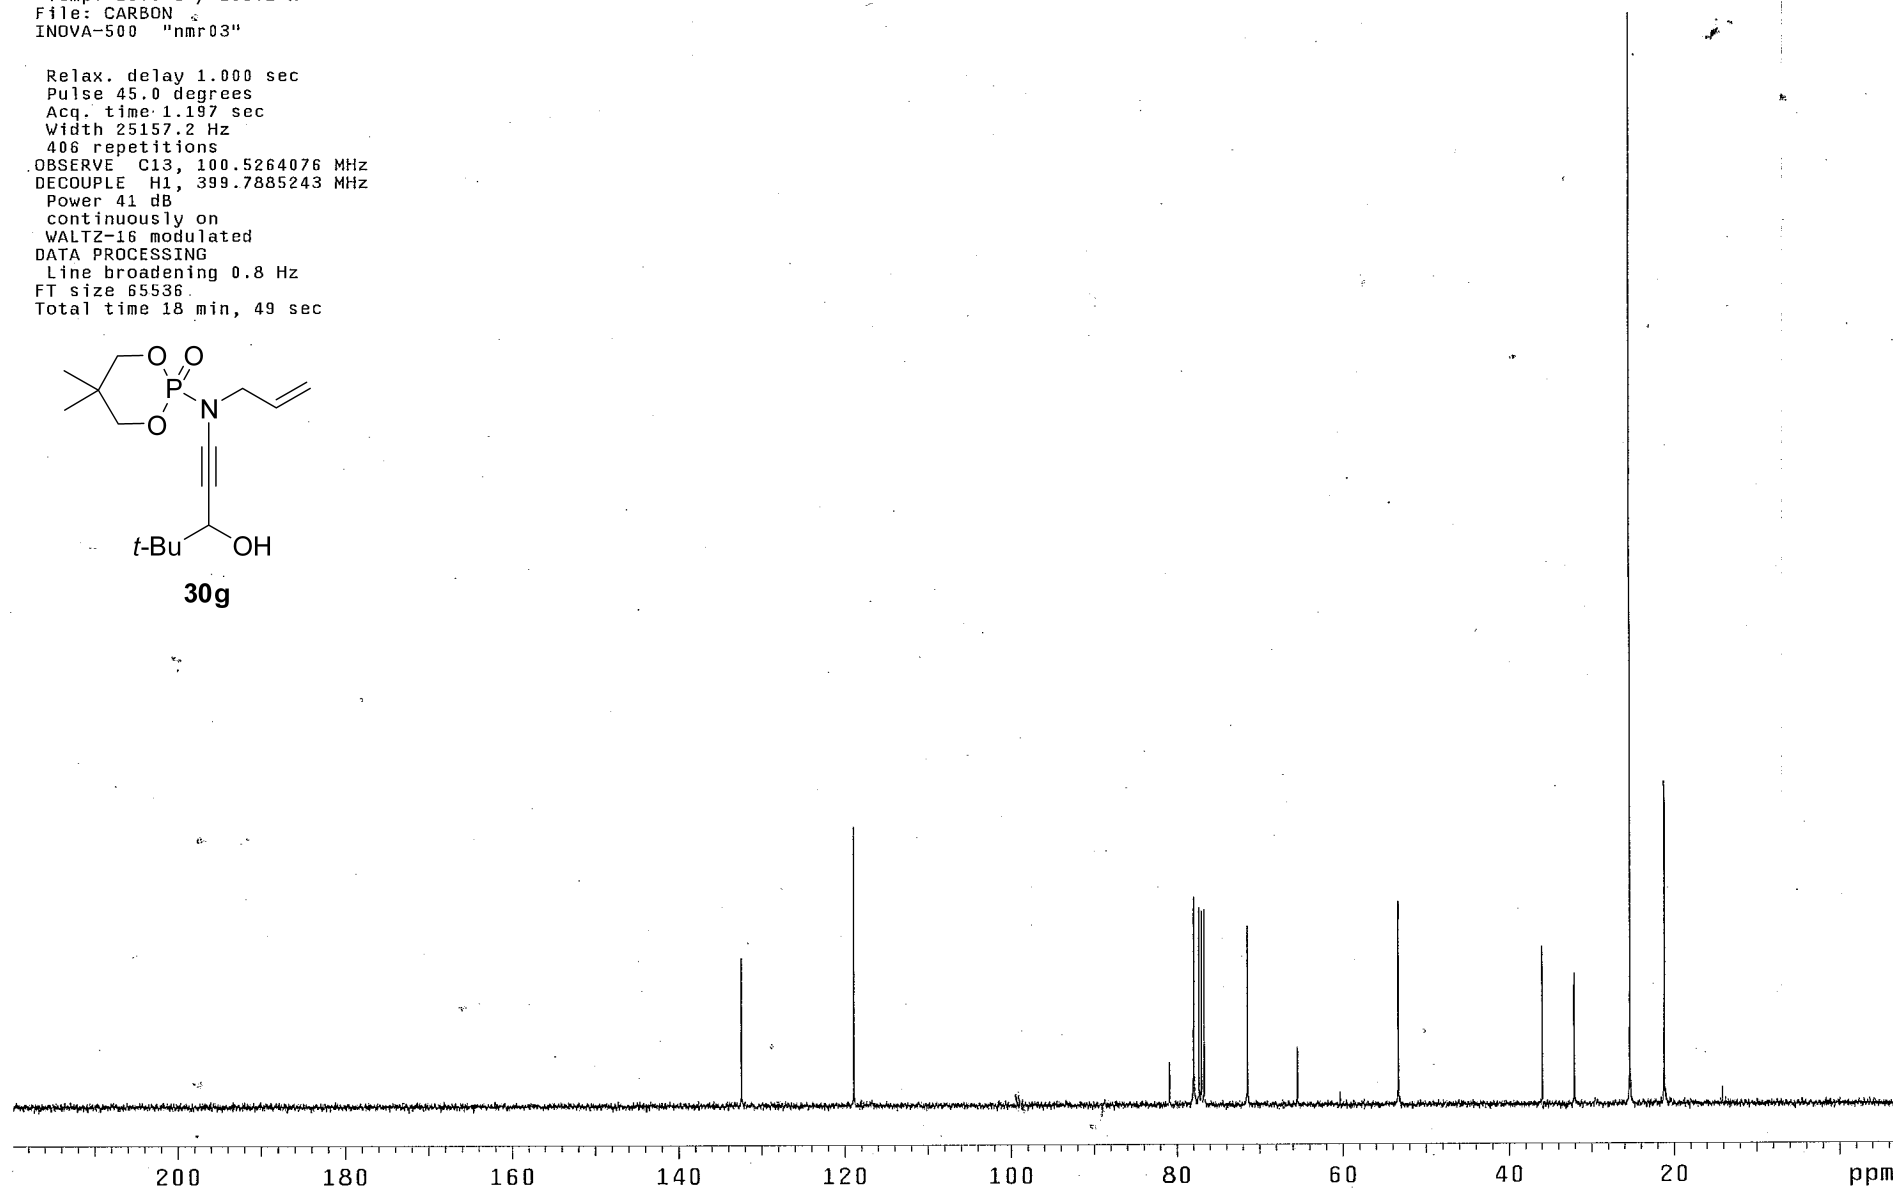

wxn44-1\_26Oct2011-17:29:17

Archive directory: /export/home/xiaona/vnmrsys/data  
Sample directory: wxn44-1\_26Oct2011-17:29:17

Pulse Sequence: s2pul

Solvent: CDCl3  
Temp. 25.0 C / 298.1 K  
File: PHOSPHORUS  
INOVA-500 "nmr03"

Relax. delay 1.000 sec  
Pulse 35.0 degrees  
Acq. time 0.799 sec  
Width 35650.6 Hz  
64 repetitions  
OBSERVE P31, 161.8363711 MHz  
DECOUPLE H1, 399.7885243 MHz  
Power 41 dB  
on during acquisition  
off during delay  
WALTZ-16 modulated  
DATA PROCESSING  
Line broadening 1.0 Hz  
FT size 65536  
Total time 2 min, 2 sec

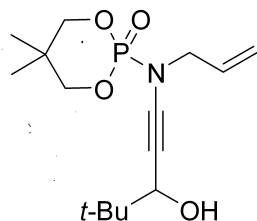

30g

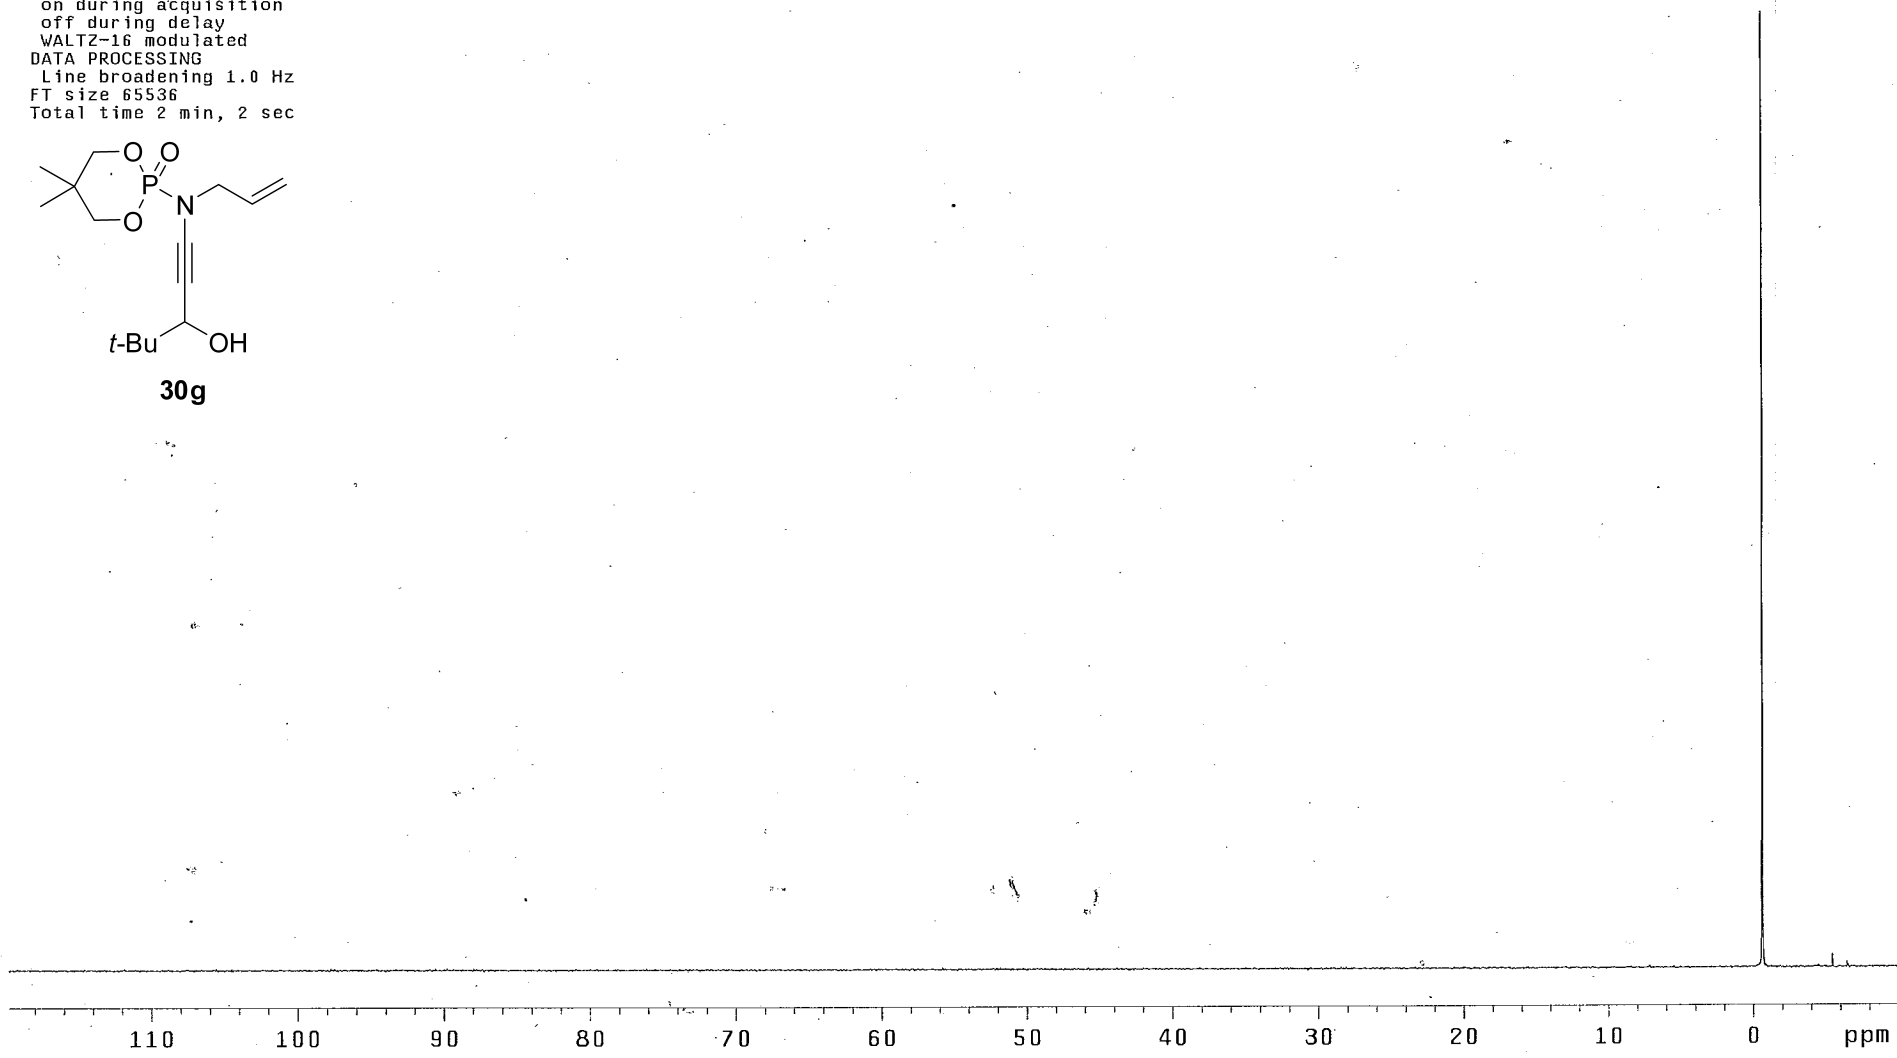

wxn47-1\_29Oct2011

Archive directory: /export/home/xiaona/vnmrsys/data  
Sample directory: wxn47-1\_29Oct2011

Pulse Sequence: s2pu1

Solvent: CDCl3  
Temp. 25.0 C / 298.1 K  
File: PROTON  
INOVA-500 "nmr03"

Relax. delay 1.000 sec  
Pulse 45.0 degrees  
Acq. time 3.754 sec  
Width 6387.7 Hz  
8 repetitions  
OBSERVE H1, 399.7865356 MHz  
DATA PROCESSING  
FT size 65536  
Total time 0 min, 57 sec

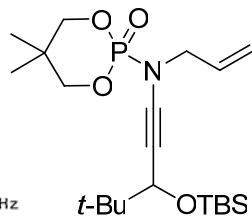

30d

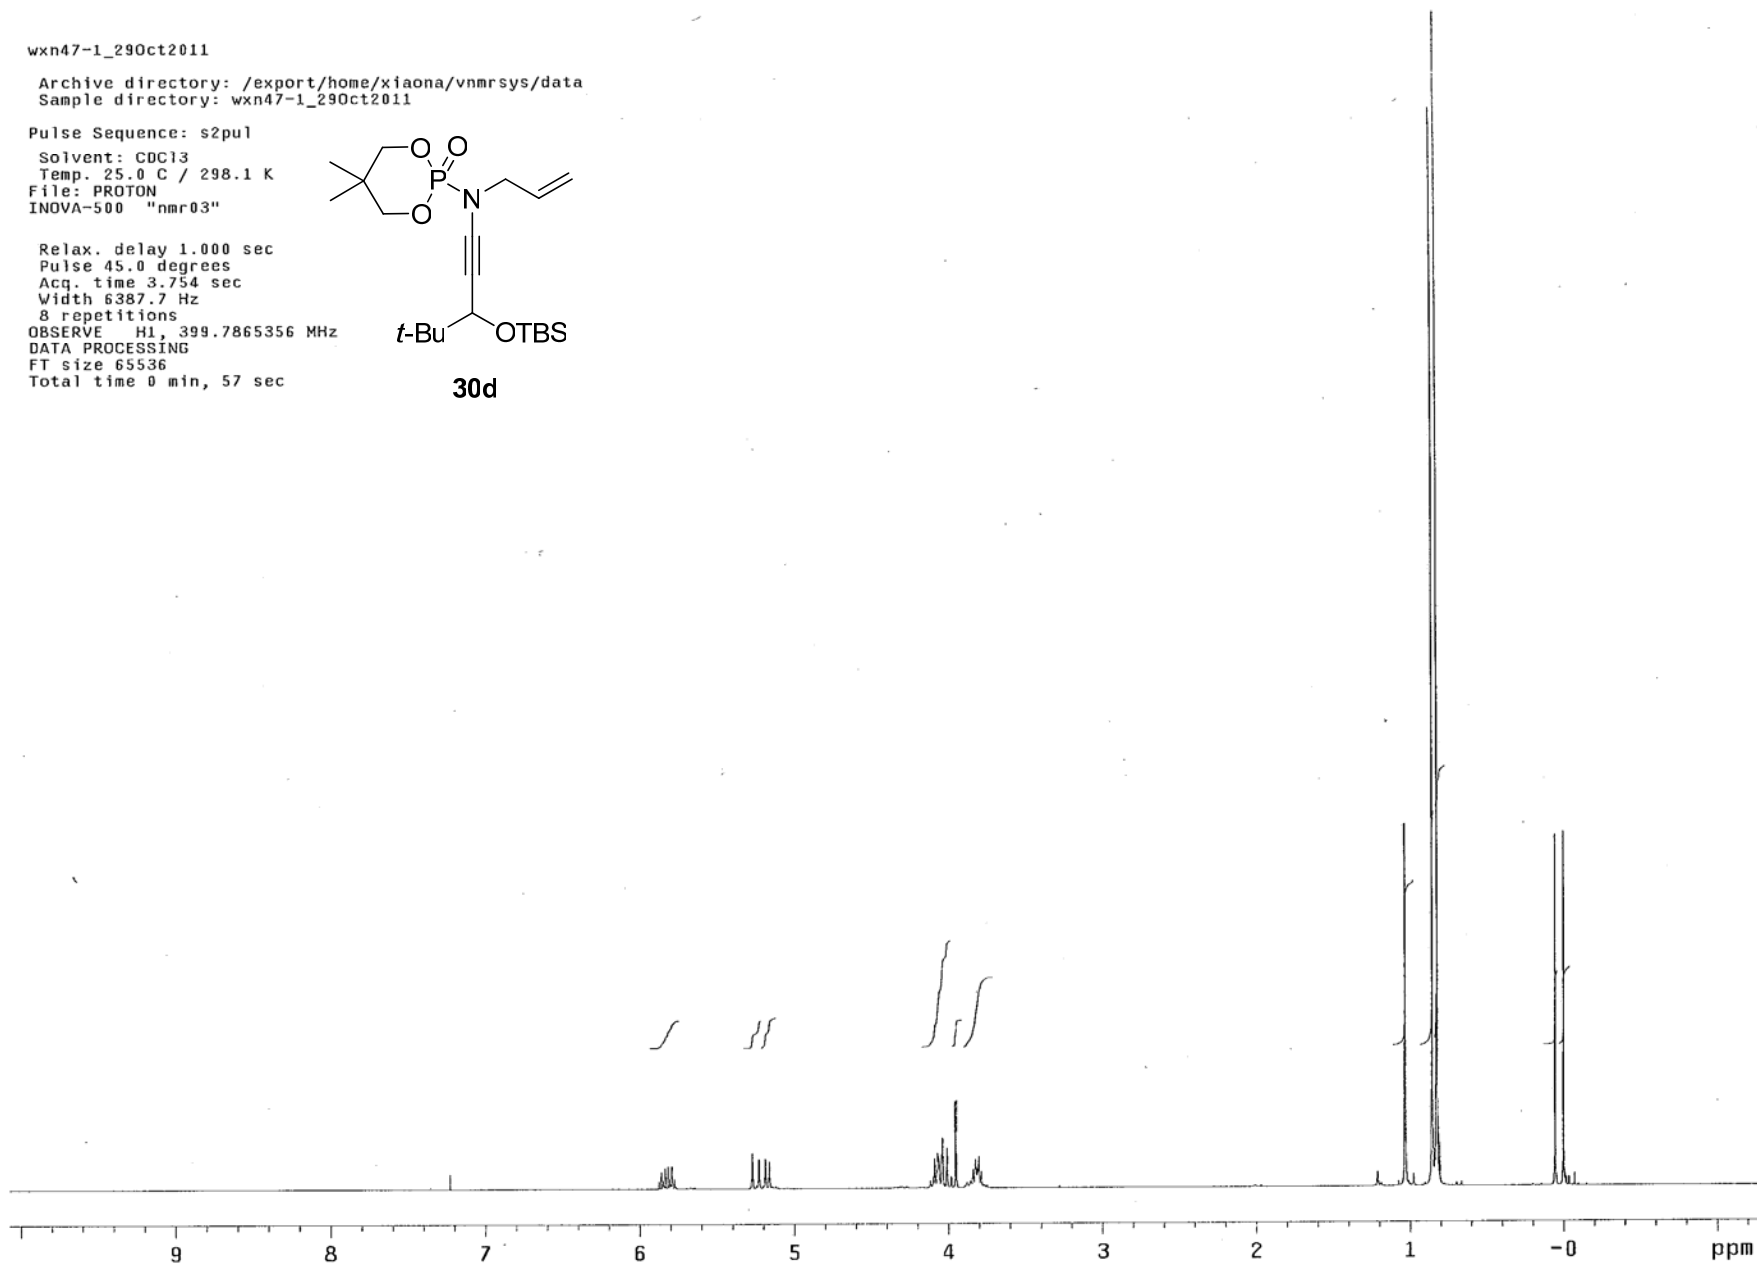



wxn47-1\_29Oct2011

Archive directory: /export/home/xiaona/vnmrsys/data  
Sample directory: wxn47-1\_29Oct2011

Pulse Sequence: s2pul

Solvent: CDC13  
Temp. 25.0 C / 298.1 K  
File: CARBON  
INOVA-500 "nmr03"

Relax. delay 1.000 sec  
Pulse 45.0 degrees  
Acq. time 1.197 sec  
Width 25157.2 Hz  
436 repetitions  
OBSERVE C13, 100.5264076 MHz  
DECOUPLE H1, 399.7885243 MHz  
Power 41 dB  
continuously on  
WALTZ-16 modulated  
DATA PROCESSING  
Line broadening 0.8 Hz  
FT size 65536  
Total time 18 min, 49 sec

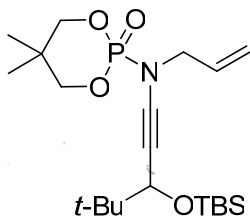

30d

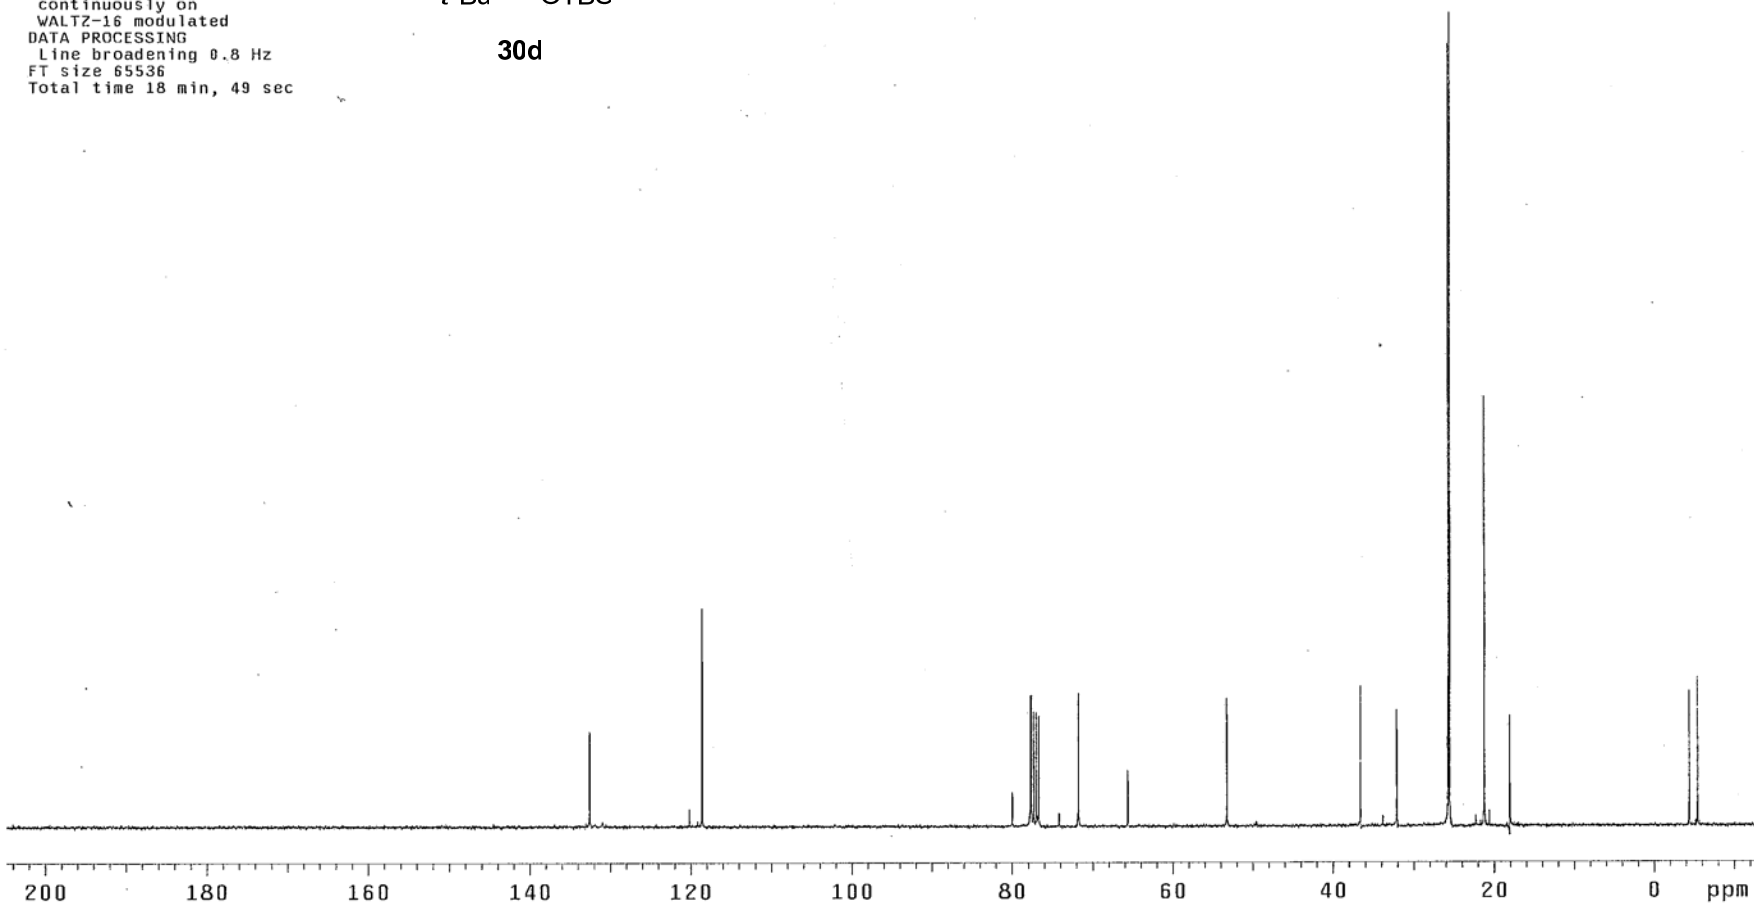

wxn47-1\_29Oct2011

Archive directory: /export/home/xiaona/vnmrsys/data  
Sample directory: wxn47-1\_29Oct2011

Pulse Sequence: s2pu1

Solvent: CDCl3  
Temp. 25.0 C / 298.1 K  
File: PHOSPHORUS  
INOVA-500 "nmr03"

Relax. delay 1.000 sec  
Pulse 35.0 degrees  
Acq. time 0.799 sec  
Width 35650.6 Hz  
64 repetitions  
OBSERVE P31, 161.8363711 MHz  
DECOUPLE H1, 399.7885243 MHz  
Power 41 dB  
on during acquisition  
off during delay  
WALTZ-16 modulated  
DATA PROCESSING  
Line broadening 1.0 Hz  
FT size 65536  
Total time 2 min, 2 sec

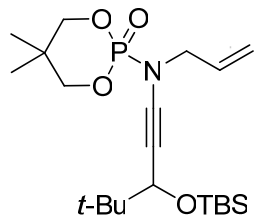

30d

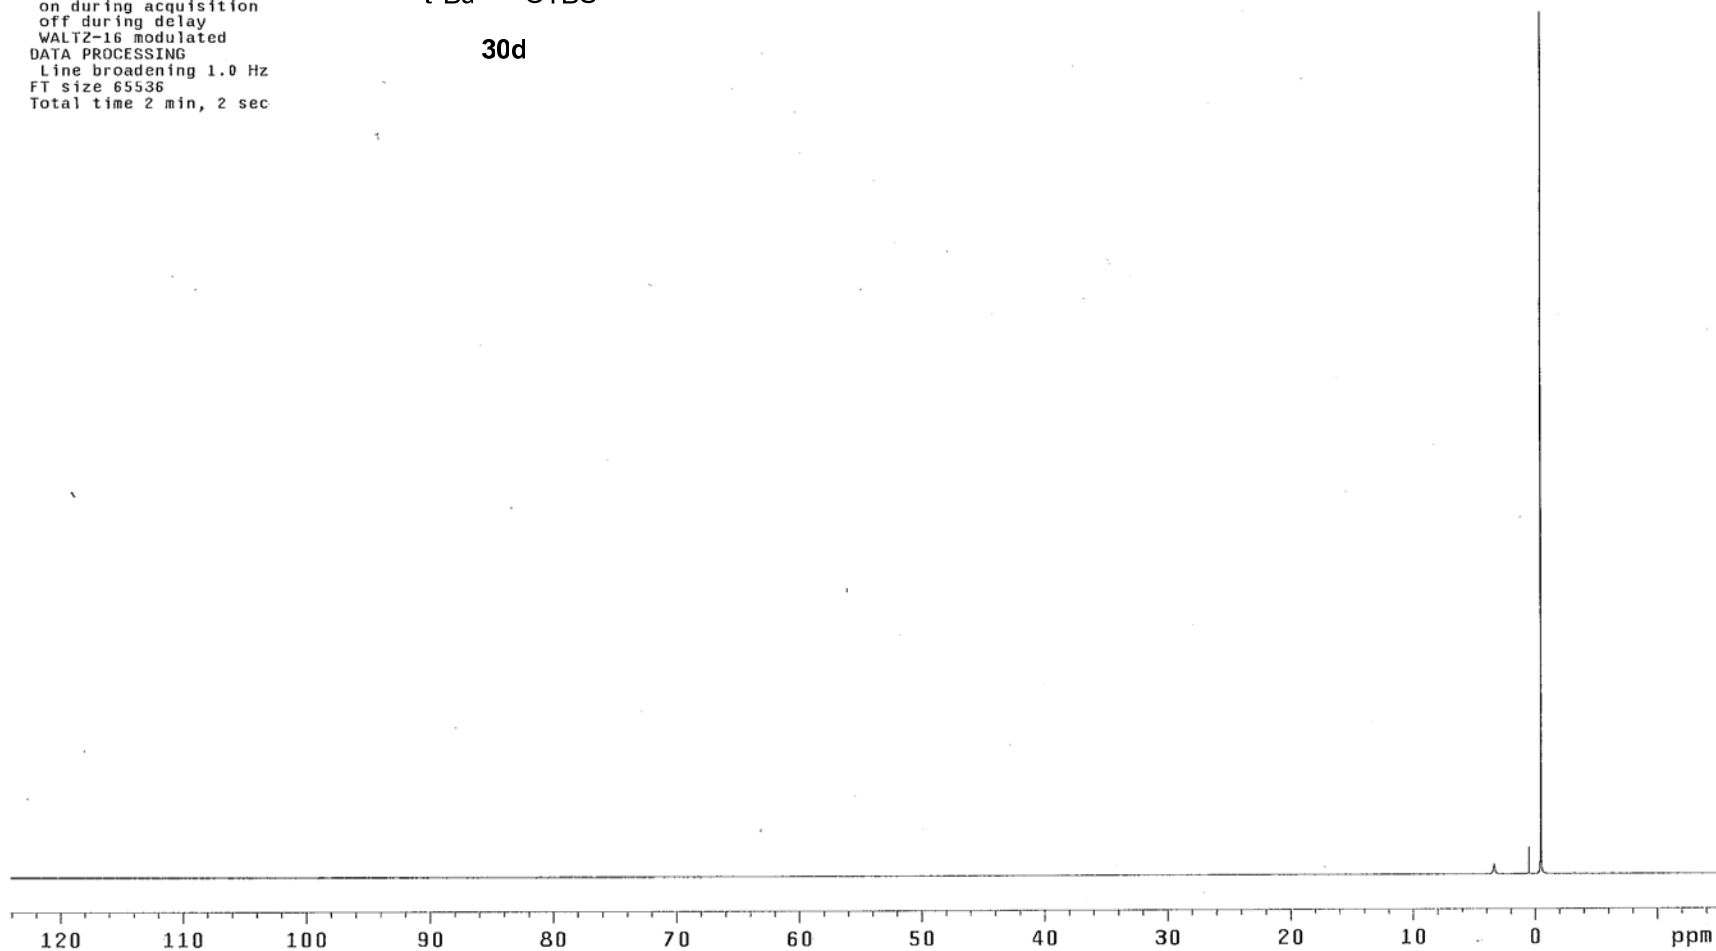

wxn72-1\_02Dec2011-14:32:33

Archive directory: /export/home/xiaona/vnmrsys/data  
Sample directory: wxn72-1\_02Dec2011-14:32:33

Pulse Sequence: s2pul

Solvent: CDCl3  
Temp. 25.0 C / 298.1 K  
File: PROTON  
INOVA-500 "nmr03"

Relax. delay 1.000 sec  
Pulse 45.0 degrees  
Acq. time 3.754 sec  
Width 6387.7 Hz  
8 repetitions  
OBSERVE H1, 399.7865290 MHz  
DATA PROCESSING  
FT size 65536  
Total time 0 min, 57 sec

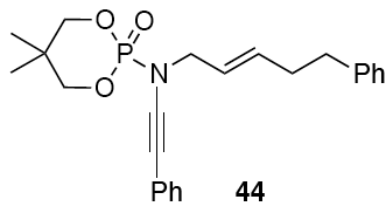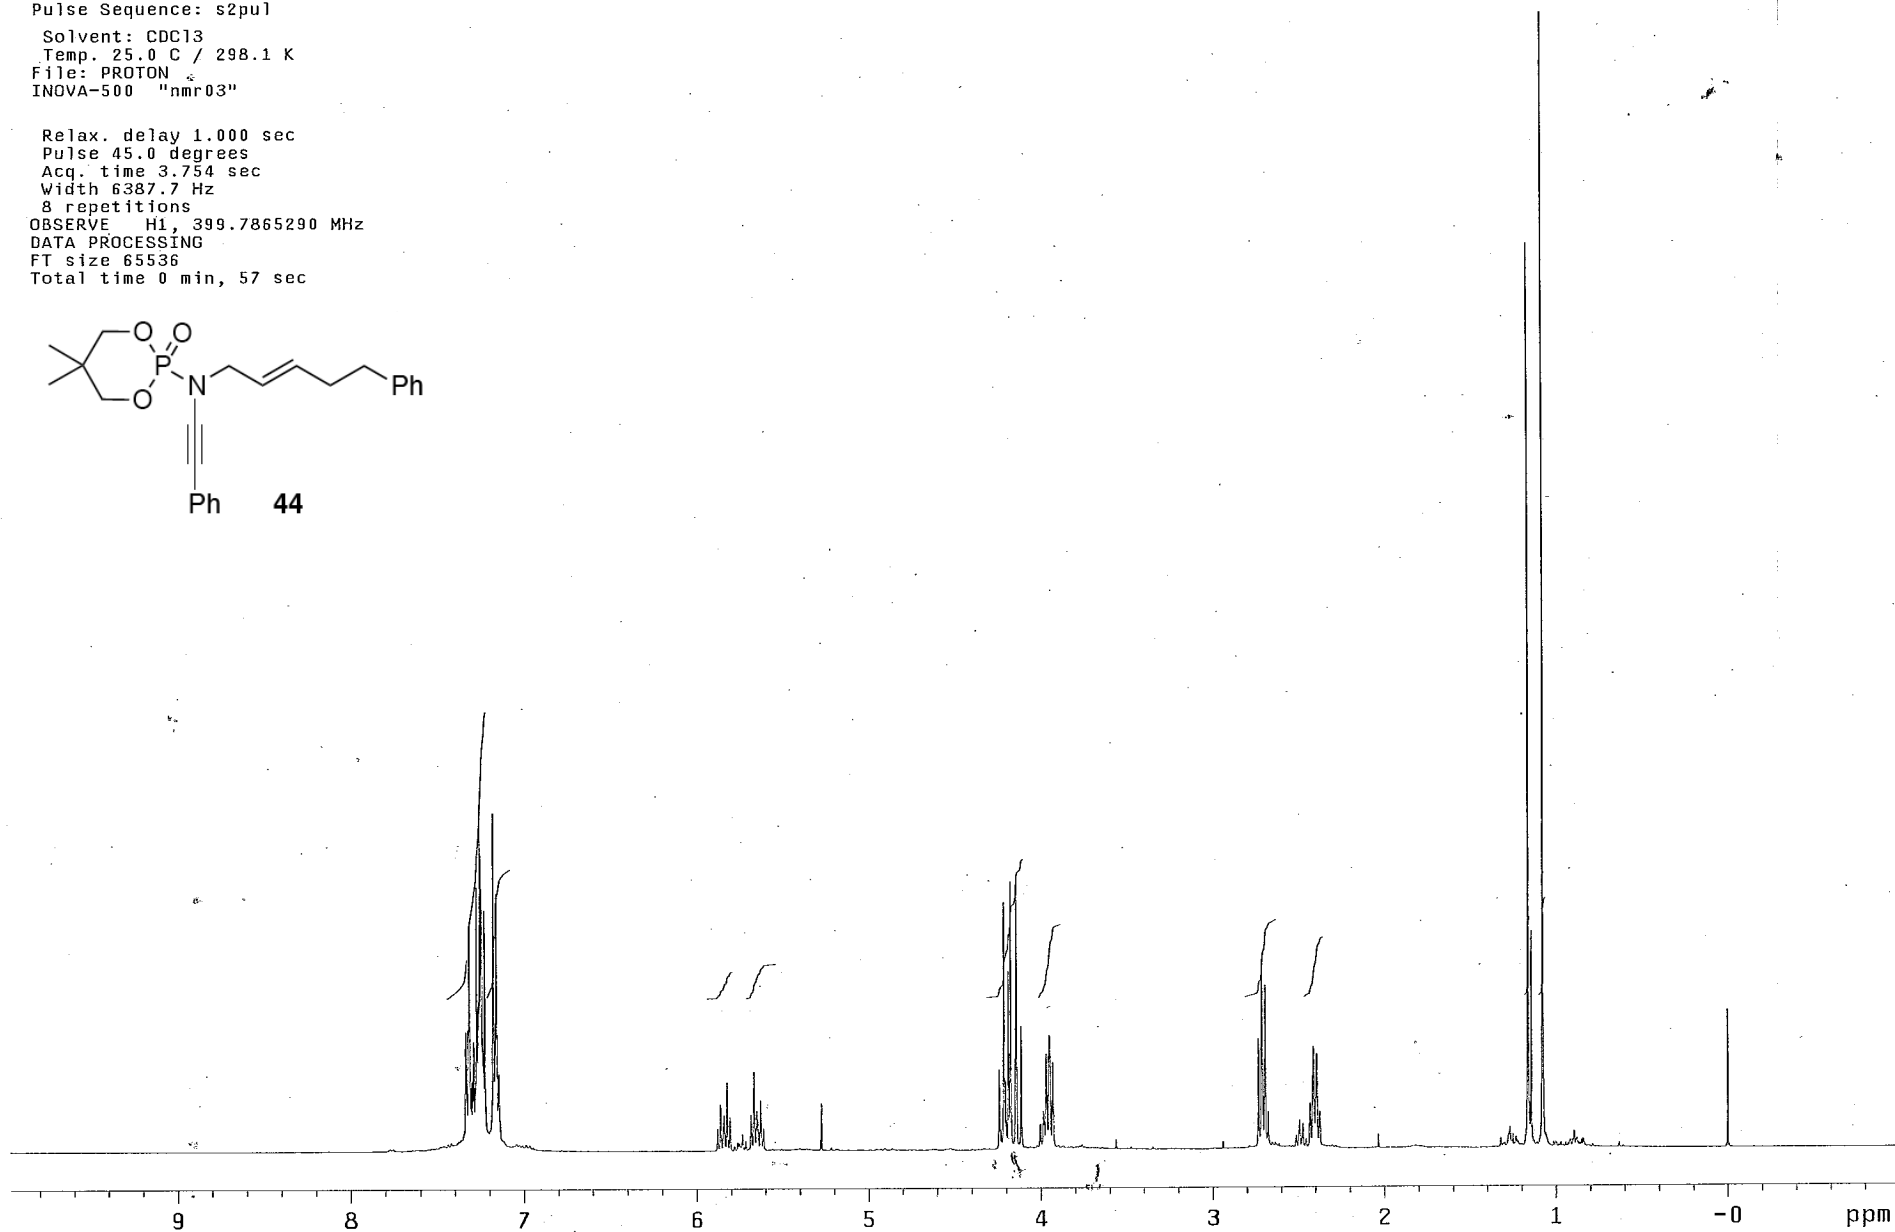

wxn72-1\_02Dec2011-14:48:54

Archive directory: /export/home/xiaona/vnmrsys/data  
Sample directory: wxn72-1\_02Dec2011-14:48:54

Pulse Sequence: s2pu1

Solvent: CDCl3  
Temp. 25.0 C / 298.1 K  
File: CARBON  
INOVA-500 "nmr03"

Relax. delay 1.000 sec  
Pulse 45.0 degrees  
Acq. time 1.197 sec  
Width 25157.2 Hz  
169 repetitions  
OBSERVE C13, 100.5264429 MHz  
DECOUPLE H1, 399.7885243 MHz  
Power 41 dB  
continuously on  
WALTZ-16 modulated  
DATA PROCESSING  
Line broadening 0.8 Hz  
FT size 65536  
Total time 36 min, 45 sec

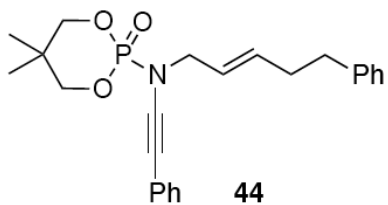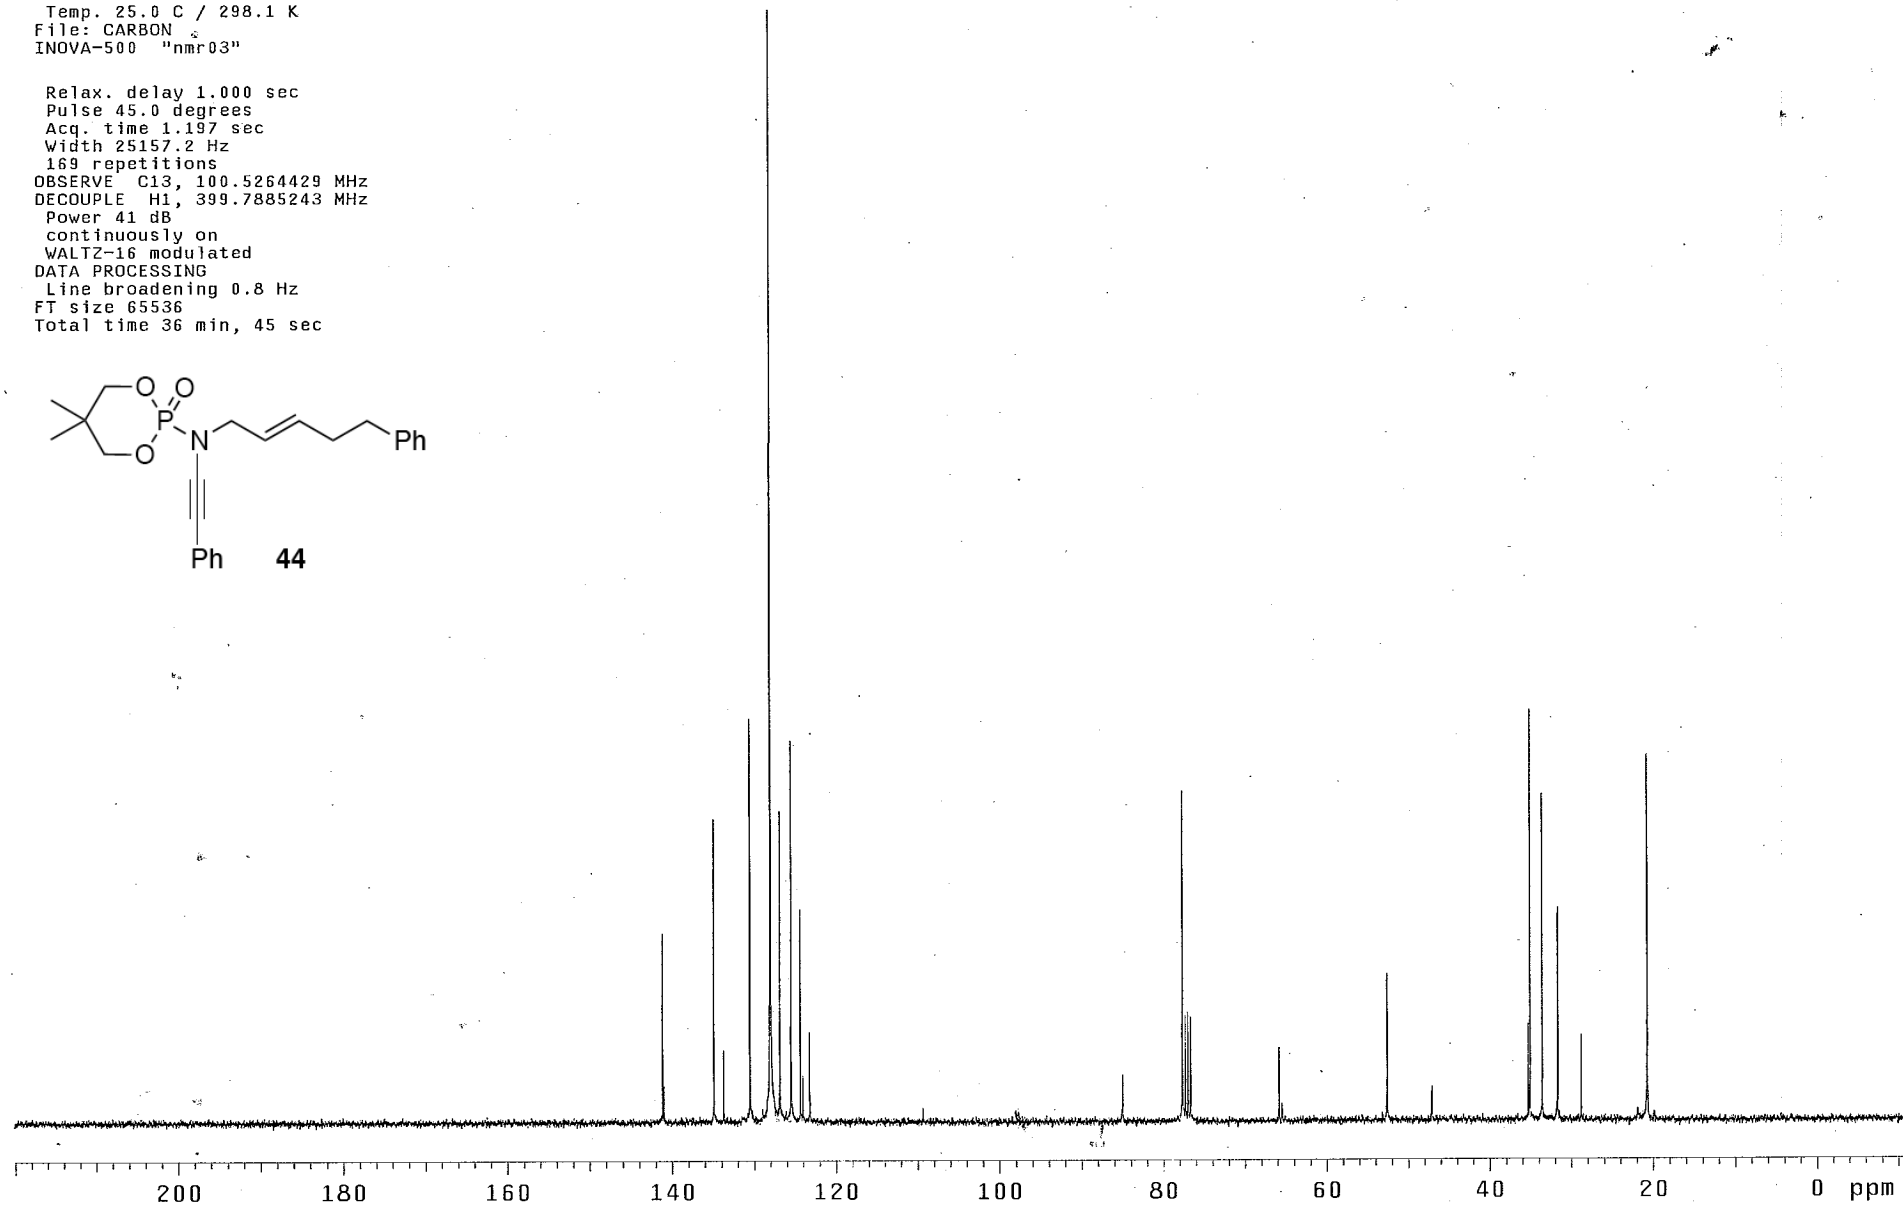

wxn72-1\_02Dec2011-10:02:07

Archive directory: /export/home/xiaona/vnmrsys/data  
Sample directory: wxn72-1\_02Dec2011-10:02:07

Pulse Sequence: s2pul

Solvent: CDCl3  
Temp. 25.0 C / 298.1 K  
File: PHOSPHORUS  
INOVA-500 "nmr03"

Relax. delay 1.000 sec  
Pulse 35.0 degrees  
Acq. time 0.800 sec  
Width 35650.6 Hz  
64 repetitions  
OBSERVE P31, 161.8363711 MHz  
DECOUPLE H1, 399.7885243 MHz  
Power 41 dB  
continuously on  
WALTZ-16 modulated  
DATA PROCESSING  
Line broadening 1.0 Hz  
FT size 65536  
Total time 2 min, 3 sec

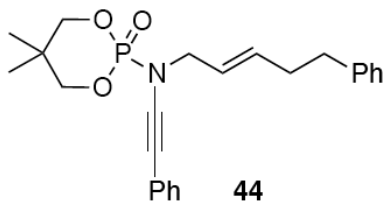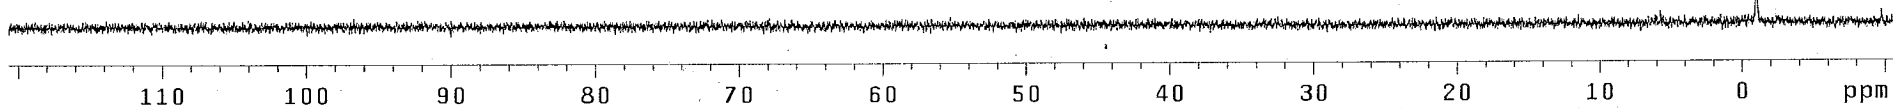

KAD-03-188\_04Feb2012

Pulse Sequence: s2pul  
Spectrometer Freq.: 499.73 MHz  
Solvent: CDCl<sub>3</sub>

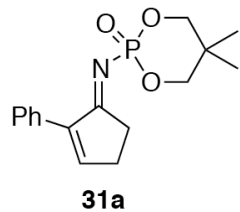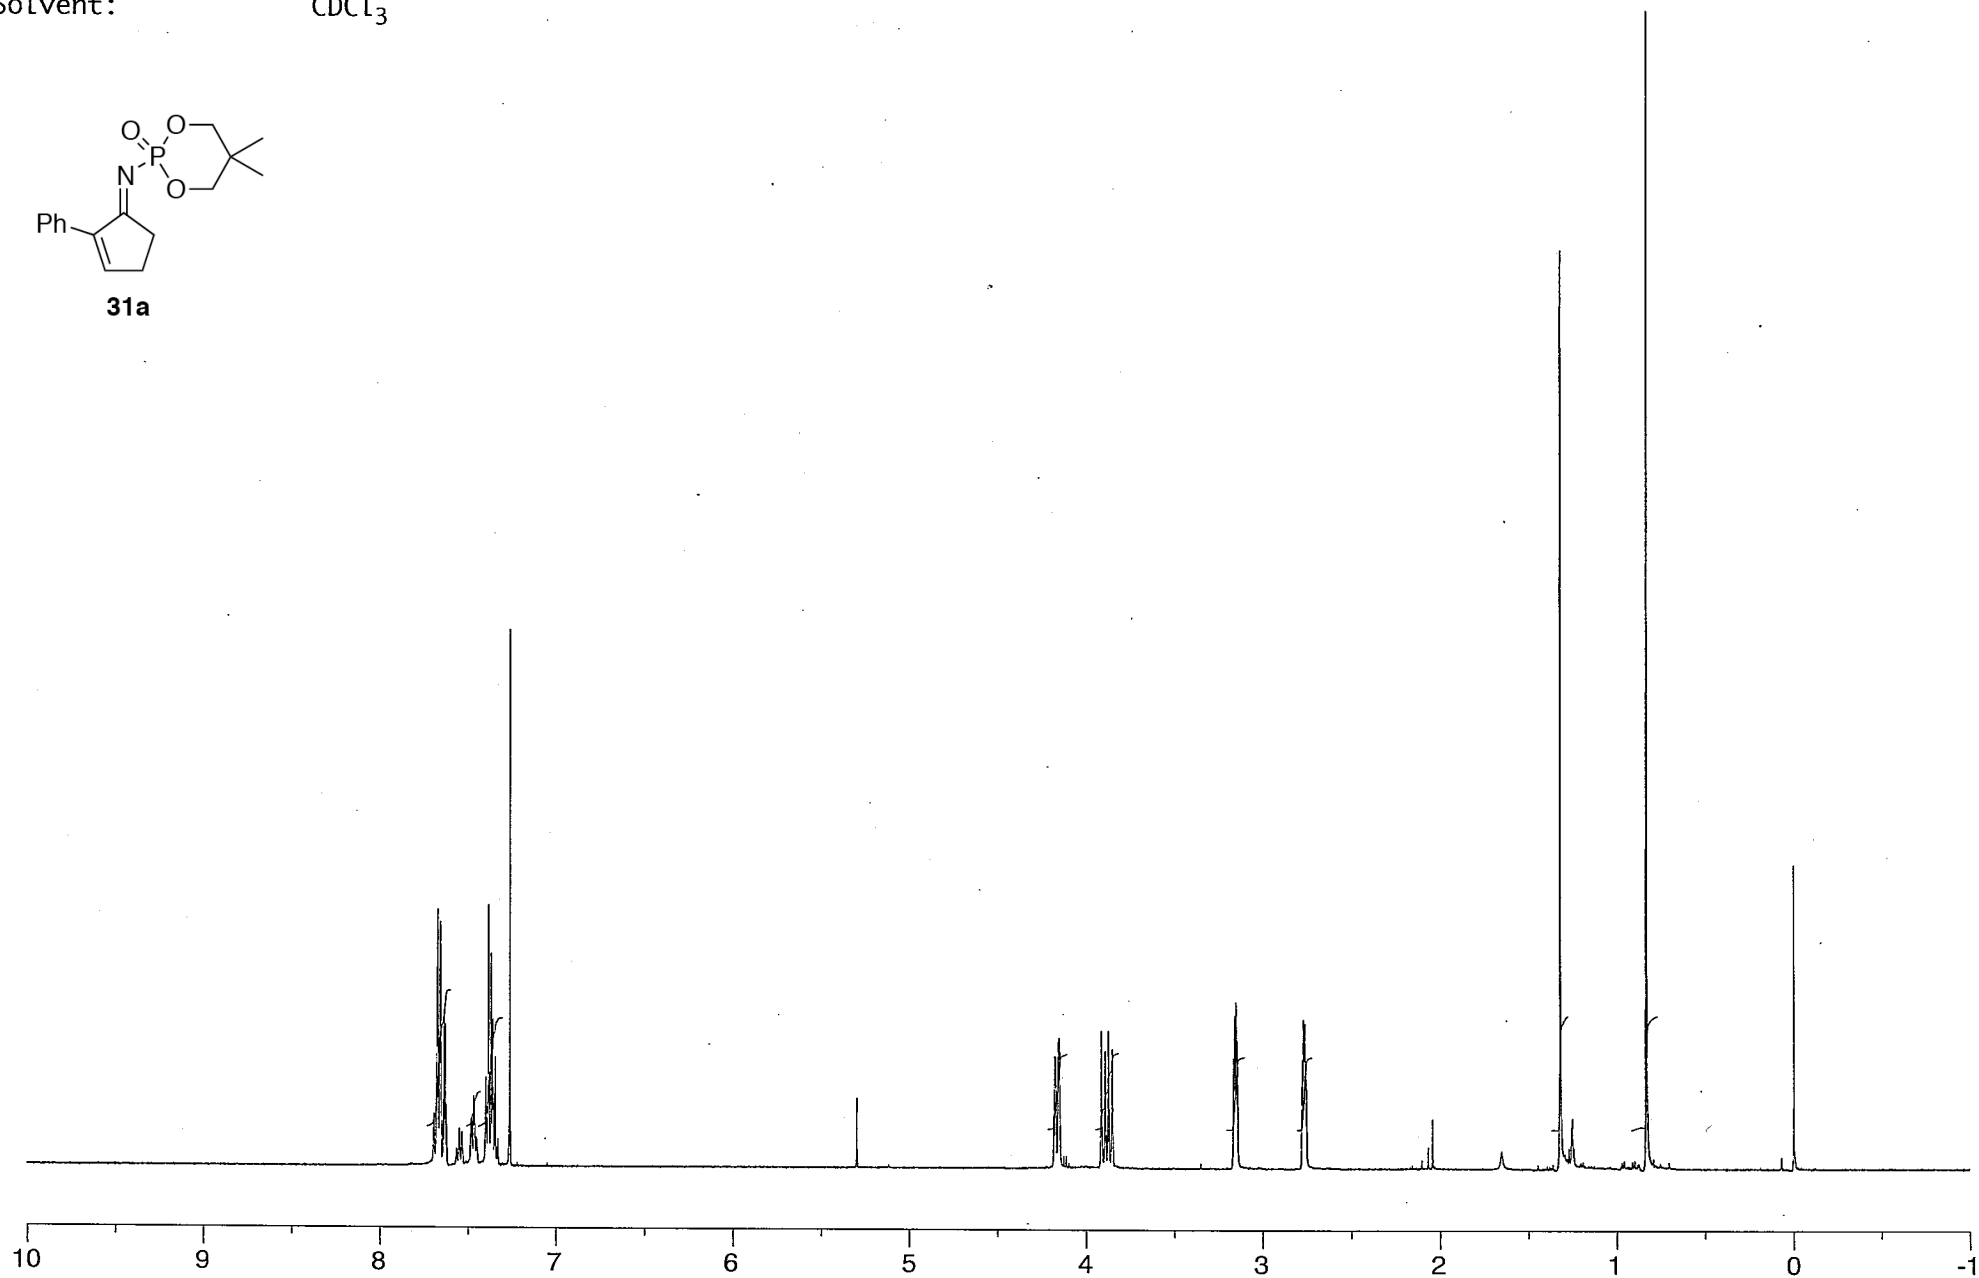

Pulse Sequence: s2pu1  
Spectrometer Freq.: 125.67 MHz  
Solvent: CDCl<sub>3</sub>

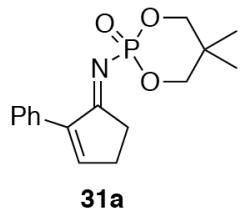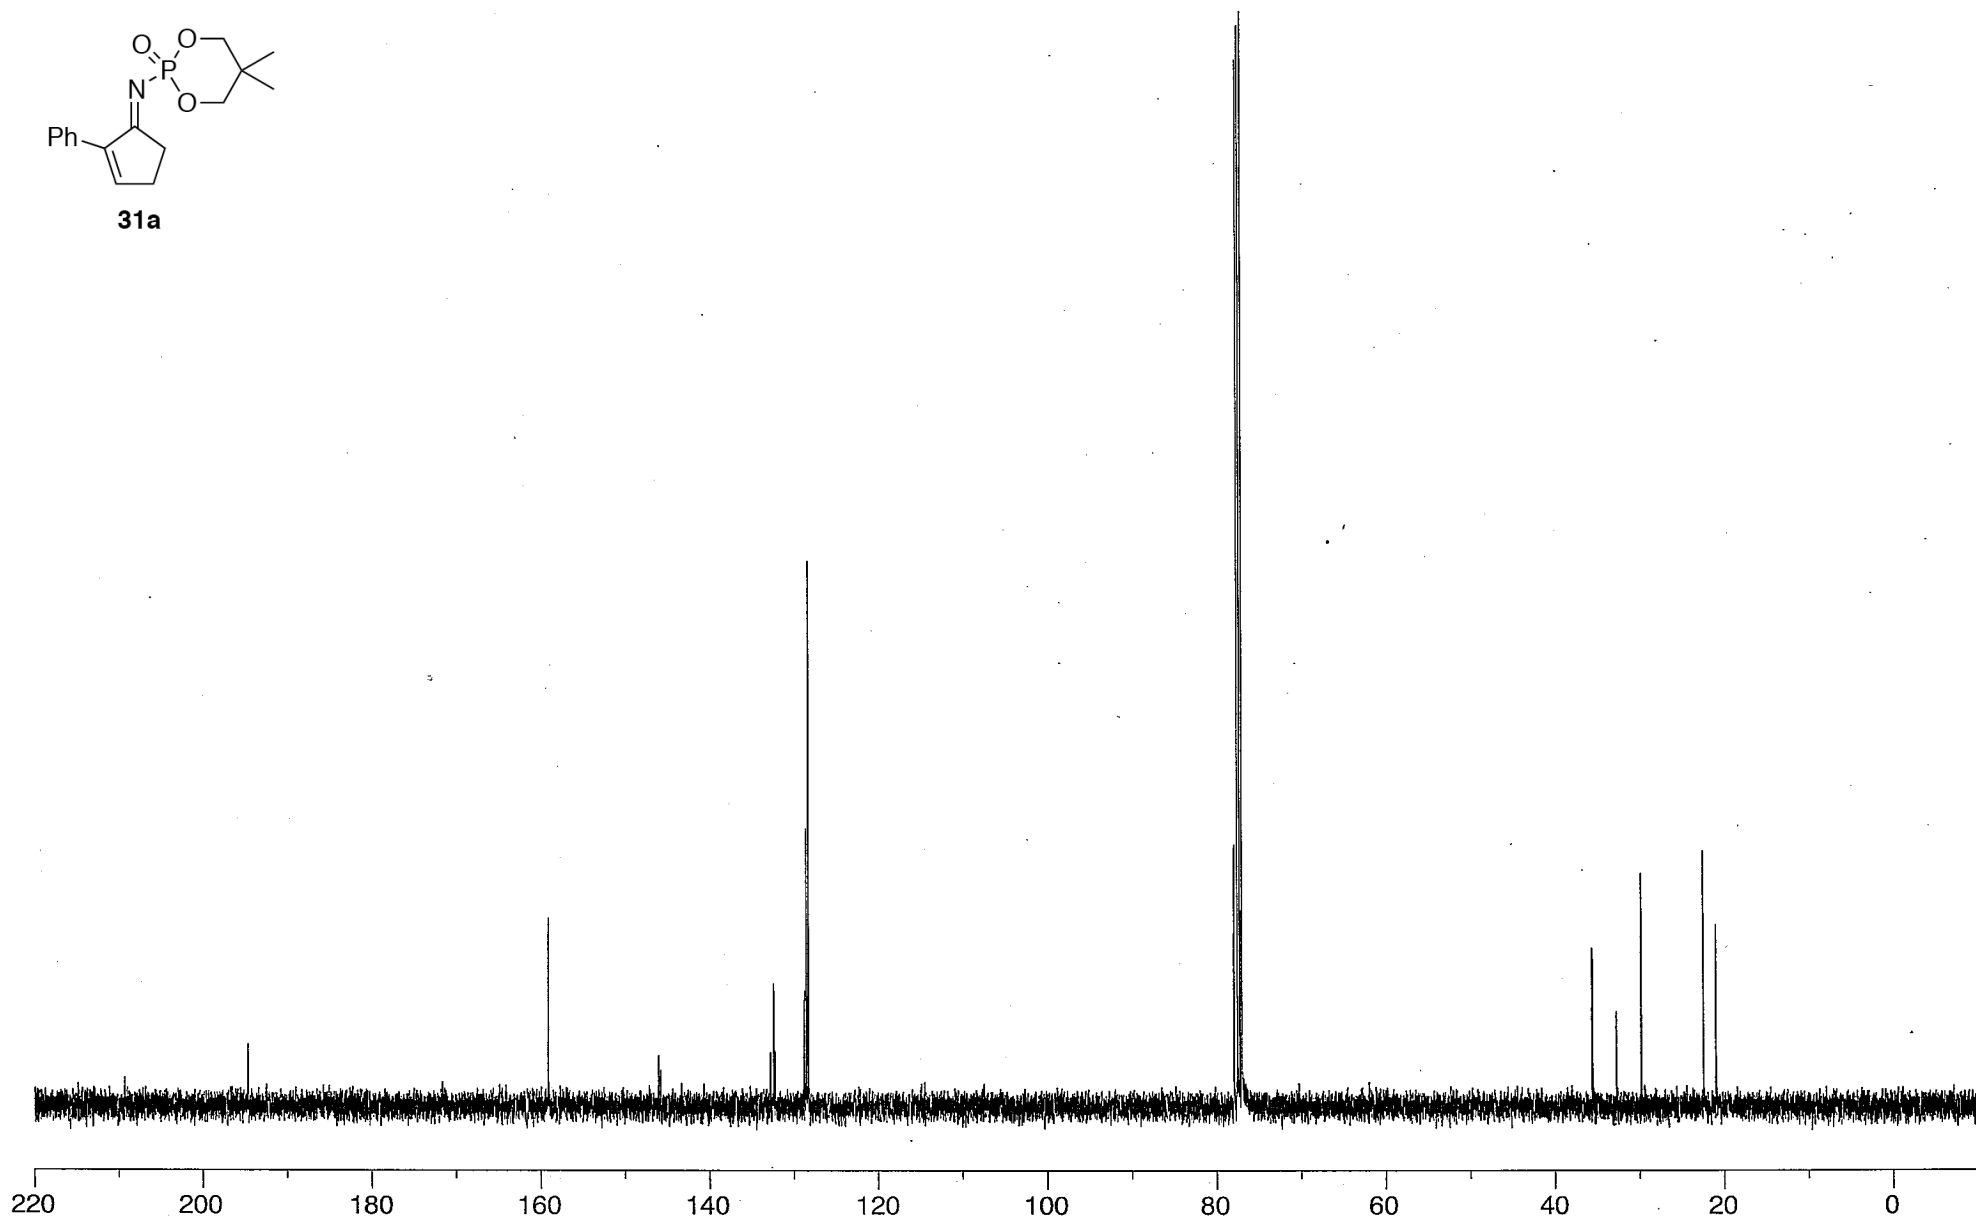

KAD-03-188P\_29Sep2011

Pulse Sequence: s2pul  
Spectrometer Freq.: 161.85 MHz  
Solvent: CDCl<sub>3</sub>

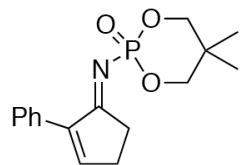

**31a**

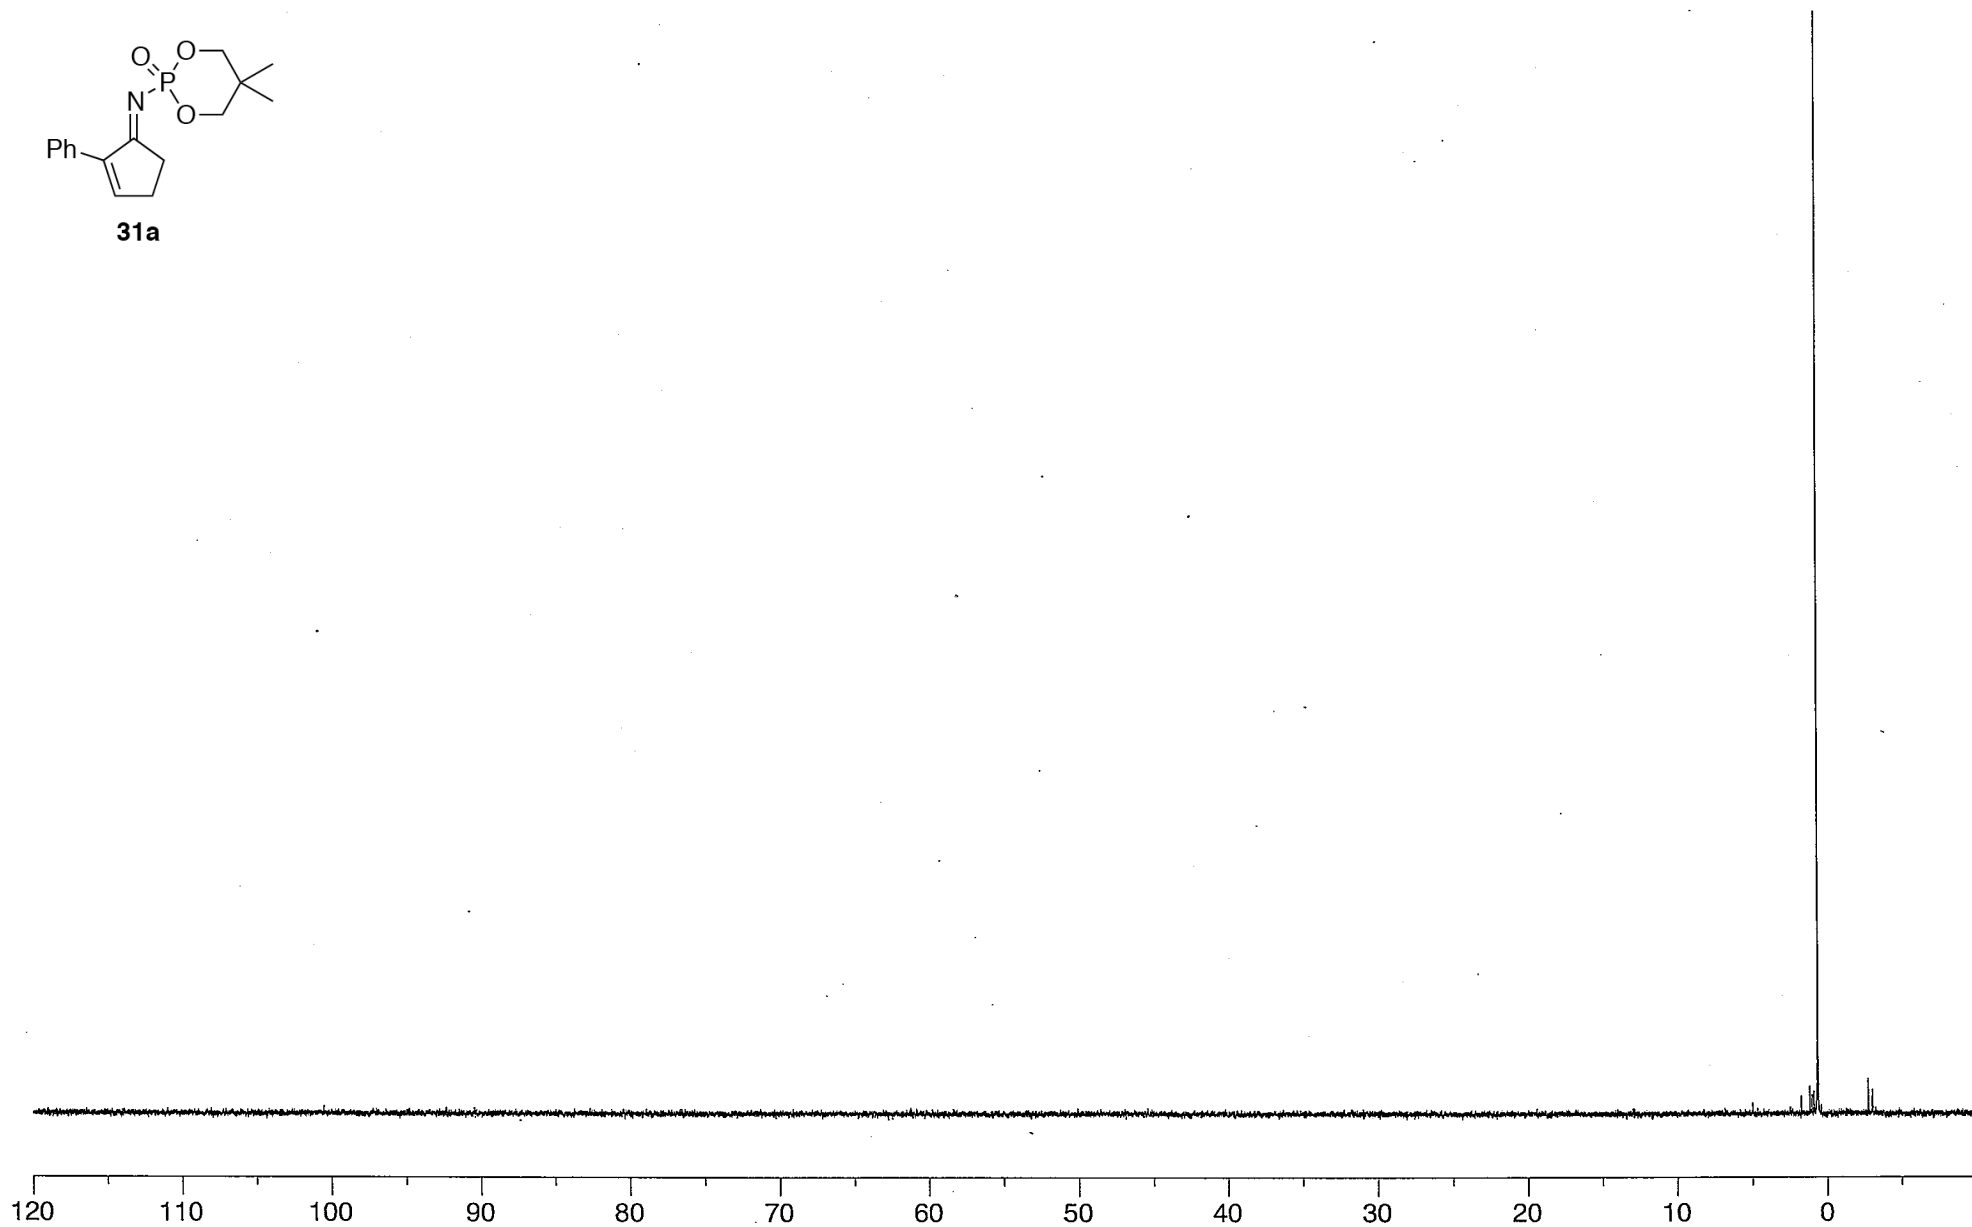



wxn27-1\_130ct2011

Archive directory: /export/home/xiaona/vnmrsys/data  
Sample directory: wxn27-1\_130ct2011

Pulse Sequence: s2pu1

Solvent: CDCl3  
Temp. 25.0 C / 298.1 K  
File: PROTON  
INOVA-500 "nmr03"

Relax. delay 1.000 sec  
Pulse 45.0 degrees  
Acq. time 3.754 sec  
Width 6387.7 Hz  
8 repetitions  
OBSERVE H1, 399.7865165 MHz  
DATA PROCESSING  
FT size 65536  
Total time 0 min, 57 sec

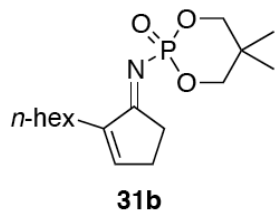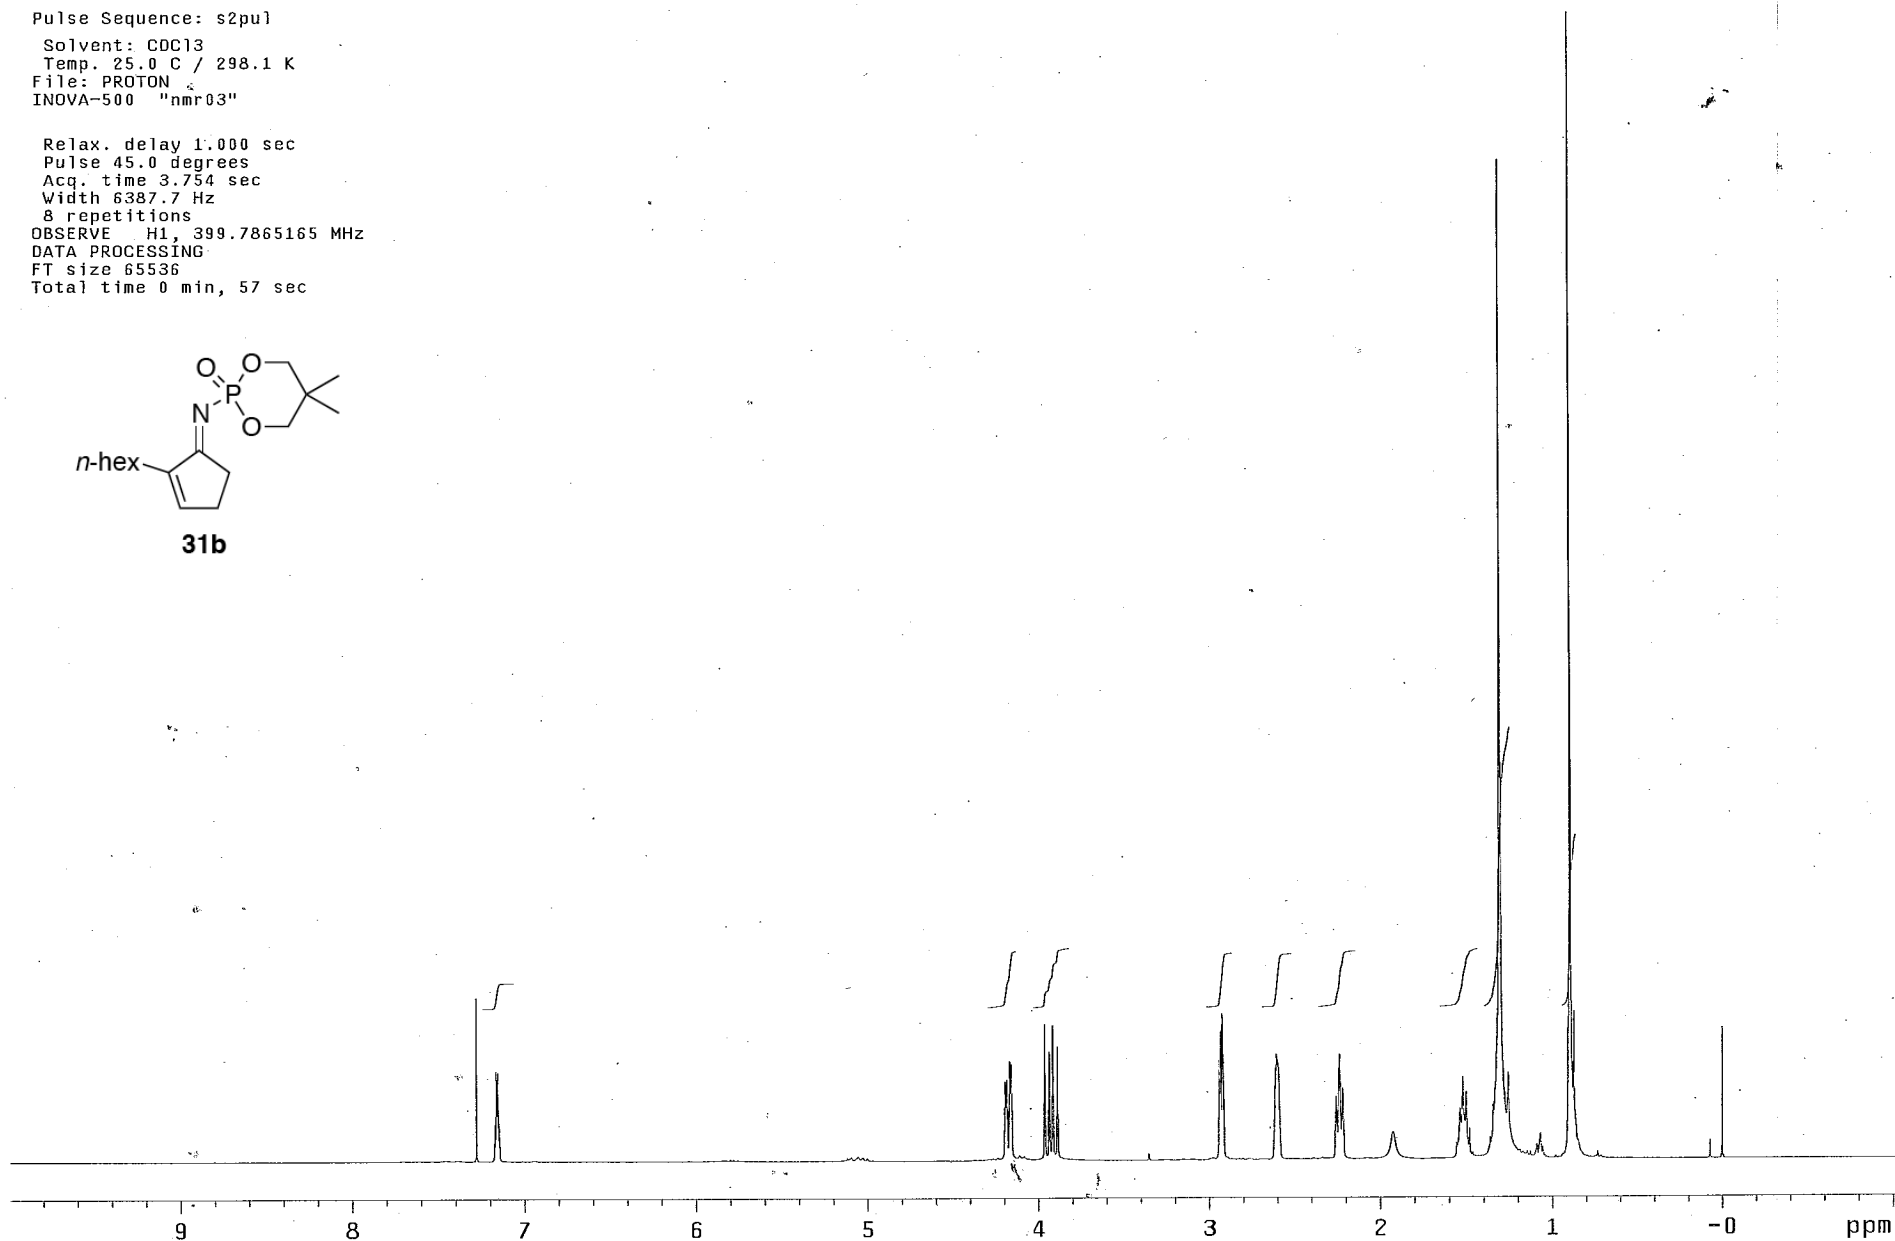

wxn27-1\_13Oct2011

Archive directory: /export/home/xiaona/vnmrsys/data  
Sample directory: wxn27-1\_13Oct2011

Pulse Sequence: s2pu1

Solvent: CDCl3  
Temp. 25.0 C / 298.1 K  
File: CARBON  
INNOVA-500 "nmr03"

Relax. delay 1.000 sec  
Pulse 45.0 degrees  
Acq. time 1.197 sec  
Width 25157.2 Hz  
744 repetitions  
OBSERVE C13, 100.5264045 MHz  
DECOUPLE H1, 399.7885243 MHz  
Power 41 dB  
continuously on  
WALTZ-16 modulated  
DATA PROCESSING  
Line broadening 0.8 Hz  
FT size 65536  
Total time 36 min, 45 sec

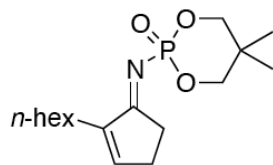

**31b**

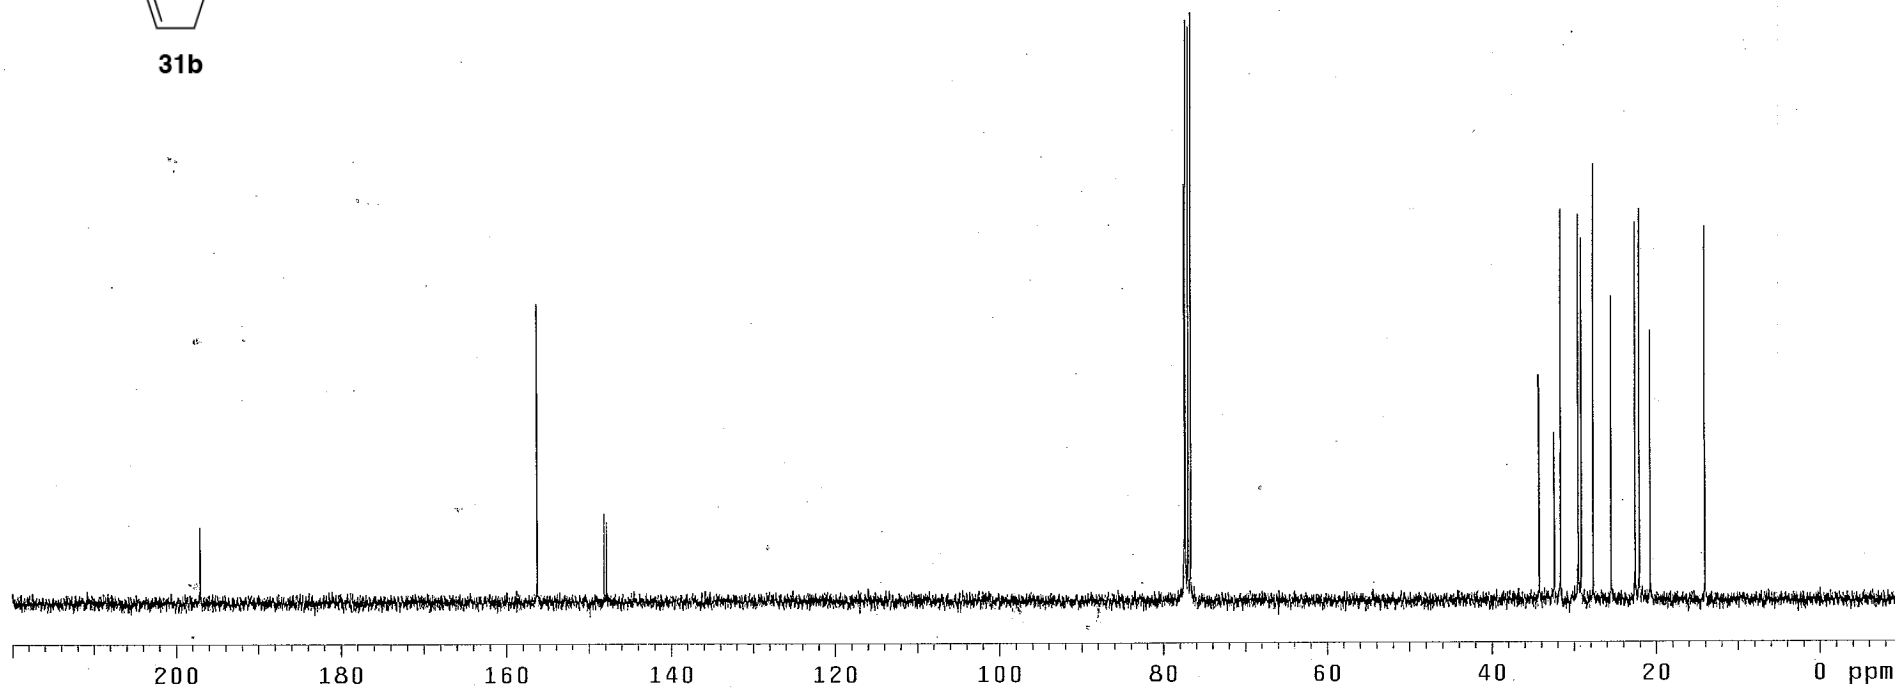

wxn27-1\_13Oct2011-11:08:24

Archive directory: /export/home/xiaona/vnmrSYS/data  
Sample directory: wxn27-1\_13Oct2011-11:08:24

Pulse Sequence: s2pu1

Solvent: CDCl3  
Temp. 25.0 C / 298.1 K  
File: PHOSPHORUS  
INOVA-500 "nmr03"

Relax. delay 1.000 sec  
Pulse 35.0 degrees  
Acq. time 0.800 sec  
Width 35650.6 Hz  
64 repetitions  
OBSERVE P31, 161.8363711 MHz  
DECOUPLE H1, 399.7885243 MHz  
Power 41 dB  
continuously on  
WALTZ-16 modulated  
DATA PROCESSING  
Line broadening 1.0 Hz  
FT size 65536  
Total time 2 min, 3 sec

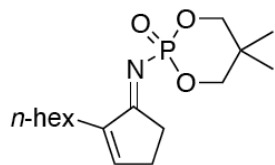

**31b**

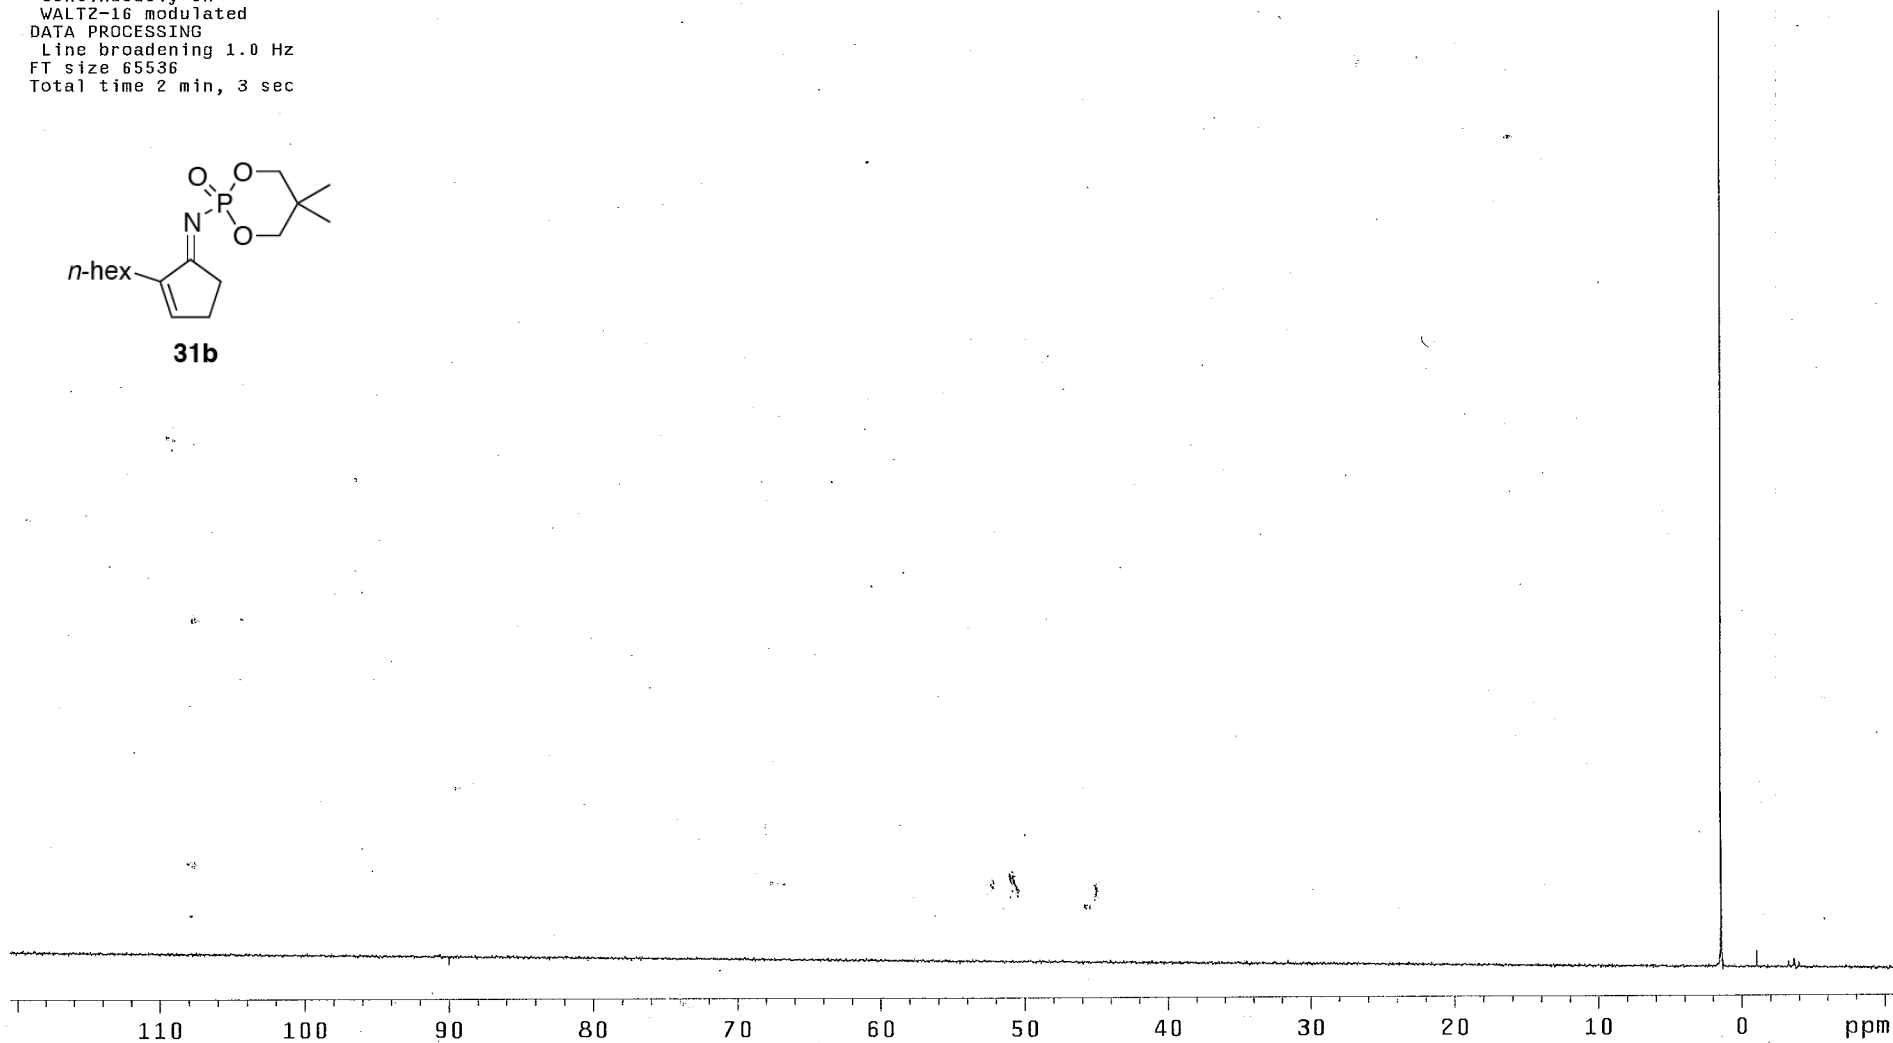

wxn60-2\_09Nov2011-18:51:57

Archive directory: /export/home/xiaona/vnmrSYS/data  
Sample directory: wxn60-2\_09Nov2011-18:51:57

Pulse Sequence: s2pul

Solvent: CDCl3  
Temp. 25.0 C / 298.1 K  
File: PROTON  
INOVA-500 "nmr03"

Relax. delay 1.000 sec  
Pulse 45.0 degrees  
Acq. time 3.754 sec  
Width 6387.7 Hz  
8 repetitions  
OBSERVE H1, 399.7865399 MHz  
DATA PROCESSING  
FT size 65536  
Total time 0 min, 57 sec

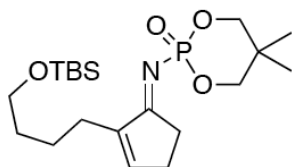

**31c**

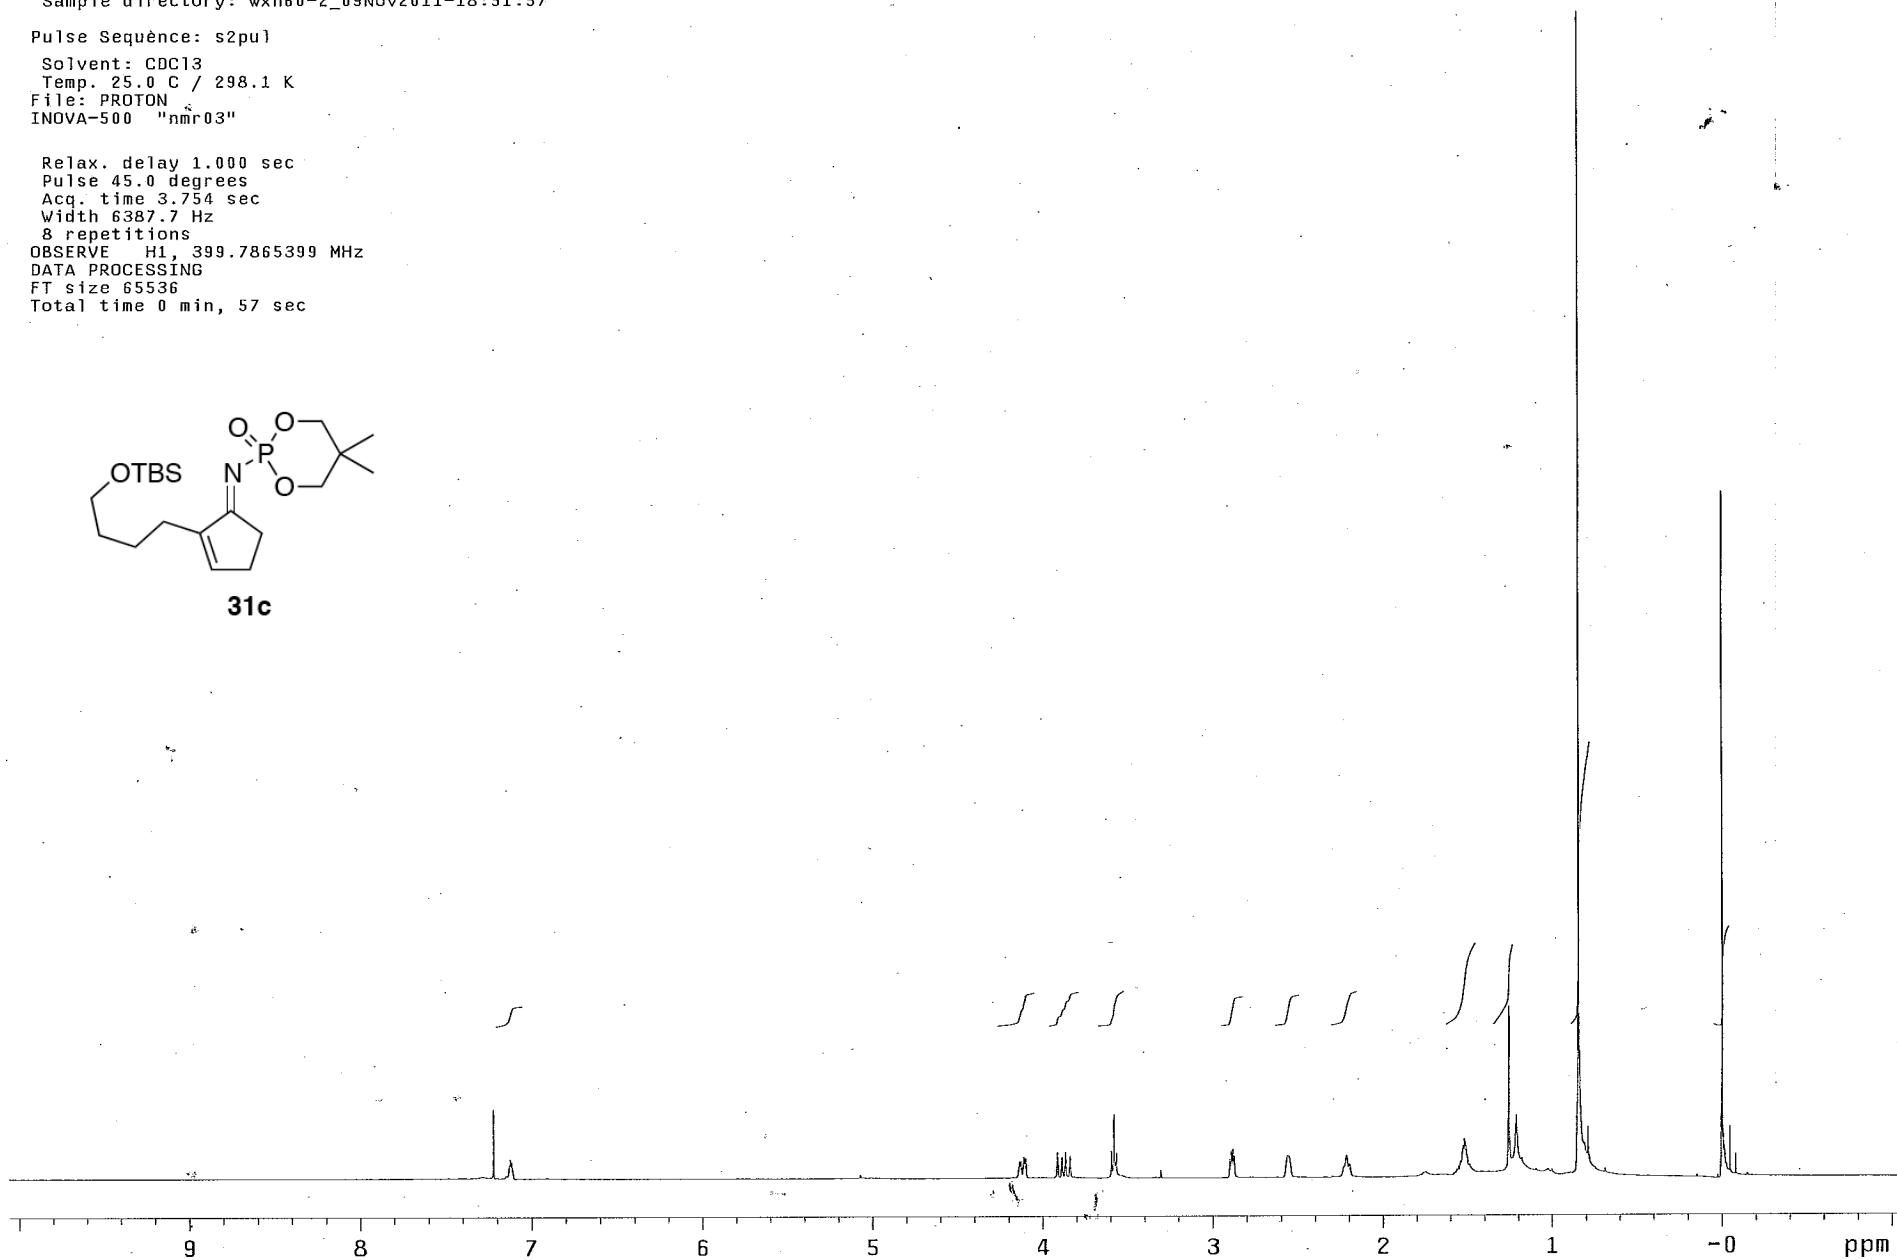

wxn60-2\_09Nov2011-20:55:14

Archive directory: /export/home/xiaona/vnmrsys/data  
Sample directory: wxn60-2\_09Nov2011-20:55:14

Pulse Sequence: s2pu1

Solvent: CDCl3  
Temp. 25.0 C / 298.1 K  
File: CARBON  
INOVA-500 "nmr03"

Relax. delay 1.000 sec  
Pulse 45.0 degrees  
Acq. time 1.197 sec  
Width 25157.2 Hz  
1778 repetitions  
OBSERVE C13, 100.5264030 MHz  
DECOUPLE H1, 399.7885243 MHz  
Power 41 dB  
continuously on  
WALTZ-16 modulated  
DATA PROCESSING  
Line broadening 0.8 Hz  
FT size 65536  
Total time 3 hr, 3 min, 49 sec

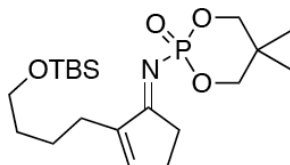

31c

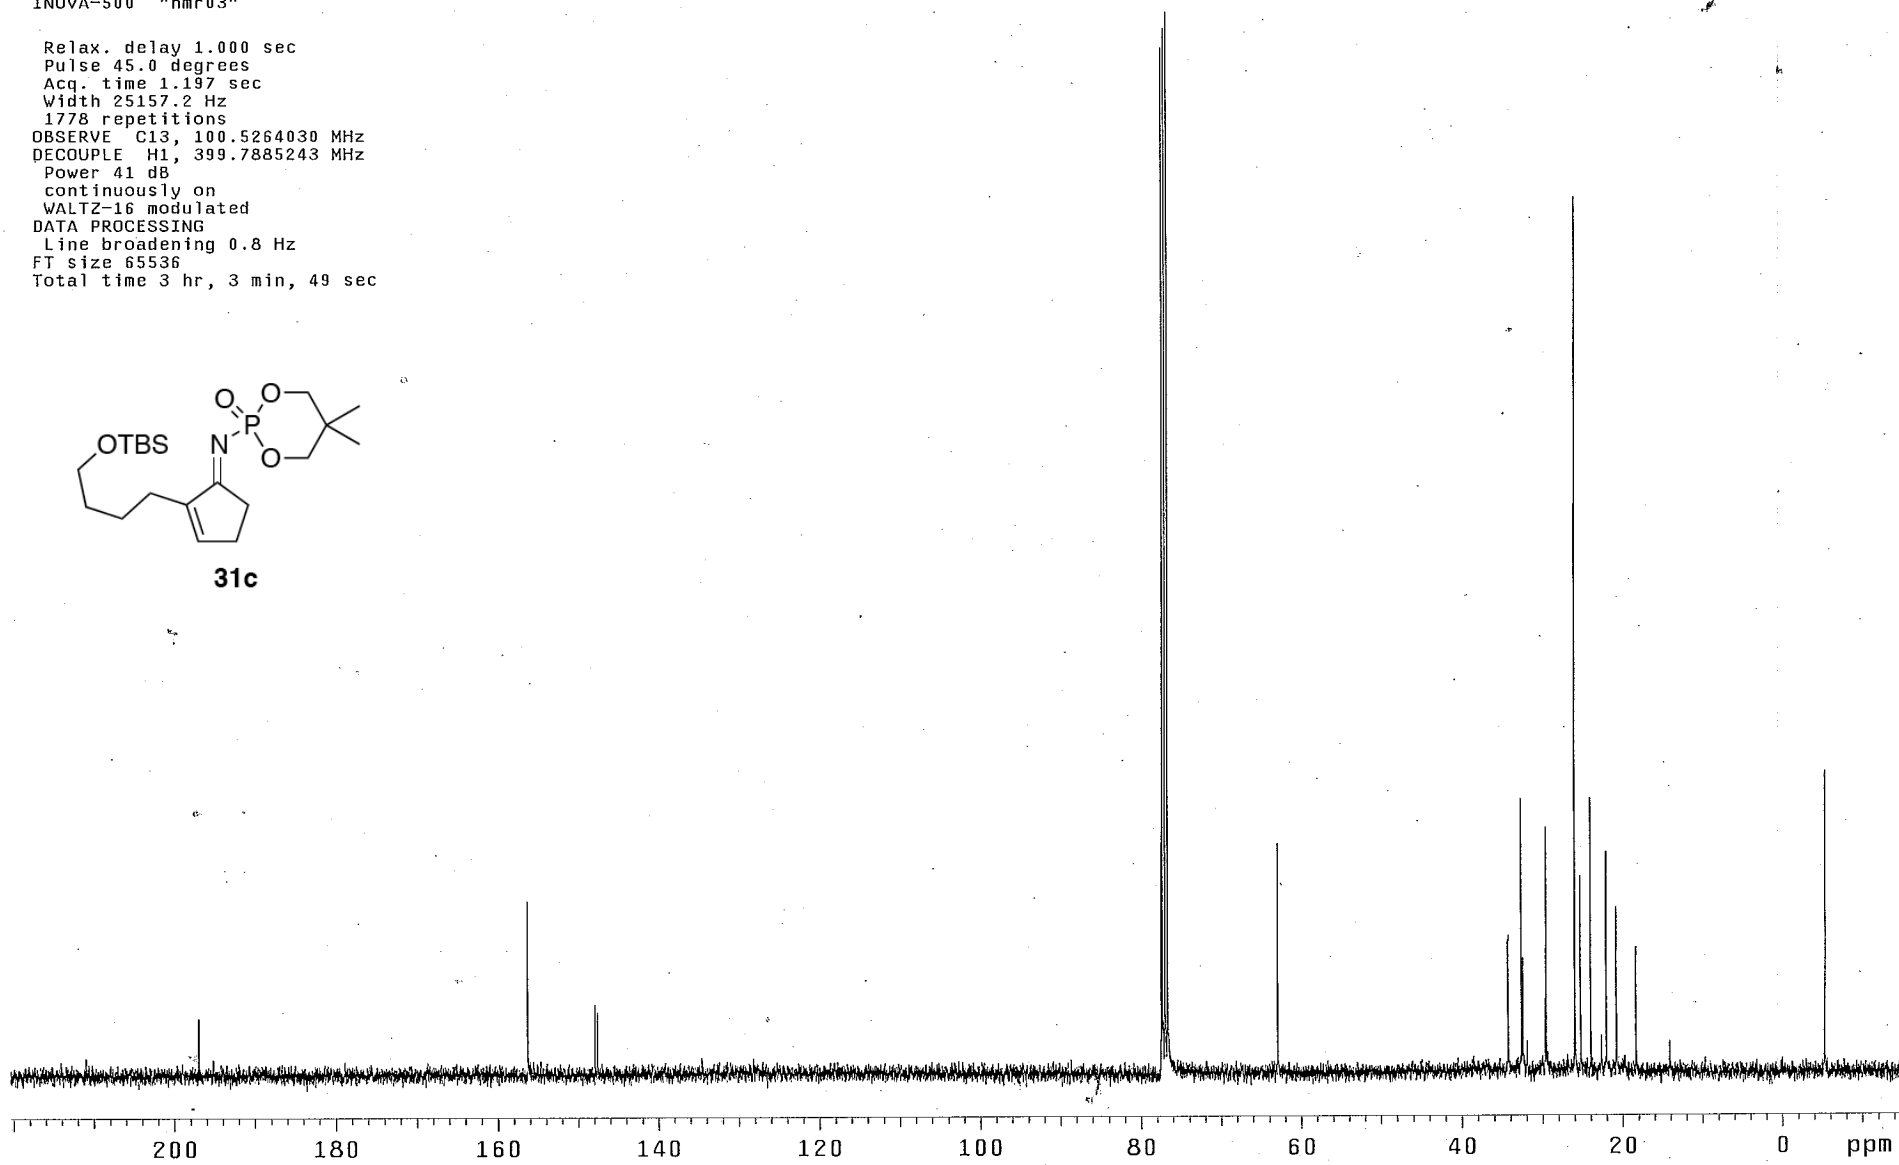

wxn60-2\_09Nov2011

Archive directory: /export/home/xiaona/vnmrSYS/data  
Sample directory: wxn60-2\_09Nov2011

Pulse Sequence: s2pu1

Solvent: CDCl3  
Temp. 25.0 C / 298.1 K  
File: PHOSPHORUS  
INOVA-500 "nmr03"

Relax. delay 1.000 sec  
Pulse 35.0 degrees  
Acq. time 0.799 sec  
Width 35650.6 Hz  
64 repetitions  
OBSERVE P31, 161.8363711 MHz  
DECOUPLE H1, 399.7885243 MHz  
Power 41 dB  
on during acquisition  
off during delay  
WALTZ-16 modulated  
DATA PROCESSING  
Line broadening 1.0 Hz  
FT size 65536  
Total time 2 min, 2 sec

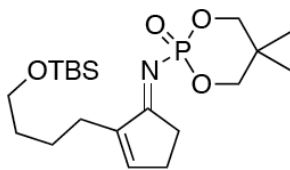

31c

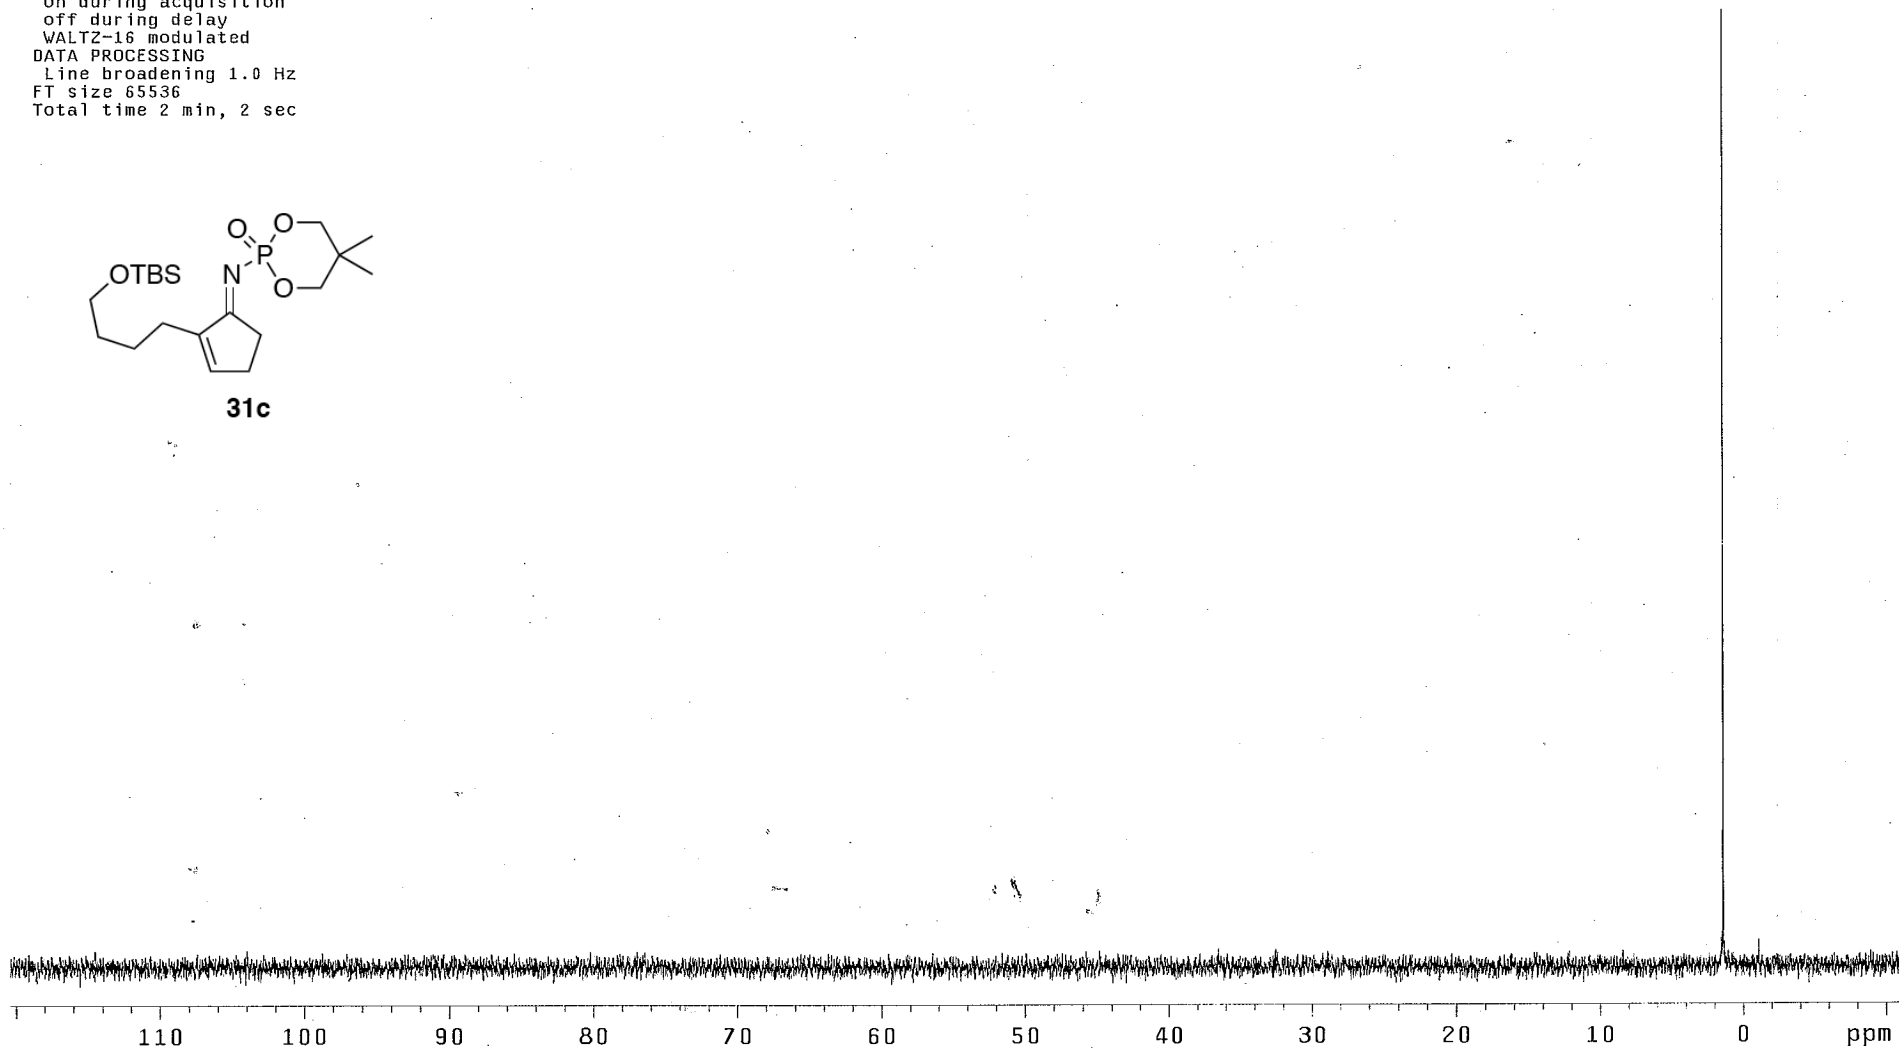

Pulse Sequence: s2pul  
Spectrometer Freq.: 399.79 MHz  
Solvent: CDCl<sub>3</sub>

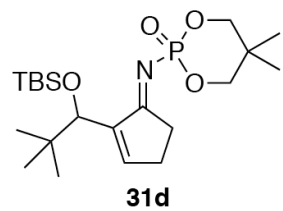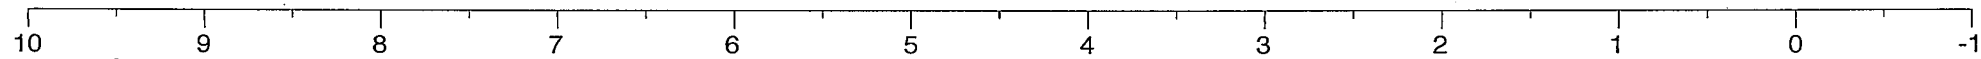





KAD-03-256\_24Jan2012

Pulse Sequence: s2pu1  
Spectrometer Freq.: 161.85 MHz  
Solvent: CDCl<sub>3</sub>

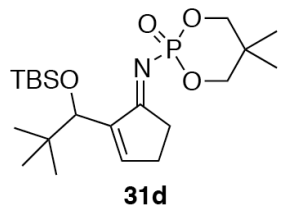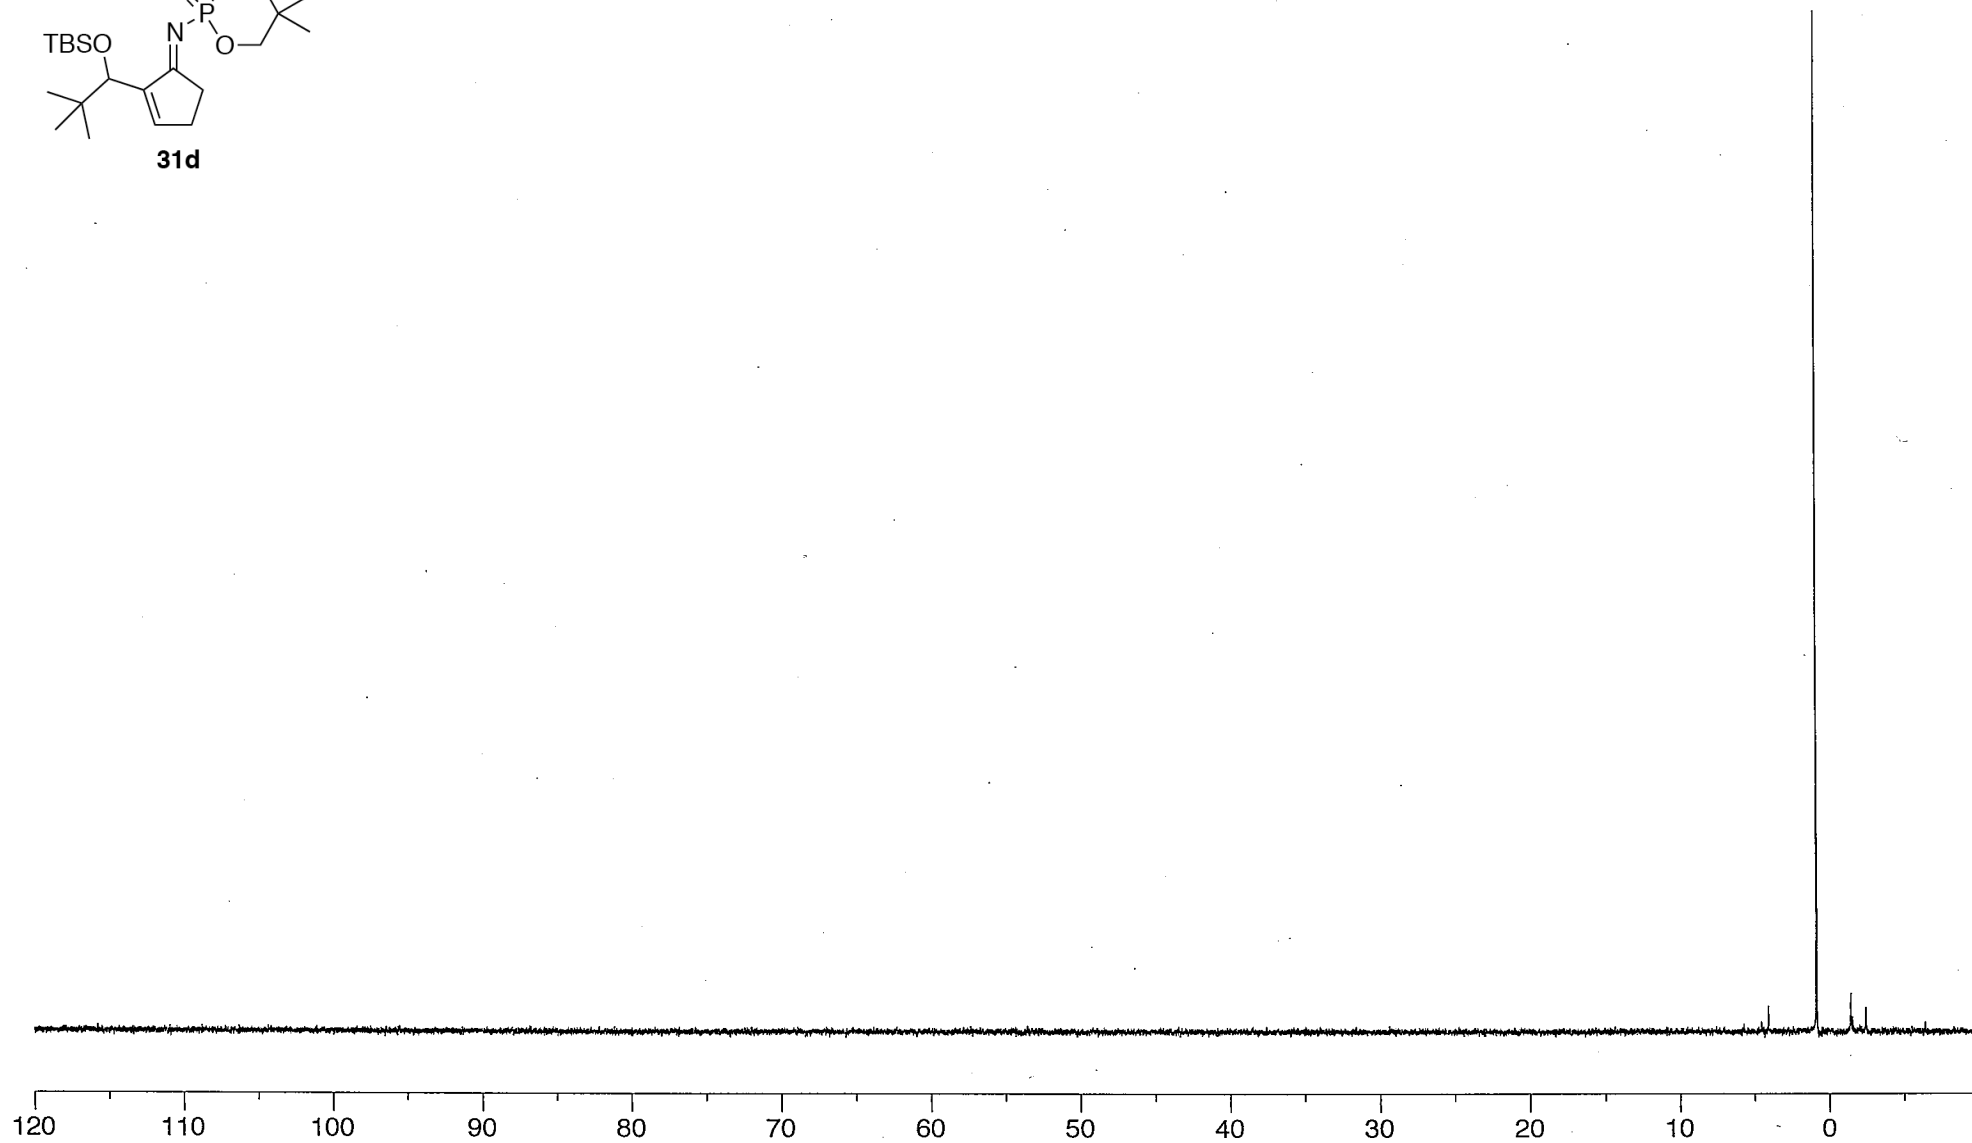

wxn80-a-1\_07Dec2011

Archive directory: /export/home/xiaona/vnmrsys/data  
Sample directory: wxn80-a-1\_07Dec2011

Pulse Sequence: s2pu1

Solvent: CDCl3  
Temp. 25.0 C / 298.1 K  
File: PROTON  
INOVA-500 "nmr03"

Relax. delay 1.000 sec  
Pulse 45.0 degrees  
Acq. time 3.754 sec  
Width 6387.7 Hz  
8 repetitions  
OBSERVE H1, 399.7865241 MHz  
DATA PROCESSING  
FT size 65536  
Total time 0 min, 57 sec

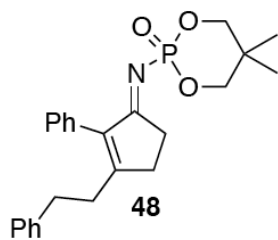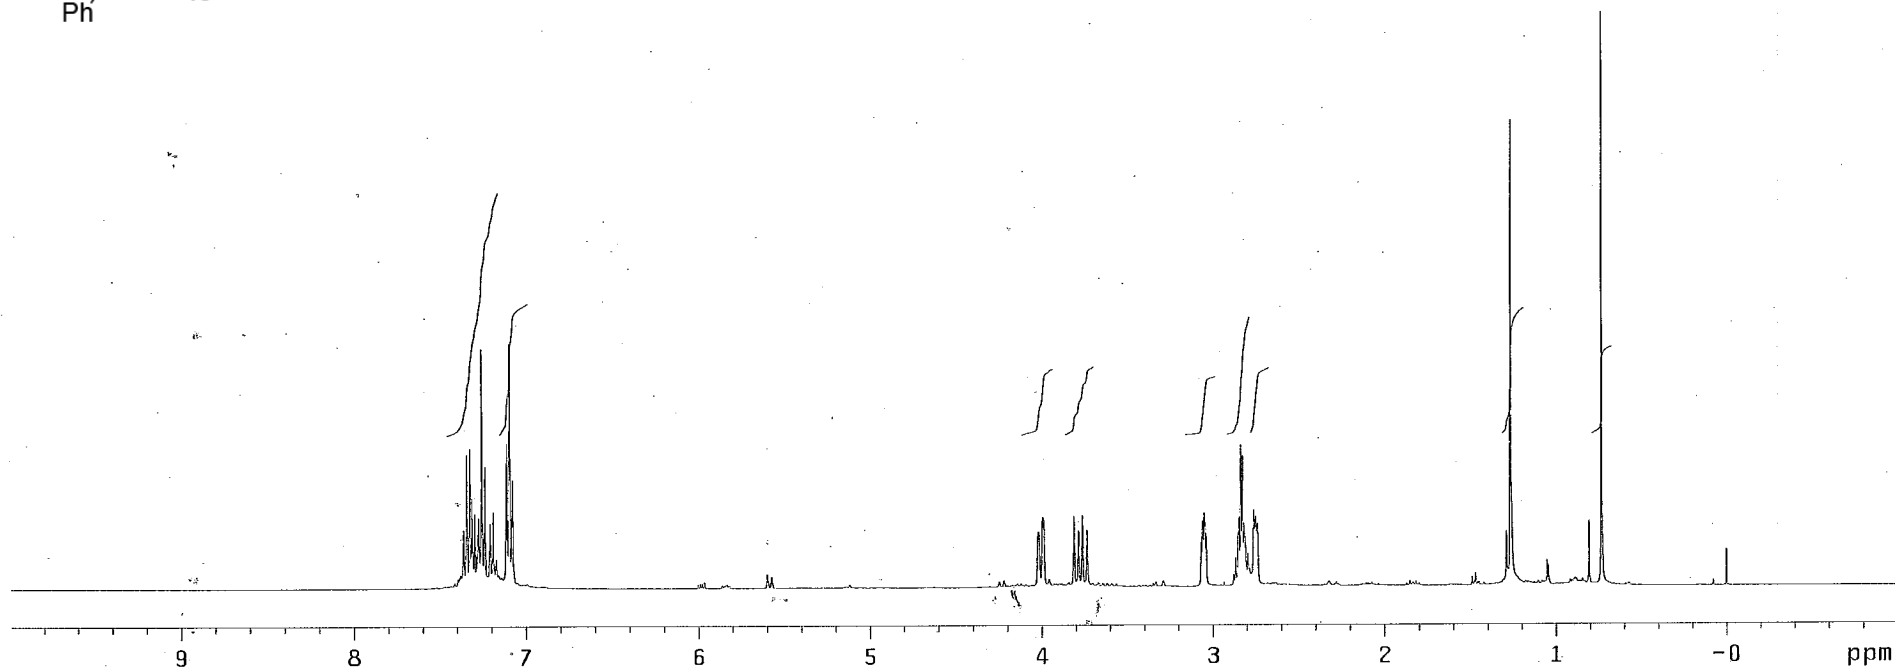

wxn80-a-1\_07Dec2011

Archive directory: /export/home/xiaona/vnmrsys/data  
Sample directory: wxn80-a-1\_07Dec2011

Pulse Sequence: s2pu1

Solvent: CDCl3  
Temp. 25.0 C / 298.1 K  
File: CARBON  
INOVA-500 "nmr03"

Relax. delay 1.000 sec  
Pulse 45.0 degrees  
Acq. time 1.197 sec  
Width 25157.2 Hz  
599 repetitions  
OBSERVE C13, 100.5264099 MHz  
DECOUPLE H1, 399.7885243 MHz  
Power 41 dB  
continuously on  
WALTZ-16 modulated  
DATA PROCESSING  
Line broadening 0.8 Hz  
FT size 65536  
Total time 36 min, 45 sec

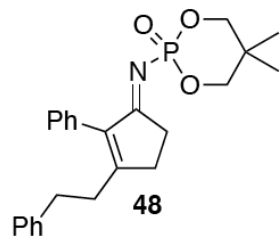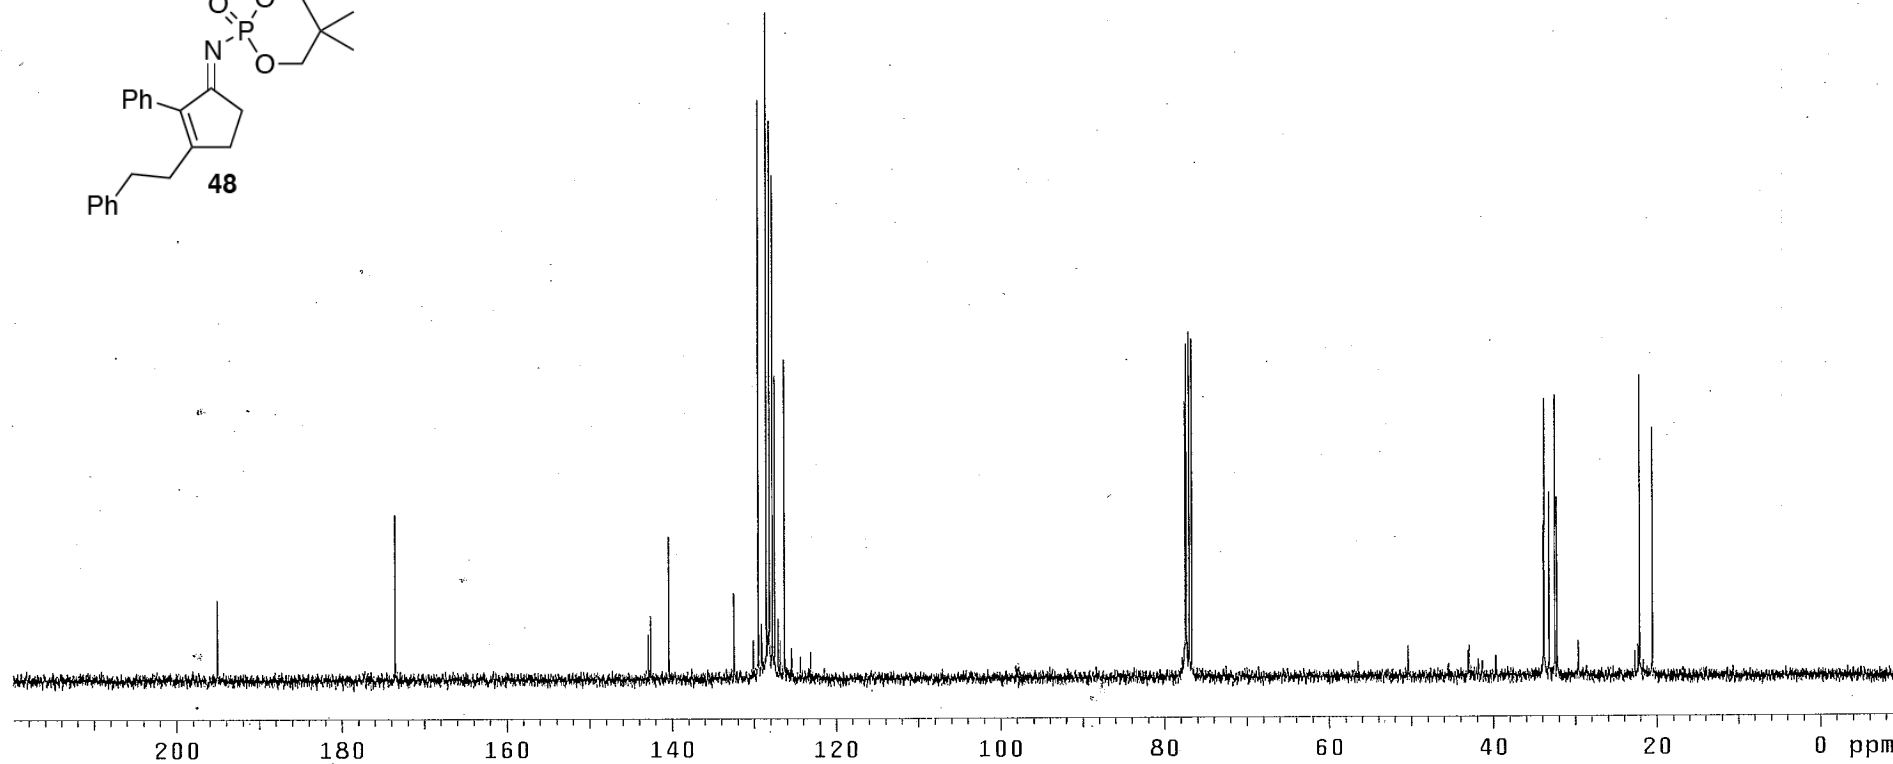

wxn80-a-1\_07Dec2011

Archive directory: /export/home/xiaona/vnmrsys/data  
Sample directory: wxn80-a-1\_07Dec2011

Pulse Sequence: s2pu1

Solvent: CDCl3  
Temp. 25.0 C / 298.1 K  
File: PHOSPHORUS  
INNOVA-500 "nmr03"

Relax. delay 1.000 sec  
Pulse 35.0 degrees  
Acq. time 0.799 sec  
Width 35650.6 Hz  
64 repetitions  
OBSERVE P31, 161.8363711 MHz  
DECOUPLE H1, 399.7885243 MHz  
Power 41 dB  
on during acquisition  
off during delay  
WALTZ-16 modulated  
DATA PROCESSING  
Line broadening 1.0 Hz  
FT size 65536  
Total time 2 min, 2 sec

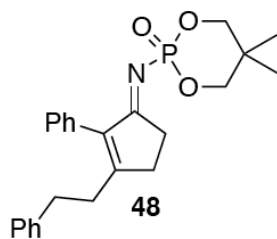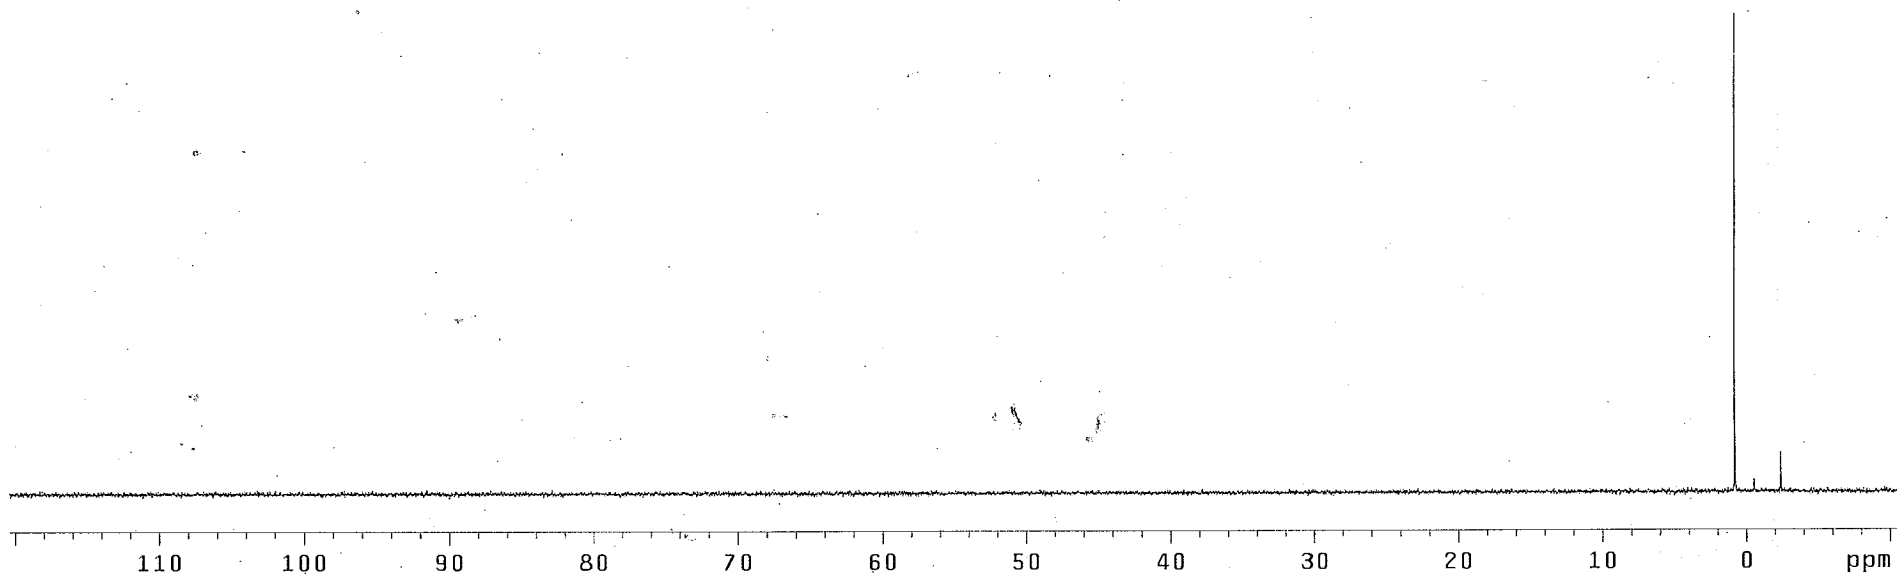

Pulse Sequence: s2pul  
Spectrometer Freq.: 399.79 MHz  
Solvent: CDCl<sub>3</sub>

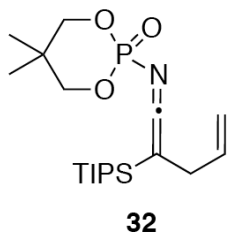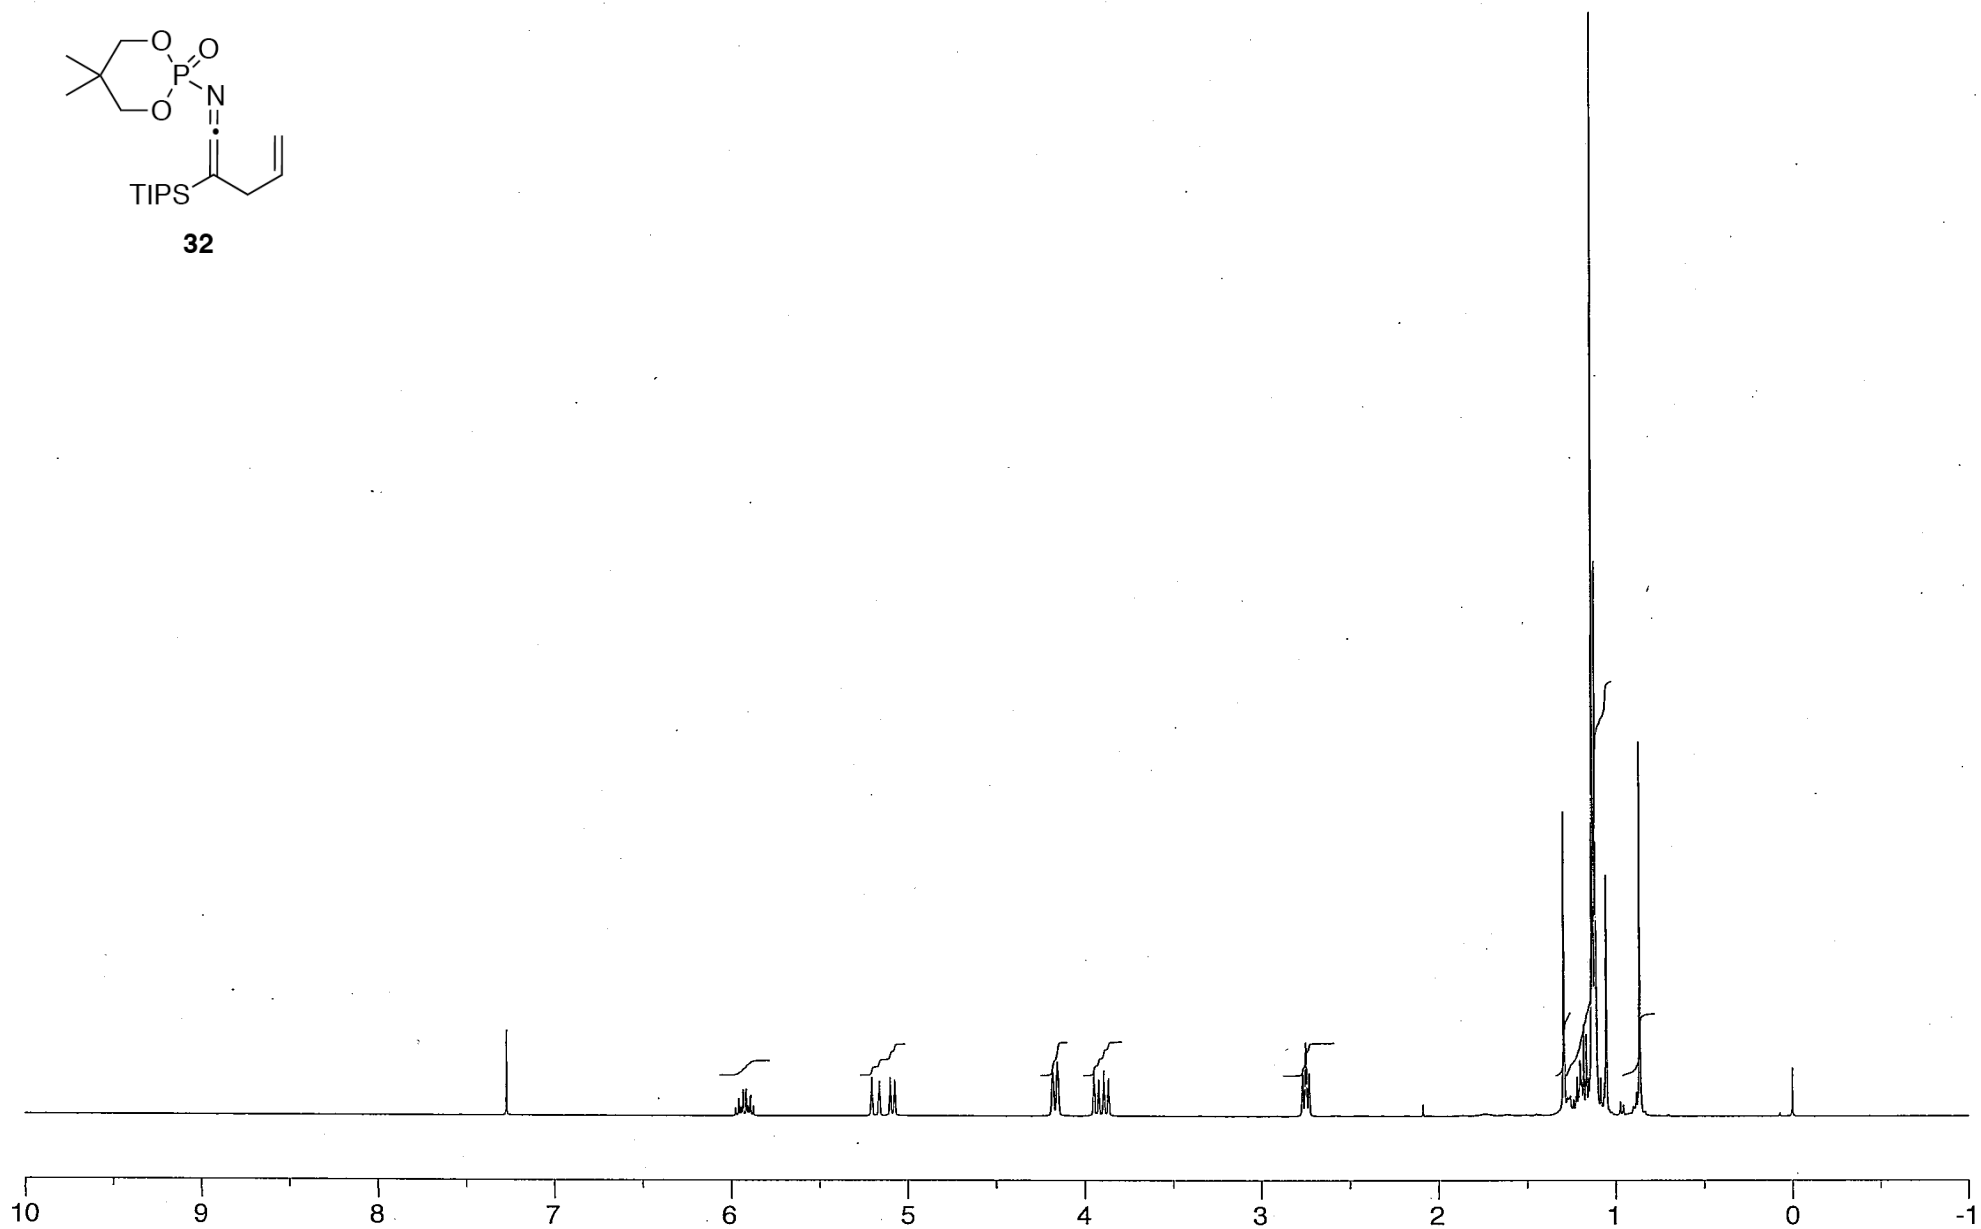

MW-1-137\_01Nov2011

Pulse Sequence: s2pu1  
Spectrometer Freq.: 100.54 MHz  
Solvent: CDCl<sub>3</sub>

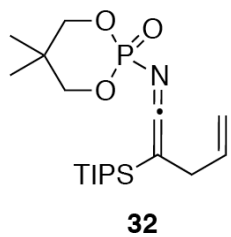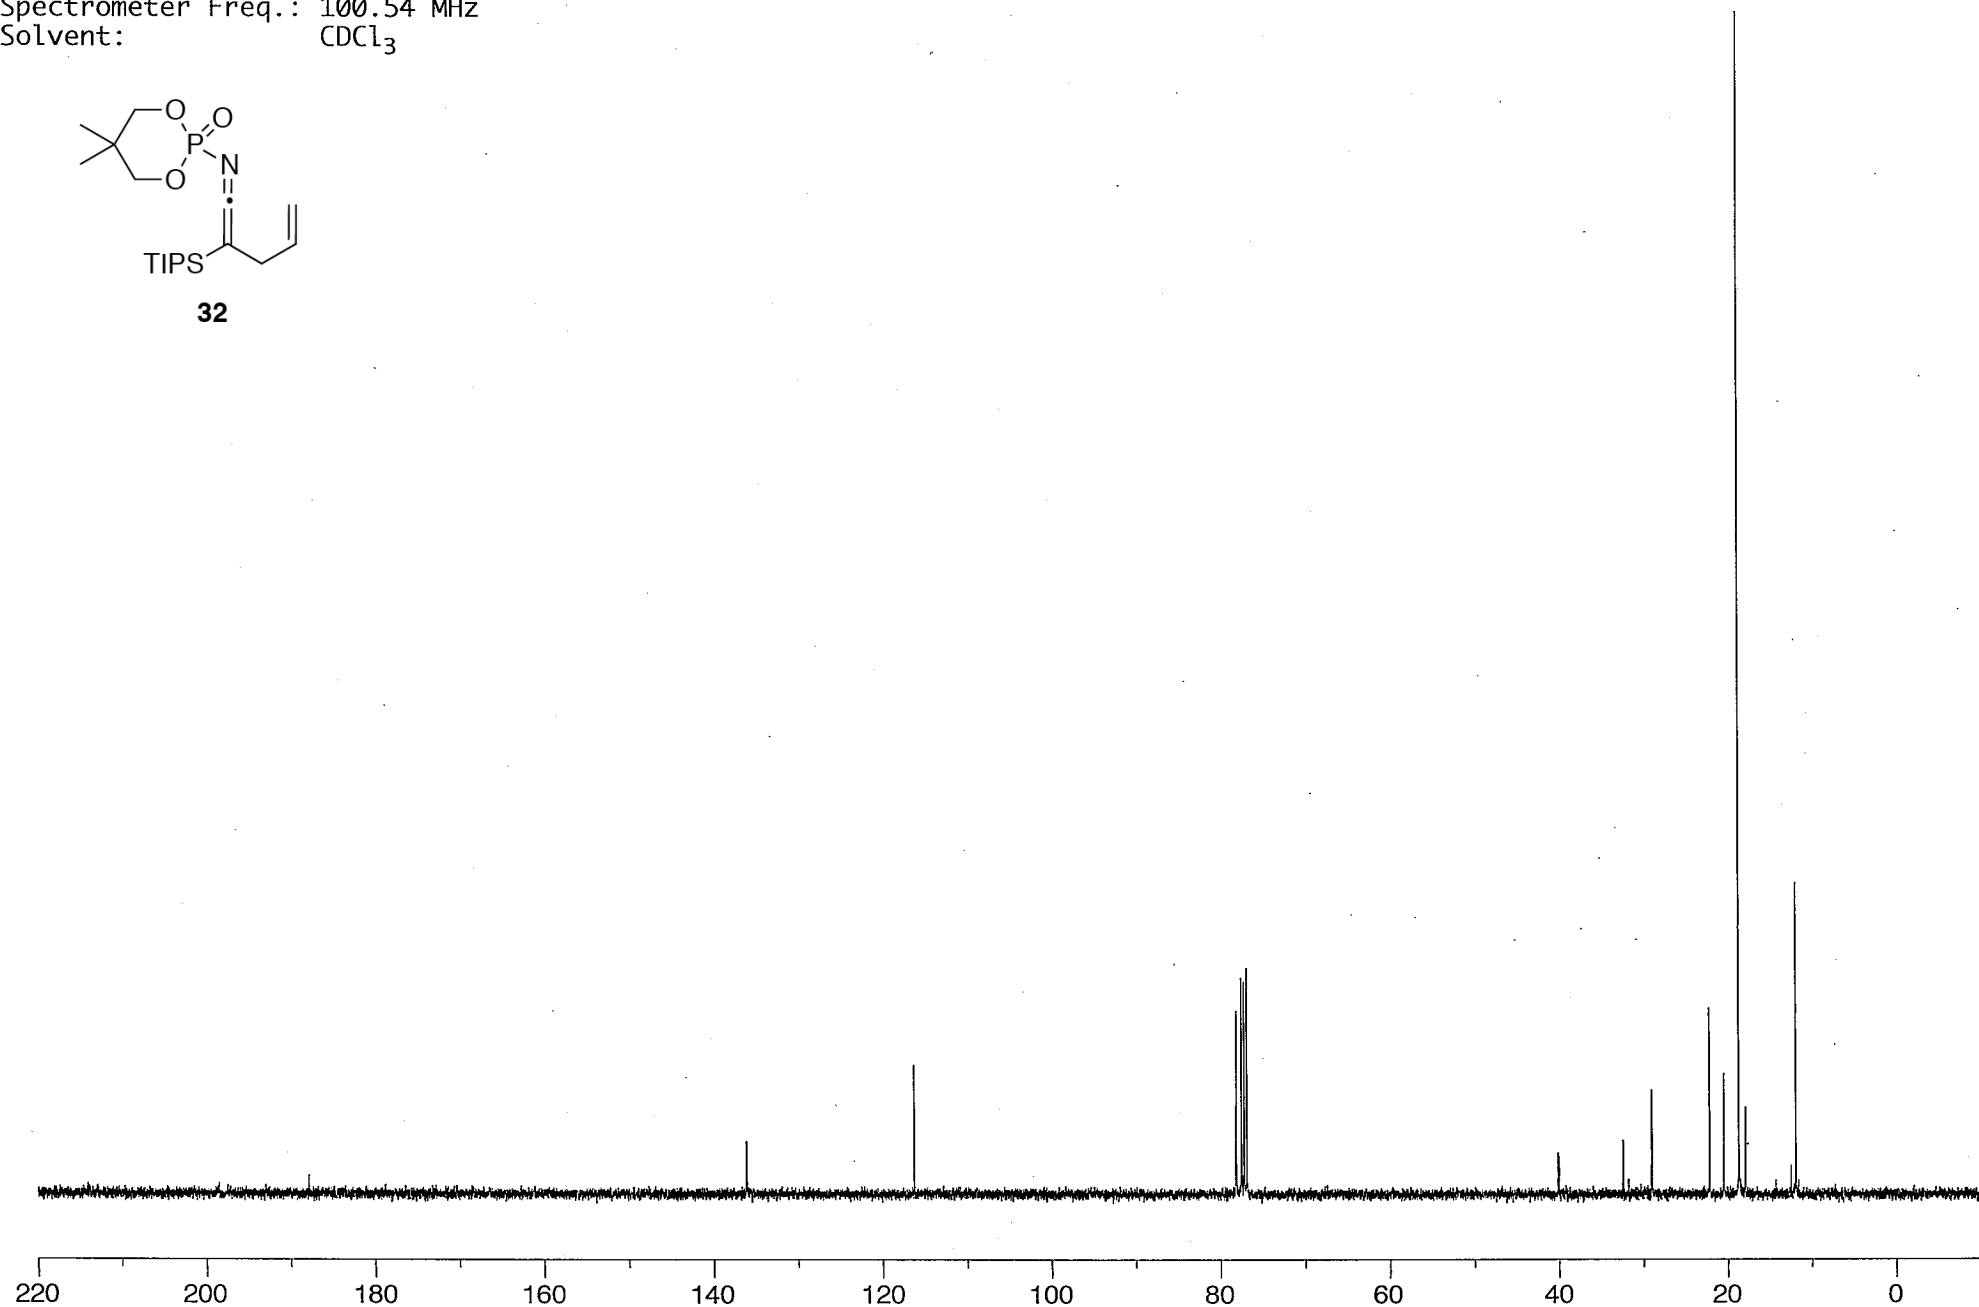

MW-1-137\_01Nov2011

Pulse Sequence: s2pul  
Spectrometer Freq.: 161.85 MHz  
Solvent: CDCl<sub>3</sub>

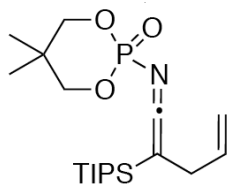

**32**

100 90 80 70 60 50 40 30 20 10 0 -10

KAD-03-229\_22Dec2011

Pulse Sequence: s2pul  
Spectrometer Freq.: 399.79 MHz  
Solvent: CDCl<sub>3</sub>

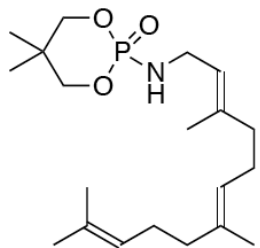

56

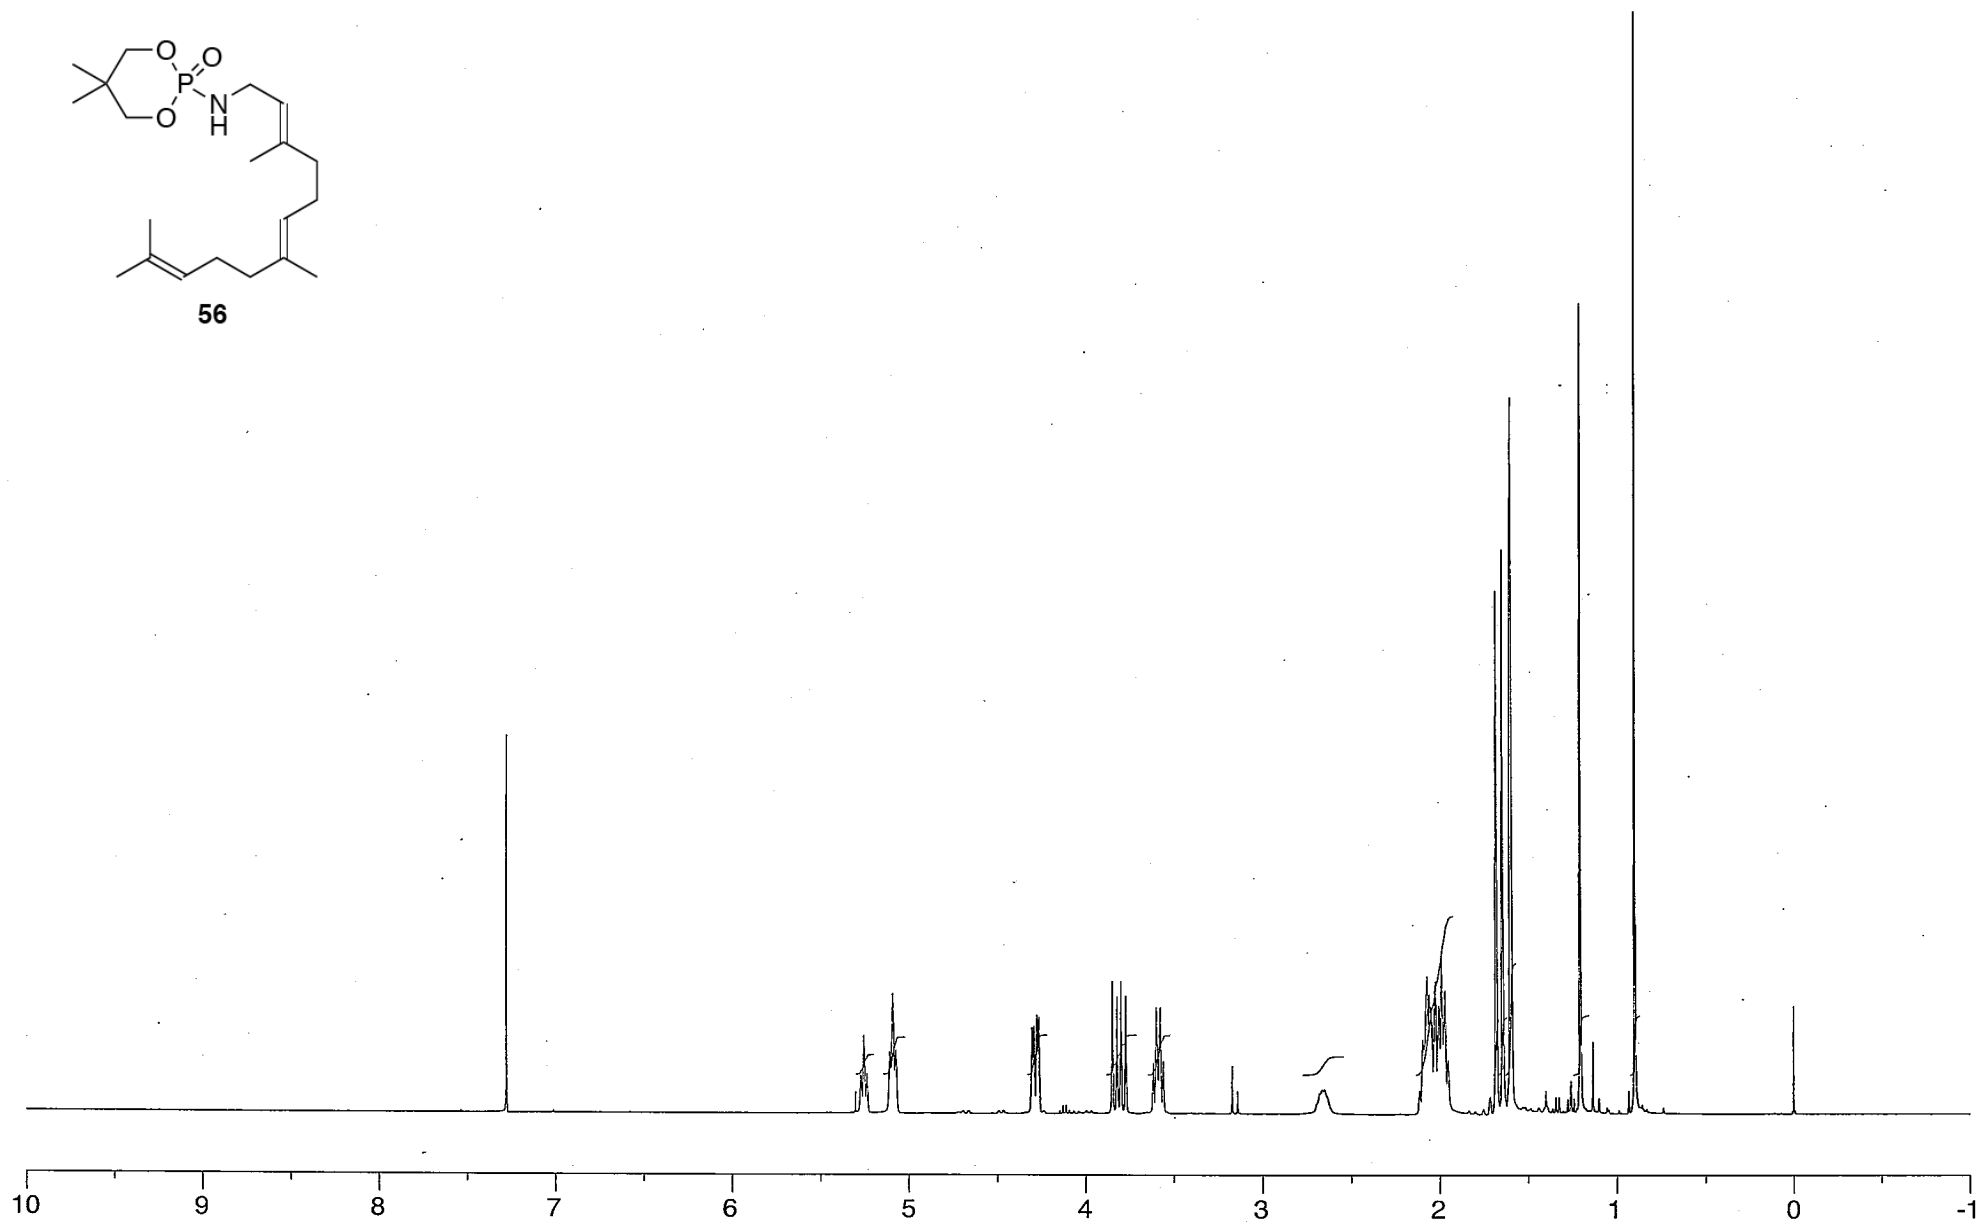





KAD-03-229PC\_22Dec2011

Pulse Sequence: s2pu1  
Spectrometer Freq.: 161.85 MHz  
Solvent: CDCl<sub>3</sub>

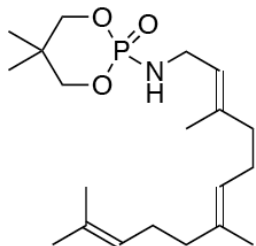

56

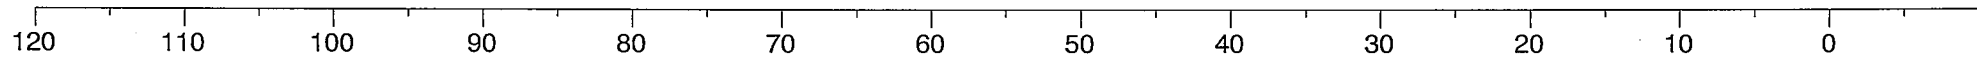

Pulse Sequence: s2pul  
Spectrometer Freq.: 399.79 MHz  
Solvent: CDCl<sub>3</sub>

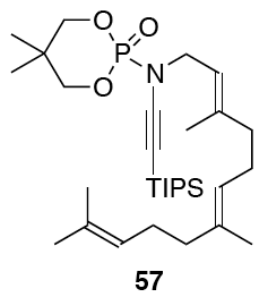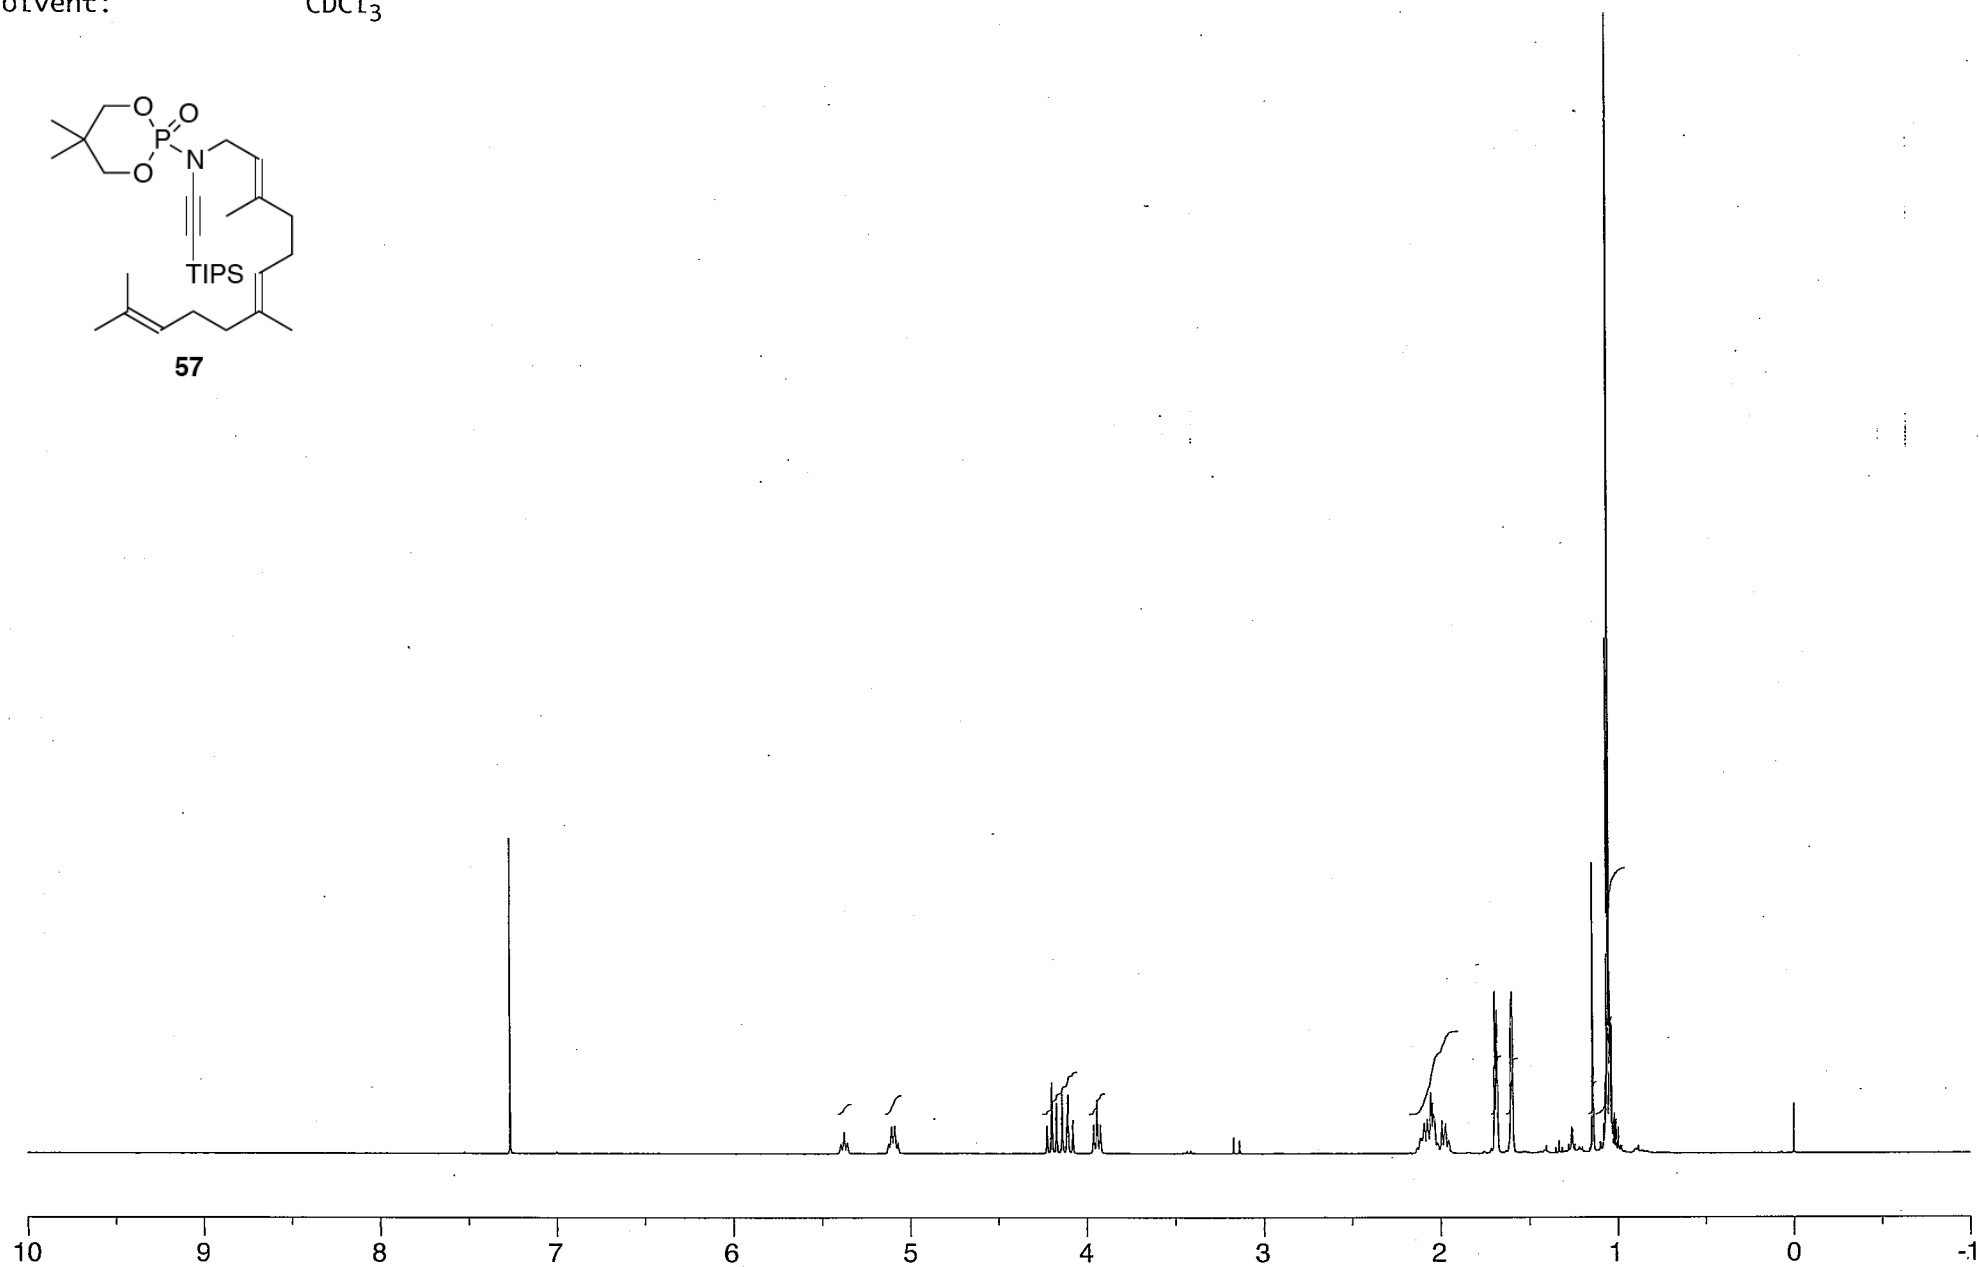

KAD-03-230\_31Dec2011

Pulse Sequence: s2pu1  
Spectrometer Freq.: 100.54 MHz  
Solvent: CDCl<sub>3</sub>

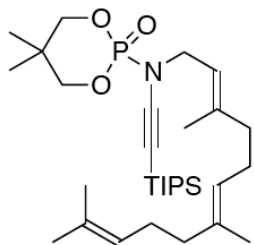

57

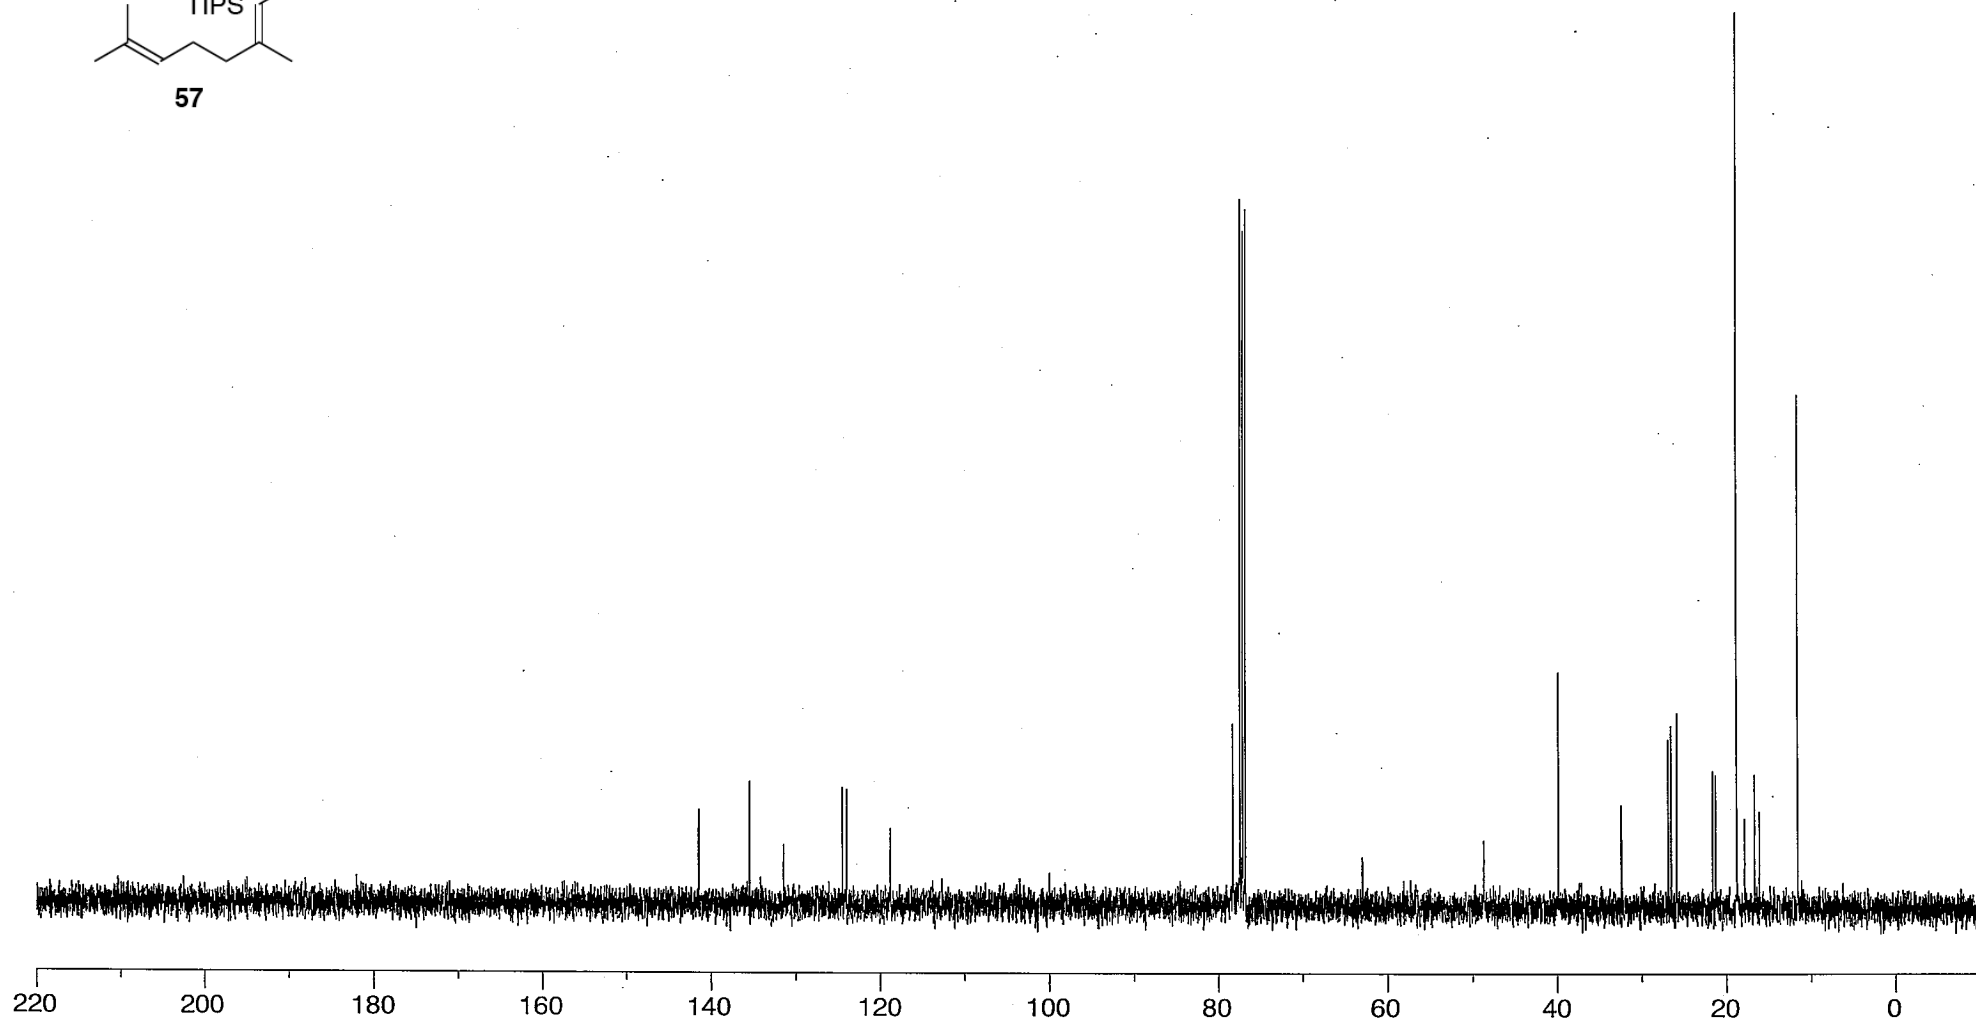

KAD-03-230\_31Dec2011

Pulse Sequence: s2pul  
Spectrometer Freq.: 161.85 MHz  
Solvent: CDCl<sub>3</sub>

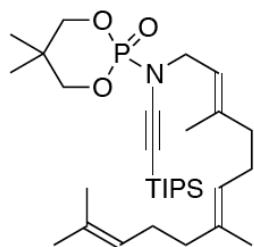

57

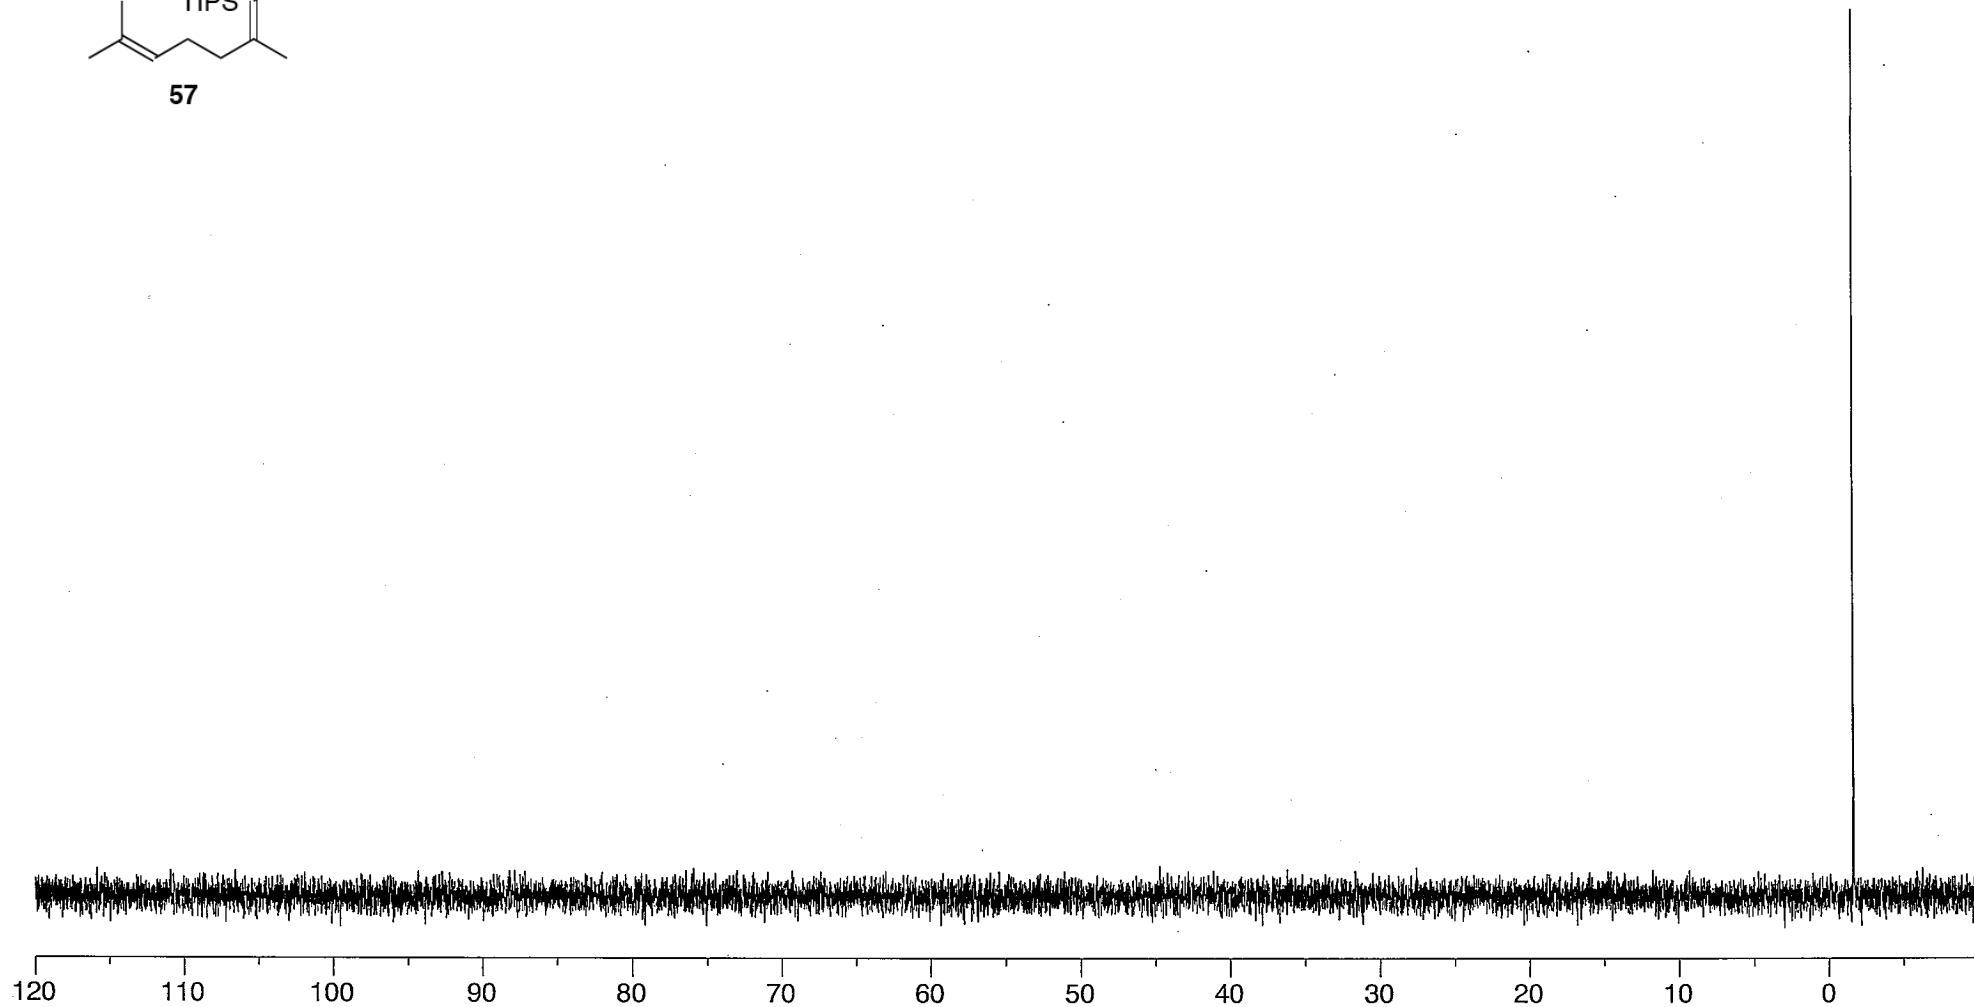

Pulse Sequence: s2pul  
Spectrometer Freq.: 399.79 MHz  
Solvent: CDCl<sub>3</sub>

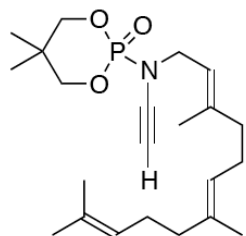

58

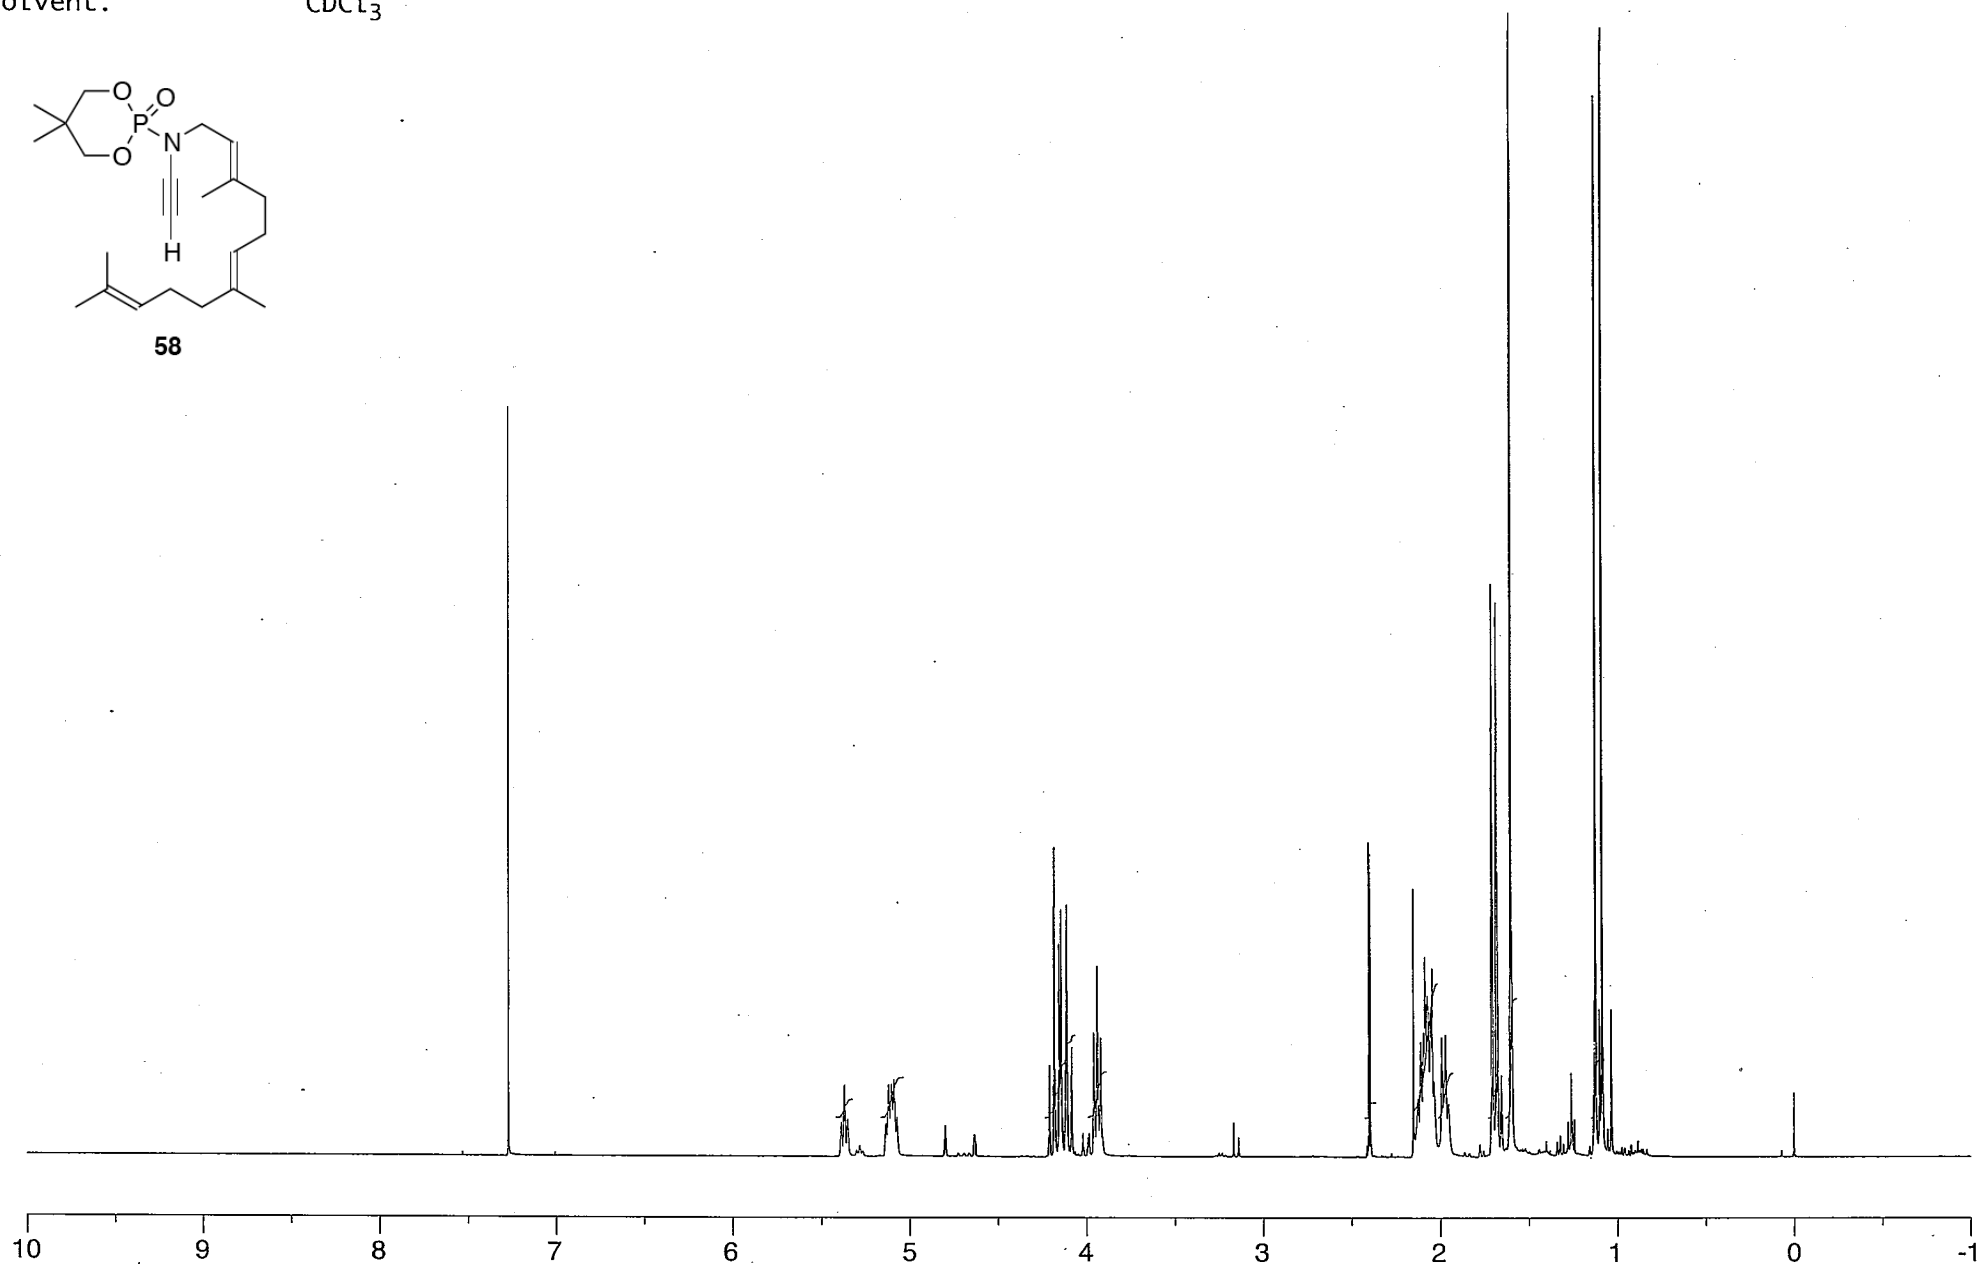



KAD-03-232\_02Jan2012

Pulse Sequence: s2pu1  
Spectrometer Freq.: 161.85 MHz  
Solvent: CDCl<sub>3</sub>

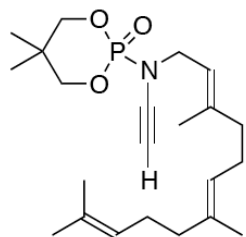

58

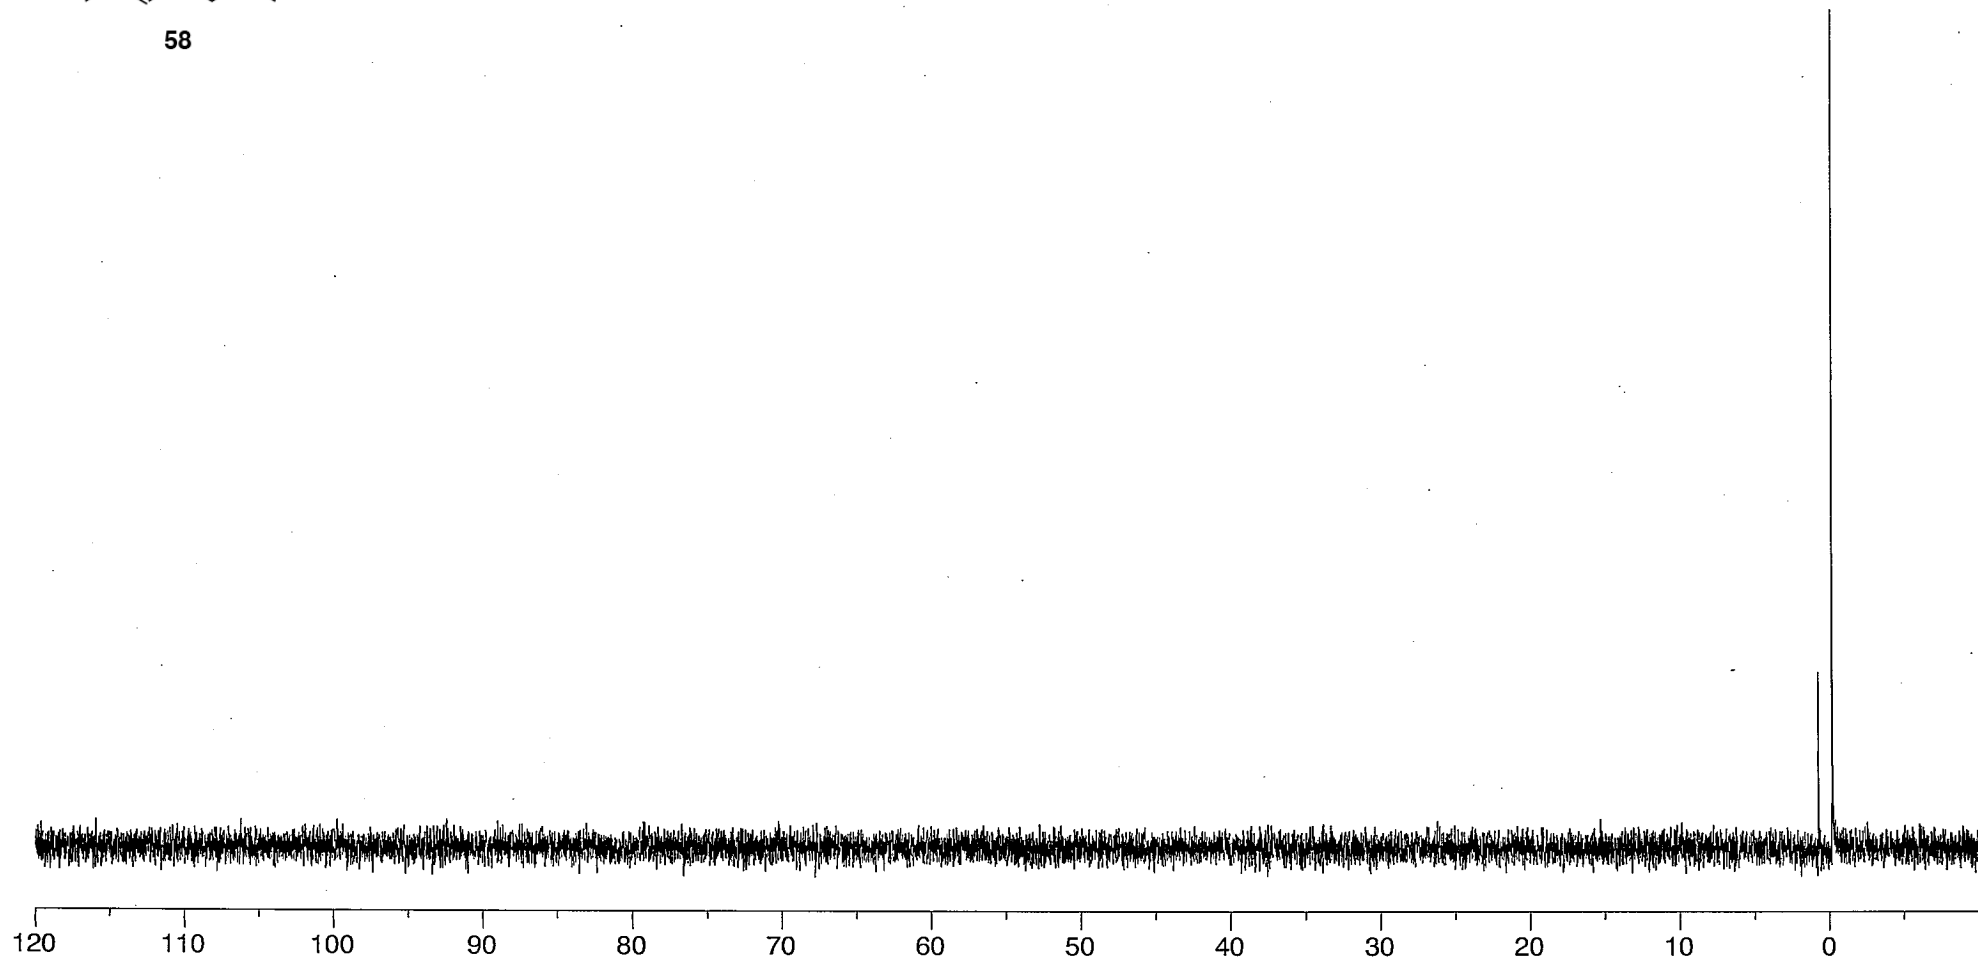



KAD-03-259\_30Jan2012

Pulse Sequence: s2pul  
Spectrometer Freq.: 399.79 MHz  
Solvent: CDCl<sub>3</sub>

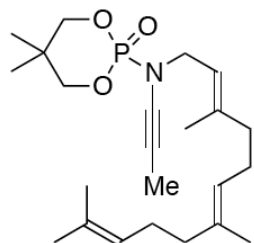

59

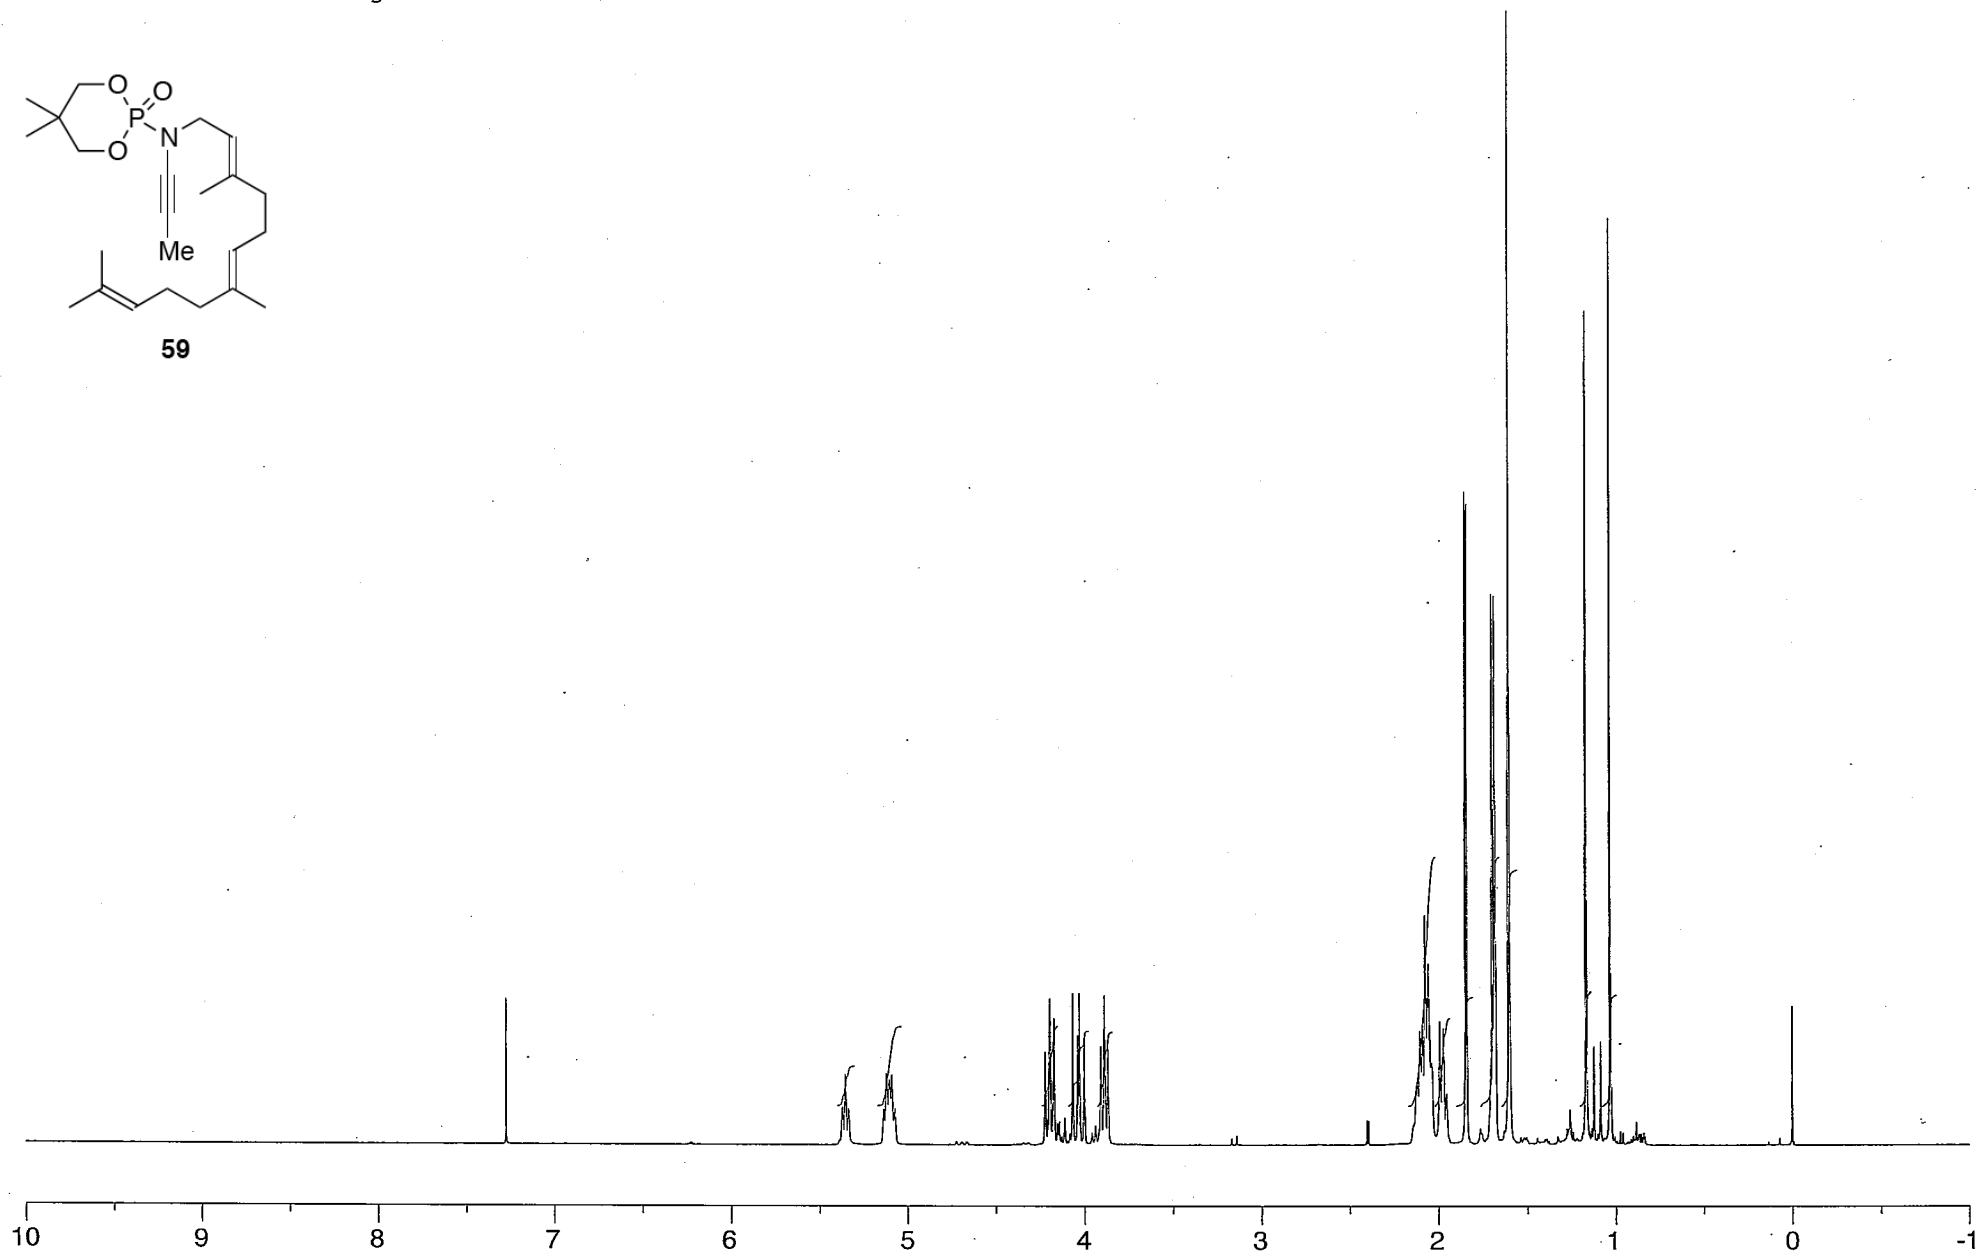

Pulse Sequence: s2pul  
Spectrometer Freq.: 100.54 MHz  
Solvent: CDCl<sub>3</sub>

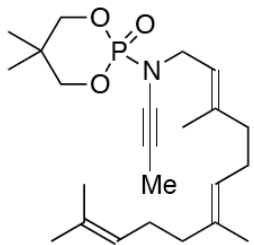

59

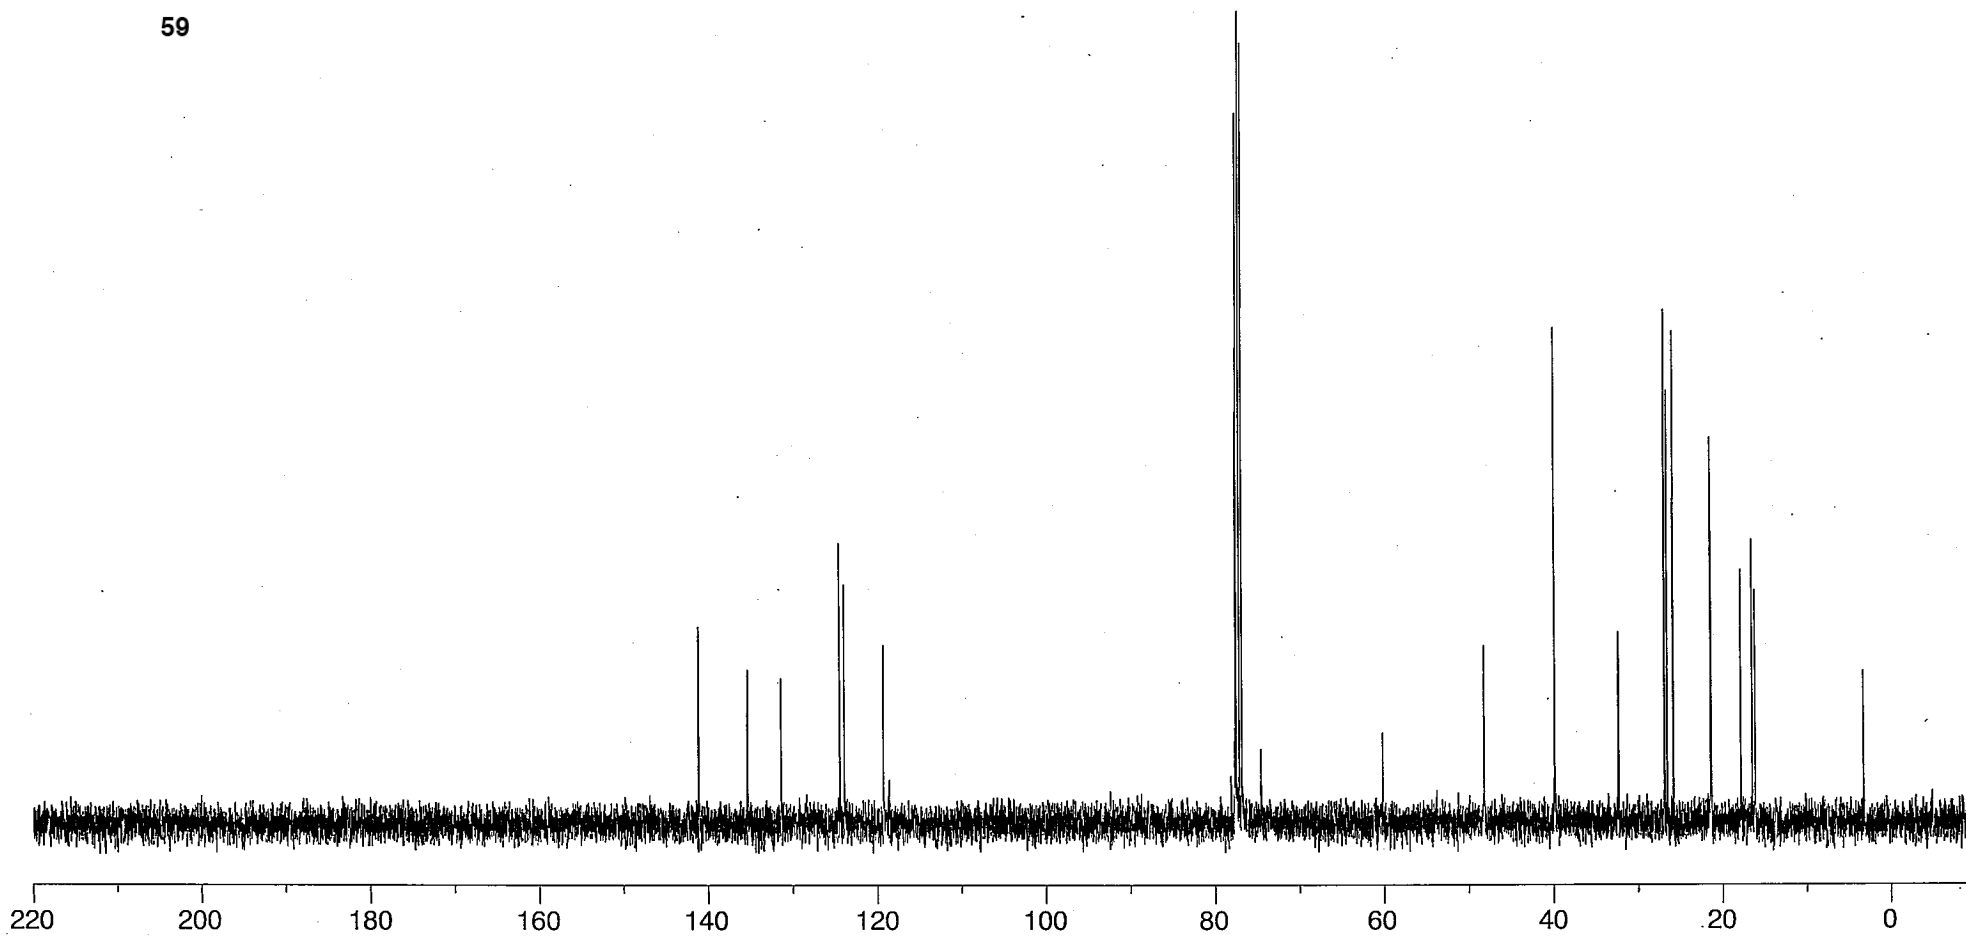

KAD-03-259\_30Jan2012

Pulse Sequence: s2pul  
Spectrometer Freq.: 161.85 MHz  
Solvent: CDCl<sub>3</sub>

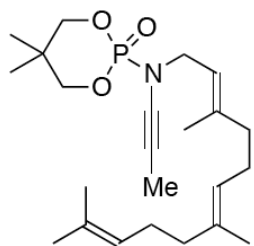

59

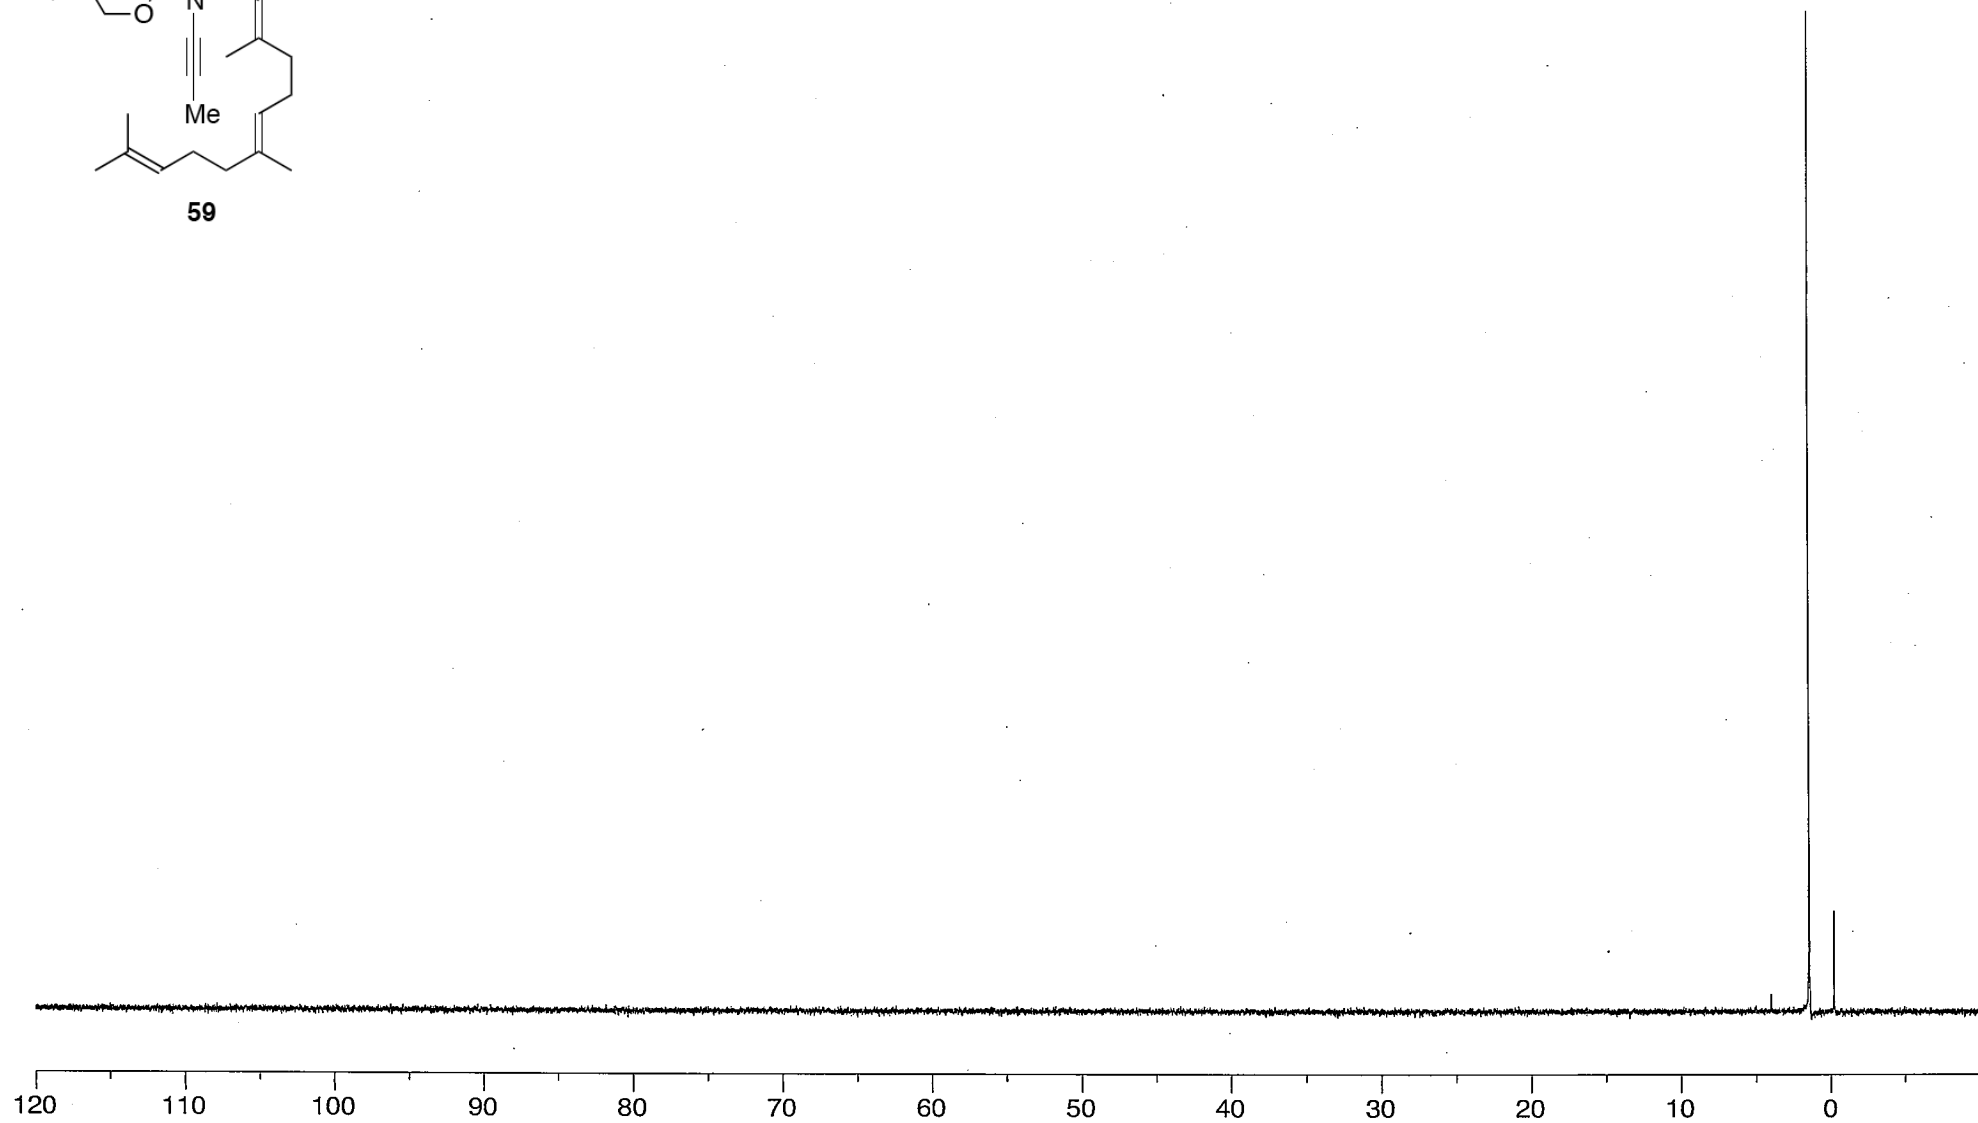

KAD-03-260Elim2\_02Feb2012

Pulse Sequence: s2pul

Spectrometer Freq.: 399.79 MHz

Solvent: CDCl<sub>3</sub>

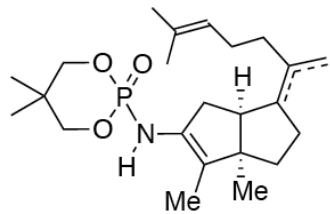

62

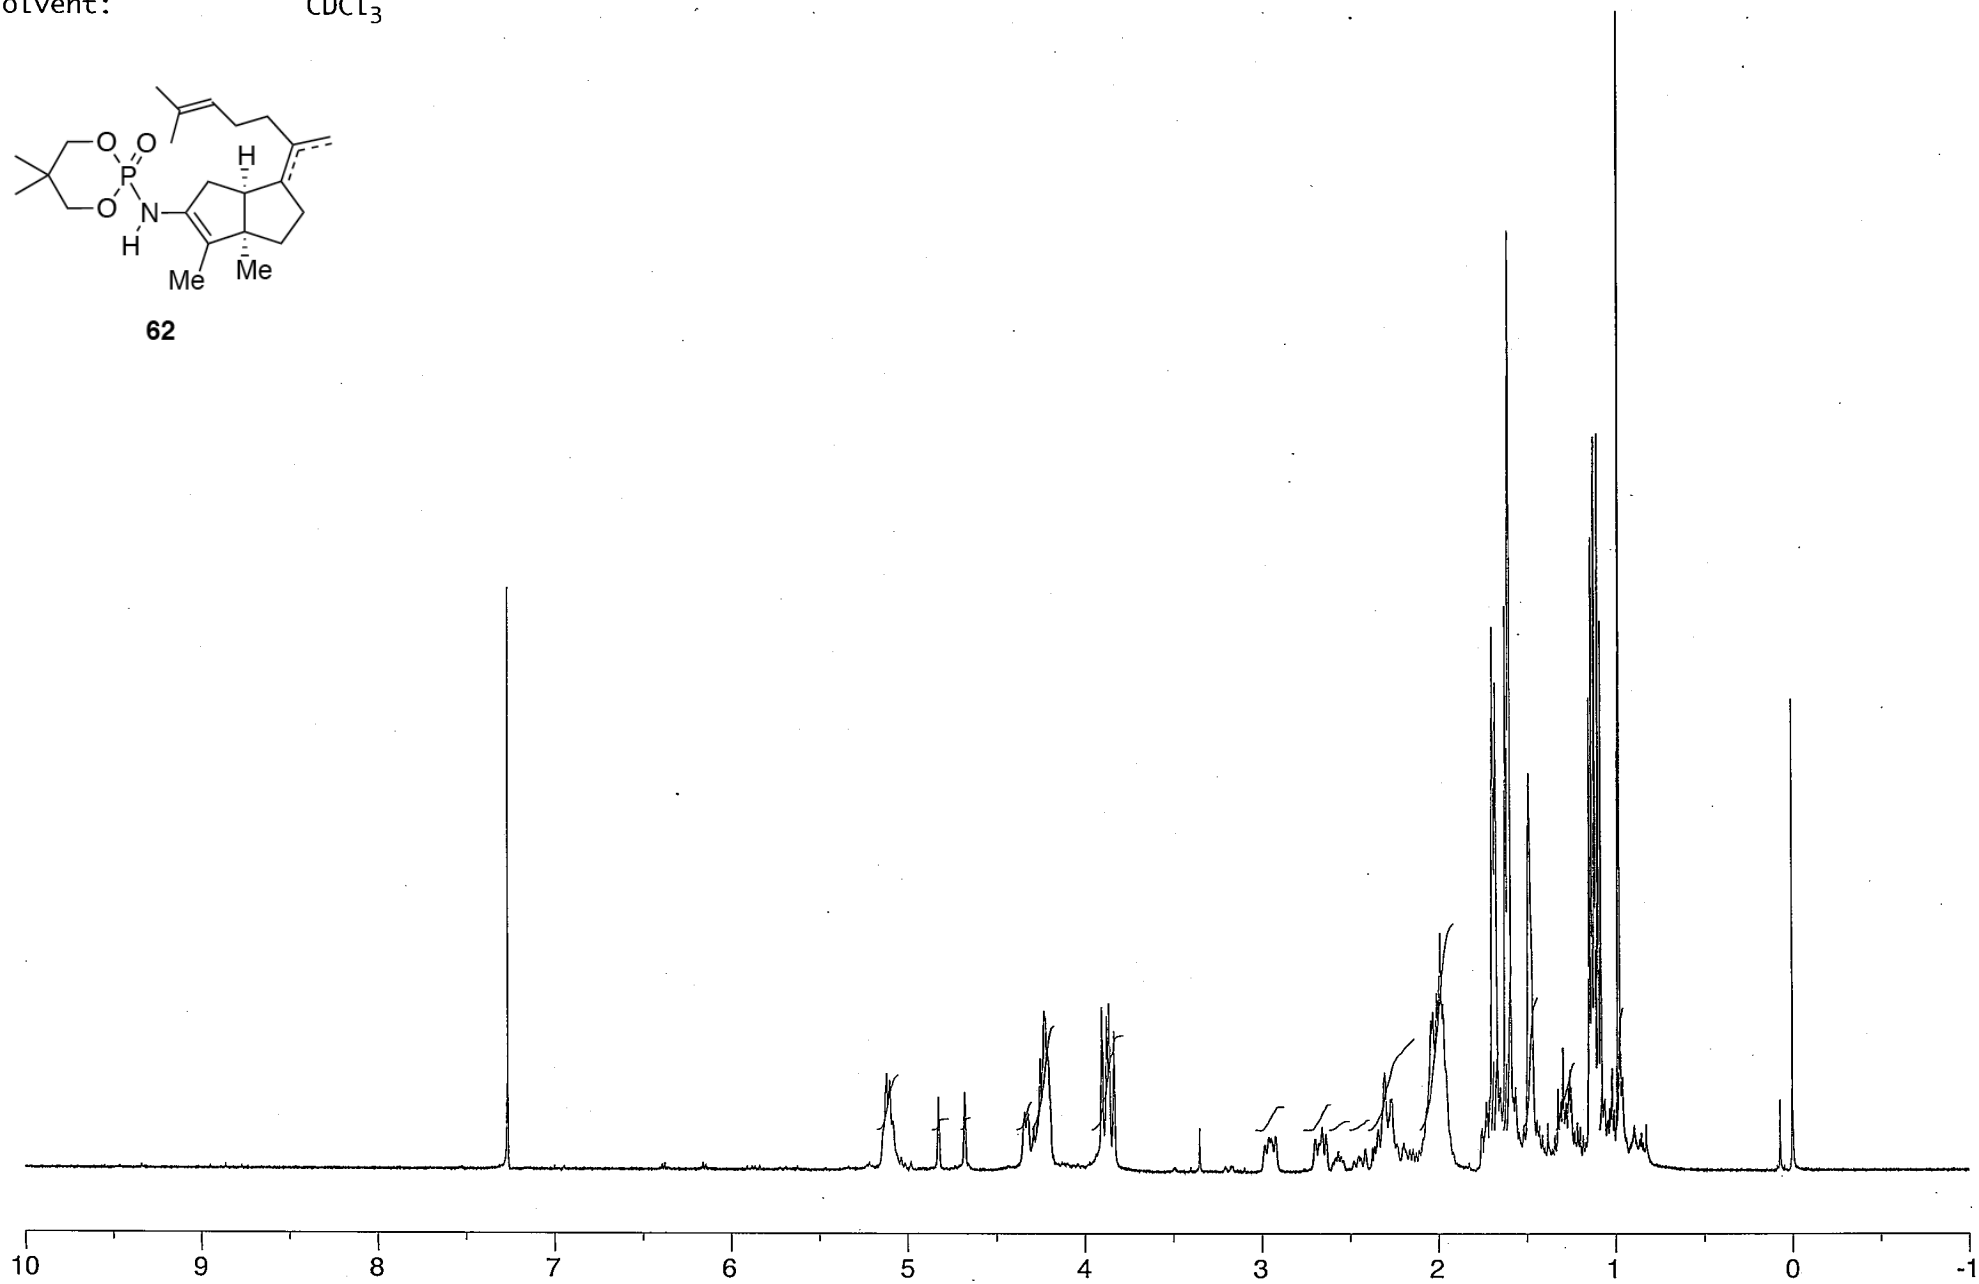

Pulse Sequence: s2pul  
Spectrometer Freq.: 161.85 MHz  
Solvent: CDCl<sub>3</sub>

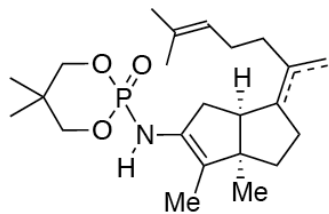

62

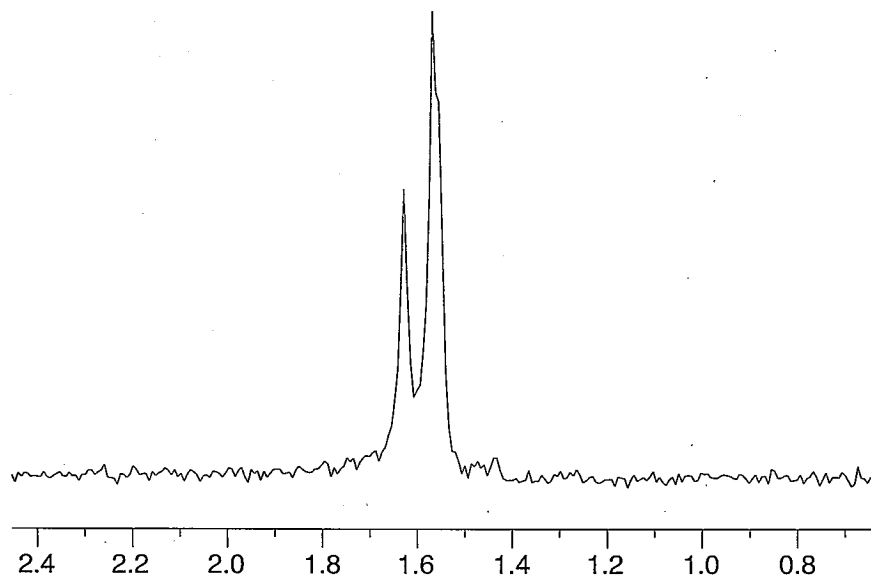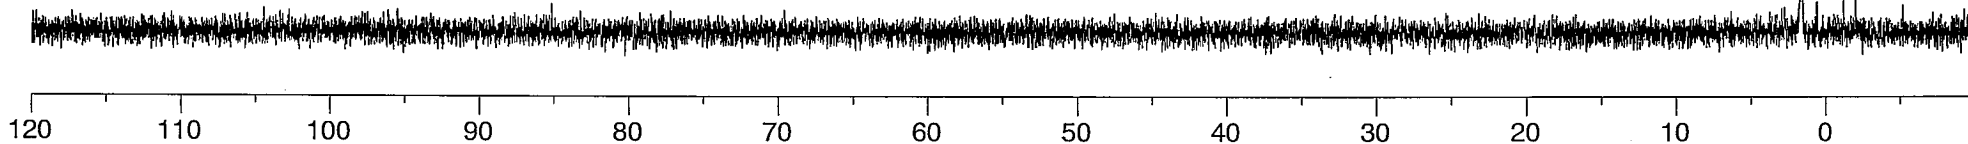

Pulse Sequence: s2pul  
Spectrometer Freq.: 499.73 MHz  
Solvent: CDCl<sub>3</sub>

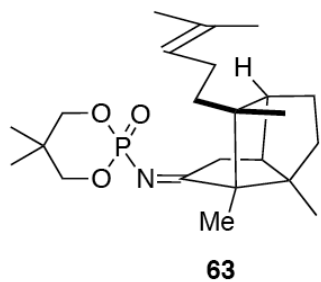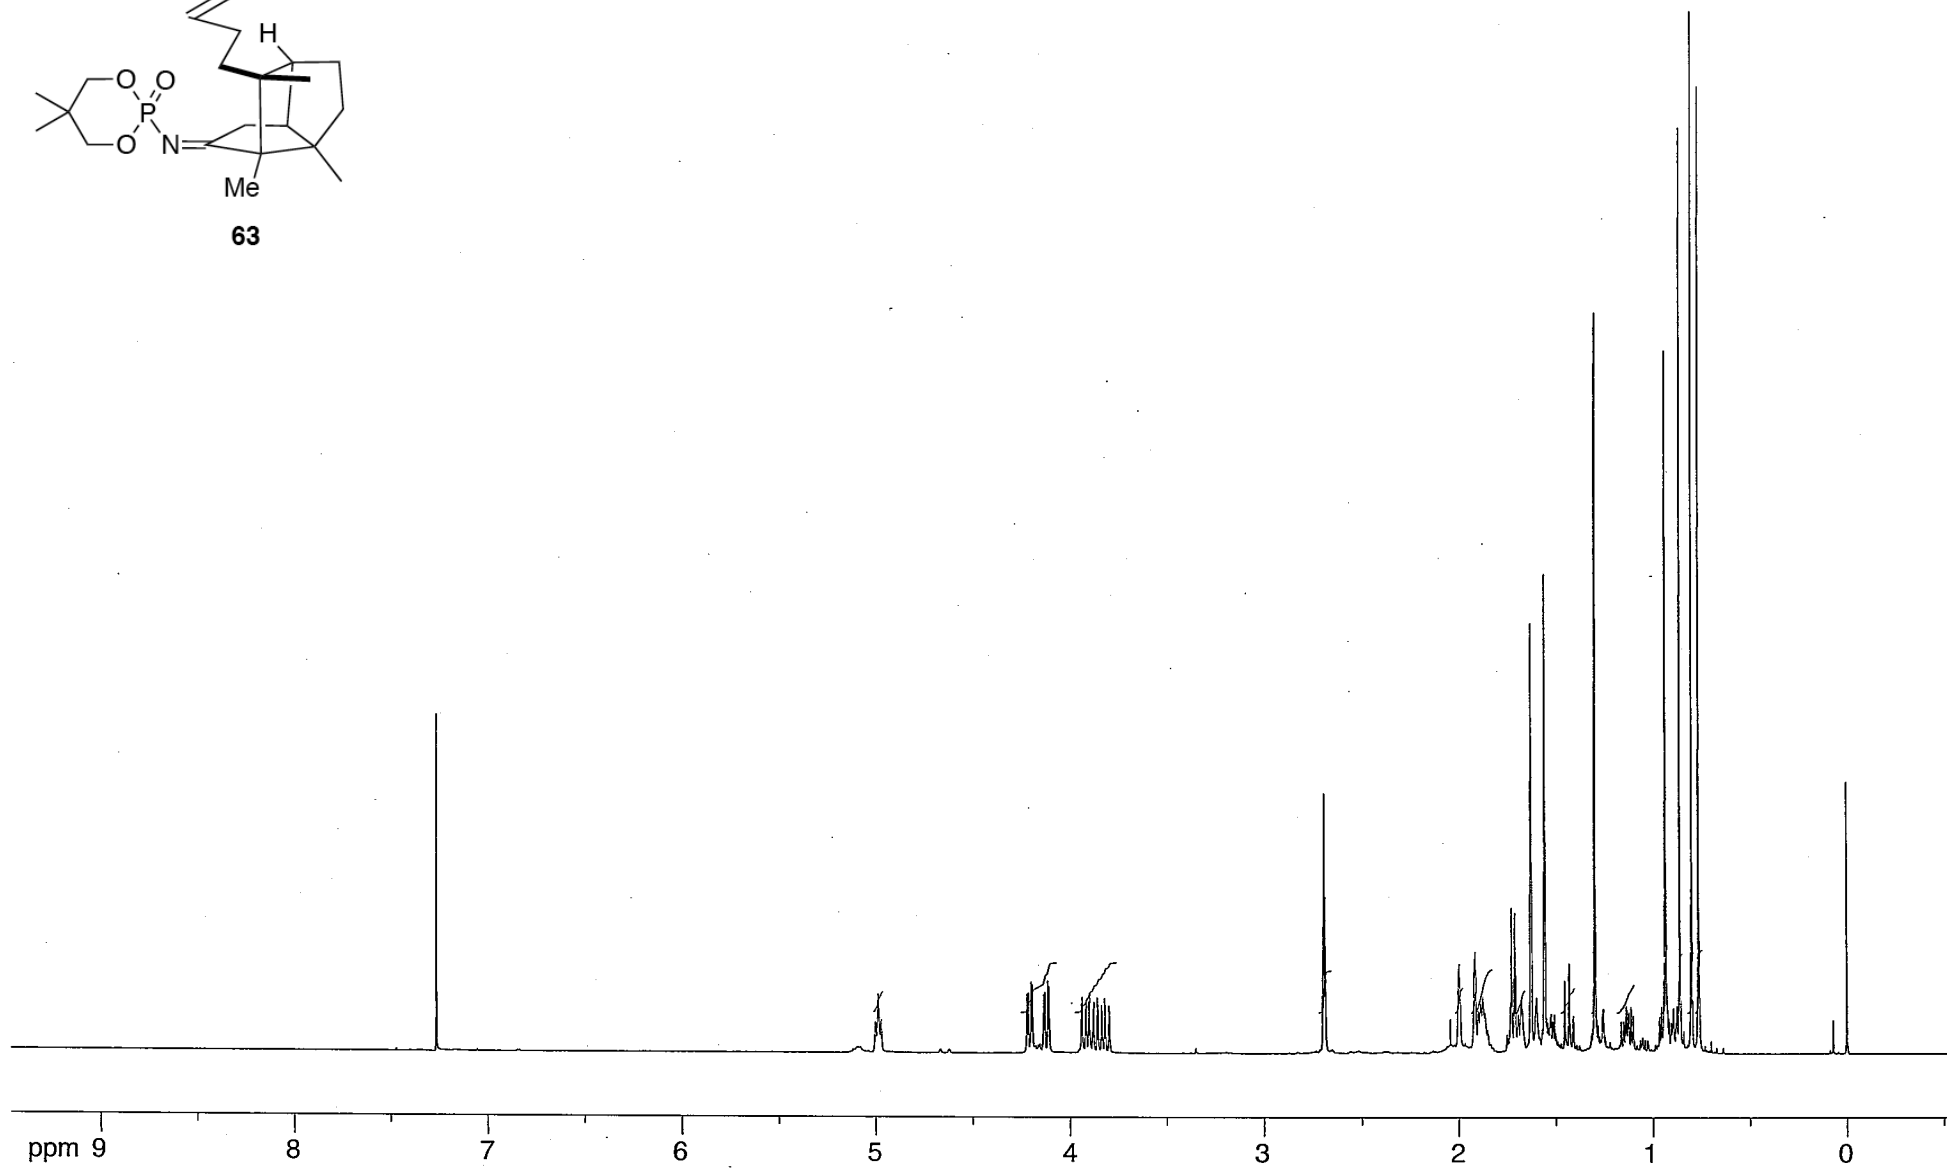

KAD-03-260FR8-9C\_\_01Feb2012

Pulse Sequence: s2pu1  
Spectrometer Freq.: 100.54 MHz  
Solvent: CDCl<sub>3</sub>

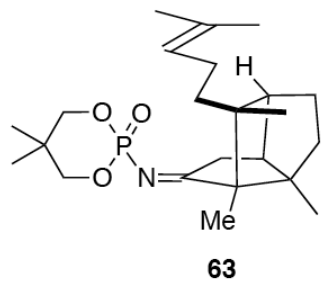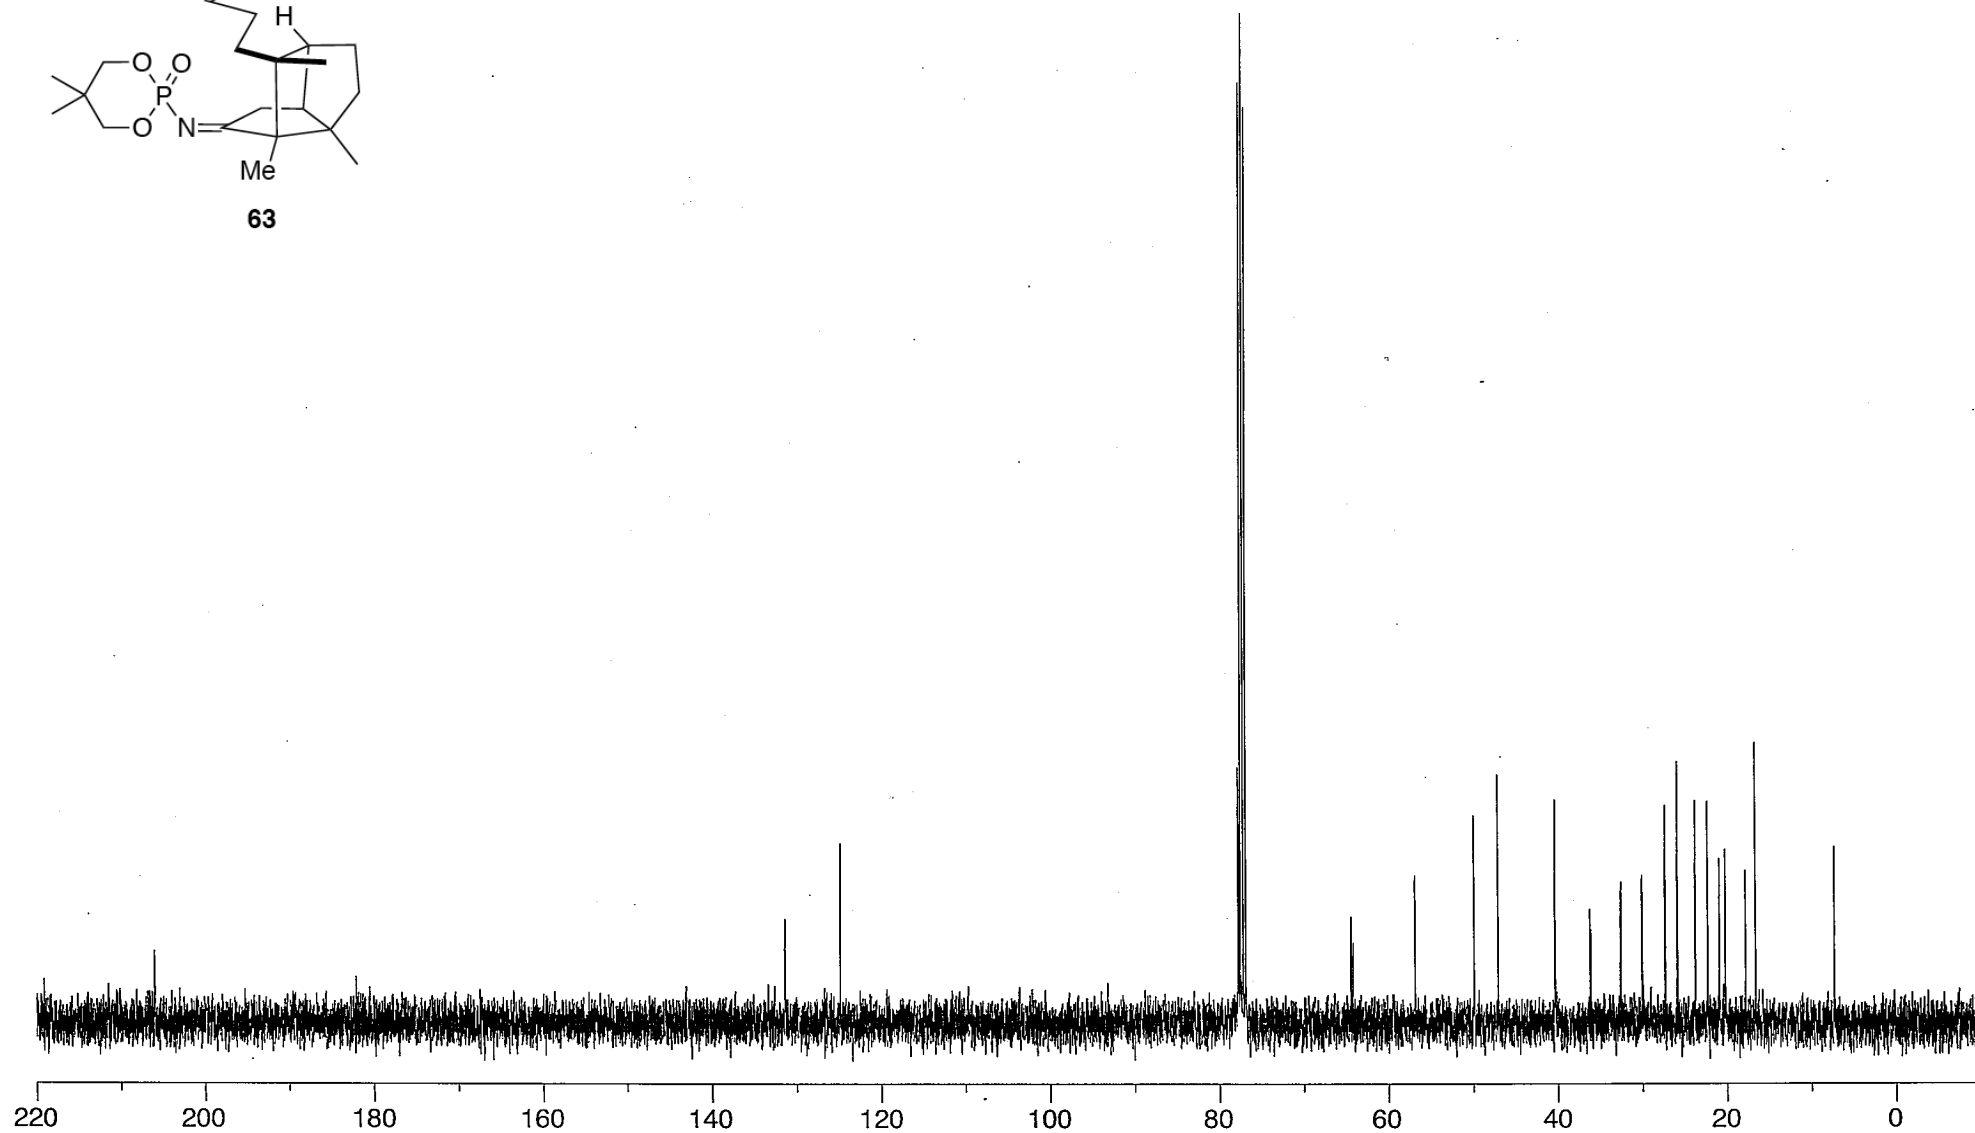

KAD-03-260FR8-9\_01Feb2012

Pulse Sequence: s2pul  
Spectrometer Freq.: 161.85 MHz  
Solvent: CDCl<sub>3</sub>

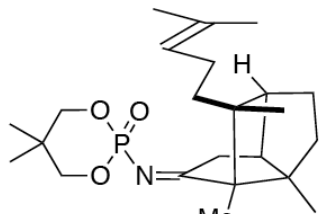

**63**

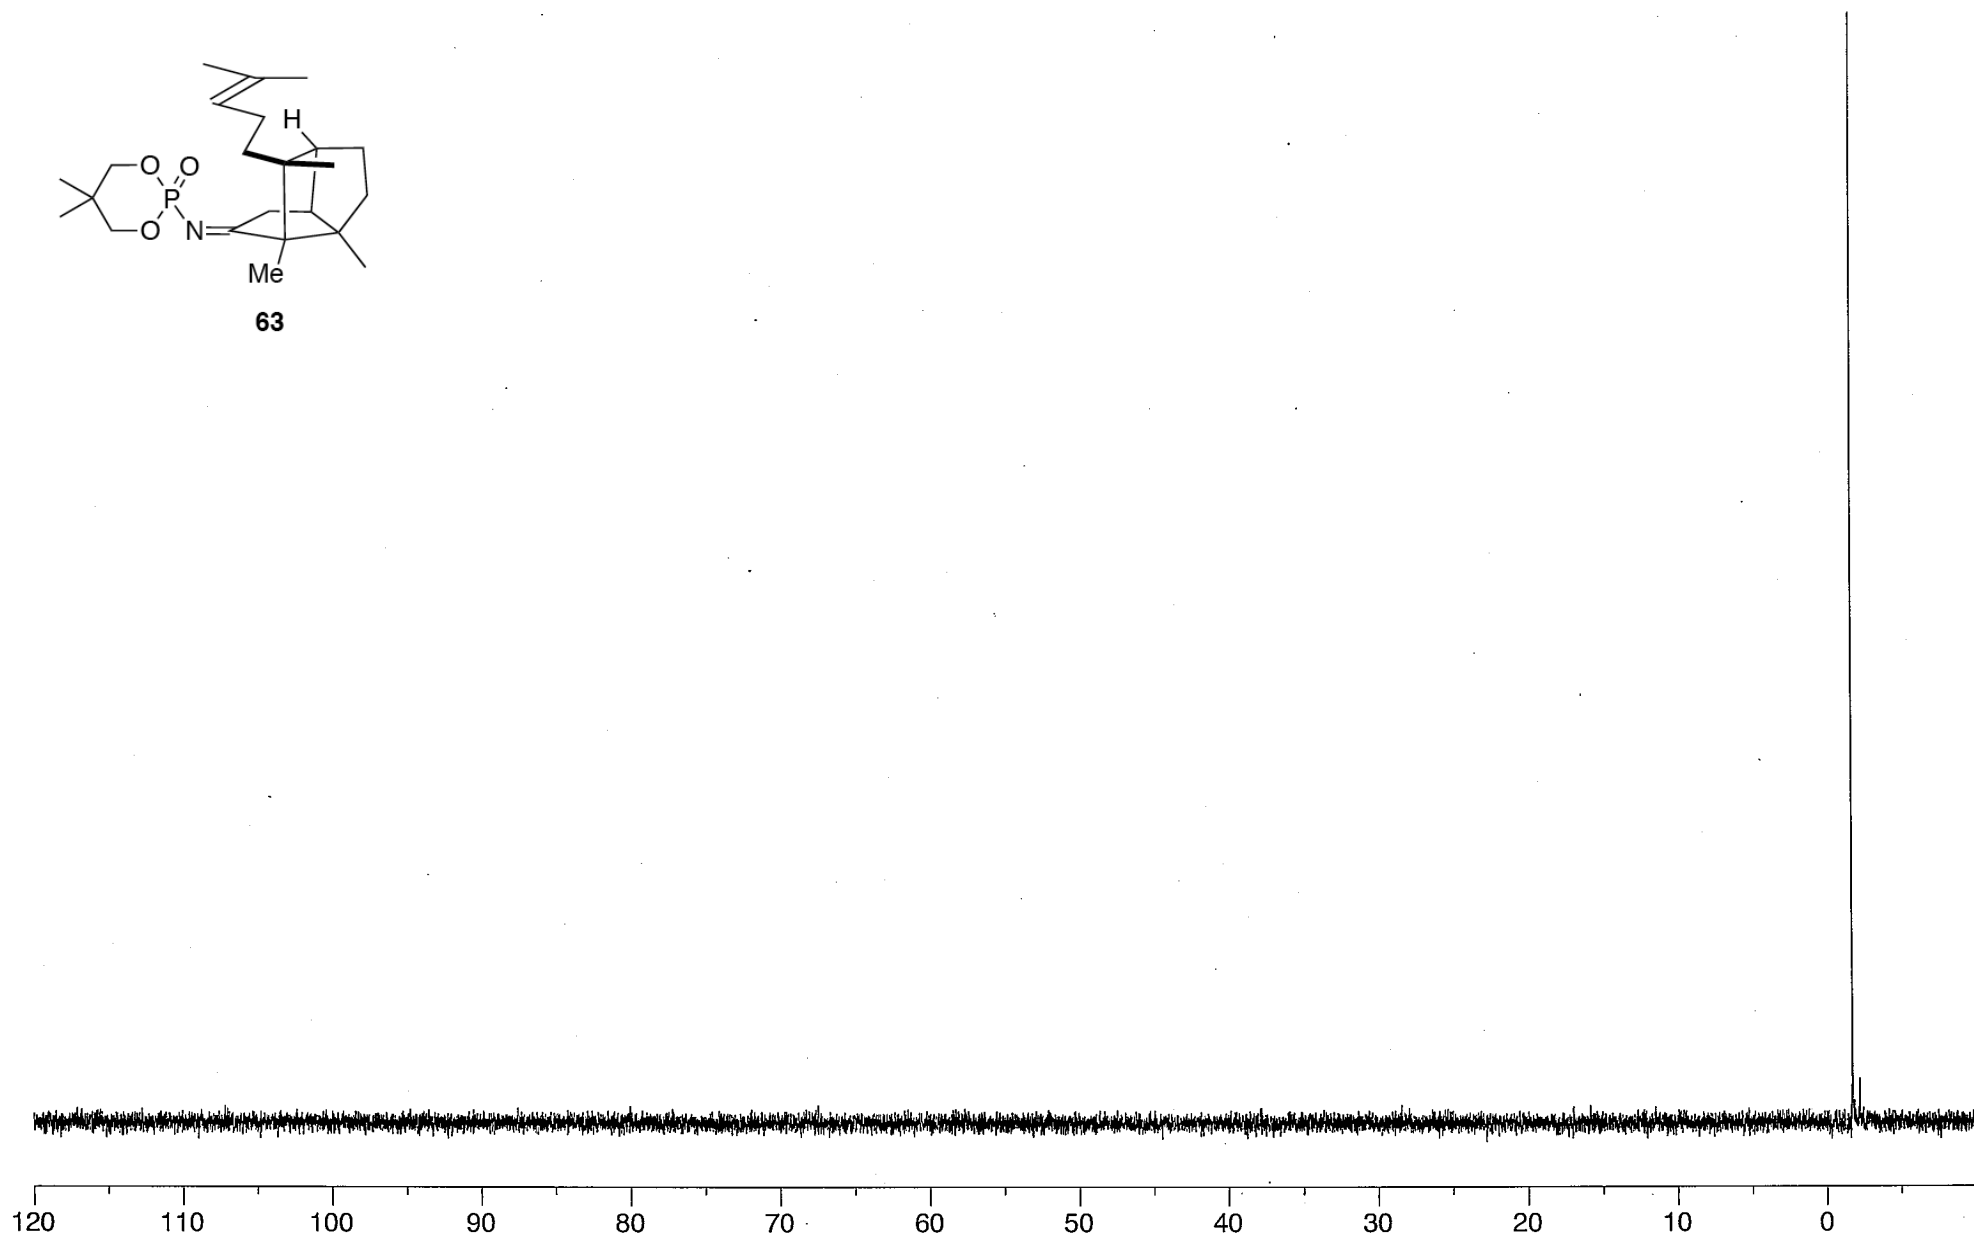



KAD-03-260FR8-9\_\_01Feb2012

Archive directory: /export/home/kyle/vnmrsys/data  
Sample directory: KAD-03-260FR8-9\_\_01Feb2012

Pulse Sequence: gCOSY

Solvent: CDCl3  
Temp. 25.0 C / 298.1 K  
File: gCOSY  
INOVA-500 "nmr03"

Relax. delay 1.000 sec  
Acq. time 0.204 sec  
Width 5008.8 Hz  
2D Width 5006.3 Hz  
Single scan  
128 increments  
OBSERVE H1, 499.7288149 MHz  
DATA PROCESSING  
Sq. sine bell 0.102 sec  
F1 DATA PROCESSING  
Sq. sine bell 0.026 sec  
FT size 2048 x 2048  
Total time 2 min, 56 sec

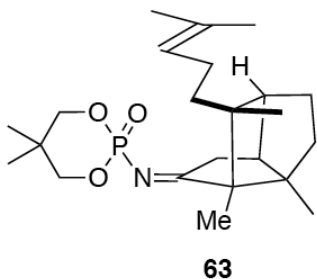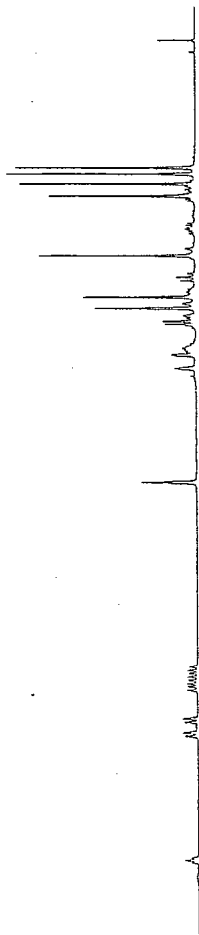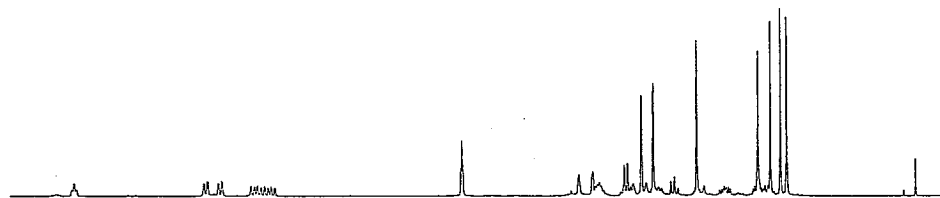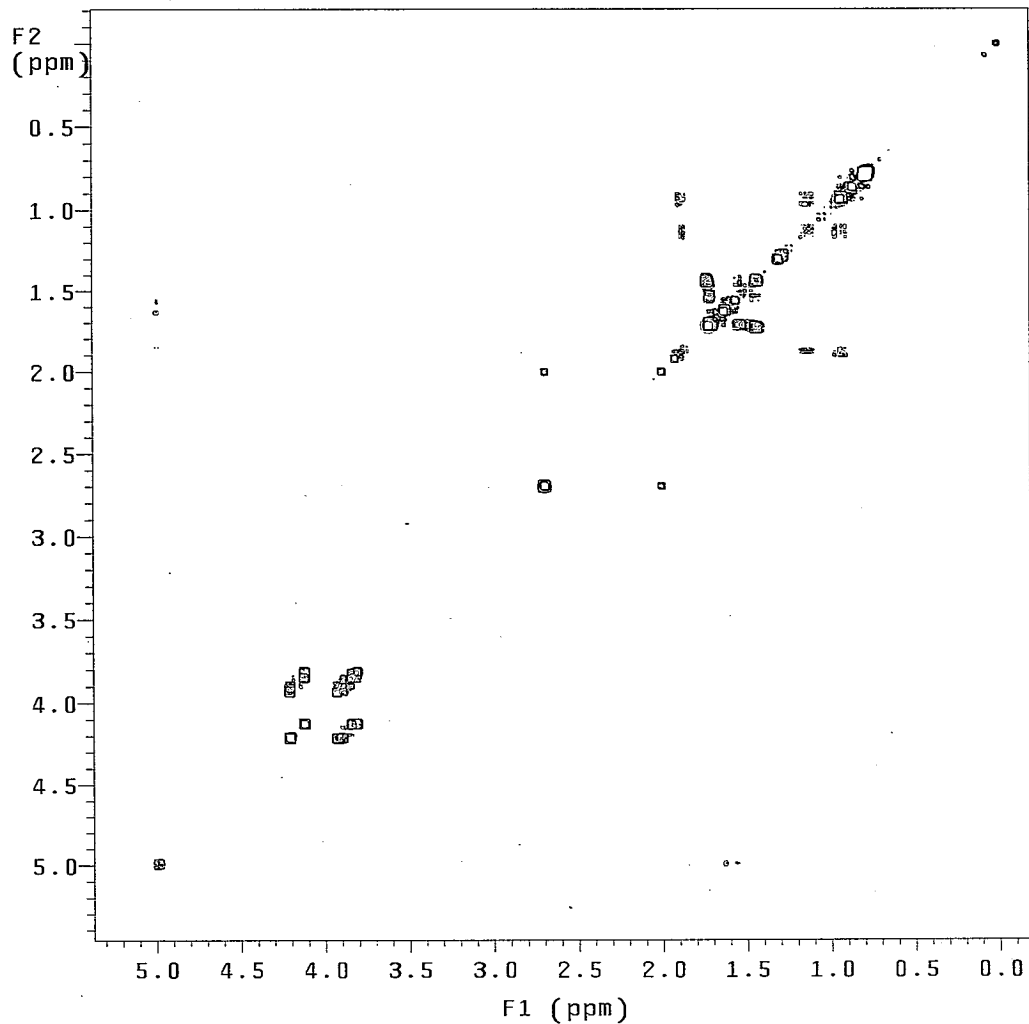

S113

KAD-03-260FR8-9\_\_01Feb2012

Archive directory: /export/home/kyle/vnmrsys/data  
Sample directory: KAD-03-260FR8-9\_\_01Feb2012  
File: NOESY1D\_3\_87p

Pulse Sequence: NOESY1D

Solvent: CDCl3  
Temp. 25.0 C / 298.1 K  
INOVA-500 "ui500"

Relax. delay 1.000 sec  
Pulse 90.0 degrees  
Mixing 0.500 sec  
Acq. time 3.743 sec  
Width 5008.8 Hz  
25 repetitions  
OBSERVE H1, 499.7288149 MHz  
DATA PROCESSING  
Line broadening 0.3 Hz  
FT size 65536  
Total time 5 min, 53 sec

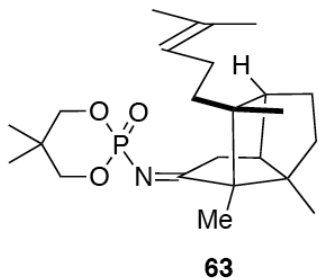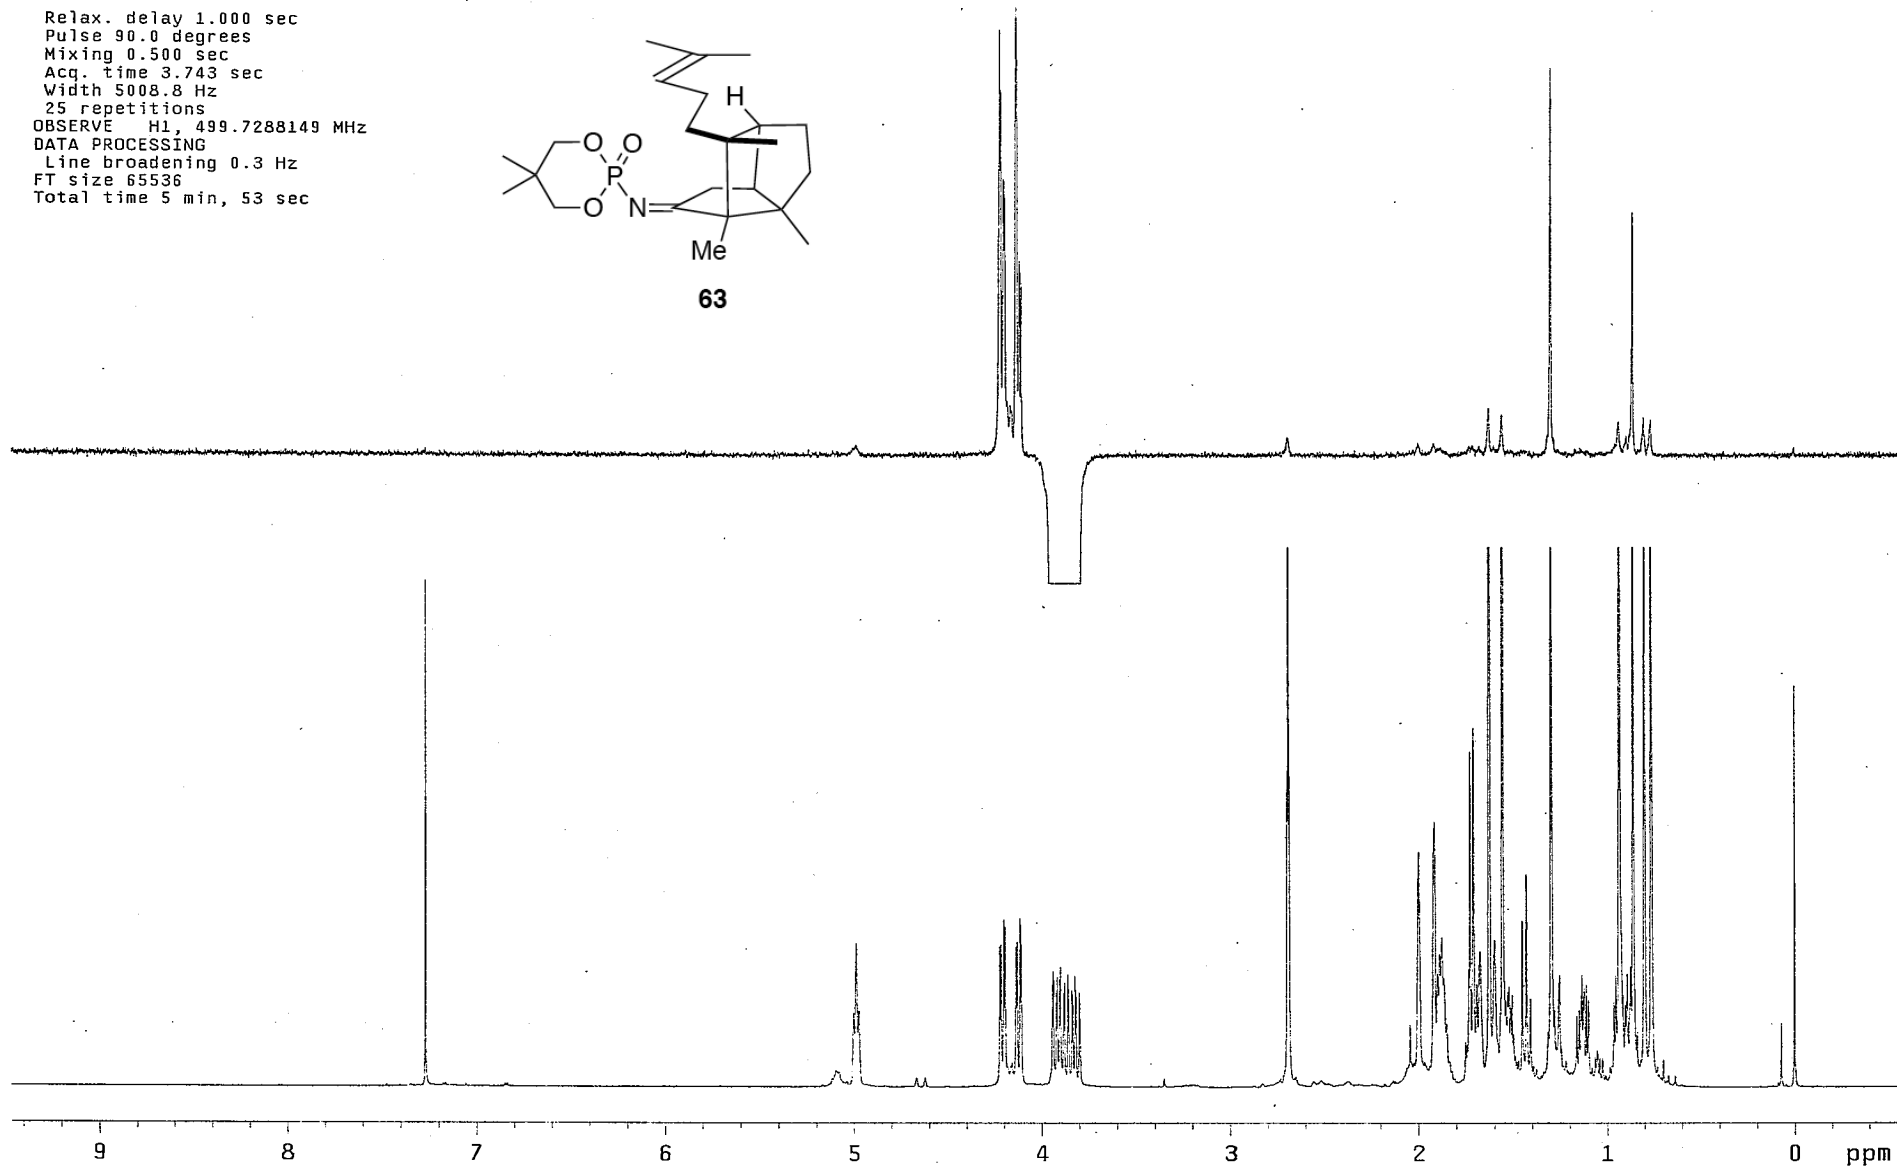

KAD-03-260FR8-9\_\_01Feb2012

Archive directory: /export/home/kyle/vnmrsys/data  
Sample directory: KAD-03-260FR8-9\_\_01Feb2012

Pulse Sequence: NOESY1D

Solvent: CDCl3  
Temp. 25.0 C / 298.1 K  
File: NOESY1D\_2\_71p  
INOVA-500 "nmr03"

Relax. delay 1.000 sec  
Pulse 90.0 degrees  
Mixing 0.500 sec  
Acq. time 3.743 sec  
Width 5008.8 Hz  
64 repetitions  
OBSERVE H1, 499.7288149 MHz  
DATA PROCESSING  
Line broadening 0.3 Hz  
FT size 65536  
Total time 5 min, 54 sec

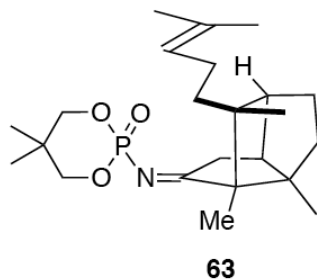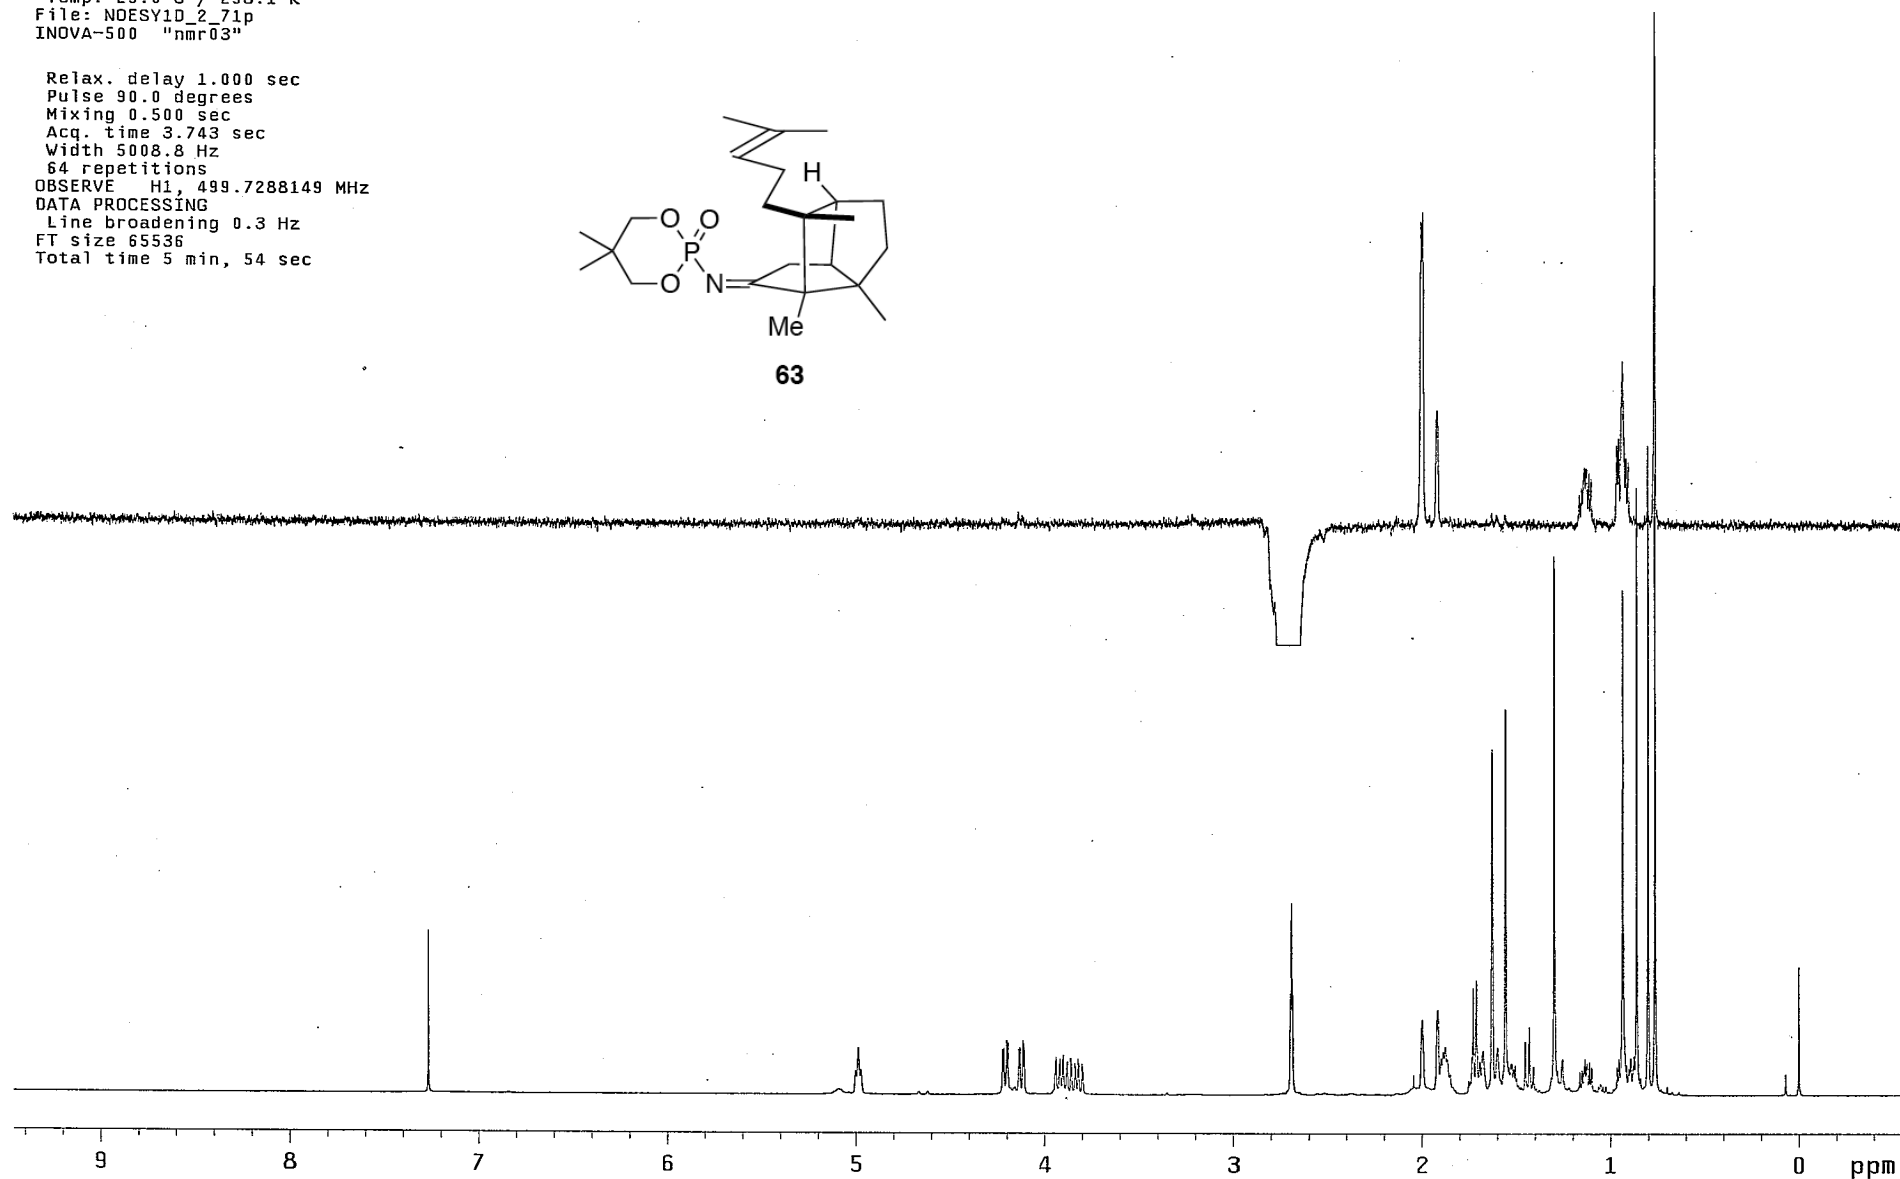

KAD-03-260FR8-9\_\_01Feb2012

Archive directory: /export/home/kyle/vnmrsys/data  
Sample directory: KAD-03-260FR8-9\_\_01Feb2012  
File: NOESY1D\_2\_00p

Pulse Sequence: NOESY1D

Solvent: CDCl3  
Temp. 25.0 C / 298.1 K  
INOVA-500 "ui500"

Relax. delay 1.000 sec  
Pulse 90.0 degrees  
Mixing 0.500 sec  
Acq. time 3.743 sec  
Width 5008.8 Hz  
64 repetitions  
OBSERVE H1, 499.7288149 MHz  
DATA PROCESSING  
Line broadening 0.3 Hz  
FT size 65536  
Total time 6 min, 9 sec

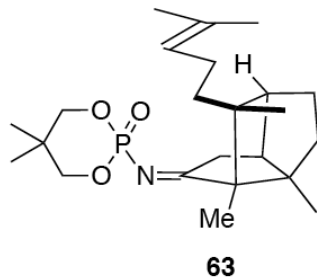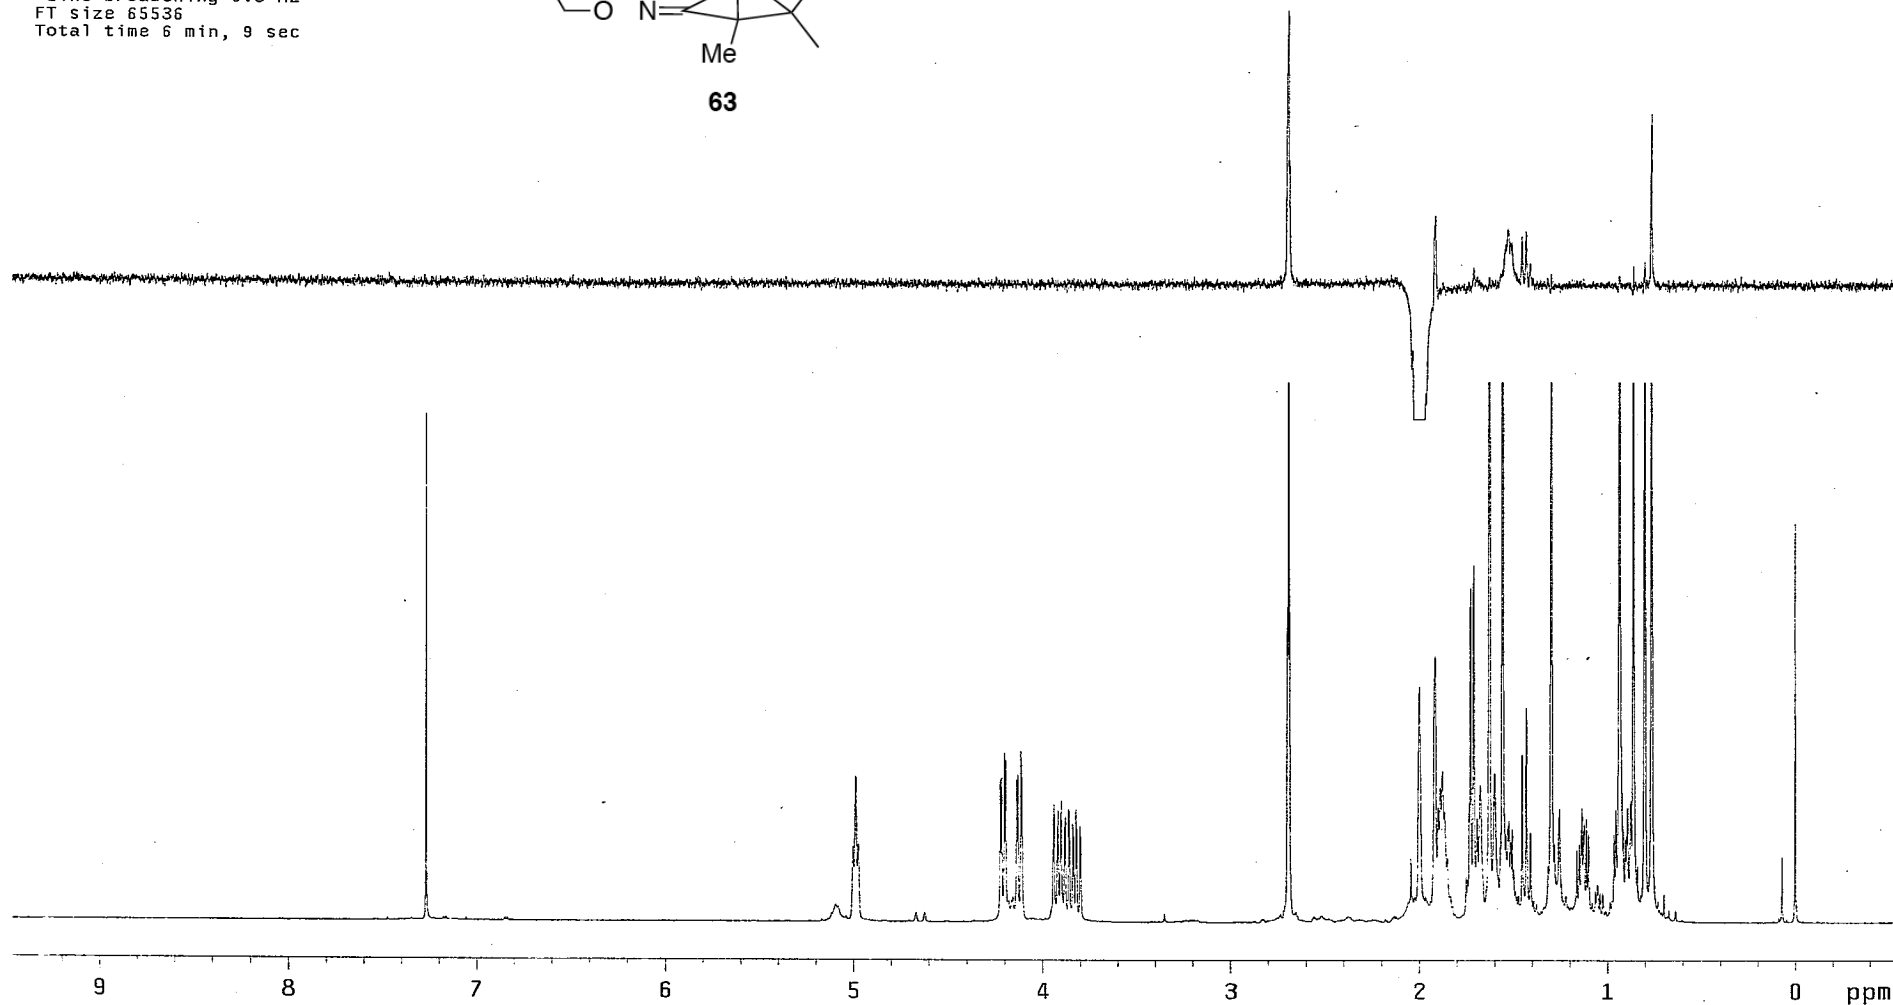

KAD-03-260FR8-9\_\_01Feb2012

Archive directory: /export/home/kyle/vnmrsys/data  
Sample directory: KAD-03-260FR8-9\_\_01Feb2012  
File: NOESY1D\_1\_92p

Pulse Sequence: NOESY1D

Solvent: CDCl3  
Temp. 25.0 C / 298.1 K  
INOVA-500 "ui500"

Relax. delay 1.000 sec  
Pulse 90.0 degrees  
Mixing 0.500 sec  
Acq. time 3.743 sec  
Width 5008.8 Hz  
64 repetitions  
OBSERVE H1, 499.7288149 MHz  
DATA PROCESSING  
Line broadening 0.3 Hz  
FT size 65536  
Total time 6 min, 9 sec

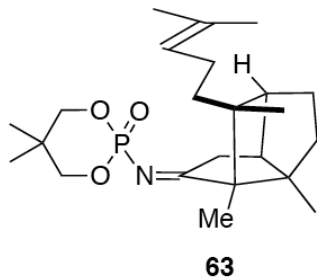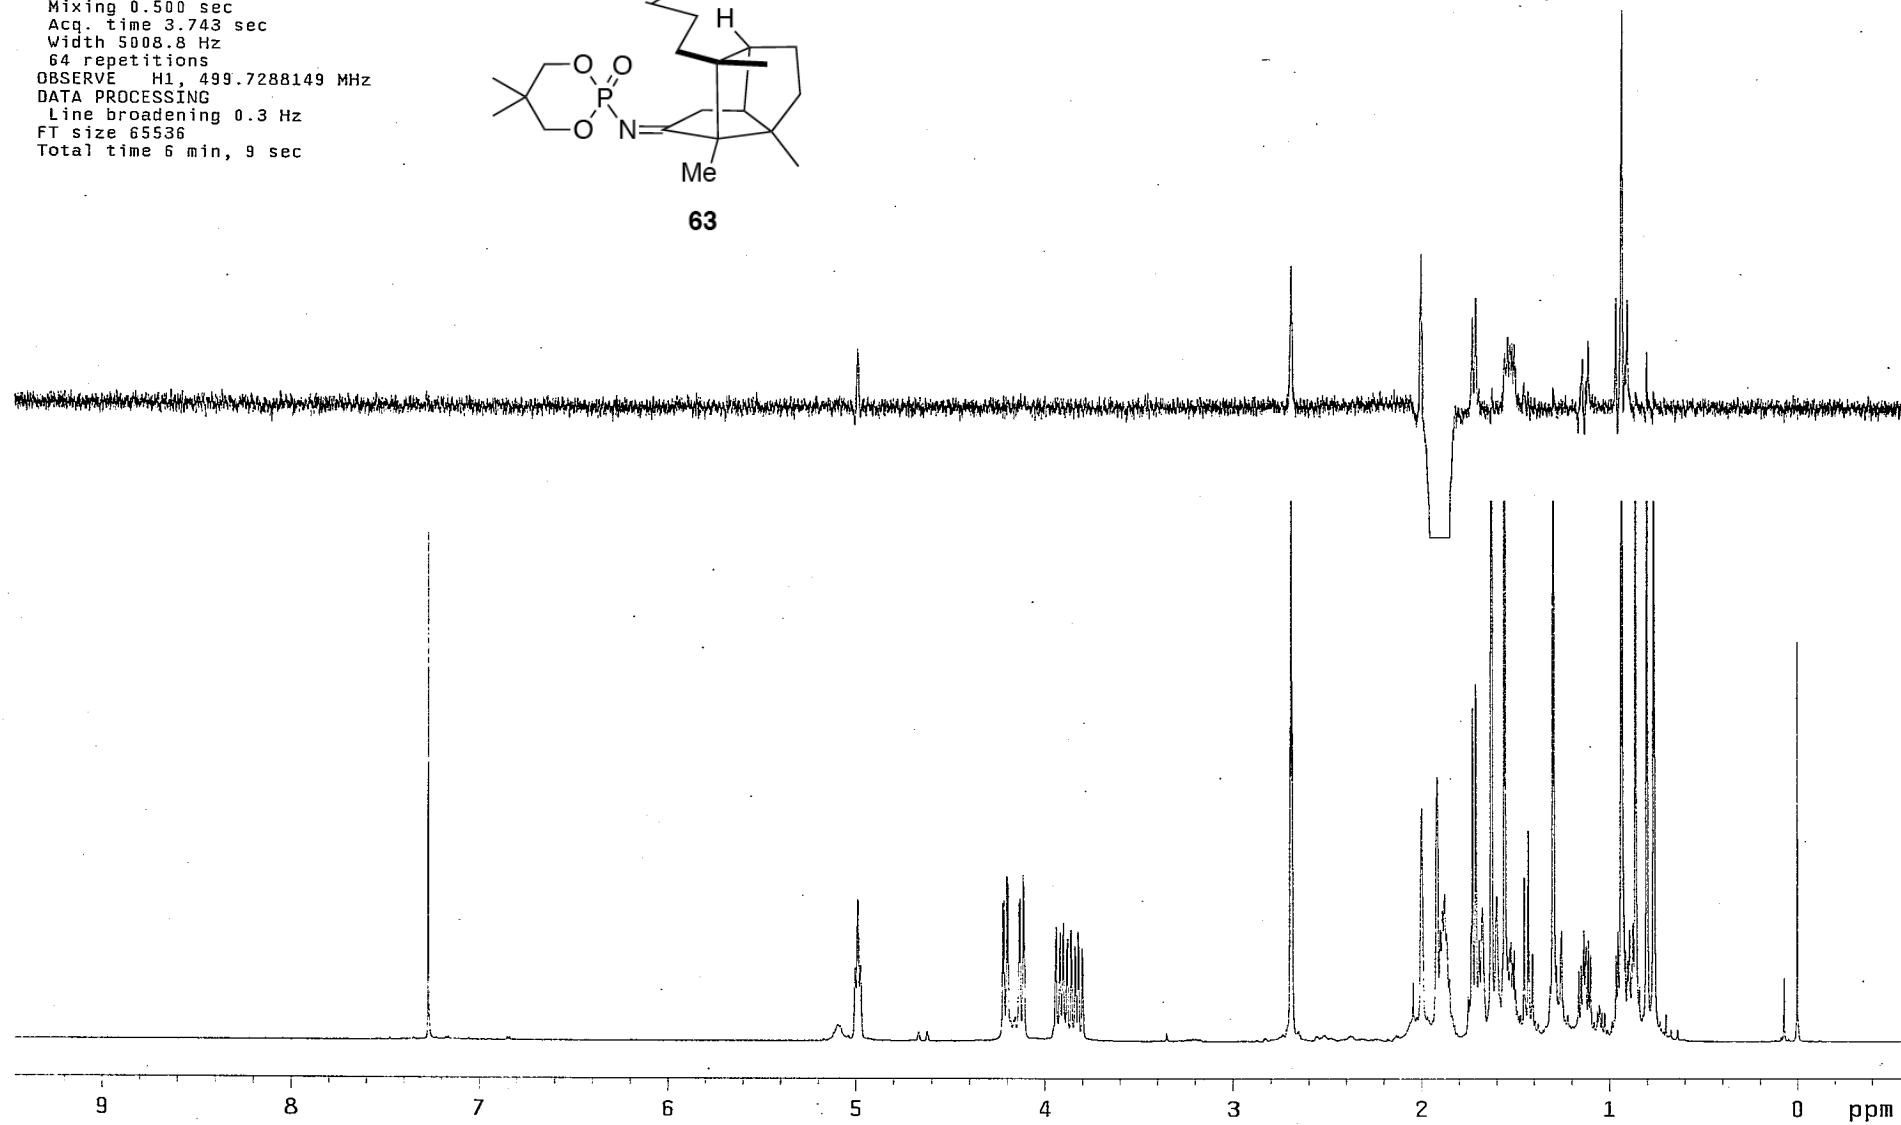

KAD-03-260FR8-9\_\_01Feb2012

Archive directory: /export/home/kyle/vnmrsys/data  
Sample directory: KAD-03-260FR8-9\_\_01Feb2012  
File: NOESY1D\_1\_43p

Pulse Sequence: NOESY1D

Solvent: CDCl3  
Temp. 25.0 C / 298.1 K  
INOVA-500 "ui500"

Relax. delay 1.000 sec  
Pulse 90.0 degrees  
Mixing 0.500 sec  
Acq. time 3.743 sec  
Width 5008.8 Hz  
64 repetitions  
OBSERVE H1, 499.7288149 MHz  
DATA PROCESSING  
Line broadening 0.3 Hz  
FT size 65536  
Total time 6 min, 1 sec

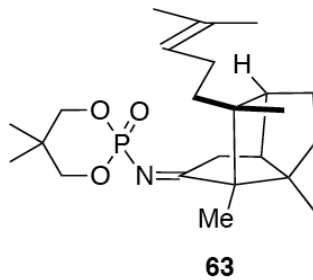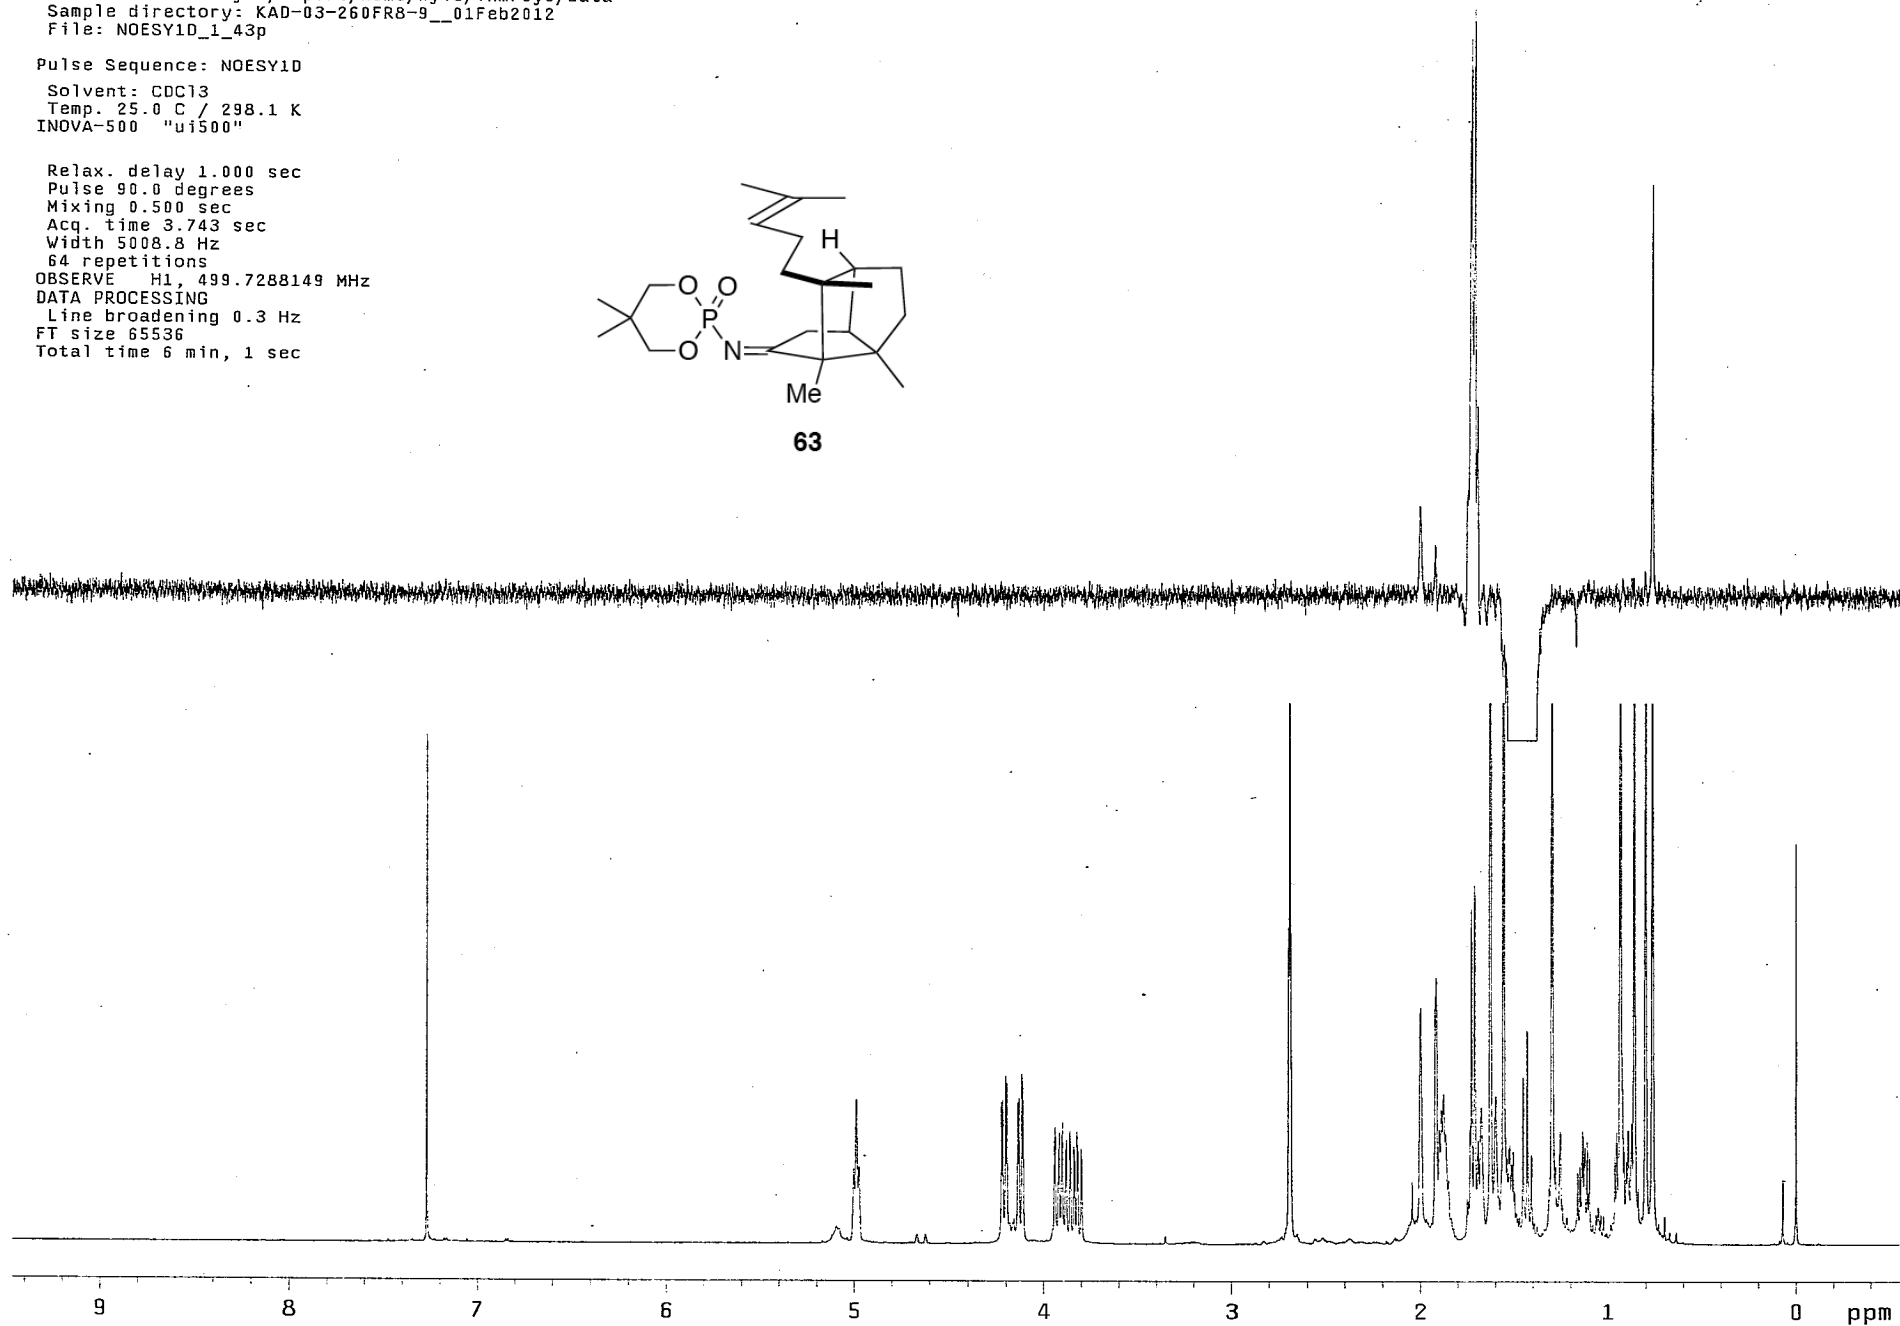

KAD-03-260FR8-9\_\_01Feb2012

Archive directory: /export/home/kyle/vnmrsys/data  
Sample directory: KAD-03-260FR8-9\_\_01Feb2012  
File: NOESY1D\_1\_14p

Pulse Sequence: NOESY1D

Solvent: CDCl3  
Temp. 25.0 C / 298.1 K  
INOVA-500 "ui500"

Relax. delay 1.000 sec  
Pulse 90.0 degrees  
Mixing 0.500 sec  
Acq. time 3.743 sec  
Width 5008.8 Hz  
64 repetitions  
OBSERVE H1, 499.7288149 MHz  
DATA PROCESSING  
Line broadening 0.3 Hz  
FT size 65536  
Total time 6 min, 0 sec

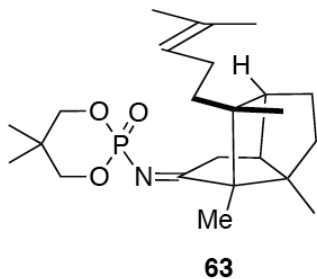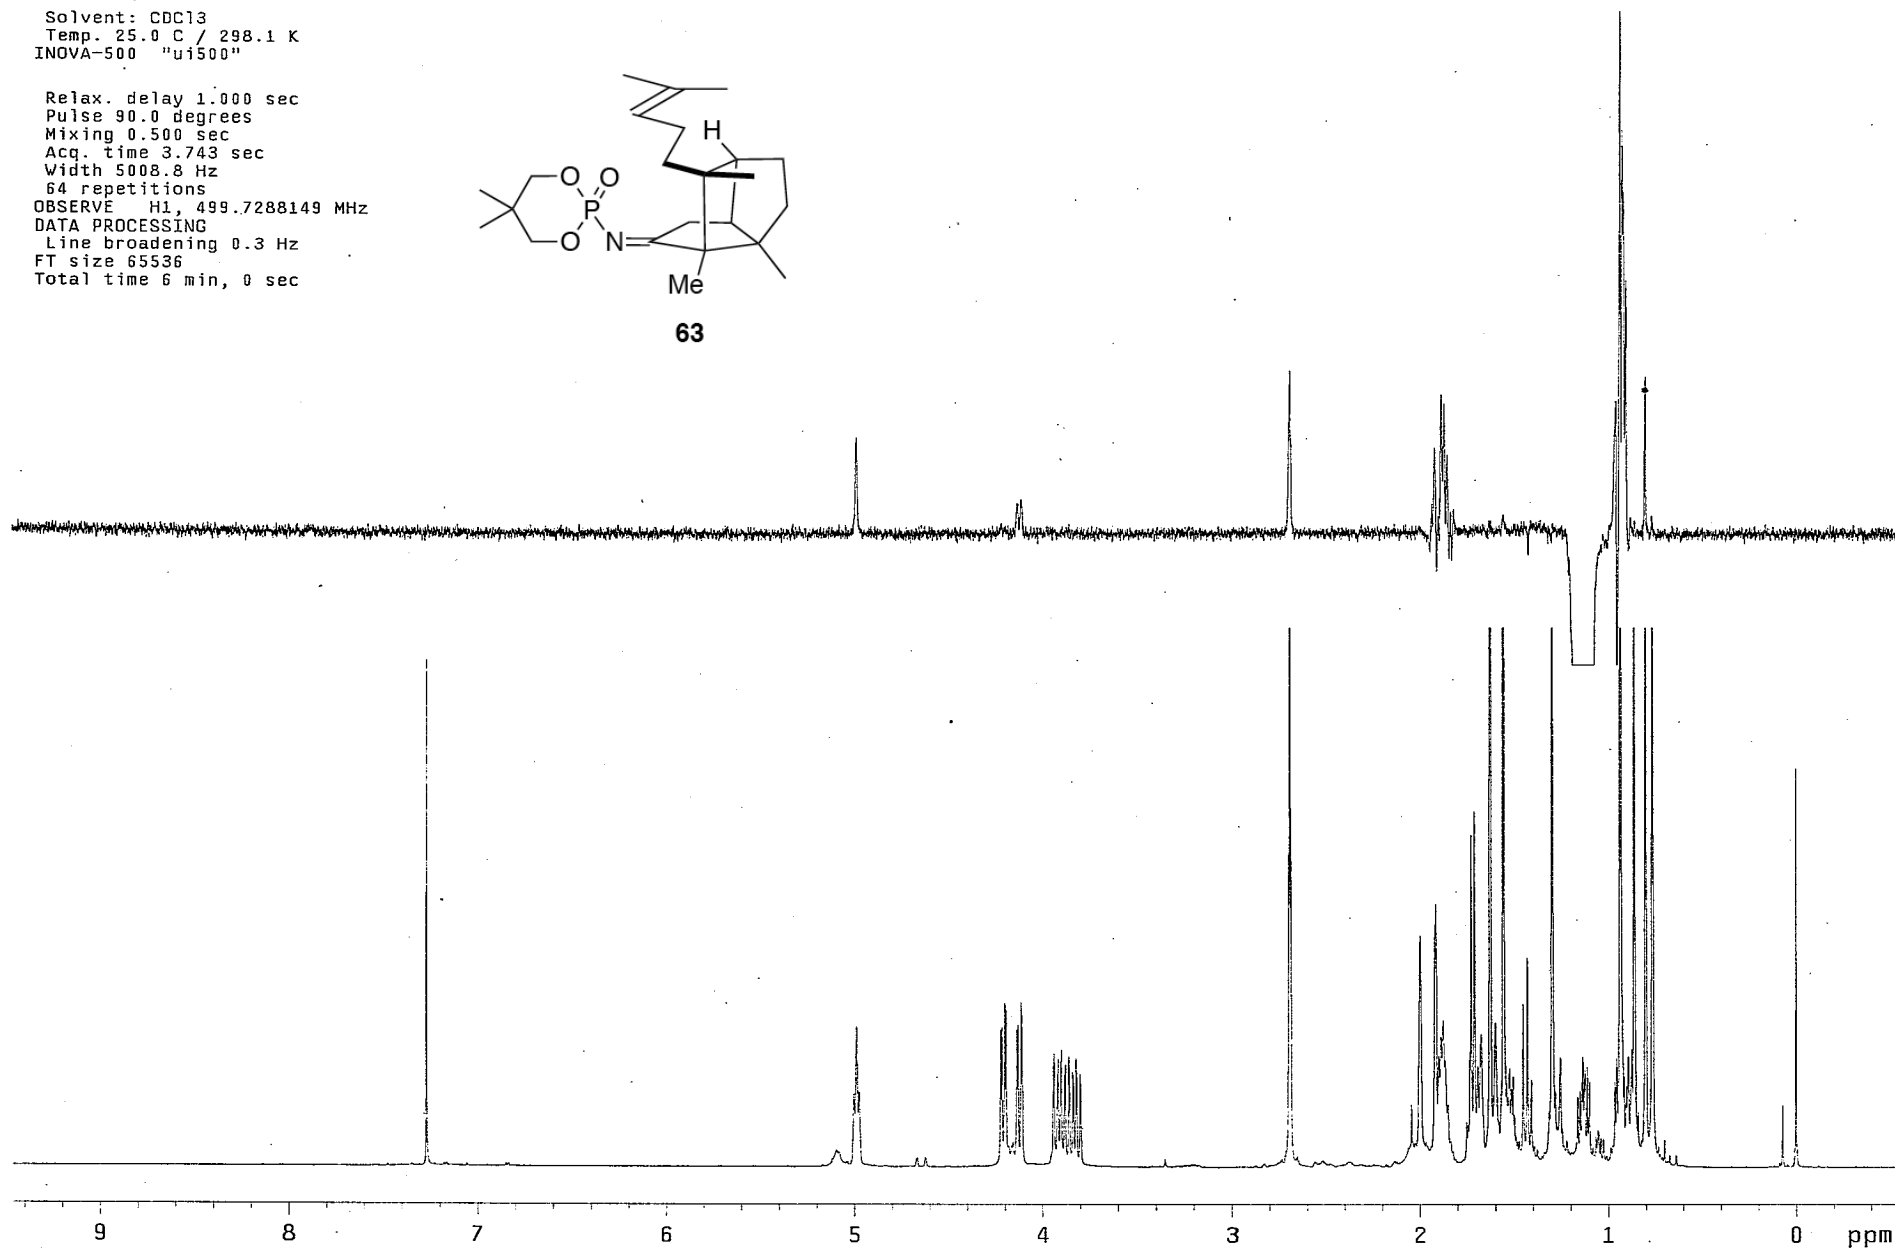

KAD-03-260FR8-9\_\_01Feb2012

Archive directory: /export/home/kyle/vnmrsys/data  
Sample directory: KAD-03-260FR8-9\_\_01Feb2012  
File: NOESY1D\_0\_94p

Pulse Sequence: NOESY1D

Solvent: CDCl3  
Temp. 25.0 C / 298.1 K  
INOVA-500 "ui500"

Relax. delay 1.000 sec  
Pulse 90.0 degrees  
Mixing 0.500 sec  
Acq. time 3.743 sec  
Width 5008.8 Hz  
64 repetitions  
OBSERVE H1, 499.7288149 MHz  
DATA PROCESSING  
Line broadening 0.3 Hz  
FT size 65536  
Total time 6 min, 15 sec

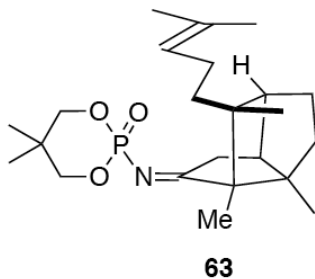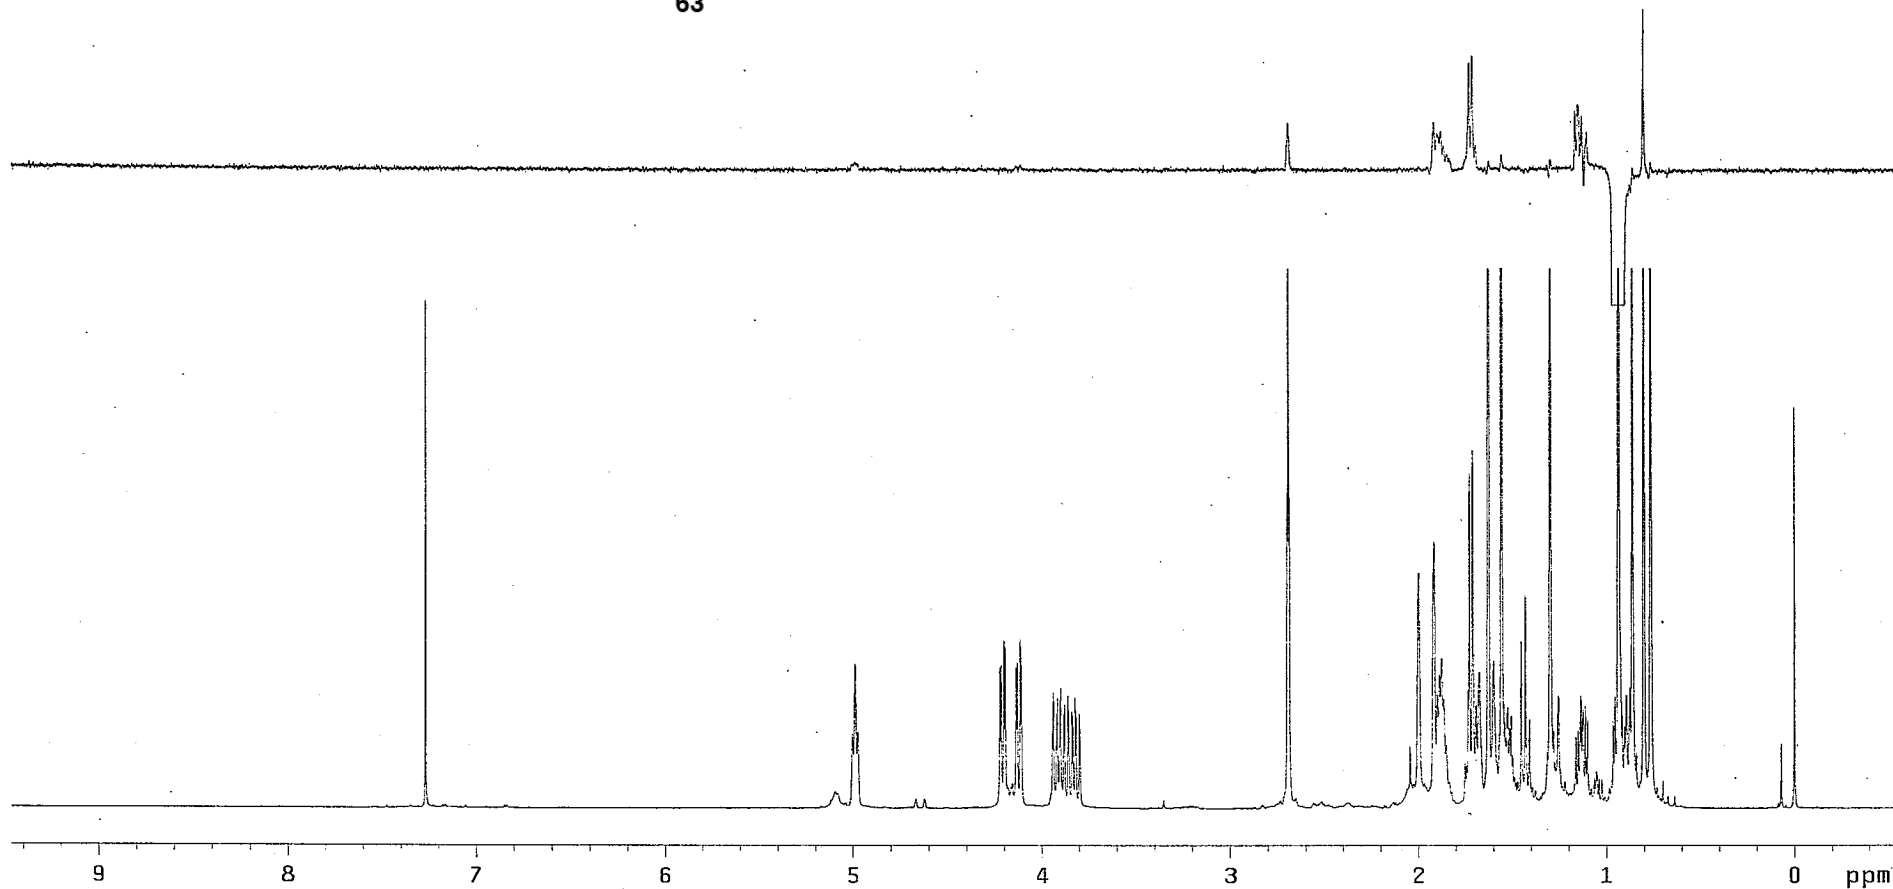



KAD-03-260FR8-9\_\_01Feb2012

Archive directory: /export/home/kyle/vnmrsys/data  
Sample directory: KAD-03-260FR8-9\_\_01Feb2012  
File: NOESY1D\_0\_86p

Pulse Sequence: NOESY1D

Solvent: CDC13  
Temp. 25.0 C / 298.1 K  
INOVA-500 "u1500"

Relax. delay 1.000 sec  
Pulse 90.0 degrees  
Mixing 0.500 sec  
Acq. time 3.743 sec  
Width 5008.8 Hz  
12 repetitions  
OBSERVE H1, 499.7288149 MHz  
DATA PROCESSING  
Line broadening 0.3 Hz  
FT size 65536  
Total time 6 min, 15 sec

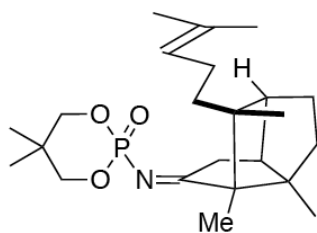

63

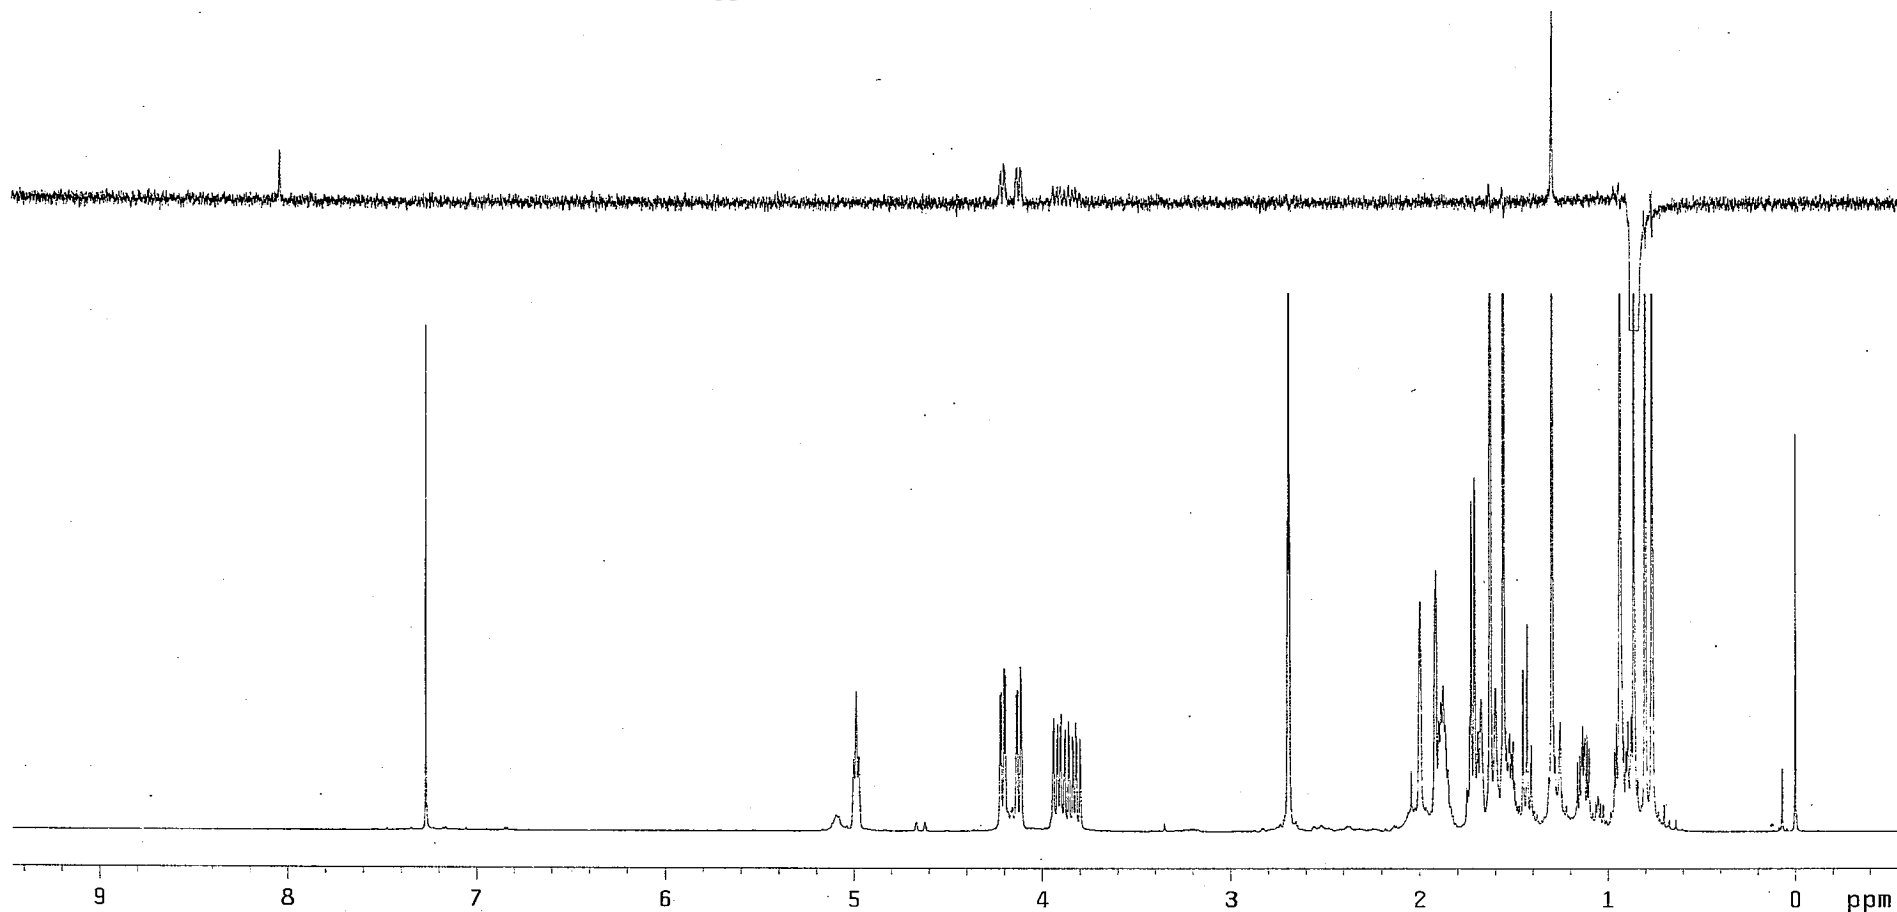

KAD-03-260FR8-9\_\_01Feb2012

Archive directory: /export/home/kyle/vnmrsys/data  
Sample directory: KAD-03-260FR8-9\_\_01Feb2012  
File: NOESY1D\_0\_81p

Pulse Sequence: NOESY1D

Solvent: CDCl3  
Temp. 25.0 C / 298.1 K  
INOVA-500 "ui500"

Relax. delay 1.000 sec  
Pulse 90.0 degrees  
Mixing 0.500 sec  
Acq. time 3.743 sec  
Width 5008.8 Hz  
64 repetitions  
OBSERVE H1, 499.7288149 MHz  
DATA PROCESSING  
Line broadening 0.3 Hz  
FT size 65536  
Total time 6 min, 15 sec

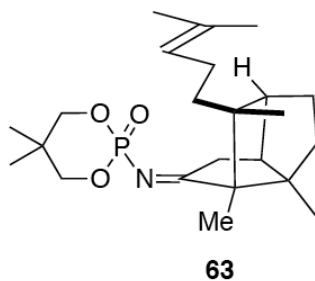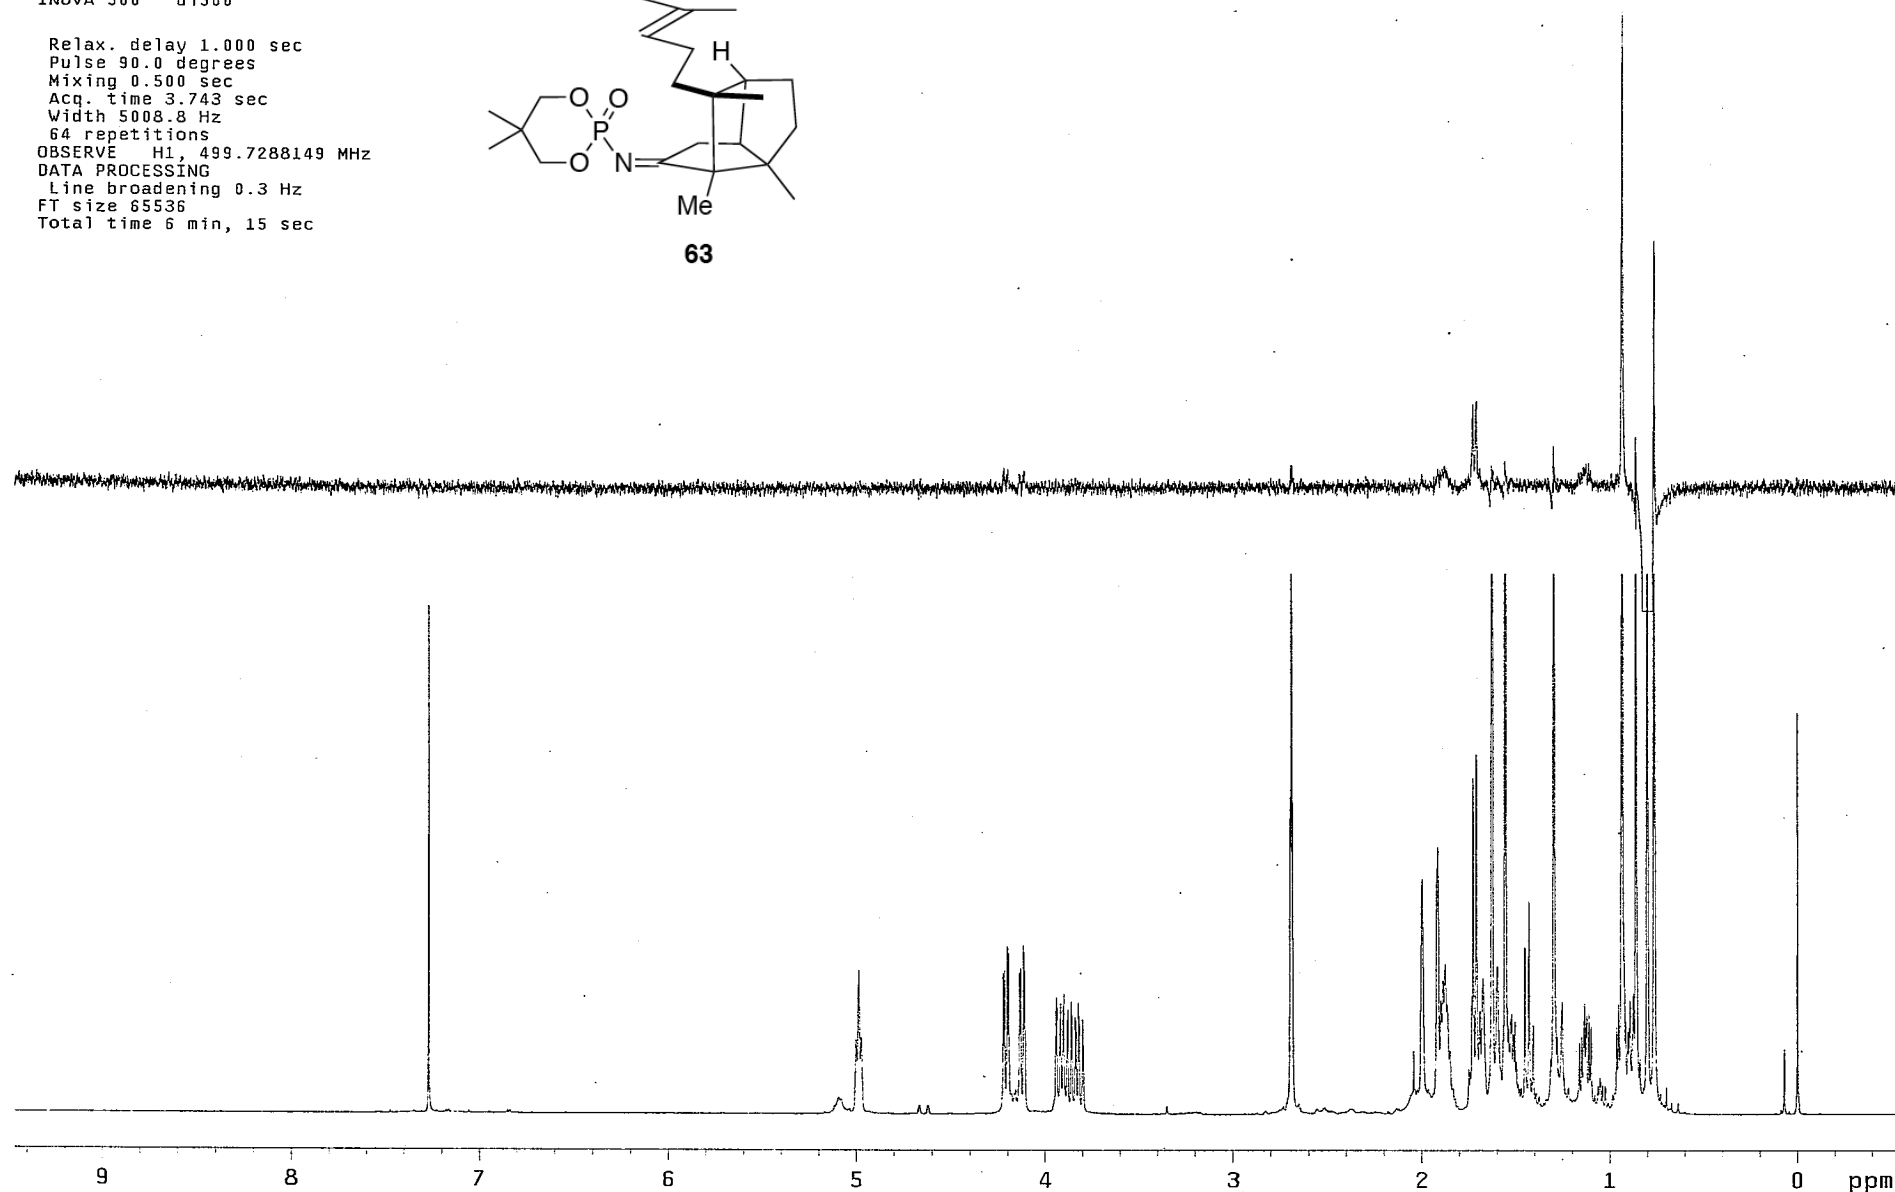

Supplement: NIHMS490886-supplement-1_si_001.pdf [file NIHMS490886-supplement-1_si_001.pdf]
